# Supplementary material for: XGBoost-based prediction of spontaneous preterm birth using maternal factors and serum markers: a retrospective cohort study
Source: Research Square preprint supplement (doi:10.21203/rs.3.rs-6970183/v1), 2025-07-18
Supplement: Supplementary file 1 [file 323ae699d5232471c15ff7db.xlsx]

## Sheet: Sheet2
ID	Age	GW	babysex	Ethnic	Education	Insurance	preBMI	Abortion>=3	nulliparous	alcohol_husband	smoking_husband	PTB37	PTB34	sPTB	ART	History_of_cesarean_section	asthma	Diabetes(1GDM_2T2DM)	primary_hypertension	Fetal_distress	neonatal_asphyxia	PAPPA_1	hCG_1	NT	AFP_2	hCG_2	uE3_2	PAPPA_1_week	hCG_1_week	NT_week	AFP_2_week	hCG_2_week	uE3_2_week	PAPPA_1_MOM	PAPPA_1_MOM_log	hCG_1_MOM	hCG_1_MOM_log	NT_MOM	NT_MOM_log	AFP_2_MOM	AFP_2_MOM_log	hCG_2_MOM	hCG_2_MOM_log	uE3_2_MOM	uE3_2_MOM_log
276957	27	39	1	1	1	0	18.8189	0	0	0	0	0	0	0	0	0	0	0	0	0	0	0.36	0.58	1.1	1.1	0.7	0.93	13	13	13	18	18	18	0.367347	-1.00145	0.604167	-0.503905	1.1	0.0953102	1.11111	0.105361	0.744681	-0.2948	0.885714	-0.121361
276966	22	40	0	1	1	1	16.6933	0	0	0	1	0	0	0	0	0	0	0	0	0	0	1.6	0.54	0.6	0.93	0.89	1.18	12	12	12	16	16	16	1.63265	0.490206	0.5625	-0.575364	0.6	-0.510826	0.939394	-0.0625204	0.89899	-0.106483	1.16832	0.155564
273443	29	40	0	1	1	1	21.7373	0	0	0	1	0	0	0	0	0	0	1	0	0	0	0.8	0.44	1	1.49	0.35	1.43	12	12	12	16	16	16	0.816327	-0.202941	0.458333	-0.780159	1	0	1.50505	0.408826	0.353535	-1.03977	1.41584	0.347724
226634	30	40	0	1	1	1	18.4265	0	1	0	0	0	0	0	0	0	0	0	0	0	0	0.84	0.69	0.9	0.98	0.46	1.27	12	12	12	16	16	16	0.857143	-0.154151	0.71875	-0.330242	0.9	-0.105361	0.989899	-0.0101524	0.464646	-0.766478	1.25743	0.229067
276736	22	38	0	1	0	0	18.2899	0	0	1	1	0	0	0	0	0	0	0	0	0	0	0.8	0.56	1.4	0.76	0.52	1.61	13	13	13	17	17	17	0.816327	-0.202941	0.583333	-0.538997	1.4	0.336472	0.767677	-0.264387	0.541667	-0.613104	1.57843	0.456432
276747	29	41	0	1	1	1	19.563	0	0	1	0	0	0	0	0	0	0	0	0	0	0	0.96	0.77	0.7	0.85	0.79	1.61	13	13	13	17	17	17	0.979592	-0.0206193	0.802083	-0.220543	0.7	-0.356675	0.858586	-0.152469	0.822917	-0.1949	1.57843	0.456432
275496	24	40	1	0	0	0	20.7756	0	1	0	0	0	0	0	0	0	0	0	0	0	0	1.07	1.25	1.4	1.17	0.83	1.2	14	14	14	18	18	18	1.01905	0.0188685	1.34409	0.295714	1.4	0.336472	1.18182	0.167054	0.882979	-0.124454	1.14286	0.133531
275648	25	39	0	1	0	1	21.0715	0	0	0	1	0	0	0	0	0	0	0	0	0	0	1.64	0.83	1.5	1.13	1.88	1.4	12	12	12	16	16	16	1.67347	0.514899	0.864583	-0.145508	1.5	0.405465	1.14141	0.132268	1.89899	0.641322	1.38614	0.326522
276674	30	39	0	1	1	0	25.8735	0	0	0	1	0	0	0	0	0	0	1	0	0	0	0.44	1.01	1	0.6	0.86	1.42	12	12	12	17	17	17	0.44898	-0.800778	1.05208	0.0507723	1	0	0.606061	-0.500775	0.895833	-0.110001	1.39216	0.330854
182726	33	38	0	1	1	1	20.0288	0	1	0	0	0	0	0	0	0	0	0	0	0	0	0.27	0.85	0.7	0.71	0.39	0.73	12	12	12	16	16	16	0.27551	-1.28913	0.885417	-0.121697	0.7	-0.356675	0.717172	-0.33244	0.393939	-0.931558	0.722772	-0.324661
276720	26	39	1	1	1	1	20.1362	0	0	1	0	0	0	0	0	0	0	0	0	0	0	0.39	0.92	0.7	1.1	0.81	0.9	13	13	13	17	17	17	0.397959	-0.921406	0.958333	-0.0425596	0.7	-0.356675	1.11111	0.105361	0.84375	-0.169899	0.882353	-0.125163
276765	31	38	0	1	0	1	19.6055	0	0	0	0	0	0	0	0	0	0	0	0	0	0	0.37	0.84	0.8	1.25	1.29	1.04	12	12	12	16	16	16	0.377551	-0.97405	0.875	-0.133531	0.8	-0.223144	1.26263	0.233194	1.30303	0.264693	1.0297	0.0292704
276207	30	39	0	1	1	1	22.2063	0	0	0	0	0	0	0	0	0	0	0	0	0	0	1.17	1.74	1	0.76	2.09	1.09	13	13	13	17	17	17	1.19388	0.177206	1.8125	0.594707	1	0	0.767677	-0.264387	2.17708	0.777986	1.06863	0.0663751
107730	35	39	1	1	1	1	23.1133	0	1	0	0	0	0	0	0	0	0	1	0	0	0	0.99	1.57	1.2	0.81	2.17	1.73	13	13	13	17	17	17	1.0102	0.0101524	1.63542	0.491898	1.2	0.182322	0.818182	-0.200671	2.26042	0.815549	1.69608	0.528319
276249	30	40	0	1	1	1	17.2954	0	1	1	1	0	0	0	0	0	0	0	0	0	0	1.27	0.76	0.8	0.61	0.51	1.64	12	12	12	17	17	17	1.29592	0.25922	0.791667	-0.233615	0.8	-0.223144	0.616162	-0.484246	0.53125	-0.632523	1.60784	0.474894
275905	26	39	1	1	0	0	16.2278	0	0	1	1	0	0	0	0	0	0	0	0	0	0	0.6	0.69	0.8	0.88	0.66	1.53	13	13	13	17	17	17	0.612245	-0.490623	0.71875	-0.330242	0.8	-0.223144	0.888889	-0.117783	0.6875	-0.374693	1.5	0.405465
145578	29	40	0	1	1	1	22.151	0	1	0	0	0	0	0	0	0	0	0	0	0	0	0.52	0.7	1	1	0.36	1.26	13	13	13	17	17	17	0.530612	-0.633724	0.729167	-0.315853	1	0	1.0101	0.0100503	0.375	-0.980829	1.23529	0.211309
275462	26	38	0	1	0	1	18.8271	0	0	1	1	0	0	0	0	0	0	0	0	0	0	0.85	0.8	0.9	0.94	1.06	1.17	13	13	13	17	17	17	0.867347	-0.142316	0.833333	-0.182322	0.9	-0.105361	0.949495	-0.0518251	1.10417	0.0990909	1.14706	0.137201
275482	35	39	0	1	1	1	21.0938	0	1	1	1	0	0	0	0	1	0	0	0	0	0	1.86	0.33	1.2	0.88	0.27	1.75	13	13	13	17	17	17	1.89796	0.640779	0.34375	-1.06784	1.2	0.182322	0.888889	-0.117783	0.28125	-1.26851	1.71569	0.539813
275519	29	39	0	1	1	1	20.3125	0	1	0	1	0	0	0	0	1	0	0	0	0	0	1.48	0.45	0.7	0.71	0.74	1.21	14	14	14	18	18	18	1.40952	0.343252	0.483871	-0.725937	0.7	-0.356675	0.717172	-0.33244	0.787234	-0.23923	1.15238	0.14183
276582	27	39	1	1	0	1	18.2899	0	1	1	0	0	0	0	0	0	0	0	0	0	0	1.4	1.18	0.9	0.91	0.8	1.43	13	13	13	17	17	17	1.42857	0.356675	1.22917	0.206336	0.9	-0.105361	0.919192	-0.0842603	0.833333	-0.182322	1.40196	0.337872
163427	34	39	0	0	1	1	24.2188	0	1	0	0	0	0	0	0	1	0	0	0	0	0	0.46	0.44	0.7	0.62	0.69	1.01	12	12	12	15	15	15	0.469388	-0.756326	0.458333	-0.780159	0.7	-0.356675	0.62	-0.478036	0.663462	-0.410284	1.03061	0.030153
276764	28	40	0	0	1	1	20.0288	0	0	0	0	0	0	0	1	0	0	0	0	0	0	3.52	1.97	0.8	2.36	1.49	2.27	12	12	12	17	17	17	3.59184	1.27866	2.05208	0.718856	0.8	-0.223144	2.38384	0.868712	1.55208	0.439598	2.22549	0.799977
276797	27	40	1	1	0	1	20.6905	0	0	0	1	0	0	0	0	0	0	1	0	0	0	2.22	1.97	1.3	1.12	1.78	1.24	13	13	13	17	17	17	2.26531	0.81771	2.05208	0.718856	1.3	0.262364	1.13131	0.123379	1.85417	0.617435	1.21569	0.195309
162866	28	41	0	1	0	1	17.4449	0	1	0	0	0	0	0	0	0	0	0	0	0	0	0.72	1.41	1.2	0.97	1.11	0.95	13	13	13	18	18	18	0.734694	-0.308301	1.46875	0.384412	1.2	0.182322	0.979798	-0.0204089	1.18085	0.166235	0.904762	-0.100083
276822	21	39	1	1	1	1	19.8413	0	0	0	0	0	0	0	0	0	0	0	0	0	0	0.94	0.62	0.6	0.85	0.61	0.64	12	12	12	17	17	17	0.959184	-0.0416727	0.645833	-0.437214	0.6	-0.510826	0.858586	-0.152469	0.635417	-0.453474	0.627451	-0.46609
275330	20	39	0	1	1	0	18.026	0	0	1	1	0	0	0	0	0	0	0	0	1	0	0.78	2.13	1.2	1.01	2.63	0.91	12	12	12	17	17	17	0.795918	-0.228259	2.21875	0.796944	1.2	0.182322	1.0202	0.0200007	2.73958	1.00781	0.892157	-0.114113
277383	28	38	1	1	1	1	19.3001	0	0	0	0	0	0	0	0	0	0	1	0	0	0	1.8	0.29	0.8	1.1	0.36	1.05	13	13	13	17	17	17	1.83673	0.607989	0.302083	-1.19705	0.8	-0.223144	1.11111	0.105361	0.375	-0.980829	1.02941	0.0289875
277401	17	41	0	1	0	0	22.22	0	0	0	0	0	0	0	0	0	0	0	0	0	0	2.18	1.05	0.9	1.32	1.08	0.96	12	12	12	16	16	16	2.22449	0.799528	1.09375	0.0896122	0.9	-0.105361	1.33333	0.287682	1.09091	0.0870114	0.950495	-0.0507723
277472	26	38	1	1	1	1	20.4294	0	0	0	0	0	0	0	0	0	0	0	0	0	0	1.86	2.12	1.3	1.26	3.07	1.19	13	13	13	18	18	18	1.89796	0.640779	2.20833	0.792238	1.3	0.262364	1.27273	0.241162	3.26596	1.18355	1.13333	0.125163
204459	27	39	1	1	1	1	18.9036	0	1	0	1	0	0	0	0	0	0	0	0	0	0	0.76	0.73	0.9	1.22	0.71	1.8	13	13	13	17	17	17	0.77551	-0.254234	0.760417	-0.273889	0.9	-0.105361	1.23232	0.208901	0.739583	-0.301668	1.76471	0.567984
227420	40	38	1	1	1	0	20.0288	0	1	1	1	0	0	0	1	1	0	0	0	0	0	1	0.18	1.1	1.03	0.2	1.26	13	13	13	17	17	17	1.02041	0.0202027	0.1875	-1.67398	1.1	0.0953102	1.0404	0.0396091	0.208333	-1.56862	1.23529	0.211309
277568	35	40	1	1	0	1	19.1001	1	1	1	1	0	0	0	0	0	0	0	0	0	0	0.6	0.55	1.1	1.1	0.38	1.01	13	13	13	17	17	17	0.612245	-0.490623	0.572917	-0.557015	1.1	0.0953102	1.11111	0.105361	0.395833	-0.926762	0.990196	-0.0098523
265183	32	37	1	1	1	1	23.4221	0	0	0	0	0	0	0	0	0	0	1	0	0	0	1.17	0.39	1	0.96	0.58	0.8	12	12	12	16	16	16	1.19388	0.177206	0.40625	-0.900787	1	0	0.969697	-0.0307717	0.585859	-0.534677	0.792079	-0.233094
263353	26	41	0	1	1	1	27.3438	0	0	1	1	0	0	0	0	0	0	0	0	0	0	1.41	1	1.1	1.09	0.77	1.04	13	13	13	17	17	17	1.43878	0.363792	1.04167	0.040822	1.1	0.0953102	1.10101	0.096228	0.802083	-0.220543	1.01961	0.0194181
276920	30	39	1	1	1	1	17.5781	0	1	0	0	0	0	0	0	0	0	0	0	0	0	1.57	1.08	1.1	1.17	1.12	1.23	12	12	12	16	16	16	1.60204	0.471278	1.125	0.117783	1.1	0.0953102	1.18182	0.167054	1.13131	0.123379	1.21782	0.197064
276943	22	38	1	1	0	0	16.7657	0	1	0	0	0	0	0	0	0	0	0	0	0	0	0.64	0.33	0.9	0.95	0.34	1.21	12	12	12	16	16	16	0.653061	-0.426084	0.34375	-1.06784	0.9	-0.105361	0.959596	-0.041243	0.343434	-1.06876	1.19802	0.18067
231950	30	39	0	1	1	1	21.2306	0	0	1	0	0	0	0	0	0	0	0	0	0	0	1.12	2.21	0.9	1.01	1.74	1.66	12	12	12	16	16	16	1.14286	0.133531	2.30208	0.833815	0.9	-0.105361	1.0202	0.0200007	1.75758	0.563935	1.64356	0.496867
199963	31	39	1	1	1	1	25.2994	0	1	0	0	0	0	0	0	0	0	0	0	0	0	0.95	0.82	1.1	0.54	0.57	0.98	12	12	12	15	15	15	0.969388	-0.0310906	0.854167	-0.157629	1.1	0.0953102	0.54	-0.616186	0.548077	-0.60134	1	0
275387	25	39	1	1	1	1	23.0469	0	0	0	0	0	0	0	0	0	0	0	0	0	0	1.44	1.97	1	1.27	2.09	1.16	12	12	12	16	16	16	1.46939	0.384846	2.05208	0.718856	1	0	1.28283	0.249067	2.11111	0.747214	1.14851	0.13847
205172	33	39	0	1	1	0	17.9089	0	1	0	0	0	0	0	0	0	0	0	0	0	0	1.66	1.33	0.9	1.69	1.28	1.29	13	13	13	16	16	16	1.69388	0.52702	1.38542	0.326001	0.9	-0.105361	1.70707	0.534779	1.29293	0.25691	1.27723	0.244692
162077	36	39	0	1	0	1	25.7819	0	1	0	0	0	0	0	0	1	0	0	0	0	0	1.69	1.37	0.7	0.82	0.92	1.12	13	13	13	17	17	17	1.72449	0.544931	1.42708	0.355633	0.7	-0.356675	0.828283	-0.188401	0.958333	-0.0425596	1.09804	0.0935261
275435	27	39	0	1	0	1	17.8506	0	0	1	1	0	0	0	0	0	0	1	0	0	0	0.93	0.5	1.3	1.05	0.42	0.7	13	13	13	16	16	16	0.94898	-0.052368	0.520833	-0.652325	1.3	0.262364	1.06061	0.0588405	0.424242	-0.85745	0.693069	-0.366625
276664	24	40	0	1	1	1	24.6875	0	0	0	0	0	0	0	0	0	0	1	0	0	0	0.56	0.61	1.2	1.58	1.5	0.72	13	13	13	18	18	18	0.571429	-0.559616	0.635417	-0.453474	1.2	0.182322	1.59596	0.467475	1.59574	0.467341	0.685714	-0.377294
276668	23	40	1	1	1	0	18.0697	0	0	1	1	0	0	0	0	0	0	0	0	0	0	0.6	0.75	0.8	1.15	0.71	1.01	13	13	13	18	18	18	0.612245	-0.490623	0.78125	-0.24686	0.8	-0.223144	1.16162	0.149812	0.755319	-0.280615	0.961905	-0.0388398
190687	27	39	1	1	0	0	20.1951	0	1	0	1	0	0	0	0	0	0	0	0	0	0	0.93	0.27	1.1	0.66	0.21	1.16	13	13	13	18	18	18	0.94898	-0.052368	0.28125	-1.26851	1.1	0.0953102	0.666667	-0.405465	0.223404	-1.49877	1.10476	0.0996298
266000	27	39	0	1	0	0	17.9649	0	1	1	0	0	0	0	0	1	0	0	0	0	0	1.96	1.69	1	0.82	2.87	0.97	12	12	12	17	17	17	2	0.693147	1.76042	0.565551	1	0	0.828283	-0.188401	2.98958	1.09513	0.95098	-0.0502618
276516	29	38	1	1	1	0	20.202	0	0	0	0	0	0	0	0	0	0	0	0	0	0	0.86	1.82	1.1	1.09	2.16	1.57	12	12	12	17	17	17	0.877551	-0.13062	1.89583	0.639658	1.1	0.0953102	1.10101	0.096228	2.25	0.81093	1.53922	0.431273
276517	29	39	1	1	1	1	21.7193	0	0	0	0	0	0	0	0	0	0	0	0	0	0	0.9	1.04	1.2	0.86	1	1.41	13	13	13	17	17	17	0.918367	-0.0851578	1.08333	0.0800427	1.2	0.182322	0.868687	-0.140773	1.04167	0.040822	1.38235	0.323787
276527	34	39	1	1	1	1	20.7008	0	1	0	0	0	0	0	0	1	0	1	0	0	0	0.54	0.79	1	0.93	0.95	0.71	13	13	13	17	17	17	0.55102	-0.595983	0.822917	-0.1949	1	0	0.939394	-0.0625204	0.989583	-0.0104713	0.696078	-0.362293
276592	33	40	1	1	1	1	19.9481	0	0	1	1	0	0	0	0	0	0	1	0	0	0	1.13	2.36	1	1.83	3.15	0.88	12	12	12	16	16	16	1.15306	0.14242	2.45833	0.899484	1	0	1.84848	0.614366	3.18182	1.15745	0.871287	-0.137784
275402	22	39	1	1	0	0	22.0741	0	0	0	0	0	0	0	0	0	0	0	0	0	0	0.52	0.64	1.1	1.01	1.21	1.28	14	14	14	20	20	20	0.495238	-0.702717	0.688172	-0.373716	1.1	0.0953102	1	0	1.31522	0.274002	1.19626	0.179201
275461	31	39	1	1	1	1	20.5457	0	1	0	0	0	0	0	0	1	0	1	0	0	0	0.66	0.46	0.8	0.62	0.55	0.86	13	13	13	17	17	17	0.673469	-0.395313	0.479167	-0.735707	0.8	-0.223144	0.626263	-0.467985	0.572917	-0.557015	0.843137	-0.170626
262495	28	40	1	1	1	1	19.1327	0	0	0	0	0	0	0	0	0	0	0	0	0	0	1.37	3.55	0.9	1.75	6.68	0.88	12	12	12	16	16	16	1.39796	0.335013	3.69792	1.30777	0.9	-0.105361	1.76768	0.569666	6.74747	1.90917	0.871287	-0.137784
275478	31	40	1	1	1	1	27.2633	0	0	0	0	0	0	0	0	0	0	1	0	0	0	1.66	3.22	0.9	1.15	2.71	0.99	12	12	12	16	16	16	1.69388	0.52702	3.35417	1.2102	0.9	-0.105361	1.16162	0.149812	2.73737	1.007	0.980198	-0.0200007
275491	35	38	1	1	1	1	21.299	0	1	1	1	0	0	0	0	0	0	1	0	0	0	0.31	0.95	1.3	0.93	0.59	0.95	13	13	13	17	17	17	0.316327	-1.15098	0.989583	-0.0104713	1.3	0.262364	0.939394	-0.0625204	0.614583	-0.486811	0.931373	-0.0710959
211858	25	39	0	1	1	0	18.4911	0	1	0	0	0	0	0	0	1	0	0	0	0	0	1.78	2.69	1.2	1.03	3.12	1.1	13	13	13	17	17	17	1.81633	0.596816	2.80208	1.03036	1.2	0.182322	1.0404	0.0396091	3.25	1.17865	1.07843	0.0755076
110095	32	38	1	1	1	0	20.9566	0	1	0	0	0	0	0	0	0	0	0	0	0	0	2.44	0.75	0.6	0.72	0.71	0.79	13	13	13	17	17	17	2.4898	0.912201	0.78125	-0.24686	0.6	-0.510826	0.727273	-0.318454	0.739583	-0.301668	0.77451	-0.255525
117005	28	39	1	1	1	0	22.3133	0	1	1	0	0	0	0	0	0	0	1	0	0	0	1.07	0.68	1.2	0.5	1.06	1.23	12	12	12	16	16	16	1.09184	0.0878614	0.708333	-0.34484	1.2	0.182322	0.505051	-0.683097	1.07071	0.0683192	1.21782	0.197064
180547	29	39	1	1	1	1	22.6757	0	1	0	0	0	0	0	0	0	0	1	0	0	0	1.15	0.78	1.1	0.78	1	0.9	13	13	13	18	18	18	1.17347	0.159965	0.8125	-0.207639	1.1	0.0953102	0.787879	-0.238411	1.06383	0.0618754	0.857143	-0.154151
188598	33	40	0	1	1	1	23.0681	0	1	0	0	0	0	0	0	0	0	1	0	0	0	0.62	1.28	0.9	0.89	1.18	1.58	13	13	13	17	17	17	0.632653	-0.457833	1.33333	0.287682	0.9	-0.105361	0.89899	-0.106483	1.22917	0.206336	1.54902	0.437622
276117	27	39	1	1	0	1	19.9293	0	0	0	0	0	0	0	0	0	0	0	0	0	0	1.35	0.85	1.2	1.38	1.53	0.84	13	13	13	17	17	17	1.37755	0.320307	0.885417	-0.121697	1.2	0.182322	1.39394	0.332134	1.59375	0.46609	0.823529	-0.194156
276657	34	40	0	1	1	0	22.7732	0	1	0	1	0	0	0	0	0	0	0	0	0	0	0.94	1.39	1.1	1	1.65	1.58	12	12	12	16	16	16	0.959184	-0.0416727	1.44792	0.370126	1.1	0.0953102	1.0101	0.0100503	1.66667	0.510826	1.56436	0.447475
206402	30	40	0	1	1	1	23.2434	0	0	0	0	0	0	0	0	0	0	1	0	0	0	1.11	2.42	1	0.97	2.14	1.46	13	13	13	17	17	17	1.13265	0.124563	2.52083	0.92459	1	0	0.979798	-0.0204089	2.22917	0.801628	1.43137	0.358634
276177	28	37	1	1	0	1	20.8325	0	0	0	1	0	0	0	0	0	0	0	0	0	0	0.73	1.2	0.9	1	2.09	1.19	12	12	12	17	17	17	0.744898	-0.294508	1.25	0.223144	0.9	-0.105361	1.0101	0.0100503	2.17708	0.777986	1.16667	0.154151
234195	24	40	0	1	0	0	16.7657	0	1	0	1	0	0	0	0	0	0	0	0	0	0	1.12	0.94	0.8	0.71	0.77	0.83	12	12	12	17	17	17	1.14286	0.133531	0.979167	-0.0210534	0.8	-0.223144	0.717172	-0.33244	0.802083	-0.220543	0.813725	-0.206132
277569	23	40	1	1	1	1	17.6309	0	0	0	0	0	0	0	0	0	0	0	0	0	0	0.89	1.49	0.8	1.24	1.06	0.78	12	12	12	16	16	16	0.908163	-0.0963311	1.55208	0.439598	0.8	-0.223144	1.25253	0.225162	1.07071	0.0683192	0.772277	-0.258412
277580	32	40	1	1	1	1	19.5312	0	0	0	0	0	0	0	0	0	0	1	0	0	0	0.77	0.68	0.8	1.25	0.35	1.09	13	13	13	17	17	17	0.785714	-0.241162	0.708333	-0.34484	0.8	-0.223144	1.26263	0.233194	0.364583	-1.009	1.06863	0.0663751
277582	28	40	1	1	0	1	19.8178	0	0	0	0	0	0	0	0	0	0	0	0	0	0	1.88	2.78	1.2	1.57	1.29	1.24	13	13	13	17	17	17	1.91837	0.651474	2.89583	1.06327	1.2	0.182322	1.58586	0.461126	1.34375	0.295464	1.21569	0.195309
277584	30	39	0	1	1	0	18.328	0	0	0	1	0	0	0	0	0	0	0	0	0	0	0.84	2.5	0.7	0.78	1.37	1.13	12	12	12	16	16	16	0.857143	-0.154151	2.60417	0.957113	0.7	-0.356675	0.787879	-0.238411	1.38384	0.324861	1.11881	0.112267
277653	29	38	1	1	1	0	22.8331	0	1	1	1	0	0	0	0	0	0	0	0	0	0	0.59	0.41	0.8	0.77	0.45	1.08	13	13	13	18	18	18	0.602041	-0.50743	0.427083	-0.850776	0.8	-0.223144	0.777778	-0.251314	0.478723	-0.736632	1.02857	0.0281709
234081	20	38	1	1	0	0	28.7109	0	1	0	1	0	0	0	0	0	0	0	0	0	0	0.79	1.06	1.2	0.95	0.8	1.36	12	12	12	16	16	16	0.806122	-0.21552	1.10417	0.0990909	1.2	0.182322	0.959596	-0.041243	0.808081	-0.213093	1.34653	0.297534
208793	30	39	0	1	1	1	22.0317	0	1	0	1	0	0	0	0	0	0	1	0	0	0	0.65	1	0.6	1.17	1.12	1.11	12	12	12	17	17	17	0.663265	-0.41058	1.04167	0.040822	0.6	-0.510826	1.18182	0.167054	1.16667	0.154151	1.08824	0.0845574
274175	25	40	1	1	1	1	18.4202	0	0	0	0	0	0	0	0	0	0	0	0	0	0	2.05	0.55	1.4	0.86	0.7	1.26	12	12	12	17	17	17	2.09184	0.738043	0.572917	-0.557015	1.4	0.336472	0.868687	-0.140773	0.729167	-0.315853	1.23529	0.211309
274206	33	39	1	1	1	1	18.026	0	1	0	1	0	0	0	0	0	0	0	0	0	0	0.92	0.41	1	0.76	0.31	1.53	14	14	14	17	17	17	0.87619	-0.132172	0.44086	-0.819027	1	0	0.767677	-0.264387	0.322917	-1.13036	1.5	0.405465
173841	31	39	0	1	1	0	19.5312	0	1	0	0	0	0	0	0	0	0	0	0	0	0	0.34	0.7	0.8	1.69	0.57	1	13	13	13	18	18	18	0.346939	-1.05861	0.729167	-0.315853	0.8	-0.223144	1.70707	0.534779	0.606383	-0.500244	0.952381	-0.0487902
274334	23	37	1	1	1	1	24.3865	0	0	0	1	0	0	0	0	0	0	0	0	0	0	1.11	2.73	1.1	0.96	5	0.73	12	12	12	17	17	17	1.13265	0.124563	2.84375	1.04512	1.1	0.0953102	0.969697	-0.0307717	5.20833	1.65026	0.715686	-0.334513
273446	27	41	1	1	1	0	19.8141	0	0	0	0	0	0	0	0	0	0	0	0	0	0	1.51	1.43	0.8	0.9	1.27	0.88	12	12	12	16	16	16	1.54082	0.432312	1.48958	0.398496	0.8	-0.223144	0.909091	-0.0953102	1.28283	0.249067	0.871287	-0.137784
245954	28	39	0	1	1	0	19.9219	0	1	0	0	0	0	0	0	0	0	0	0	0	0	0.65	1.72	1	0.97	1.81	1.35	12	12	12	16	16	16	0.663265	-0.41058	1.79167	0.583146	1	0	0.979798	-0.0204089	1.82828	0.603377	1.33663	0.290154
274952	29	39	0	1	1	1	24.6528	0	0	0	0	0	0	0	0	0	0	0	0	0	0	0.92	1.27	0.6	0.64	0.99	1.04	14	14	14	18	18	18	0.87619	-0.132172	1.36559	0.311588	0.6	-0.510826	0.646465	-0.436237	1.05319	0.0518251	0.990476	-0.00956945
274968	32	40	1	1	1	1	27.0051	0	0	0	0	0	0	0	0	0	0	0	0	0	0	0.92	1.11	0.7	0.87	0.85	1.21	13	13	13	17	17	17	0.938776	-0.0631789	1.15625	0.145182	0.7	-0.356675	0.878788	-0.129212	0.885417	-0.121697	1.18627	0.170818
274985	23	39	0	1	1	1	16.2311	0	0	0	1	0	0	0	0	0	0	0	0	0	0	1.49	1.66	1.2	1.39	1.11	1.07	13	13	13	17	17	17	1.52041	0.418979	1.72917	0.54764	1.2	0.182322	1.40404	0.339354	1.15625	0.145182	1.04902	0.047856
274459	27	40	1	1	1	1	17.2635	0	1	0	1	0	0	0	0	0	0	0	0	0	0	1.26	1.14	0.8	1.13	0.93	1.05	13	13	13	17	17	17	1.28571	0.251314	1.1875	0.17185	0.8	-0.223144	1.14141	0.132268	0.96875	-0.0317487	1.02941	0.0289875
274472	30	39	0	1	1	1	18.662	0	0	0	0	0	0	0	0	0	0	1	0	0	0	1.78	0.57	0.9	0.82	0.81	1.3	14	14	14	17	17	17	1.69524	0.527823	0.612903	-0.489548	0.9	-0.105361	0.828283	-0.188401	0.84375	-0.169899	1.27451	0.242562
202725	27	40	0	1	1	1	20.1951	0	1	0	0	0	0	0	0	0	0	1	0	0	0	0.89	0.89	0.8	0.77	0.63	1.1	13	13	13	18	18	18	0.908163	-0.0963311	0.927083	-0.0757118	0.8	-0.223144	0.777778	-0.251314	0.670213	-0.40016	1.04762	0.04652
135534	32	39	1	1	1	0	21.3593	0	1	0	0	0	0	0	0	0	0	0	0	0	0	1.6	3.08	1.5	0.81	2.02	1.62	12	12	12	16	16	16	1.63265	0.490206	3.20833	1.16575	1.5	0.405465	0.818182	-0.200671	2.0404	0.713148	1.60396	0.472476
273301	23	38	1	1	1	1	21.3039	0	0	0	0	0	0	0	0	0	0	1	0	0	0	1.14	0.44	0.9	1.2	0.61	1.33	13	13	13	17	17	17	1.16327	0.151231	0.458333	-0.780159	0.9	-0.105361	1.21212	0.192372	0.635417	-0.453474	1.30392	0.265376
273380	29	40	0	1	1	1	17.7096	0	0	0	0	0	0	0	0	0	0	0	0	0	0	0.91	2.07	0.9	0.71	1.35	1.1	12	12	12	17	17	17	0.928571	-0.074108	2.15625	0.768371	0.9	-0.105361	0.717172	-0.33244	1.40625	0.340927	1.07843	0.0755076
272629	34	39	0	1	1	1	24.7768	0	1	0	0	0	0	0	0	0	0	0	0	0	0	1.02	0.48	0.8	0.78	0.46	1.31	12	12	12	17	17	17	1.04082	0.0400053	0.5	-0.693147	0.8	-0.223144	0.787879	-0.238411	0.479167	-0.735707	1.28431	0.250225
209341	30	40	0	1	0	0	24.6094	0	1	0	0	0	0	0	0	0	0	0	0	0	0	0.92	0.73	0.7	0.93	0.81	1.31	13	13	13	16	16	16	0.938776	-0.0631789	0.760417	-0.273889	0.7	-0.356675	0.939394	-0.0625204	0.818182	-0.200671	1.29703	0.260077
273748	25	40	0	1	0	0	20.9566	0	0	0	0	0	0	0	0	0	0	0	0	0	0	0.98	1.71	0.8	1	1.14	1.06	12	12	12	17	17	17	1	0	1.78125	0.577315	0.8	-0.223144	1.0101	0.0100503	1.1875	0.17185	1.03922	0.0384663
273802	26	39	1	0	1	1	19.8882	0	0	0	0	0	0	0	0	0	0	0	0	0	0	1.17	0.79	0.8	1.19	0.92	0.82	13	13	13	17	17	17	1.19388	0.177206	0.822917	-0.1949	0.8	-0.223144	1.20202	0.184004	0.958333	-0.0425596	0.803922	-0.218254
273803	25	36	1	1	0	1	19.6283	0	0	1	1	1	0	1	0	0	0	0	0	0	0	1.29	0.4	0.9	1.32	0.74	1.14	12	12	12	16	16	16	1.31633	0.274845	0.416667	-0.875469	0.9	-0.105361	1.33333	0.287682	0.747475	-0.291055	1.12871	0.121078
270950	35	40	0	1	1	1	17.9688	0	1	0	0	0	0	0	0	1	0	1	0	0	0	2.06	1.21	0.9	1.31	0.58	1.6	12	12	12	17	17	17	2.10204	0.742909	1.26042	0.231442	0.9	-0.105361	1.32323	0.280077	0.604167	-0.503905	1.56863	0.450201
274189	32	40	0	1	0	0	20.3402	0	0	1	1	0	0	0	0	0	0	1	0	0	0	1.27	0.42	0.8	1.27	0.57	0.85	13	13	13	17	17	17	1.29592	0.25922	0.4375	-0.826679	0.8	-0.223144	1.28283	0.249067	0.59375	-0.521297	0.833333	-0.182322
220135	28	39	0	1	0	0	21.0077	0	1	0	1	0	0	0	0	0	0	0	0	0	0	1.21	0.9	1.1	0.53	0.95	1.16	12	12	12	16	16	16	1.23469	0.210823	0.9375	-0.0645385	1.1	0.0953102	0.535354	-0.624828	0.959596	-0.041243	1.14851	0.13847
273110	26	39	1	1	0	1	17.0806	0	0	1	1	0	0	0	0	0	0	0	0	0	0	1.65	1	1	0.55	0.43	1.11	12	12	12	15	15	15	1.68367	0.520978	1.04167	0.040822	1	0	0.55	-0.597837	0.413462	-0.883191	1.13265	0.124563
274263	26	39	1	1	1	1	17.5294	0	0	1	1	0	0	0	0	0	0	0	0	0	0	0.97	0.54	0.7	1.62	0.51	1.66	12	12	12	16	16	16	0.989796	-0.0102565	0.5625	-0.575364	0.7	-0.356675	1.63636	0.492476	0.515152	-0.663294	1.64356	0.496867
272084	30	38	0	1	1	1	22.9658	0	1	1	0	0	0	0	0	0	0	0	0	0	0	0.37	0.37	0.9	0.67	0.32	0.98	13	13	13	17	17	17	0.377551	-0.97405	0.385417	-0.95343	0.9	-0.105361	0.676768	-0.390427	0.333333	-1.09861	0.960784	-0.0400053
206181	26	41	0	1	1	0	21.2306	0	1	0	0	0	0	0	0	0	0	0	0	0	0	1.11	3.6	0.9	1.45	1.92	1.51	13	13	13	16	16	16	1.13265	0.124563	3.75	1.32176	0.9	-0.105361	1.46465	0.381614	1.93939	0.662376	1.49505	0.402159
266262	28	38	1	1	0	0	19.6506	0	0	1	1	0	0	0	0	0	0	0	0	0	0	0.78	2.06	1.3	0.85	1.43	0.88	11	11	11	15	15	15	0.821053	-0.197168	2.10204	0.742909	1.3	0.262364	0.85	-0.162519	1.375	0.318454	0.897959	-0.107631
274233	21	41	1	1	1	1	18.75	0	0	1	0	0	0	0	0	0	0	0	0	0	0	1.09	1.8	1.1	0.65	0.99	1.01	13	13	13	17	17	17	1.11224	0.10638	1.875	0.628609	1.1	0.0953102	0.656566	-0.420733	1.03125	0.0307717	0.990196	-0.0098523
274748	43	38	0	1	0	0	26.6667	0	1	0	0	0	0	0	0	0	0	1	0	0	0	1.2	0.83	0.8	1.12	1.02	1.18	12	12	12	17	17	17	1.22449	0.202524	0.864583	-0.145508	0.8	-0.223144	1.13131	0.123379	1.0625	0.0606246	1.15686	0.145712
274764	27	41	1	1	1	1	21.0938	0	0	1	0	0	0	0	0	0	0	0	0	0	0	1.31	1.37	0.9	0.98	1.19	1.47	12	12	12	16	16	16	1.33673	0.29023	1.42708	0.355633	0.9	-0.105361	0.989899	-0.0101524	1.20202	0.184004	1.45545	0.375312
274766	36	37	1	1	1	1	19.8509	0	1	0	0	0	0	0	0	0	0	0	0	0	0	0.86	1	1	0.72	1.08	0.79	12	12	12	17	17	17	0.877551	-0.13062	1.04167	0.040822	1	0	0.727273	-0.318454	1.125	0.117783	0.77451	-0.255525
274869	29	39	0	1	1	1	22.5	0	0	1	1	0	0	0	0	0	0	0	0	0	0	1.16	0.88	0.8	0.85	1.67	1.15	12	12	12	16	16	16	1.18367	0.168623	0.916667	-0.0870114	0.8	-0.223144	0.858586	-0.152469	1.68687	0.522874	1.13861	0.129812
152162	29	41	0	1	0	0	19.1887	0	0	1	0	0	0	0	1	0	0	0	0	0	0	1.94	0.35	0.7	0.83	0.39	1.08	12	12	12	17	17	17	1.97959	0.682891	0.364583	-1.009	0.7	-0.356675	0.838384	-0.176279	0.40625	-0.900787	1.05882	0.0571584
274553	28	37	1	1	1	1	21.2561	0	0	0	0	0	0	0	0	0	0	0	0	0	0	1.92	1.06	1.3	0.64	0.93	0.69	12	12	12	16	16	16	1.95918	0.672528	1.10417	0.0990909	1.3	0.262364	0.646465	-0.436237	0.939394	-0.0625204	0.683168	-0.381014
53903	32	39	0	1	0	0	18.8271	0	1	1	1	0	0	0	0	0	0	0	0	1	0	0.88	1.52	0.6	0.74	0.99	1.07	12	12	12	16	16	16	0.897959	-0.107631	1.58333	0.459532	0.6	-0.510826	0.747475	-0.291055	1	0	1.05941	0.0577083
274576	24	39	0	1	0	0	22.7732	0	0	0	0	0	0	0	0	0	0	0	0	0	0	1.72	2.57	1	1.36	3.24	1.04	13	13	13	16	16	16	1.7551	0.562527	2.67708	0.984728	1	0	1.37374	0.317535	3.27273	1.18562	1.0297	0.0292704
221455	28	39	1	1	0	1	22.2222	0	1	1	1	0	0	0	0	0	0	0	0	0	0	0.99	0.4	1.1	0.63	0.27	1.26	12	12	12	16	16	16	1.0102	0.0101524	0.416667	-0.875469	1.1	0.0953102	0.636364	-0.451985	0.272727	-1.29928	1.24752	0.221161
274666	28	40	1	0	1	1	20.9366	0	1	0	0	0	0	0	0	0	0	0	0	0	0	2.72	1.07	1.3	1.24	1.38	1.47	13	13	13	17	17	17	2.77551	1.02083	1.11458	0.108481	1.3	0.262364	1.25253	0.225162	1.4375	0.362905	1.44118	0.36546
166800	34	39	1	1	1	0	21.5645	0	1	0	0	0	0	0	0	0	0	0	0	0	0	0.67	1.25	0.7	0.81	1.45	1.02	13	13	13	17	17	17	0.683673	-0.380275	1.30208	0.263966	0.7	-0.356675	0.818182	-0.200671	1.51042	0.412386	1	0
172786	29	39	1	1	1	1	23.0469	0	1	0	1	0	0	0	0	1	0	1	0	0	0	0.88	2.15	1.2	1.31	0.9	0.95	13	13	13	17	17	17	0.897959	-0.107631	2.23958	0.80629	1.2	0.182322	1.32323	0.280077	0.9375	-0.0645385	0.931373	-0.0710959
274708	31	41	1	1	1	0	21.1023	0	0	1	1	0	0	0	0	0	0	0	0	1	0	0.76	0.55	1.2	1.7	0.72	1.63	12	12	12	16	16	16	0.77551	-0.254234	0.572917	-0.557015	1.2	0.182322	1.71717	0.540679	0.727273	-0.318454	1.61386	0.47863
273708	35	40	1	1	1	1	22.3133	0	1	0	0	0	0	0	0	0	0	1	0	0	0	1.06	1.05	1.2	1.49	0.78	0.93	13	13	13	16	16	16	1.08163	0.0784716	1.09375	0.0896122	1.2	0.182322	1.50505	0.408826	0.787879	-0.238411	0.920792	-0.082521
273767	23	40	1	1	0	0	20.0184	0	0	0	1	0	0	0	0	0	0	0	0	0	0	1.23	0.66	1.3	0.91	0.63	1.06	12	12	12	17	17	17	1.2551	0.227217	0.6875	-0.374693	1.3	0.262364	0.919192	-0.0842603	0.65625	-0.421213	1.03922	0.0384663
169866	33	39	0	1	1	1	20.5693	0	1	1	0	0	0	0	0	1	0	1	0	0	0	1.42	4.22	0.7	0.85	4.67	0.83	13	13	13	17	17	17	1.44898	0.37086	4.39583	1.48066	0.7	-0.356675	0.858586	-0.152469	4.86458	1.58198	0.813725	-0.206132
273941	20	39	1	1	0	0	17.879	0	0	0	1	0	0	0	0	0	0	0	0	0	0	1.95	0.55	0.7	0.83	0.39	1	12	12	12	17	17	17	1.9898	0.688032	0.572917	-0.557015	0.7	-0.356675	0.838384	-0.176279	0.40625	-0.900787	0.980392	-0.0198026
272786	27	38	1	1	0	0	21.4844	0	1	0	0	0	0	0	0	0	0	1	0	0	0	0.53	1.02	1.3	0.51	1.31	1.03	13	13	13	17	17	17	0.540816	-0.614676	1.0625	0.0606246	1.3	0.262364	0.515152	-0.663294	1.36458	0.310849	1.0098	0.00975617
272810	33	39	1	1	1	0	21.4844	0	1	0	0	0	0	0	0	0	0	0	0	0	0	1.47	0.86	1.2	1.08	0.98	0.86	12	12	12	16	16	16	1.5	0.405465	0.895833	-0.110001	1.2	0.182322	1.09091	0.0870114	0.989899	-0.0101524	0.851485	-0.160773
272814	32	39	1	1	1	0	21.4844	0	1	0	0	0	0	0	0	0	0	1	0	0	0	1.74	0.5	1.4	0.78	0.67	0.02	13	13	13	17	17	17	1.77551	0.574088	0.520833	-0.652325	1.4	0.336472	0.787879	-0.238411	0.697917	-0.359656	0.0196078	-3.93183
273854	30	39	0	1	1	0	21.2183	0	0	1	1	0	0	0	0	0	0	1	0	0	0	1.74	1.15	0.9	0.61	0.8	0.95	12	12	12	16	16	16	1.77551	0.574088	1.19792	0.180584	0.9	-0.105361	0.616162	-0.484246	0.808081	-0.213093	0.940594	-0.0612436
273967	29	39	0	1	1	1	18.3655	0	0	0	0	0	0	0	0	0	0	0	0	0	0	0.71	0.63	1	1.23	0.56	1.23	12	12	12	16	16	16	0.72449	-0.322288	0.65625	-0.421213	1	0	1.24242	0.217065	0.565657	-0.569768	1.21782	0.197064
273281	23	39	1	1	1	1	21.4536	0	0	0	0	0	0	0	0	0	0	1	0	0	0	0.75	1.65	0.8	1.36	2.58	1.28	13	13	13	19	19	19	0.765306	-0.267479	1.71875	0.541597	0.8	-0.223144	1.37374	0.317535	2.63265	0.967992	1.23077	0.207639
274106	28	38	1	1	0	1	19.1467	0	0	0	0	0	0	0	0	0	0	0	0	0	0	0.68	1.08	1.1	1.47	1.82	0.9	13	13	13	17	17	17	0.693878	-0.36546	1.125	0.117783	1.1	0.0953102	1.48485	0.395313	1.89583	0.639658	0.882353	-0.125163
273489	35	39	1	1	0	1	24.974	0	1	0	0	0	0	0	0	0	0	0	0	0	0	1.23	0.9	1	0.76	1.09	0.57	13	13	13	18	18	18	1.2551	0.227217	0.9375	-0.0645385	1	0	0.767677	-0.264387	1.15957	0.148053	0.542857	-0.610909
261554	24	40	0	1	0	1	20.3567	0	0	0	0	0	0	0	0	0	0	1	0	0	0	1.69	1.12	0.9	0.73	0.87	1.37	13	13	13	17	17	17	1.72449	0.544931	1.16667	0.154151	0.9	-0.105361	0.737374	-0.30466	0.90625	-0.0984401	1.34314	0.295008
274333	28	40	1	1	1	1	22.6757	0	0	1	0	0	0	0	0	0	0	0	0	0	0	1.54	1.38	1.2	1.34	2.58	0.97	12	12	12	16	16	16	1.57143	0.451985	1.4375	0.362905	1.2	0.182322	1.35354	0.30272	2.60606	0.95784	0.960396	-0.0404095
210917	33	38	0	1	1	0	22.9591	0	1	0	0	0	0	0	0	0	0	1	0	0	0	0.67	0.94	0.9	1.28	1.02	1.02	12	12	12	16	16	16	0.683673	-0.380275	0.979167	-0.0210534	0.9	-0.105361	1.29293	0.25691	1.0303	0.029853	1.0099	0.0098523
273132	28	38	0	1	1	1	18.8189	0	0	0	0	0	0	0	0	0	0	0	0	0	0	0.77	1.18	0.7	0.74	1.88	0.85	12	12	12	16	16	16	0.785714	-0.241162	1.22917	0.206336	0.7	-0.356675	0.747475	-0.291055	1.89899	0.641322	0.841584	-0.172469
273157	27	39	1	0	0	0	22.3133	0	0	0	0	0	0	0	0	0	0	0	0	0	0	1.61	1.44	1.5	0.88	0.99	1.41	12	12	12	16	16	16	1.64286	0.496437	1.5	0.405465	1.5	0.405465	0.888889	-0.117783	1	0	1.39604	0.333639
273179	33	40	1	1	1	0	22.7615	0	0	1	0	0	0	0	0	0	0	0	0	0	0	1.47	0.87	0.9	0.59	0.81	0.85	12	12	12	18	18	18	1.5	0.405465	0.90625	-0.0984401	0.9	-0.105361	0.59596	-0.517582	0.861702	-0.148846	0.809524	-0.211309
177339	30	37	1	1	1	0	20.3244	0	1	0	0	0	0	0	0	0	0	0	0	0	0	1.08	0.71	0.9	0.97	0.64	1.42	13	13	13	17	17	17	1.10204	0.0971637	0.739583	-0.301668	0.9	-0.105361	0.979798	-0.0204089	0.666667	-0.405465	1.39216	0.330854
274920	32	38	1	1	1	1	21.5645	0	0	0	0	0	0	0	0	0	0	1	0	0	0	1.63	1.15	0.8	1.31	2.24	1	13	13	13	17	17	17	1.66327	0.508783	1.19792	0.180584	0.8	-0.223144	1.32323	0.280077	2.33333	0.847298	0.980392	-0.0198026
274927	31	39	0	1	1	1	20.3954	0	1	0	0	0	0	0	0	0	0	0	0	0	0	0.34	1.14	0.9	0.9	1.13	0.91	12	12	12	16	16	16	0.346939	-1.05861	1.1875	0.17185	0.9	-0.105361	0.909091	-0.0953102	1.14141	0.132268	0.90099	-0.104261
274934	29	39	1	1	1	1	18.9619	0	1	1	0	0	0	0	0	0	0	0	0	0	0	0.82	1.42	1.2	0.87	1.03	1.06	11	11	11	16	16	16	0.863158	-0.147158	1.44898	0.37086	1.2	0.182322	0.878788	-0.129212	1.0404	0.0396091	1.0495	0.0483186
274935	25	38	1	1	1	1	16.3847	0	0	0	0	0	0	0	0	0	0	0	0	0	0	1.98	0.58	1	1.04	0.82	1.21	13	13	13	17	17	17	2.02041	0.7033	0.604167	-0.503905	1	0	1.05051	0.049271	0.854167	-0.157629	1.18627	0.170818
274587	33	39	1	1	1	1	21.3226	0	1	0	0	0	0	0	0	0	0	0	0	0	0	1.01	1.13	1.4	0.95	1	0.99	13	13	13	17	17	17	1.03061	0.030153	1.17708	0.16304	1.4	0.336472	0.959596	-0.041243	1.04167	0.040822	0.970588	-0.029853
274618	29	38	1	1	1	1	17.4638	0	1	0	1	0	0	0	0	1	0	0	0	0	0	0.64	0.81	1.1	0.93	0.51	1.18	13	13	13	17	17	17	0.653061	-0.426084	0.84375	-0.169899	1.1	0.0953102	0.939394	-0.0625204	0.53125	-0.632523	1.15686	0.145712
197601	34	39	0	1	1	1	19.0965	0	1	0	0	0	0	0	0	1	0	0	0	0	0	2.2	2.59	1.4	1.05	1.63	1.18	13	13	13	18	18	18	2.2449	0.80866	2.69792	0.99248	1.4	0.336472	1.06061	0.0588405	1.73404	0.550455	1.12381	0.116724
274656	32	38	1	1	1	1	16.1616	0	1	0	0	0	0	0	0	0	0	0	0	0	0	1.32	1.22	0.8	0.84	1.12	1	12	12	12	17	17	17	1.34694	0.297834	1.27083	0.239673	0.8	-0.223144	0.848485	-0.164303	1.16667	0.154151	0.980392	-0.0198026
203868	26	38	1	1	0	0	17.5016	0	0	1	1	0	0	0	0	0	0	0	0	0	0	1.96	1.3	1	1.11	1.1	1.51	12	12	12	17	17	17	2	0.693147	1.35417	0.303186	1	0	1.12121	0.11441	1.14583	0.136132	1.48039	0.392307
274729	25	41	1	1	1	1	19.5312	0	0	0	0	0	0	0	0	0	0	0	0	0	0	2.84	2.02	0.6	0.61	1.22	0.73	13	13	13	17	17	17	2.89796	1.06401	2.10417	0.74392	0.6	-0.510826	0.616162	-0.484246	1.27083	0.239673	0.715686	-0.334513
134592	37	39	1	1	1	1	19.8189	0	1	1	1	0	0	0	0	0	0	0	0	0	0	0.44	0.43	1.2	0.75	0.69	1.74	14	14	14	21	21	21	0.419048	-0.869771	0.462366	-0.771399	1.2	0.182322	0.731707	-0.312375	0.762431	-0.271243	1.57466	0.45404
274787	24	40	0	1	1	0	21.3039	0	0	0	1	0	0	0	0	0	0	0	0	0	0	0.88	1.16	0.8	0.93	0.76	1.02	12	12	12	16	16	16	0.897959	-0.107631	1.20833	0.189242	0.8	-0.223144	0.939394	-0.0625204	0.767677	-0.264387	1.0099	0.0098523
273104	29	39	1	1	1	1	21.9289	0	1	1	1	0	0	0	0	0	0	0	0	0	0	2.01	2.76	1.1	1.36	1.17	1.13	12	12	12	16	16	16	2.05102	0.718337	2.875	1.05605	1.1	0.0953102	1.37374	0.317535	1.18182	0.167054	1.11881	0.112267
274816	23	39	1	1	1	0	19.433	0	0	1	0	0	0	0	0	0	0	0	0	0	0	1.46	1.84	0.7	0.59	2.36	0.96	12	12	12	19	19	19	1.4898	0.398639	1.91667	0.650588	0.7	-0.356675	0.59596	-0.517582	2.40816	0.878864	0.923077	-0.0800427
274134	30	39	1	1	1	1	20.0287	0	0	0	0	0	0	0	0	0	0	0	0	0	0	0.74	1.57	0.9	1.06	1.39	1.22	12	12	12	16	16	16	0.755102	-0.280902	1.63542	0.491898	0.9	-0.105361	1.07071	0.0683192	1.40404	0.339354	1.20792	0.188901
274147	27	40	0	1	1	1	21.4536	0	0	1	1	0	0	0	0	0	0	0	0	0	0	1.53	1.95	1.2	0.91	1.26	1.2	12	12	12	16	16	16	1.56122	0.44547	2.03125	0.708651	1.2	0.182322	0.919192	-0.0842603	1.27273	0.241162	1.18812	0.172371
148825	32	40	1	1	1	1	19.2336	0	1	0	1	0	0	0	0	0	0	0	0	0	0	1.43	0.65	0.9	1.16	0.35	1.09	12	12	12	16	16	16	1.45918	0.377877	0.677083	-0.389961	0.9	-0.105361	1.17172	0.15847	0.353535	-1.03977	1.07921	0.0762274
274203	31	39	1	1	1	0	20.9572	0	1	0	1	0	0	0	0	0	0	0	0	0	0	0.72	0.75	1.3	1.4	0.81	1.22	12	12	12	18	18	18	0.734694	-0.308301	0.78125	-0.24686	1.3	0.262364	1.41414	0.346523	0.861702	-0.148846	1.1619	0.150061
274225	33	39	1	1	1	1	21.9237	0	0	0	0	0	0	0	0	0	0	1	0	1	0	0.42	1.66	0.9	1.62	1.97	1.35	12	12	12	17	17	17	0.428571	-0.847298	1.72917	0.54764	0.9	-0.105361	1.63636	0.492476	2.05208	0.718856	1.32353	0.280302
186445	30	39	1	1	1	1	19.2164	0	1	0	0	0	0	0	0	0	0	0	0	0	0	0.7	0.69	0.9	0.94	0.73	0.97	12	12	12	16	16	16	0.714286	-0.336472	0.71875	-0.330242	0.9	-0.105361	0.949495	-0.0518251	0.737374	-0.30466	0.960396	-0.0404095
270995	31	40	0	1	1	0	21.7784	0	0	0	0	0	0	0	0	0	0	0	0	0	0	0.47	1.06	0.7	0.81	1	1.31	13	13	13	17	17	17	0.479592	-0.73482	1.10417	0.0990909	0.7	-0.356675	0.818182	-0.200671	1.04167	0.040822	1.28431	0.250225
216576	29	40	1	1	1	1	22.4273	0	1	0	0	0	0	0	0	0	0	0	0	0	0	0.6	1.61	1.3	0.79	0.77	0.97	13	13	13	18	18	18	0.612245	-0.490623	1.67708	0.517056	1.3	0.262364	0.79798	-0.225672	0.819149	-0.199489	0.92381	-0.0792494
273979	29	40	1	1	1	0	20.4382	0	0	0	0	0	0	0	0	0	0	0	0	1	0	0.42	0.77	0.8	1.44	1.14	0.85	12	12	12	16	16	16	0.428571	-0.847298	0.802083	-0.220543	0.8	-0.223144	1.45455	0.374693	1.15152	0.141079	0.841584	-0.172469
273995	32	33	0	1	1	1	22.0703	0	0	1	1	1	1	1	1	0	0	1	0	0	0	0.92	0.37	1.2	0.53	0.29	1.06	12	12	12	16	16	16	0.938776	-0.0631789	0.385417	-0.95343	1.2	0.182322	0.535354	-0.624828	0.292929	-1.22782	1.0495	0.0483186
274018	26	39	1	1	1	1	21.7784	0	0	0	0	0	0	0	0	0	0	0	0	0	0	0.97	1.45	1.2	0.91	2.03	1.6	13	13	13	17	17	17	0.989796	-0.0102565	1.51042	0.412386	1.2	0.182322	0.919192	-0.0842603	2.11458	0.748858	1.56863	0.450201
274047	27	38	1	1	0	0	20.8889	0	1	0	1	0	0	0	0	0	0	0	0	0	0	1.56	0.59	0.7	0.72	0.92	1.25	12	12	12	20	20	20	1.59184	0.464889	0.614583	-0.486811	0.7	-0.356675	0.712871	-0.338454	1	0	1.16822	0.155485
180325	32	38	1	1	1	0	17.3134	0	1	0	0	0	0	0	0	0	0	0	0	0	0	1.64	1.7	1.1	0.93	0.69	1.45	12	12	12	16	16	16	1.67347	0.514899	1.77083	0.57145	1.1	0.0953102	0.939394	-0.0625204	0.69697	-0.361013	1.43564	0.361613
273113	28	38	0	1	1	0	20.202	0	0	0	0	0	0	0	0	0	0	1	0	0	0	1.19	1.16	0.6	1.32	1.31	1.29	12	12	12	16	16	16	1.21429	0.194156	1.20833	0.189242	0.6	-0.510826	1.33333	0.287682	1.32323	0.280077	1.27723	0.244692
281958	30	38	1	1	1	1	17.9688	0	1	0	1	0	0	0	0	0	0	0	0	0	0	1.03	1.44	0.7	0.89	1.2	1.22	12	12	12	16	16	16	1.05102	0.0497615	1.5	0.405465	0.7	-0.356675	0.89899	-0.106483	1.21212	0.192372	1.20792	0.188901
160044	29	39	1	1	1	1	24.0886	0	0	1	1	0	0	0	0	0	0	0	0	0	0	1.63	0.41	1.3	0.74	0.32	1.72	12	12	12	16	16	16	1.66327	0.508783	0.427083	-0.850776	1.3	0.262364	0.747475	-0.291055	0.323232	-1.12938	1.70297	0.532374
282055	28	40	0	1	0	0	20.0288	0	1	0	0	0	0	0	0	0	0	0	0	0	0	0.75	1.87	1.2	1.05	1.52	1.03	12	12	12	16	16	16	0.765306	-0.267479	1.94792	0.66676	1.2	0.182322	1.06061	0.0588405	1.53535	0.428761	1.0198	0.0196085
186212	27	40	1	1	1	1	18.8677	0	1	0	1	0	0	0	0	0	0	0	0	0	0	1.6	0.97	1	1.06	0.6	1.4	11	11	11	16	16	16	1.68421	0.521297	0.989796	-0.0102565	1	0	1.07071	0.0683192	0.606061	-0.500775	1.38614	0.326522
281704	28	39	1	1	1	1	23.3399	0	0	0	1	0	0	0	0	0	0	1	0	0	0	0.7	1.14	0.8	1.17	3.49	0.96	12	12	12	16	16	16	0.714286	-0.336472	1.1875	0.17185	0.8	-0.223144	1.18182	0.167054	3.52525	1.25995	0.950495	-0.0507723
251217	22	40	1	1	0	1	21.1938	0	0	0	1	0	0	0	0	0	0	0	0	0	0	2.07	1.63	1.1	1.14	1.85	0.78	12	12	12	16	16	16	2.11224	0.747751	1.69792	0.529402	1.1	0.0953102	1.15152	0.141079	1.86869	0.625236	0.772277	-0.258412
280860	24	41	1	1	0	1	16.2331	0	0	0	0	0	0	0	0	0	0	0	0	0	0	1.03	0.91	1.1	0.97	0.69	1.54	13	13	13	17	17	17	1.05102	0.0497615	0.947917	-0.0534887	1.1	0.0953102	0.979798	-0.0204089	0.71875	-0.330242	1.5098	0.41198
280932	36	39	1	1	1	1	26.3465	0	1	0	0	0	0	0	0	0	0	1	0	0	0	0.46	0.48	1.1	1.06	0.39	1.65	13	13	13	17	17	17	0.469388	-0.756326	0.5	-0.693147	1.1	0.0953102	1.07071	0.0683192	0.40625	-0.900787	1.61765	0.480973
280944	33	39	0	1	1	0	22.1916	0	1	1	1	0	0	0	0	0	0	0	0	0	0	0.77	0.95	1.2	0.96	0.91	1.26	13	13	13	17	17	17	0.785714	-0.241162	0.989583	-0.0104713	1.2	0.182322	0.969697	-0.0307717	0.947917	-0.0534887	1.23529	0.211309
280373	28	36	0	1	1	1	20.9572	0	0	0	1	1	0	1	0	0	0	0	0	0	0	0.91	0.62	1.5	0.81	0.6	1.29	12	12	12	16	16	16	0.928571	-0.074108	0.645833	-0.437214	1.5	0.405465	0.818182	-0.200671	0.606061	-0.500775	1.27723	0.244692
203626	34	40	1	1	1	1	23.5556	0	1	0	0	0	0	0	0	1	0	0	0	0	0	0.47	0.65	0.9	0.81	0.57	1.41	13	13	13	17	17	17	0.479592	-0.73482	0.677083	-0.389961	0.9	-0.105361	0.818182	-0.200671	0.59375	-0.521297	1.38235	0.323787
282336	21	37	1	1	1	1	22.9803	0	0	1	0	0	0	0	0	0	0	0	0	0	0	0.73	1.44	0.9	1.59	2.06	1.41	12	12	12	17	17	17	0.744898	-0.294508	1.5	0.405465	0.9	-0.105361	1.60606	0.473784	2.14583	0.763528	1.38235	0.323787
199636	31	39	0	1	1	1	24.4646	0	1	0	0	0	0	0	0	0	0	1	0	0	0	1.73	1.61	1	0.87	1.6	1.17	13	13	13	18	18	18	1.76531	0.568324	1.67708	0.517056	1	0	0.878788	-0.129212	1.70213	0.531879	1.11429	0.108214
282381	30	39	1	1	0	0	20.83	1	1	1	1	0	0	0	0	0	0	0	0	0	0	1.28	0.78	1.1	0.97	0.97	1.04	13	13	13	17	17	17	1.30612	0.267063	0.8125	-0.207639	1.1	0.0953102	0.979798	-0.0204089	1.01042	0.0103628	1.01961	0.0194181
63953	32	36	1	1	1	1	23.7118	0	1	0	1	1	0	1	0	0	0	0	0	0	0	0.99	1.5	0.8	1.33	2.38	1.45	12	12	12	16	16	16	1.0102	0.0101524	1.5625	0.446287	0.8	-0.223144	1.34343	0.295229	2.40404	0.877151	1.43564	0.361613
276795	29	37	1	1	1	1	23.7827	0	1	0	0	0	0	0	0	1	0	0	0	0	0	1.57	1.1	0.8	1.11	1.23	1.44	12	12	12	16	16	16	1.60204	0.471278	1.14583	0.136132	0.8	-0.223144	1.12121	0.11441	1.24242	0.217065	1.42574	0.354693
281463	36	39	1	1	0	0	23.1111	0	1	0	1	0	0	0	0	0	0	1	0	0	0	0.73	0.35	1.2	0.98	0.24	1.31	13	13	13	17	17	17	0.744898	-0.294508	0.364583	-1.009	1.2	0.182322	0.989899	-0.0101524	0.25	-1.38629	1.28431	0.250225
281486	34	39	0	1	1	0	22.8624	0	1	0	1	0	0	0	0	1	0	1	0	0	0	1.04	0.73	0.8	0.86	1.15	0.83	13	13	13	18	18	18	1.06122	0.0594234	0.760417	-0.273889	0.8	-0.223144	0.868687	-0.140773	1.2234	0.201637	0.790476	-0.23512
139262	32	38	1	1	0	1	19.6752	0	1	0	0	0	0	0	0	0	0	0	0	0	0	0.64	0.66	0.9	1.36	1.24	1.03	13	13	13	18	18	18	0.653061	-0.426084	0.6875	-0.374693	0.9	-0.105361	1.37374	0.317535	1.31915	0.276987	0.980952	-0.0192314
281509	34	40	0	1	0	0	19.5312	0	0	0	0	0	0	0	0	0	0	0	0	0	0	0.93	0.4	0.7	0.77	0.58	1.17	12	12	12	16	16	16	0.94898	-0.052368	0.416667	-0.875469	0.7	-0.356675	0.777778	-0.251314	0.585859	-0.534677	1.15842	0.147053
130362	35	39	0	1	1	1	20.3954	0	1	1	0	0	0	0	0	1	0	1	0	0	0	0.52	1.08	0.9	0.95	1.21	1.24	12	12	12	17	17	17	0.530612	-0.633724	1.125	0.117783	0.9	-0.105361	0.959596	-0.041243	1.26042	0.231442	1.21569	0.195309
232807	36	40	1	1	1	1	23.5883	0	1	1	1	0	0	0	0	0	0	0	0	0	0	1.88	1.27	1.4	0.89	1.15	0.9	12	12	12	16	16	16	1.91837	0.651474	1.32292	0.279839	1.4	0.336472	0.89899	-0.106483	1.16162	0.149812	0.891089	-0.115311
280722	27	39	0	1	1	1	16.4474	0	1	0	0	0	0	0	0	0	0	0	0	0	0	1.44	1.41	1.2	1.21	1.98	1.42	13	13	13	17	17	17	1.46939	0.384846	1.46875	0.384412	1.2	0.182322	1.22222	0.200671	2.0625	0.723919	1.39216	0.330854
280729	32	39	1	1	0	1	21.7193	0	1	0	0	0	0	0	0	0	0	0	0	0	0	1.52	1.34	1.1	0.71	0.99	1.48	12	12	12	17	17	17	1.55102	0.438913	1.39583	0.333492	1.1	0.0953102	0.717172	-0.33244	1.03125	0.0307717	1.45098	0.372239
239855	28	41	1	1	0	1	16.8663	0	1	1	1	0	0	0	0	0	0	0	0	0	0	1.19	0.43	1	1.05	0.52	1.19	13	13	13	18	18	18	1.21429	0.194156	0.447917	-0.803148	1	0	1.06061	0.0588405	0.553191	-0.592051	1.13333	0.125163
280183	26	39	0	1	0	1	19.5799	0	0	1	1	0	0	0	0	0	0	0	0	0	0	1.03	0.55	0.8	0.74	0.42	1.15	11	11	11	16	16	16	1.08421	0.0808521	0.561224	-0.577634	0.8	-0.223144	0.747475	-0.291055	0.424242	-0.85745	1.13861	0.129812
280268	25	39	1	1	1	1	24.6334	0	0	1	1	0	0	0	0	0	0	0	0	1	0	1.1	1.13	0.8	1.56	1.12	0.9	13	13	13	17	17	17	1.12245	0.115513	1.17708	0.16304	0.8	-0.223144	1.57576	0.454736	1.16667	0.154151	0.882353	-0.125163
142044	34	39	0	1	1	1	19.1327	0	1	0	0	0	0	0	0	0	0	0	0	0	0	1.06	1.68	0.7	0.65	1.76	0.8	13	13	13	17	17	17	1.08163	0.0784716	1.75	0.559616	0.7	-0.356675	0.656566	-0.420733	1.83333	0.606136	0.784314	-0.242946
282298	24	40	1	1	1	0	19.7777	0	0	0	1	0	0	0	0	0	0	1	0	1	0	1.56	0.92	0.8	1.29	1.31	1.23	13	13	13	17	17	17	1.59184	0.464889	0.958333	-0.0425596	0.8	-0.223144	1.30303	0.264693	1.36458	0.310849	1.20588	0.187212
209569	29	40	0	1	0	0	22.1852	0	1	0	0	0	0	0	0	0	0	0	0	0	0	0.48	1.21	0.8	1.33	1.04	1.51	13	13	13	17	17	17	0.489796	-0.713766	1.26042	0.231442	0.8	-0.223144	1.34343	0.295229	1.08333	0.0800427	1.48039	0.392307
193938	33	40	1	1	1	1	19.2974	0	0	1	1	0	0	0	1	0	0	0	0	0	0	0.47	0.98	1	0.9	0.71	1.8	12	12	12	16	16	16	0.479592	-0.73482	1.02083	0.0206193	1	0	0.909091	-0.0953102	0.717172	-0.33244	1.78218	0.577836
283853	30	41	0	1	1	1	18.3594	0	0	0	0	0	0	0	0	0	0	0	0	0	0	1.16	3.64	1.1	1.1	1.8	0.94	13	13	13	17	17	17	1.18367	0.168623	3.79167	1.33281	1.1	0.0953102	1.11111	0.105361	1.875	0.628609	0.921569	-0.081678
283874	25	38	0	1	1	0	21.3382	0	0	0	1	0	0	0	0	0	0	0	0	0	0	1.5	2.21	1	0.83	1.96	1.04	12	12	12	17	17	17	1.53061	0.425668	2.30208	0.833815	1	0	0.838384	-0.176279	2.04167	0.713766	1.01961	0.0194181
280901	28	39	0	1	0	1	19.9293	0	1	1	1	0	0	0	0	1	0	0	0	0	0	1.8	1.95	0.9	1.5	1.79	1.61	13	13	13	17	17	17	1.83673	0.607989	2.03125	0.708651	0.9	-0.105361	1.51515	0.415515	1.86458	0.623038	1.57843	0.456432
173175	36	39	0	1	1	1	20.0288	0	0	1	1	0	0	0	0	1	0	0	0	0	0	1.23	1.08	1	0.99	1.28	0.78	13	13	13	17	17	17	1.2551	0.227217	1.125	0.117783	1	0	1	0	1.33333	0.287682	0.764706	-0.268264
280959	27	39	0	0	0	1	22.8928	0	0	0	1	0	0	0	0	0	0	1	0	0	0	0.88	1.18	0.9	1.32	0.79	1.51	13	13	13	17	17	17	0.897959	-0.107631	1.22917	0.206336	0.9	-0.105361	1.33333	0.287682	0.822917	-0.1949	1.48039	0.392307
283942	28	39	1	1	0	1	20.0288	0	1	0	1	0	0	0	0	0	0	0	0	0	0	0.71	0.93	1.1	0.91	1.63	1.11	12	12	12	16	16	16	0.72449	-0.322288	0.96875	-0.0317487	1.1	0.0953102	0.919192	-0.0842603	1.64646	0.49863	1.09901	0.0944097
200296	24	39	1	1	1	1	18.7305	0	1	1	1	0	0	0	0	0	0	0	0	0	0	0.92	0.91	1.4	1.38	1.41	0.71	12	12	12	16	16	16	0.938776	-0.0631789	0.947917	-0.0534887	1.4	0.336472	1.39394	0.332134	1.42424	0.35364	0.70297	-0.352441
283970	27	39	1	1	0	1	19.3962	0	0	0	0	0	0	0	0	0	0	0	0	0	0	1.01	0.27	1.1	1.16	0.29	1.51	12	12	12	16	16	16	1.03061	0.030153	0.28125	-1.26851	1.1	0.0953102	1.17172	0.15847	0.292929	-1.22782	1.49505	0.402159
281361	29	40	0	1	0	1	26.6728	0	0	0	0	0	0	0	1	0	0	0	0	0	0	2.34	1.03	0.9	1.3	2.09	1.21	11	11	11	16	16	16	2.46316	0.901444	1.05102	0.0497615	0.9	-0.105361	1.31313	0.272415	2.11111	0.747214	1.19802	0.18067
231630	24	40	1	1	0	0	19.7239	0	1	1	1	0	0	0	0	0	0	0	0	0	0	0.63	0.88	1.1	0.87	0.83	0.84	13	13	13	17	17	17	0.642857	-0.441833	0.916667	-0.0870114	1.1	0.0953102	0.878788	-0.129212	0.864583	-0.145508	0.823529	-0.194156
281919	28	39	1	0	1	1	17.782	0	0	1	1	0	0	0	0	0	0	0	0	0	0	1.03	0.99	1.1	1	0.94	0.98	12	12	12	16	16	16	1.05102	0.0497615	1.03125	0.0307717	1.1	0.0953102	1.0101	0.0100503	0.949495	-0.0518251	0.970297	-0.030153
282146	38	39	1	1	1	1	24.6548	0	1	1	1	0	0	0	0	1	0	0	0	0	0	0.66	1.57	1	0.64	0.79	0.86	13	13	13	17	17	17	0.673469	-0.395313	1.63542	0.491898	1	0	0.646465	-0.436237	0.822917	-0.1949	0.843137	-0.170626
278991	23	37	1	1	0	1	18.9745	0	0	0	0	0	0	0	0	0	0	1	0	0	0	0.62	0.19	1	0.5	0.2	0.69	13	13	13	18	18	18	0.632653	-0.457833	0.197917	-1.61991	1	0	0.505051	-0.683097	0.212766	-1.54756	0.657143	-0.419854
282218	29	39	0	1	1	1	21.7778	0	0	1	1	0	0	0	0	0	0	0	0	0	0	2.17	0.86	0.8	1.28	0.68	1.18	13	13	13	17	17	17	2.21429	0.79493	0.895833	-0.110001	0.8	-0.223144	1.29293	0.25691	0.708333	-0.34484	1.15686	0.145712
282248	28	41	1	1	1	1	19.2708	0	0	1	0	0	0	0	0	0	0	0	0	0	0	0.81	1.24	0.7	0.69	1.2	0.75	12	12	12	16	16	16	0.826531	-0.190518	1.29167	0.255933	0.7	-0.356675	0.69697	-0.361013	1.21212	0.192372	0.742574	-0.297632
281525	31	41	1	1	0	1	19.6936	0	1	0	1	0	0	0	0	0	0	0	0	0	0	0.69	0.38	1	0.98	0.49	1.17	11	11	11	15	15	15	0.726316	-0.31977	0.387755	-0.947381	1	0	0.98	-0.0202027	0.471154	-0.752571	1.19388	0.177206
204788	26	38	1	1	1	0	18.6593	0	1	1	1	0	0	0	0	0	0	0	0	0	0	0.64	0.93	1.8	1.03	1.32	1.03	12	12	12	15	15	15	0.653061	-0.426084	0.96875	-0.0317487	1.8	0.587787	1.03	0.0295588	1.26923	0.238411	1.05102	0.0497615
281602	33	38	0	0	1	0	20.7031	0	0	0	0	0	0	0	0	0	0	0	0	0	0	0.38	0.42	0.7	1.26	0.34	1.14	13	13	13	17	17	17	0.387755	-0.947381	0.4375	-0.826679	0.7	-0.356675	1.27273	0.241162	0.354167	-1.03799	1.11765	0.111226
281651	32	38	0	1	1	1	19.5511	0	0	0	0	0	0	0	0	0	0	0	0	0	0	1.8	1.03	1.3	1.19	1.07	0.89	12	12	12	16	16	16	1.83673	0.607989	1.07292	0.0703808	1.3	0.262364	1.20202	0.184004	1.08081	0.077709	0.881188	-0.126484
280747	29	38	1	1	0	1	22.9568	0	1	1	1	0	0	0	0	1	0	0	0	0	0	0.87	0.37	0.9	1.24	0.71	1.34	13	13	13	17	17	17	0.887755	-0.119059	0.385417	-0.95343	0.9	-0.105361	1.25253	0.225162	0.739583	-0.301668	1.31373	0.272867
280766	27	39	1	1	1	0	20.1951	0	0	0	0	0	0	0	0	0	0	0	0	0	0	1.18	1.03	0.7	1.43	0.79	1.48	12	12	12	16	16	16	1.20408	0.185717	1.07292	0.0703808	0.7	-0.356675	1.44444	0.367725	0.79798	-0.225672	1.46535	0.382092
96097	37	39	1	1	1	0	21.8522	0	1	1	0	0	0	0	0	1	0	0	0	0	0	1.85	1.2	1	1.2	0.63	1.35	12	12	12	17	17	17	1.88776	0.635388	1.25	0.223144	1	0	1.21212	0.192372	0.65625	-0.421213	1.32353	0.280302
280816	30	39	0	1	1	0	24.5089	0	1	1	0	0	0	0	0	0	0	1	0	0	0	0.99	1.67	0.8	1.36	2.06	0.87	12	12	12	16	16	16	1.0102	0.0101524	1.73958	0.553646	0.8	-0.223144	1.37374	0.317535	2.08081	0.732756	0.861386	-0.149212
280295	33	40	1	1	0	0	20.9625	0	1	0	0	0	0	0	0	0	0	0	0	0	0	0.75	0.61	1.1	1.05	0.49	1.19	13	13	13	17	17	17	0.765306	-0.267479	0.635417	-0.453474	1.1	0.0953102	1.06061	0.0588405	0.510417	-0.672528	1.16667	0.154151
250000	30	40	1	1	1	1	21.0938	0	1	1	0	0	0	0	0	0	0	0	0	0	0	0.76	1.05	1.1	0.91	0.73	1.24	12	12	12	17	17	17	0.77551	-0.254234	1.09375	0.0896122	1.1	0.0953102	0.919192	-0.0842603	0.760417	-0.273889	1.21569	0.195309
280319	26	40	0	1	0	0	19.3715	0	0	0	0	0	0	0	0	0	0	0	0	0	0	1.12	0.75	1	1	0.99	1.09	12	12	12	16	16	16	1.14286	0.133531	0.78125	-0.24686	1	0	1.0101	0.0100503	1	0	1.07921	0.0762274
280324	35	38	1	1	0	0	30.971	0	1	0	0	0	0	0	0	1	0	0	0	0	0	3.06	2.33	1.1	1.05	1.69	1.48	12	12	12	17	17	17	3.12245	1.13862	2.42708	0.88669	1.1	0.0953102	1.06061	0.0588405	1.76042	0.565551	1.45098	0.372239
282390	24	39	1	1	1	1	22.5466	0	0	0	0	0	0	0	0	0	0	0	0	0	0	1.07	0.79	1.1	1.03	0.87	1.12	12	12	12	16	16	16	1.09184	0.0878614	0.822917	-0.1949	1.1	0.0953102	1.0404	0.0396091	0.878788	-0.129212	1.10891	0.103378
123813	34	38	0	1	1	0	23.5304	0	1	1	1	0	0	0	0	1	0	0	0	0	0	1.12	1.25	1	0.91	1.15	1.25	12	12	12	16	16	16	1.14286	0.133531	1.30208	0.263966	1	0	0.919192	-0.0842603	1.16162	0.149812	1.23762	0.213193
282425	30	38	1	1	1	1	23.0112	0	0	0	0	0	0	0	0	0	0	0	0	0	0	1.22	0.73	0.8	1.63	0.85	1.45	13	13	13	16	16	16	1.2449	0.219054	0.760417	-0.273889	0.8	-0.223144	1.64646	0.49863	0.858586	-0.152469	1.43564	0.361613
282443	26	39	1	1	1	0	20.5611	0	0	0	0	0	0	0	1	0	0	0	0	0	0	3.94	0.88	0.8	1.84	0.7	1.6	11	11	11	16	16	16	4.14737	1.42247	0.897959	-0.107631	0.8	-0.223144	1.85859	0.619816	0.707071	-0.346625	1.58416	0.460053
281032	26	39	1	1	1	1	24.0346	0	1	1	0	0	0	0	0	1	0	0	0	0	0	0.82	0.46	1.2	1.26	0.27	0.99	14	14	14	18	18	18	0.780952	-0.247241	0.494624	-0.703958	1.2	0.182322	1.27273	0.241162	0.287234	-1.24746	0.942857	-0.0588405
145806	32	40	1	1	1	1	21.4844	0	1	0	0	0	0	0	0	0	0	1	0	0	0	1.14	0.34	0.9	0.99	0.58	1.36	13	13	13	17	17	17	1.16327	0.151231	0.354167	-1.03799	0.9	-0.105361	1	0	0.604167	-0.503905	1.33333	0.287682
270663	22	40	0	1	1	0	20.9643	0	0	0	1	0	0	0	0	0	0	0	0	0	0	2.27	0.75	1.1	1.17	0.88	0.9	13	13	13	18	18	18	2.31633	0.839983	0.78125	-0.24686	1.1	0.0953102	1.18182	0.167054	0.93617	-0.065958	0.857143	-0.154151
282451	26	39	1	1	1	1	21.7844	0	0	1	0	0	0	0	0	0	0	0	0	0	0	0.52	0.34	1.5	0.65	0.41	1.23	12	12	12	17	17	17	0.530612	-0.633724	0.354167	-1.03799	1.5	0.405465	0.656566	-0.420733	0.427083	-0.850776	1.20588	0.187212
166026	32	39	0	1	0	1	16.4366	0	1	0	0	0	0	0	0	0	0	0	0	0	0	0.95	3.01	1.4	0.64	2.96	1.05	12	12	12	16	16	16	0.969388	-0.0310906	3.13542	1.14276	1.4	0.336472	0.646465	-0.436237	2.9899	1.09524	1.0396	0.0388398
282462	31	39	0	1	1	1	20.1951	0	1	1	0	0	0	0	0	0	0	0	0	0	0	0.36	0.71	0.9	0.94	0.92	1.17	12	12	12	17	17	17	0.367347	-1.00145	0.739583	-0.301668	0.9	-0.105361	0.949495	-0.0518251	0.958333	-0.0425596	1.14706	0.137201
282470	33	38	1	1	0	0	19.8791	0	0	0	0	0	0	0	0	0	0	0	0	0	0	0.61	2.71	1.2	0.9	2.24	1.08	12	12	12	17	17	17	0.622449	-0.474094	2.82292	1.03777	1.2	0.182322	0.909091	-0.0953102	2.33333	0.847298	1.05882	0.0571584
281162	24	39	1	1	1	0	17.1468	0	0	1	1	0	0	0	0	0	0	0	0	0	0	1.33	0.83	0.9	0.6	1.03	1.05	13	13	13	17	17	17	1.35714	0.305382	0.864583	-0.145508	0.9	-0.105361	0.606061	-0.500775	1.07292	0.0703808	1.02941	0.0289875
166256	34	40	0	1	1	1	22.5827	0	1	1	0	0	0	0	0	0	0	1	0	0	0	1.03	0.8	0.8	0.56	0.6	1.12	12	12	12	16	16	16	1.05102	0.0497615	0.833333	-0.182322	0.8	-0.223144	0.565657	-0.569768	0.606061	-0.500775	1.10891	0.103378
281202	35	35	0	0	0	0	20.8933	0	0	0	0	1	0	1	0	0	0	1	0	1	0	0.85	1.55	0.6	0.87	1.23	1.01	11	11	11	15	15	15	0.894737	-0.111226	1.58163	0.458458	0.6	-0.510826	0.87	-0.139262	1.18269	0.167793	1.03061	0.030153
284103	27	41	1	1	0	1	21.6041	0	1	0	0	0	0	0	0	0	0	1	0	0	0	0.44	1.04	1.8	0.97	1.1	1.02	12	12	12	17	17	17	0.44898	-0.800778	1.08333	0.0800427	1.8	0.587787	0.979798	-0.0204089	1.14583	0.136132	1	0
271305	26	40	1	1	0	1	23.03	0	1	0	0	0	0	0	0	0	0	0	0	0	0	0.94	0.87	0.9	1.16	0.7	1.23	13	13	13	17	17	17	0.959184	-0.0416727	0.90625	-0.0984401	0.9	-0.105361	1.17172	0.15847	0.729167	-0.315853	1.20588	0.187212
284202	29	37	1	1	1	1	19.4734	0	0	1	1	0	0	0	0	0	0	0	0	0	0	1.39	0.82	1.1	1.24	0.73	1.86	13	13	13	17	17	17	1.41837	0.349506	0.854167	-0.157629	1.1	0.0953102	1.25253	0.225162	0.760417	-0.273889	1.82353	0.600774
284267	27	39	1	1	1	1	18.9036	0	0	0	0	0	0	0	0	0	0	0	0	0	0	0.48	2.57	1.1	0.59	4.81	1.06	13	13	13	17	17	17	0.489796	-0.713766	2.67708	0.984728	1.1	0.0953102	0.59596	-0.517582	5.01042	1.61152	1.03922	0.0384663
169556	29	39	1	1	1	1	20.7556	0	1	1	0	0	0	0	0	0	0	0	0	0	0	1.05	2.65	0.9	0.73	0.84	0.98	13	13	13	18	18	18	1.07143	0.0689929	2.76042	1.01538	0.9	-0.105361	0.737374	-0.30466	0.893617	-0.112478	0.933333	-0.0689929
274575	31	38	1	1	1	0	22.2908	0	1	1	1	0	0	0	0	0	0	0	0	0	0	0.8	0.78	0.8	0.74	0.59	1.24	13	13	13	17	17	17	0.816327	-0.202941	0.8125	-0.207639	0.8	-0.223144	0.747475	-0.291055	0.614583	-0.486811	1.21569	0.195309
157013	33	39	0	1	1	1	20.0288	0	1	0	0	0	0	0	0	0	0	0	0	0	0	0.91	0.88	0.7	0.73	1.23	1.04	13	13	13	17	17	17	0.928571	-0.074108	0.916667	-0.0870114	0.7	-0.356675	0.737374	-0.30466	1.28125	0.247836	1.01961	0.0194181
274394	30	38	1	1	1	1	19.052	0	0	1	1	0	0	0	0	0	0	0	0	0	0	0.65	0.29	0.7	1.17	0.34	0.79	11	11	11	15	15	15	0.684211	-0.37949	0.295918	-1.21767	0.7	-0.356675	1.17	0.157004	0.326923	-1.11803	0.806122	-0.21552
274396	28	40	0	0	1	0	19.8791	0	0	0	0	0	0	0	0	0	0	0	0	0	0	0.52	0.6	1.3	1.14	0.55	1.6	12	12	12	16	16	16	0.530612	-0.633724	0.625	-0.470004	1.3	0.262364	1.15152	0.141079	0.555556	-0.587787	1.58416	0.460053
272631	27	37	0	1	1	0	16.0231	0	0	1	0	0	0	0	0	0	0	0	0	0	0	0.56	1	0.9	0.68	0.86	1.95	13	13	13	17	17	17	0.571429	-0.559616	1.04167	0.040822	0.9	-0.105361	0.686869	-0.375612	0.895833	-0.110001	1.91176	0.648027
274468	32	40	1	1	1	1	19.9481	0	0	0	0	0	0	0	0	0	0	0	0	0	0	1.3	0.55	1.3	0.9	0.36	1.34	12	12	12	16	16	16	1.32653	0.282567	0.572917	-0.557015	1.3	0.262364	0.909091	-0.0953102	0.363636	-1.0116	1.32673	0.282719
273630	26	37	0	1	1	1	23.7118	0	0	0	0	0	0	0	0	0	0	1	0	0	0	1	0.39	0.8	0.82	0.44	0.92	13	13	13	17	17	17	1.02041	0.0202027	0.40625	-0.900787	0.8	-0.223144	0.828283	-0.188401	0.458333	-0.780159	0.901961	-0.103184
273658	16	38	1	1	0	0	17.3817	0	0	1	1	0	0	0	0	0	0	0	0	0	0	0.61	0.99	0.7	1.11	0.74	1.08	12	12	12	17	17	17	0.622449	-0.474094	1.03125	0.0307717	0.7	-0.356675	1.12121	0.11441	0.770833	-0.260283	1.05882	0.0571584
273664	23	40	1	1	0	1	17.9688	0	0	1	1	0	0	0	0	0	0	0	0	0	0	0.38	1.32	1.3	1.03	1.15	1.3	12	12	12	16	16	16	0.387755	-0.947381	1.375	0.318454	1.3	0.262364	1.0404	0.0396091	1.16162	0.149812	1.28713	0.252414
214475	28	38	1	1	0	0	27.852	0	1	0	0	0	0	0	0	0	0	0	0	0	0	0.6	1.54	1.3	0.95	1.26	0.96	14	14	14	17	17	17	0.571429	-0.559616	1.65591	0.504353	1.3	0.262364	0.959596	-0.041243	1.3125	0.271934	0.941176	-0.0606246
272476	31	37	1	1	1	1	24.1965	0	1	0	0	0	0	0	0	0	0	0	0	0	0	0.68	1.19	1	0.98	0.88	1.47	13	13	13	17	17	17	0.693878	-0.36546	1.23958	0.214775	1	0	0.989899	-0.0101524	0.916667	-0.0870114	1.44118	0.36546
87684	32	39	0	1	1	0	21.6311	0	1	0	0	0	0	0	0	0	0	0	0	0	0	0.89	0.91	0.8	1.18	0.89	0.99	12	12	12	17	17	17	0.908163	-0.0963311	0.947917	-0.0534887	0.8	-0.223144	1.19192	0.175565	0.927083	-0.0757118	0.970588	-0.029853
274482	32	38	0	0	0	1	19.3515	0	1	1	1	0	0	0	0	0	0	0	0	0	0	1.07	1.38	1.1	1.08	1.65	0.89	13	13	13	17	17	17	1.09184	0.0878614	1.4375	0.362905	1.1	0.0953102	1.09091	0.0870114	1.71875	0.541597	0.872549	-0.136336
232614	30	40	1	1	1	0	19.7239	0	1	0	0	0	0	0	0	0	0	0	0	0	0	1.64	1.68	0.8	0.63	0.78	0.86	12	12	12	16	16	16	1.67347	0.514899	1.75	0.559616	0.8	-0.223144	0.636364	-0.451985	0.787879	-0.238411	0.851485	-0.160773
222410	26	38	0	1	0	1	26.2724	0	1	0	0	0	0	0	0	0	0	0	0	0	0	0.88	0.27	1.3	1.2	0.29	1.28	13	13	13	17	17	17	0.897959	-0.107631	0.28125	-1.26851	1.3	0.262364	1.21212	0.192372	0.302083	-1.19705	1.2549	0.227057
274634	31	39	0	1	0	1	17.313	0	0	1	0	0	0	0	0	0	0	0	0	0	0	2.52	0.78	0.8	0.6	0.7	1.36	12	12	12	16	16	16	2.57143	0.944462	0.8125	-0.207639	0.8	-0.223144	0.606061	-0.500775	0.707071	-0.346625	1.34653	0.297534
274640	28	35	0	1	1	1	20.7967	0	0	0	0	1	0	1	0	0	0	0	0	0	0	1.31	0.94	0.8	0.79	1.15	0.84	12	12	12	16	16	16	1.33673	0.29023	0.979167	-0.0210534	0.8	-0.223144	0.79798	-0.225672	1.16162	0.149812	0.831683	-0.184304
274000	34	39	1	1	1	1	23.2377	0	0	1	1	0	0	0	0	0	0	1	0	0	0	0.82	0.89	0.8	1.16	1.41	0.89	12	12	12	16	16	16	0.836735	-0.178248	0.927083	-0.0757118	0.8	-0.223144	1.17172	0.15847	1.42424	0.35364	0.881188	-0.126484
133837	30	39	0	1	0	1	23.2254	0	1	1	1	0	0	0	0	0	0	0	0	0	0	4.37	0.53	1.2	1.31	0.6	1.32	12	12	12	16	16	16	4.45918	1.49497	0.552083	-0.594056	1.2	0.182322	1.32323	0.280077	0.606061	-0.500775	1.30693	0.267681
160919	33	38	0	1	1	0	19.433	0	1	0	0	0	0	0	0	0	0	0	0	0	0	1.22	1.69	1.3	1.19	1.65	0.91	12	12	12	15	15	15	1.2449	0.219054	1.76042	0.565551	1.3	0.262364	1.19	0.173953	1.58654	0.461555	0.928571	-0.074108
273014	25	37	0	1	0	1	20.061	0	0	0	1	0	0	0	0	0	0	1	0	0	0	1.19	0.24	1.4	1.23	0.39	1.55	13	13	13	17	17	17	1.21429	0.194156	0.25	-1.38629	1.4	0.336472	1.24242	0.217065	0.40625	-0.900787	1.51961	0.418452
232143	25	39	1	1	0	1	18.5901	0	1	0	1	0	0	0	0	0	0	0	0	0	0	0.85	1.6	0.9	0.81	1.93	1.18	12	12	12	16	16	16	0.867347	-0.142316	1.66667	0.510826	0.9	-0.105361	0.818182	-0.200671	1.94949	0.66757	1.16832	0.155564
272210	34	36	1	1	0	0	18.8189	0	0	0	0	1	0	1	0	0	0	0	0	0	0	0.38	0.85	0.8	1.72	0.89	0.87	13	13	13	17	17	17	0.387755	-0.947381	0.885417	-0.121697	0.8	-0.223144	1.73737	0.552375	0.927083	-0.0757118	0.852941	-0.159065
272271	33	34	0	1	1	1	25	0	0	1	0	1	0	1	0	0	0	1	0	0	0	0.85	0.75	0.9	0.66	0.71	1.18	12	12	12	17	17	17	0.867347	-0.142316	0.78125	-0.24686	0.9	-0.105361	0.666667	-0.405465	0.739583	-0.301668	1.15686	0.145712
139217	25	39	1	1	1	1	21.3599	0	1	0	1	0	0	0	0	0	0	0	0	0	0	2.34	1.21	1.4	0.79	1.38	1.1	14	14	14	18	18	18	2.22857	0.801361	1.30108	0.263191	1.4	0.336472	0.79798	-0.225672	1.46809	0.383959	1.04762	0.04652
272117	27	40	1	1	1	0	21.2279	0	0	0	0	0	0	0	0	0	0	0	0	0	0	0.52	0.34	0.8	1.46	0.61	1.19	12	12	12	16	16	16	0.530612	-0.633724	0.354167	-1.03799	0.8	-0.223144	1.47475	0.388487	0.616162	-0.484246	1.17822	0.164003
273506	26	37	1	1	1	1	20.2291	0	0	0	0	0	0	0	0	0	0	0	0	1	1	3.95	0.84	0.9	0.94	1.18	1.05	12	12	12	17	17	17	4.03061	1.39392	0.875	-0.133531	0.9	-0.105361	0.949495	-0.0518251	1.22917	0.206336	1.02941	0.0289875
273514	30	38	0	1	1	1	20.8117	0	0	1	1	0	0	0	0	0	0	1	0	0	0	0.51	0.68	0.8	1.38	1.28	0.99	12	12	12	18	18	18	0.520408	-0.653142	0.708333	-0.34484	0.8	-0.223144	1.39394	0.332134	1.3617	0.308735	0.942857	-0.0588405
273561	25	38	0	1	1	1	19.3821	0	0	1	1	0	0	0	0	0	0	0	0	1	0	2.4	0.4	1.1	1.11	0.42	1.02	13	13	13	16	16	16	2.44898	0.895671	0.416667	-0.875469	1.1	0.0953102	1.12121	0.11441	0.424242	-0.85745	1.0099	0.0098523
272670	28	40	0	1	0	1	20.1873	0	1	1	1	0	0	0	0	0	0	0	0	0	0	1.09	1.12	1.4	0.93	1.23	1.22	13	13	13	18	18	18	1.11224	0.10638	1.16667	0.154151	1.4	0.336472	0.939394	-0.0625204	1.30851	0.26889	1.1619	0.150061
273627	23	39	1	1	1	1	18.9036	0	0	0	0	0	0	0	0	0	0	0	0	0	0	0.27	0.61	0.5	1.08	0.64	1.14	12	12	12	17	17	17	0.27551	-1.28913	0.635417	-0.453474	0.5	-0.693147	1.09091	0.0870114	0.666667	-0.405465	1.11765	0.111226
274120	27	39	0	1	1	1	21.7784	0	1	1	1	0	0	0	0	1	0	0	0	0	0	2.07	1.28	1.4	0.93	1.84	1.31	13	13	13	18	18	18	2.11224	0.747751	1.33333	0.287682	1.4	0.336472	0.939394	-0.0625204	1.95745	0.671641	1.24762	0.221237
261749	28	37	0	1	0	1	24.9199	0	0	1	1	0	0	0	0	0	0	0	1	0	0	0.97	0.66	1	0.81	0.79	1.08	13	13	13	17	17	17	0.989796	-0.0102565	0.6875	-0.374693	1	0	0.818182	-0.200671	0.822917	-0.1949	1.05882	0.0571584
274133	26	38	0	1	1	1	18.8271	0	0	0	0	0	0	0	0	0	0	1	0	0	0	0.63	1.98	0.9	1.01	2.71	0.95	13	13	13	17	17	17	0.642857	-0.441833	2.0625	0.723919	0.9	-0.105361	1.0202	0.0200007	2.82292	1.03777	0.931373	-0.0710959
274141	29	39	0	1	1	1	17.7778	0	0	0	0	0	0	0	0	0	0	0	0	0	0	1.67	0.85	1.1	1.46	0.95	1.38	14	14	14	18	18	18	1.59048	0.464033	0.913978	-0.0899482	1.1	0.0953102	1.47475	0.388487	1.01064	0.0105821	1.31429	0.273293
271227	24	40	1	1	1	0	22.8624	0	0	0	0	0	0	0	0	0	0	0	0	0	0	1.1	0.5	1.3	1.14	0.67	1.11	12	12	12	16	16	16	1.12245	0.115513	0.520833	-0.652325	1.3	0.262364	1.15152	0.141079	0.676768	-0.390427	1.09901	0.0944097
135799	29	39	0	1	0	0	22.8329	0	1	0	0	0	0	0	0	0	0	1	0	0	0	0.64	0.37	1	1.23	0.34	1.51	13	13	13	18	18	18	0.653061	-0.426084	0.385417	-0.95343	1	0	1.24242	0.217065	0.361702	-1.01693	1.4381	0.363319
242961	32	40	0	1	1	0	20.0288	0	1	0	0	0	0	0	0	0	0	0	0	0	0	0.78	1.09	0.8	0.89	0.79	1.28	13	13	13	18	18	18	0.795918	-0.228259	1.13542	0.127	0.8	-0.223144	0.89899	-0.106483	0.840426	-0.173847	1.21905	0.19807
272683	28	38	0	1	1	0	21.0498	0	0	0	0	0	0	0	0	0	0	0	0	0	0	0.22	0.67	0.8	1.76	0.88	1.17	12	12	12	16	16	16	0.22449	-1.49393	0.697917	-0.359656	0.8	-0.223144	1.77778	0.575364	0.888889	-0.117783	1.15842	0.147053
274425	27	39	0	1	1	1	22.4323	0	0	1	0	0	0	0	0	0	0	0	0	0	0	1.01	1.1	1	1.01	0.81	0.93	12	12	12	17	17	17	1.03061	0.030153	1.14583	0.136132	1	0	1.0202	0.0200007	0.84375	-0.169899	0.911765	-0.0923733
224882	27	37	1	1	0	1	17.6693	0	1	0	1	0	0	0	0	0	0	0	0	0	0	0.7	1.25	0.5	0.99	0.98	1.07	13	13	13	17	17	17	0.714286	-0.336472	1.30208	0.263966	0.5	-0.693147	1	0	1.02083	0.0206193	1.04902	0.047856
274452	34	39	0	1	0	1	18.4265	0	1	0	1	0	0	0	0	0	0	1	0	0	0	0.54	0.8	0.9	0.66	0.95	1.1	12	12	12	18	18	18	0.55102	-0.595983	0.833333	-0.182322	0.9	-0.105361	0.666667	-0.405465	1.01064	0.0105821	1.04762	0.04652
273199	25	38	1	1	0	1	27.4714	0	0	1	0	0	0	0	0	0	0	1	0	0	0	1.8	0.76	0.8	0.71	0.6	1.12	12	12	12	16	16	16	1.83673	0.607989	0.791667	-0.233615	0.8	-0.223144	0.717172	-0.33244	0.606061	-0.500775	1.10891	0.103378
263958	27	37	0	1	0	1	16.5607	0	1	1	1	0	0	0	0	0	0	0	0	0	0	1.48	0.77	0.9	1.59	0.71	0.94	13	13	13	17	17	17	1.5102	0.412245	0.802083	-0.220543	0.9	-0.105361	1.60606	0.473784	0.739583	-0.301668	0.921569	-0.081678
274149	28	39	0	1	1	1	22.4813	0	0	0	0	0	0	0	0	0	0	0	0	0	0	1.6	1.06	1.1	0.66	1.25	0.9	11	11	11	15	15	15	1.68421	0.521297	1.08163	0.0784716	1.1	0.0953102	0.66	-0.415515	1.20192	0.183923	0.918367	-0.0851578
274199	30	39	1	1	1	1	23.1302	0	1	1	1	0	0	0	0	0	0	0	0	0	0	1.39	0.38	1	1.42	0.49	1.36	13	13	13	17	17	17	1.41837	0.349506	0.395833	-0.926762	1	0	1.43434	0.360707	0.510417	-0.672528	1.33333	0.287682
271535	29	40	0	1	1	0	17.898	0	0	1	0	0	0	0	0	0	0	0	0	0	0	1.81	0.5	1.1	0.88	0.43	1.21	14	14	14	18	18	18	1.72381	0.544537	0.537634	-0.620576	1.1	0.0953102	0.888889	-0.117783	0.457447	-0.782095	1.15238	0.14183
148001	35	37	1	1	1	1	20.8117	0	1	1	1	0	0	0	0	1	0	1	0	0	0	0.51	2.04	0.9	0.62	1.07	1.43	12	12	12	16	16	16	0.520408	-0.653142	2.125	0.753772	0.9	-0.105361	0.626263	-0.467985	1.08081	0.077709	1.41584	0.347724
274531	27	39	1	1	0	1	20.061	0	0	1	1	0	0	0	0	0	0	0	0	0	0	0.82	1.39	0.7	0.82	1.72	1.15	12	12	12	17	17	17	0.836735	-0.178248	1.44792	0.370126	0.7	-0.356675	0.828283	-0.188401	1.79167	0.583146	1.12745	0.119959
274275	24	37	1	1	0	0	18.6115	0	0	0	1	0	0	0	0	0	0	0	0	0	0	0.66	0.41	0.9	1.49	0.73	0.8	12	12	12	16	16	16	0.673469	-0.395313	0.427083	-0.850776	0.9	-0.105361	1.50505	0.408826	0.737374	-0.30466	0.792079	-0.233094
233189	27	40	1	1	1	1	19.7239	0	1	0	0	0	0	0	0	0	0	0	0	0	0	1.64	0.94	1.1	0.68	0.77	0.8	13	13	13	17	17	17	1.67347	0.514899	0.979167	-0.0210534	1.1	0.0953102	0.686869	-0.375612	0.802083	-0.220543	0.784314	-0.242946
203432	34	38	0	1	1	1	25.5588	0	1	1	1	0	0	0	0	0	0	0	0	0	0	0.56	0.32	0.7	1.39	0.58	1.01	12	12	12	17	17	17	0.571429	-0.559616	0.333333	-1.09861	0.7	-0.356675	1.40404	0.339354	0.604167	-0.503905	0.990196	-0.0098523
222026	27	39	1	1	0	0	21.3593	0	1	0	0	0	0	0	0	0	0	1	0	0	0	1.11	1.47	1.3	0.99	1.59	0.93	13	13	13	17	17	17	1.13265	0.124563	1.53125	0.426084	1.3	0.262364	1	0	1.65625	0.504556	0.911765	-0.0923733
273511	39	38	1	1	1	1	24.0882	0	1	0	0	0	0	0	0	0	0	1	0	0	0	0.95	1.08	1.2	0.92	1.57	0.83	12	12	12	17	17	17	0.969388	-0.0310906	1.125	0.117783	1.2	0.182322	0.929293	-0.0733313	1.63542	0.491898	0.813725	-0.206132
273512	27	38	1	1	1	1	20.8325	0	0	1	1	0	0	0	0	0	0	1	0	0	0	0.88	1.84	1.2	1.06	3.46	0.65	12	12	12	16	16	16	0.897959	-0.107631	1.91667	0.650588	1.2	0.182322	1.07071	0.0683192	3.49495	1.25132	0.643564	-0.440733
179946	31	40	0	0	1	0	23.3091	0	1	0	0	0	0	0	0	0	0	0	0	0	0	1.05	1.2	0.9	1.02	0.91	0.79	12	12	12	16	16	16	1.07143	0.0689929	1.25	0.223144	0.9	-0.105361	1.0303	0.029853	0.919192	-0.0842603	0.782178	-0.245673
273580	27	38	0	1	1	0	20.7031	0	0	0	0	0	0	0	0	0	0	0	0	0	0	1.32	1.75	0.9	1.32	1.23	0.87	13	13	13	17	17	17	1.34694	0.297834	1.82292	0.600438	0.9	-0.105361	1.33333	0.287682	1.28125	0.247836	0.852941	-0.159065
273600	31	40	0	1	1	1	19.91	0	0	0	0	0	0	0	0	0	0	1	0	0	0	0.7	0.54	1.1	1.01	0.62	0.76	13	13	13	17	17	17	0.714286	-0.336472	0.5625	-0.575364	1.1	0.0953102	1.0202	0.0200007	0.645833	-0.437214	0.745098	-0.294239
193055	33	39	0	1	1	0	23.4339	0	1	0	0	0	0	0	0	0	0	1	0	0	0	1.29	0.74	0.6	0.74	0.55	1.35	12	12	12	17	17	17	1.31633	0.274845	0.770833	-0.260283	0.6	-0.510826	0.747475	-0.291055	0.572917	-0.557015	1.32353	0.280302
272373	30	40	0	1	1	0	18.7962	0	0	0	0	0	0	0	0	0	0	0	0	0	0	0.38	0.47	0.9	0.65	0.56	1.22	13	13	13	16	16	16	0.387755	-0.947381	0.489583	-0.714201	0.9	-0.105361	0.656566	-0.420733	0.565657	-0.569768	1.20792	0.188901
191158	26	39	1	1	0	0	21.0303	0	0	0	0	0	0	0	0	0	0	0	0	1	0	0.76	1.61	0.9	1.01	1.45	0.97	14	14	14	18	18	18	0.72381	-0.323227	1.73118	0.548805	0.9	-0.105361	1.0202	0.0200007	1.54255	0.433439	0.92381	-0.0792494
272398	26	34	1	1	1	1	18.75	0	0	0	0	1	0	1	0	0	0	0	0	0	0	0.56	3	0.9	0.6	1.94	0.63	12	12	12	16	16	16	0.571429	-0.559616	3.125	1.13943	0.9	-0.105361	0.606061	-0.500775	1.9596	0.672738	0.623762	-0.471986
272434	24	38	0	1	1	0	18.6012	0	0	0	0	0	0	0	0	0	0	0	0	0	0	0.77	0.76	0.9	1.4	1.1	1.12	14	14	14	18	18	18	0.733333	-0.310155	0.817204	-0.201866	0.9	-0.105361	1.41414	0.346523	1.17021	0.157186	1.06667	0.0645385
252818	23	39	0	1	1	1	19.0274	0	1	0	0	0	0	0	0	0	0	0	0	0	0	0.54	1.24	1	1.45	1.4	1.6	11	11	11	16	16	16	0.568421	-0.564893	1.26531	0.235314	1	0	1.46465	0.381614	1.41414	0.346523	1.58416	0.460053
273683	22	39	1	1	0	1	17.0392	0	0	1	0	0	0	0	0	0	0	0	0	0	0	0.92	0.83	1.2	1.08	1.1	1.11	12	12	12	17	17	17	0.938776	-0.0631789	0.864583	-0.145508	1.2	0.182322	1.09091	0.0870114	1.14583	0.136132	1.08824	0.0845574
246568	22	37	1	1	0	1	23.472	0	1	1	1	0	0	0	0	0	0	0	0	0	0	1.16	0.71	1.1	1.14	0.64	0.93	13	13	13	17	17	17	1.18367	0.168623	0.739583	-0.301668	1.1	0.0953102	1.15152	0.141079	0.666667	-0.405465	0.911765	-0.0923733
273727	31	39	1	1	1	1	22.6409	0	1	0	1	0	0	0	0	0	0	1	0	0	0	1.12	0.61	0.9	1.18	0.58	0.87	13	13	13	16	16	16	1.14286	0.133531	0.635417	-0.453474	0.9	-0.105361	1.19192	0.175565	0.585859	-0.534677	0.861386	-0.149212
274142	32	37	0	1	0	1	21.5019	0	0	0	0	0	0	0	0	0	0	0	0	0	0	2.11	1.01	0.7	1.09	1.02	1.22	12	12	12	17	17	17	2.15306	0.766891	1.05208	0.0507723	0.7	-0.356675	1.10101	0.096228	1.0625	0.0606246	1.19608	0.179048
274144	29	39	0	1	1	1	19.2277	0	0	0	1	0	0	0	0	0	0	0	0	0	0	1.39	0.6	1	0.96	0.53	1.18	12	12	12	17	17	17	1.41837	0.349506	0.625	-0.470004	1	0	0.969697	-0.0307717	0.552083	-0.594056	1.15686	0.145712
274146	25	38	0	1	1	1	21.6311	0	0	1	1	0	0	0	0	0	0	0	0	1	0	1.59	1.48	1.3	0.76	1.24	1.72	12	12	12	17	17	17	1.62245	0.483937	1.54167	0.432864	1.3	0.262364	0.767677	-0.264387	1.29167	0.255933	1.68627	0.522522
272794	29	39	0	1	1	0	19.5312	0	0	0	0	0	0	0	0	0	0	0	0	0	0	0.87	0.88	0.9	0.81	1.1	0.75	12	12	12	17	17	17	0.887755	-0.119059	0.916667	-0.0870114	0.9	-0.105361	0.818182	-0.200671	1.14583	0.136132	0.735294	-0.307485
272796	24	40	0	1	0	0	19.2277	0	0	0	0	0	0	0	0	0	0	0	0	0	0	1.37	4.35	0.9	0.85	1.58	1.09	12	12	12	16	16	16	1.39796	0.335013	4.53125	1.511	0.9	-0.105361	0.858586	-0.152469	1.59596	0.467475	1.07921	0.0762274
272840	27	39	0	1	1	0	19.8141	0	0	0	0	0	0	0	0	0	0	0	0	0	0	1.27	0.71	1.2	0.84	0.87	1.03	12	12	12	16	16	16	1.29592	0.25922	0.739583	-0.301668	1.2	0.182322	0.848485	-0.164303	0.878788	-0.129212	1.0198	0.0196085
117324	33	39	1	1	1	1	20.7756	0	1	0	0	0	0	0	0	1	0	0	0	0	0	0.83	1.2	0.9	2.66	1.3	0.82	12	12	12	19	19	19	0.846939	-0.166127	1.25	0.223144	0.9	-0.105361	2.68687	0.988376	1.32653	0.282567	0.788462	-0.237672
274508	18	39	0	1	1	0	21.0772	0	0	0	1	0	0	0	0	0	0	0	0	0	0	1.44	0.96	0.9	1.44	0.85	1.4	12	12	12	16	16	16	1.46939	0.384846	1	0	0.9	-0.105361	1.45455	0.374693	0.858586	-0.152469	1.38614	0.326522
204032	36	39	0	1	1	1	20.1348	0	1	0	0	0	0	0	0	1	0	0	0	0	0	0.67	1.75	0.6	0.71	0.97	1.14	12	12	12	16	16	16	0.683673	-0.380275	1.82292	0.600438	0.6	-0.510826	0.717172	-0.33244	0.979798	-0.0204089	1.12871	0.121078
274533	39	38	1	1	0	1	19.4734	0	1	0	0	0	0	0	0	1	0	1	0	0	0	1.24	0.29	1.2	0.91	0.37	0.97	12	12	12	16	16	16	1.26531	0.235314	0.302083	-1.19705	1.2	0.182322	0.919192	-0.0842603	0.373737	-0.984202	0.960396	-0.0404095
217728	35	39	1	1	1	0	18.7305	0	1	0	0	0	0	0	0	1	0	0	0	0	0	1.18	0.84	0.9	1.08	0.56	1.29	13	13	13	17	17	17	1.20408	0.185717	0.875	-0.133531	0.9	-0.105361	1.09091	0.0870114	0.583333	-0.538997	1.26471	0.23484
272936	32	40	1	1	0	0	21.2306	0	1	0	0	0	0	0	0	0	0	0	0	0	0	0.7	0.87	0.9	0.61	0.88	1.03	13	13	13	17	17	17	0.714286	-0.336472	0.90625	-0.0984401	0.9	-0.105361	0.616162	-0.484246	0.916667	-0.0870114	1.0098	0.00975617
147840	31	39	0	1	1	0	19.0274	0	1	0	0	0	0	0	0	0	0	0	0	0	0	0.51	0.77	1	1.81	1.01	0.89	11	11	11	15	15	15	0.536842	-0.622051	0.785714	-0.241162	1	0	1.81	0.593327	0.971154	-0.0292704	0.908163	-0.0963311
273031	31	40	0	1	1	0	19.5312	0	1	0	0	0	0	0	0	0	0	1	0	0	0	0.69	0.88	0.9	0.78	0.55	0.77	12	12	12	16	16	16	0.704082	-0.350861	0.916667	-0.0870114	0.9	-0.105361	0.787879	-0.238411	0.555556	-0.587787	0.762376	-0.271315
274555	23	38	1	1	1	1	17.7999	0	0	1	1	0	0	0	0	0	0	1	0	0	0	1.27	1.62	0.8	0.81	2.14	1.42	12	12	12	16	16	16	1.29592	0.25922	1.6875	0.523248	0.8	-0.223144	0.818182	-0.200671	2.16162	0.770856	1.40594	0.340707
274602	31	39	0	1	0	1	28.9993	0	1	1	1	0	0	0	0	0	0	0	0	0	0	0.86	0.53	1.2	0.94	0.65	0.93	11	11	11	16	16	16	0.905263	-0.0995296	0.540816	-0.614676	1.2	0.182322	0.949495	-0.0518251	0.656566	-0.420733	0.920792	-0.082521
274611	27	39	1	1	1	0	22.5466	0	1	0	1	0	0	0	0	0	0	1	0	0	0	1.09	1.43	1	0.96	0.8	1.05	14	14	14	18	18	18	1.0381	0.0373875	1.53763	0.430245	1	0	0.969697	-0.0307717	0.851064	-0.161268	1	0
274613	34	40	0	1	1	1	23.3242	0	1	0	0	0	0	0	0	0	0	0	0	0	0	0.72	0.99	0.9	0.81	1.3	1.1	13	13	13	17	17	17	0.734694	-0.308301	1.03125	0.0307717	0.9	-0.105361	0.818182	-0.200671	1.35417	0.303186	1.07843	0.0755076
274544	26	40	0	1	1	1	20.0063	0	0	0	0	0	0	0	0	0	0	0	0	0	0	1	2.24	0.6	0.86	1.7	0.89	12	12	12	16	16	16	1.02041	0.0202027	2.33333	0.847298	0.6	-0.510826	0.868687	-0.140773	1.71717	0.540679	0.881188	-0.126484
278067	30	38	0	0	0	0	21.8531	0	0	0	1	0	0	0	0	0	0	0	0	0	0	0.93	0.46	0.9	0.53	0.58	0.96	12	12	12	19	19	19	0.94898	-0.052368	0.479167	-0.735707	0.9	-0.105361	0.535354	-0.624828	0.591837	-0.524524	0.923077	-0.0800427
265500	27	38	1	1	1	0	20.7385	0	0	0	0	0	0	0	0	0	0	0	0	0	0	2.08	0.86	1	1.11	0.68	1.21	12	12	12	17	17	17	2.12245	0.752571	0.895833	-0.110001	1	0	1.12121	0.11441	0.708333	-0.34484	1.18627	0.170818
278112	32	39	1	1	1	1	20.7877	0	1	1	1	0	0	0	0	1	0	0	0	0	0	0.31	1.12	1.1	0.99	0.7	0.8	12	12	12	16	16	16	0.316327	-1.15098	1.16667	0.154151	1.1	0.0953102	1	0	0.707071	-0.346625	0.792079	-0.233094
278395	33	39	1	1	1	1	18.6268	0	0	0	0	0	0	0	0	0	0	0	0	0	0	2.53	0.64	0.9	1.13	0.56	1.43	14	14	14	18	18	18	2.40952	0.879429	0.688172	-0.373716	0.9	-0.105361	1.14141	0.132268	0.595745	-0.517943	1.3619	0.308884
278415	30	38	1	1	1	1	19.487	0	0	1	0	0	0	0	0	0	0	0	0	0	0	1.34	0.77	0.9	1.06	0.88	1.4	13	13	13	17	17	17	1.36735	0.312872	0.802083	-0.220543	0.9	-0.105361	1.07071	0.0683192	0.916667	-0.0870114	1.37255	0.31667
218749	28	39	1	1	1	1	20.202	0	1	0	0	0	0	0	0	0	0	0	0	0	0	0.69	0.79	0.6	1.08	0.65	1.24	12	12	12	17	17	17	0.704082	-0.350861	0.822917	-0.1949	0.6	-0.510826	1.09091	0.0870114	0.677083	-0.389961	1.21569	0.195309
277182	31	38	1	1	1	1	21.6963	0	1	0	0	0	0	0	1	0	0	0	0	0	0	0.54	0.68	0.8	1.02	0.56	1.32	12	12	12	17	17	17	0.55102	-0.595983	0.708333	-0.34484	0.8	-0.223144	1.0303	0.029853	0.583333	-0.538997	1.29412	0.257829
277203	32	41	1	1	1	0	22.7694	0	0	0	0	0	0	0	0	0	0	0	0	0	0	0.93	0.48	1.1	0.91	0.35	1.09	14	14	14	18	18	18	0.885714	-0.121361	0.516129	-0.661398	1.1	0.0953102	0.919192	-0.0842603	0.37234	-0.987947	1.0381	0.0373875
277209	30	41	0	1	1	0	23.8751	0	0	0	0	0	0	0	0	0	0	0	0	0	0	0.79	0.53	0.9	0.7	0.93	0.93	12	12	12	16	16	16	0.806122	-0.21552	0.552083	-0.594056	0.9	-0.105361	0.707071	-0.346625	0.939394	-0.0625204	0.920792	-0.082521
277232	29	39	0	1	0	0	22.3596	0	1	1	1	0	0	0	0	1	0	0	0	0	0	2.91	3.69	1.2	1.43	2.8	1.59	12	12	12	16	16	16	2.96939	1.08836	3.84375	1.34645	1.2	0.182322	1.44444	0.367725	2.82828	1.03967	1.57426	0.453784
276812	22	39	1	1	1	0	18.6214	0	0	0	1	0	0	0	0	0	0	1	0	0	0	2.4	0.45	0.9	1.16	0.39	1.28	13	13	13	17	17	17	2.44898	0.895671	0.46875	-0.757686	0.9	-0.105361	1.17172	0.15847	0.40625	-0.900787	1.2549	0.227057
278503	32	39	1	1	1	1	19.9472	0	1	0	0	0	0	0	0	1	0	0	0	0	0	0.7	1.76	1.3	0.72	2.05	1.19	13	13	13	17	17	17	0.714286	-0.336472	1.83333	0.606136	1.3	0.262364	0.727273	-0.318454	2.13542	0.758662	1.16667	0.154151
278513	30	39	1	1	1	1	20.9042	0	0	0	0	0	0	0	0	0	0	0	0	0	0	1.07	0.67	0.9	0.86	0.52	1.26	12	12	12	17	17	17	1.09184	0.0878614	0.697917	-0.359656	0.9	-0.105361	0.868687	-0.140773	0.541667	-0.613104	1.23529	0.211309
279444	33	41	1	1	1	1	16.4446	0	0	0	0	0	0	0	0	0	0	0	0	0	0	1.42	0.83	1.1	1.62	1.07	1.04	12	12	12	17	17	17	1.44898	0.37086	0.864583	-0.145508	1.1	0.0953102	1.63636	0.492476	1.11458	0.108481	1.01961	0.0194181
249899	30	39	1	1	1	1	22.9398	0	0	1	1	0	0	0	0	0	0	0	0	0	0	1.06	0.39	0.9	0.98	0.73	1.32	12	12	12	16	16	16	1.08163	0.0784716	0.40625	-0.900787	0.9	-0.105361	0.989899	-0.0101524	0.737374	-0.30466	1.30693	0.267681
279450	35	40	1	1	1	1	17.9931	0	1	1	0	0	0	0	0	0	0	0	0	0	0	0.46	0.95	0.7	1.26	1	0.83	12	12	12	17	17	17	0.469388	-0.756326	0.989583	-0.0104713	0.7	-0.356675	1.27273	0.241162	1.04167	0.040822	0.813725	-0.206132
279453	22	39	0	1	0	0	17.7999	0	0	1	1	0	0	0	0	0	0	0	0	0	0	1.11	0.89	0.9	2.01	0.79	1.24	12	12	12	16	16	16	1.13265	0.124563	0.927083	-0.0757118	0.9	-0.105361	2.0303	0.708185	0.79798	-0.225672	1.22772	0.205161
216843	25	38	1	1	1	0	21.1927	0	0	0	0	0	0	0	0	0	0	0	0	0	0	1.14	1.72	0.9	1.21	0.9	1.18	12	12	12	16	16	16	1.16327	0.151231	1.79167	0.583146	0.9	-0.105361	1.22222	0.200671	0.909091	-0.0953102	1.16832	0.155564
277952	30	39	1	1	1	0	23.9512	0	1	0	0	0	0	0	0	0	0	0	0	0	0	1.07	2.8	0.7	1.07	1.66	1	13	13	13	17	17	17	1.09184	0.0878614	2.91667	1.07044	0.7	-0.356675	1.08081	0.077709	1.72917	0.54764	0.980392	-0.0198026
277993	32	40	1	1	1	1	19.052	0	0	0	0	0	0	0	0	0	0	0	0	0	0	0.55	0.34	0.9	0.83	0.47	1.34	13	13	13	17	17	17	0.561224	-0.577634	0.354167	-1.03799	0.9	-0.105361	0.838384	-0.176279	0.489583	-0.714201	1.31373	0.272867
276875	33	35	0	1	1	1	22.6003	0	1	0	0	1	0	1	0	1	0	0	0	0	0	1.22	0.34	0.9	0.83	0.32	1.19	12	12	12	16	16	16	1.2449	0.219054	0.354167	-1.03799	0.9	-0.105361	0.838384	-0.176279	0.323232	-1.12938	1.17822	0.164003
278231	27	39	0	1	0	1	18.3635	0	1	0	1	0	0	0	0	0	0	0	0	0	0	0.55	1.13	0.7	1.64	1.04	0.99	12	12	12	17	17	17	0.561224	-0.577634	1.17708	0.16304	0.7	-0.356675	1.65657	0.504747	1.08333	0.0800427	0.970588	-0.029853
148039	39	39	1	1	1	1	24.5243	0	1	1	1	0	0	0	0	0	0	1	0	0	0	1.03	1.39	1.1	0.8	1.24	1.05	12	12	12	17	17	17	1.05102	0.0497615	1.44792	0.370126	1.1	0.0953102	0.808081	-0.213093	1.29167	0.255933	1.02941	0.0289875
197793	30	40	1	1	1	0	21.9289	0	1	0	0	0	0	0	0	0	0	0	0	0	0	0.65	1.41	1.1	0.92	1.71	1.06	13	13	13	18	18	18	0.663265	-0.41058	1.46875	0.384412	1.1	0.0953102	0.929293	-0.0733313	1.81915	0.598369	1.00952	0.00947874
279310	27	39	1	1	1	1	21.5139	0	0	0	0	0	0	0	0	0	0	1	0	0	0	1.47	0.61	1.7	1.27	1.21	1.2	12	12	12	16	16	16	1.5	0.405465	0.635417	-0.453474	1.7	0.530628	1.28283	0.249067	1.22222	0.200671	1.18812	0.172371
240474	28	40	0	1	1	1	19.6059	0	0	0	0	0	0	0	0	0	0	0	0	0	0	1.96	0.9	0.6	0.93	0.73	1.06	12	12	12	17	17	17	2	0.693147	0.9375	-0.0645385	0.6	-0.510826	0.939394	-0.0625204	0.760417	-0.273889	1.03922	0.0384663
277666	28	39	0	1	1	0	22.0934	0	0	0	1	0	0	0	0	0	0	1	0	0	0	1.65	1.05	1	0.98	1.17	1.25	13	13	13	16	16	16	1.68367	0.520978	1.09375	0.0896122	1	0	0.989899	-0.0101524	1.18182	0.167054	1.23762	0.213193
277730	29	39	1	1	1	1	20.9321	0	1	0	0	0	0	0	0	0	0	0	0	0	0	0.68	0.56	0.9	1.14	0.77	1.17	11	11	11	15	15	15	0.715789	-0.334369	0.571429	-0.559616	0.9	-0.105361	1.14	0.131028	0.740385	-0.300585	1.19388	0.177206
277736	28	39	0	1	0	1	21.7778	0	0	1	1	0	0	0	1	0	0	1	0	0	0	1.42	2.16	1.4	1.09	0.93	1.73	12	12	12	16	16	16	1.44898	0.37086	2.25	0.81093	1.4	0.336472	1.10101	0.096228	0.939394	-0.0625204	1.71287	0.538171
151263	34	39	1	1	0	1	30.8185	0	1	0	0	0	0	0	0	1	0	0	0	0	0	0.89	1.02	1.1	1.47	1.16	0.99	13	13	13	17	17	17	0.908163	-0.0963311	1.0625	0.0606246	1.1	0.0953102	1.48485	0.395313	1.20833	0.189242	0.970588	-0.029853
229968	28	39	0	1	1	0	32.0204	0	1	0	1	0	0	0	0	0	0	1	0	0	0	2.46	1.49	0.9	0.82	1.05	1.09	12	12	12	17	17	17	2.5102	0.920364	1.55208	0.439598	0.9	-0.105361	0.828283	-0.188401	1.09375	0.0896122	1.06863	0.0663751
276614	27	39	1	1	1	1	23.858	0	0	1	1	0	0	0	0	0	0	1	0	0	0	1	2.41	1	0.74	2.03	0.97	13	13	13	17	17	17	1.02041	0.0202027	2.51042	0.920449	1	0	0.747475	-0.291055	2.11458	0.748858	0.95098	-0.0502618
138827	31	39	1	1	1	1	19.7599	0	1	0	1	0	0	0	0	0	0	0	0	0	0	1.72	0.96	1.5	1.27	1.92	1.09	12	12	12	16	16	16	1.7551	0.562527	1	0	1.5	0.405465	1.28283	0.249067	1.93939	0.662376	1.07921	0.0762274
162000	29	38	0	1	1	1	18.3143	0	1	0	0	0	0	0	0	0	0	0	0	0	0	0.65	0.65	1	1.19	0.49	1.23	12	12	12	16	16	16	0.663265	-0.41058	0.677083	-0.389961	1	0	1.20202	0.184004	0.494949	-0.7033	1.21782	0.197064
276562	29	39	0	1	0	1	19.1075	0	0	1	1	0	0	0	1	0	0	1	0	0	0	2.11	0.96	0.6	3.16	0.94	1.72	13	13	13	17	17	17	2.15306	0.766891	1	0	0.6	-0.510826	3.19192	1.16062	0.979167	-0.0210534	1.68627	0.522522
276573	24	38	1	1	1	1	18.3732	0	0	0	1	0	0	0	0	0	0	0	0	0	0	0.62	0.41	1.3	1.01	0.31	1.5	14	14	14	18	18	18	0.590476	-0.526826	0.44086	-0.819027	1.3	0.262364	1.0202	0.0200007	0.329787	-1.10931	1.42857	0.356675
276587	23	40	1	1	1	1	21.1477	0	0	0	1	0	0	0	0	0	0	0	0	0	0	0.78	0.75	0.8	1.14	0.63	1.28	13	13	13	18	18	18	0.795918	-0.228259	0.78125	-0.24686	0.8	-0.223144	1.15152	0.141079	0.670213	-0.40016	1.21905	0.19807
277212	24	39	0	1	0	1	22.0604	0	0	0	0	0	0	0	0	0	0	0	0	0	0	0.55	1.33	1.1	0.85	1	1.06	12	12	12	16	16	16	0.561224	-0.577634	1.38542	0.326001	1.1	0.0953102	0.858586	-0.152469	1.0101	0.0100503	1.0495	0.0483186
175658	31	38	0	1	1	0	21.9289	0	1	1	0	0	0	0	0	0	0	0	0	0	0	1.94	2.02	0.7	0.67	1.14	1.15	12	12	12	17	17	17	1.97959	0.682891	2.10417	0.74392	0.7	-0.356675	0.676768	-0.390427	1.1875	0.17185	1.12745	0.119959
277600	27	38	1	0	0	0	17.4818	1	0	1	0	0	0	0	0	0	0	0	0	0	0	0.71	0.42	0.7	1.11	0.69	1.2	12	12	12	16	16	16	0.72449	-0.322288	0.4375	-0.826679	0.7	-0.356675	1.12121	0.11441	0.69697	-0.361013	1.18812	0.172371
277603	27	39	0	1	1	1	23.833	0	0	0	0	0	0	0	0	0	0	0	0	0	0	1.51	2.35	1.2	1.05	1.57	1.14	13	13	13	18	18	18	1.54082	0.432312	2.44792	0.895237	1.2	0.182322	1.06061	0.0588405	1.67021	0.512951	1.08571	0.0822381
218690	30	39	1	1	1	1	25.6745	0	1	1	1	0	0	0	0	1	0	0	0	0	0	1.56	0.49	1.4	1.32	0.55	0.95	13	13	13	18	18	18	1.59184	0.464889	0.510417	-0.672528	1.4	0.336472	1.33333	0.287682	0.585106	-0.535962	0.904762	-0.100083
278012	33	37	1	1	1	1	21.2191	0	1	0	0	0	0	0	0	0	0	0	0	0	0	1.33	2.59	0.8	0.67	2.27	1.16	12	12	12	16	16	16	1.35714	0.305382	2.69792	0.99248	0.8	-0.223144	0.676768	-0.390427	2.29293	0.82983	1.14851	0.13847
177638	34	39	0	1	1	0	19.9481	0	1	1	0	0	0	0	0	0	0	1	0	0	0	0.81	1.01	0.9	0.75	0.6	1.19	13	13	13	17	17	17	0.826531	-0.190518	1.05208	0.0507723	0.9	-0.105361	0.757576	-0.277632	0.625	-0.470004	1.16667	0.154151
278034	34	39	1	1	1	0	23.9519	0	1	0	1	0	0	0	0	1	0	1	0	0	0	1.12	0.78	1.2	1.33	0.72	1.78	13	13	13	17	17	17	1.14286	0.133531	0.8125	-0.207639	1.2	0.182322	1.34343	0.295229	0.75	-0.287682	1.7451	0.556811
208537	30	38	1	1	1	1	16.8663	0	1	0	0	0	0	0	0	0	0	0	0	0	0	0.89	0.48	1.1	1.33	0.8	1.01	12	12	12	17	17	17	0.908163	-0.0963311	0.5	-0.693147	1.1	0.0953102	1.34343	0.295229	0.833333	-0.182322	0.990196	-0.0098523
201203	30	40	1	1	1	0	17.8506	0	1	0	0	0	0	0	0	0	0	0	0	0	0	1.04	0.77	1.2	0.96	0.52	1.39	12	12	12	16	16	16	1.06122	0.0594234	0.802083	-0.220543	1.2	0.182322	0.969697	-0.0307717	0.525253	-0.643876	1.37624	0.319353
278336	27	38	0	1	1	1	19.5312	0	0	0	0	0	0	0	0	0	0	0	0	0	0	0.66	1.61	0.9	0.9	1.67	1.09	12	12	12	16	16	16	0.673469	-0.395313	1.67708	0.517056	0.9	-0.105361	0.909091	-0.0953102	1.68687	0.522874	1.07921	0.0762274
276983	33	38	0	1	1	1	22.3543	0	1	0	0	0	0	0	0	1	0	0	0	0	0	1.01	1.14	1	0.99	1.3	1.09	13	13	13	17	17	17	1.03061	0.030153	1.1875	0.17185	1	0	1	0	1.35417	0.303186	1.06863	0.0663751
278351	29	41	0	1	1	1	22.5414	0	0	0	0	0	0	0	0	0	0	0	0	0	0	1.47	1.3	0.7	0.89	1.2	0.94	12	12	12	16	16	16	1.5	0.405465	1.35417	0.303186	0.7	-0.356675	0.89899	-0.106483	1.21212	0.192372	0.930693	-0.0718257
279316	30	38	1	1	1	0	18.5901	1	0	0	0	0	0	0	0	0	0	0	0	0	0	0.75	0.82	1.2	1.62	0.88	0.88	12	12	12	16	16	16	0.765306	-0.267479	0.854167	-0.157629	1.2	0.182322	1.63636	0.492476	0.888889	-0.117783	0.871287	-0.137784
279338	32	40	1	1	1	0	21.0962	0	0	1	0	0	0	0	1	0	0	1	0	0	0	0.42	0.51	1.5	0.63	0.66	1.46	12	12	12	16	16	16	0.428571	-0.847298	0.53125	-0.632523	1.5	0.405465	0.636364	-0.451985	0.666667	-0.405465	1.44554	0.368486
279341	26	40	0	1	0	0	21.3333	0	0	1	1	0	0	0	0	0	0	1	0	0	0	1.58	0.61	1	0.78	0.44	0.96	12	12	12	17	17	17	1.61224	0.477628	0.635417	-0.453474	1	0	0.787879	-0.238411	0.458333	-0.780159	0.941176	-0.0606246
279380	20	40	0	1	1	1	19.7239	0	0	1	0	0	0	0	0	0	0	0	0	0	0	0.57	0.41	1	0.68	0.46	1.26	13	13	13	17	17	17	0.581633	-0.541916	0.427083	-0.850776	1	0	0.686869	-0.375612	0.479167	-0.735707	1.23529	0.211309
275686	31	40	1	1	0	1	16.436	0	0	1	1	0	0	0	1	0	0	1	0	0	0	1.08	0.88	1	1.11	0.68	1.22	12	12	12	17	17	17	1.10204	0.0971637	0.916667	-0.0870114	1	0	1.12121	0.11441	0.708333	-0.34484	1.19608	0.179048
276904	26	39	1	1	1	1	19.487	0	0	0	0	0	0	0	0	0	0	0	0	0	0	1.04	0.58	0.7	1.18	1.03	0.94	11	11	11	15	15	15	1.09474	0.090514	0.591837	-0.524524	0.7	-0.356675	1.18	0.165514	0.990385	-0.00966191	0.959184	-0.0416727
277054	34	40	0	1	1	1	20.3125	0	1	0	1	0	0	0	0	1	0	0	0	0	0	0.97	1.75	1	0.82	1.49	1.17	12	12	12	16	16	16	0.989796	-0.0102565	1.82292	0.600438	1	0	0.828283	-0.188401	1.50505	0.408826	1.15842	0.147053
277074	30	38	0	1	1	1	24.3865	0	0	0	1	0	0	0	0	0	0	1	0	0	0	0.74	0.31	1.2	0.81	0.51	1.07	12	12	12	15	15	15	0.755102	-0.280902	0.322917	-1.13036	1.2	0.182322	0.81	-0.210721	0.490385	-0.712565	1.09184	0.0878614
277100	32	39	1	1	1	0	18.1967	0	1	1	1	0	0	0	0	1	0	0	0	0	0	0.56	0.67	0.9	1.12	0.63	1.03	12	12	12	16	16	16	0.571429	-0.559616	0.697917	-0.359656	0.9	-0.105361	1.13131	0.123379	0.636364	-0.451985	1.0198	0.0196085
273685	35	39	1	1	0	0	24.0882	0	1	1	1	0	0	0	0	0	0	0	0	0	0	0.88	1.78	1.1	1.28	2.98	0.8	12	12	12	16	16	16	0.897959	-0.107631	1.85417	0.617435	1.1	0.0953102	1.29293	0.25691	3.0101	1.10197	0.792079	-0.233094
277775	24	40	0	1	1	1	22.1282	0	0	1	1	0	0	0	0	0	0	0	0	0	0	0.77	0.66	0.8	0.58	0.5	1.25	13	13	13	17	17	17	0.785714	-0.241162	0.6875	-0.374693	0.8	-0.223144	0.585859	-0.534677	0.520833	-0.652325	1.22549	0.203341
85249	29	40	1	1	1	0	18.4425	0	1	0	1	0	0	0	1	1	0	0	0	0	0	0.69	1.47	0.9	1.42	1.99	1.1	12	12	12	15	15	15	0.704082	-0.350861	1.53125	0.426084	0.9	-0.105361	1.42	0.350657	1.91346	0.648914	1.12245	0.115513
277959	29	40	1	1	1	0	20.9644	0	0	1	0	0	0	0	0	0	0	0	0	0	0	1.29	1.77	1.3	0.96	2.17	1	12	12	12	16	16	16	1.31633	0.274845	1.84375	0.611802	1.3	0.262364	0.969697	-0.0307717	2.19192	0.784778	0.990099	-0.00995033
277971	34	39	0	1	0	0	23.5078	0	1	0	0	0	0	0	0	0	0	1	0	0	0	0.4	0.92	1.1	0.66	0.41	0.98	12	12	12	17	17	17	0.408163	-0.896088	0.958333	-0.0425596	1.1	0.0953102	0.666667	-0.405465	0.427083	-0.850776	0.960784	-0.0400053
276760	31	38	1	1	1	1	20.217	0	1	0	0	0	0	0	0	1	0	0	0	0	0	0.48	1.27	0.6	0.86	0.83	0.77	12	12	12	16	16	16	0.489796	-0.713766	1.32292	0.279839	0.6	-0.510826	0.868687	-0.140773	0.838384	-0.176279	0.762376	-0.271315
188293	31	40	0	1	1	1	20.0288	0	1	0	0	0	0	0	0	0	0	0	0	0	0	1.81	0.81	1.1	0.99	0.5	1.03	13	13	13	19	19	19	1.84694	0.61353	0.84375	-0.169899	1.1	0.0953102	1	0	0.510204	-0.672944	0.990385	-0.00966191
276808	32	39	0	1	1	1	25.8297	0	1	1	0	0	0	0	0	1	0	1	0	0	0	0.51	1.95	0.7	0.78	1.83	1	12	12	12	16	16	16	0.520408	-0.653142	2.03125	0.708651	0.7	-0.356675	0.787879	-0.238411	1.84848	0.614366	0.990099	-0.00995033
182008	28	39	1	1	0	1	23.5304	0	1	1	1	0	0	0	0	0	0	0	0	0	0	1.28	2.34	1	0.96	3.04	0.73	12	12	12	17	17	17	1.30612	0.267063	2.4375	0.890973	1	0	0.969697	-0.0307717	3.16667	1.15268	0.715686	-0.334513
276893	28	40	1	1	1	1	23.1481	0	0	1	1	0	0	0	0	0	0	0	0	0	0	0.78	0.81	1.1	0.98	0.45	0.83	12	12	12	16	16	16	0.795918	-0.228259	0.84375	-0.169899	1.1	0.0953102	0.989899	-0.0101524	0.454545	-0.788457	0.821782	-0.19628
264387	26	39	0	1	1	1	16.7969	0	1	1	0	0	0	0	0	1	0	0	0	0	0	1.12	1.85	0.9	1.22	2.16	1.01	12	12	12	16	16	16	1.14286	0.133531	1.92708	0.656008	0.9	-0.105361	1.23232	0.208901	2.18182	0.780159	1	0
276652	24	38	0	1	0	1	16.5093	0	1	0	0	0	0	0	0	0	0	0	0	0	0	1.16	0.4	1.1	1.23	0.49	0.96	13	13	13	17	17	17	1.18367	0.168623	0.416667	-0.875469	1.1	0.0953102	1.24242	0.217065	0.510417	-0.672528	0.941176	-0.0606246
165815	32	39	1	1	1	1	19.2677	0	1	0	0	0	0	0	0	0	0	0	0	0	0	0.51	0.54	1	1.17	0.39	1.48	12	12	12	17	17	17	0.520408	-0.653142	0.5625	-0.575364	1	0	1.18182	0.167054	0.40625	-0.900787	1.45098	0.372239
276956	30	39	1	1	1	1	18.4089	0	1	0	0	0	0	0	0	1	0	0	0	0	0	1.15	0.67	0.8	1.03	0.61	0.94	12	12	12	16	16	16	1.17347	0.159965	0.697917	-0.359656	0.8	-0.223144	1.0404	0.0396091	0.616162	-0.484246	0.930693	-0.0718257
276959	32	39	0	1	1	1	19.5717	0	1	0	0	0	0	0	0	1	0	0	0	1	0	0.96	0.91	0.8	1.5	1.33	1.04	12	12	12	17	17	17	0.979592	-0.0206193	0.947917	-0.0534887	0.8	-0.223144	1.51515	0.415515	1.38542	0.326001	1.01961	0.0194181
277725	27	39	0	1	1	1	24.5316	0	1	1	0	0	0	0	0	0	0	0	0	0	0	3.28	1.97	1.5	1.12	2.44	1.43	12	12	12	16	16	16	3.34694	1.20805	2.05208	0.718856	1.5	0.405465	1.13131	0.123379	2.46465	0.902048	1.41584	0.347724
277727	27	38	0	0	1	1	18.662	0	1	0	0	0	0	0	0	0	0	0	0	0	0	0.85	3.59	1	0.82	3.48	1.04	12	12	12	16	16	16	0.867347	-0.142316	3.73958	1.31897	1	0	0.828283	-0.188401	3.51515	1.25708	1.0297	0.0292704
275035	29	41	0	1	0	1	21.4536	0	1	1	1	0	0	0	0	0	0	0	0	0	0	0.96	2.3	0.8	0.95	1.46	0.83	12	12	12	16	16	16	0.979592	-0.0206193	2.39583	0.873731	0.8	-0.223144	0.959596	-0.041243	1.47475	0.388487	0.821782	-0.19628
211999	24	39	0	1	0	1	26.6728	0	1	0	0	0	0	0	0	1	0	0	0	0	0	1.57	0.96	0.8	0.91	0.91	1.24	12	12	12	16	16	16	1.60204	0.471278	1	0	0.8	-0.223144	0.919192	-0.0842603	0.919192	-0.0842603	1.22772	0.205161
275150	24	39	1	1	1	0	22.6273	0	0	1	0	0	0	0	0	0	0	1	0	0	0	2.19	0.46	0.9	1.3	0.67	0.92	13	13	13	17	17	17	2.23469	0.804104	0.479167	-0.735707	0.9	-0.105361	1.31313	0.272415	0.697917	-0.359656	0.901961	-0.103184
248061	30	37	0	1	1	1	20.4294	0	0	1	1	0	0	0	0	0	0	0	0	0	0	0.82	0.97	0.6	0.69	0.75	0.94	12	12	12	17	17	17	0.836735	-0.178248	1.01042	0.0103628	0.6	-0.510826	0.69697	-0.361013	0.78125	-0.24686	0.921569	-0.081678
127037	33	35	1	1	1	0	18.75	0	1	0	0	1	0	1	0	0	0	0	0	0	0	0.22	1.25	1	2.56	1.77	1.17	13	13	13	17	17	17	0.22449	-1.49393	1.30208	0.263966	1	0	2.58586	0.950058	1.84375	0.611802	1.14706	0.137201
178048	28	40	0	1	1	1	24.5243	0	0	0	0	0	0	0	0	0	0	1	0	0	0	1.32	1.27	1.2	0.99	0.89	1.15	12	12	12	17	17	17	1.34694	0.297834	1.32292	0.279839	1.2	0.182322	1	0	0.927083	-0.0757118	1.12745	0.119959
275212	26	38	1	1	1	1	23.4236	0	0	0	1	0	0	0	0	0	0	0	0	0	0	1.77	0.67	0.7	0.84	0.77	0.66	13	13	13	17	17	17	1.80612	0.591182	0.697917	-0.359656	0.7	-0.356675	0.848485	-0.164303	0.802083	-0.220543	0.647059	-0.435318
274578	27	39	0	1	1	1	19.7325	0	0	1	1	0	0	0	0	0	0	0	0	0	0	0.69	1.03	1.4	0.77	1.13	0.87	12	12	12	16	16	16	0.704082	-0.350861	1.07292	0.0703808	1.4	0.336472	0.777778	-0.251314	1.14141	0.132268	0.861386	-0.149212
274586	25	39	0	1	1	0	17.1875	0	0	0	0	0	0	0	0	0	0	0	0	0	0	1.26	1.4	1	0.68	1.22	0.95	13	13	13	17	17	17	1.28571	0.251314	1.45833	0.377294	1	0	0.686869	-0.375612	1.27083	0.239673	0.931373	-0.0710959
265904	29	41	0	1	1	1	18.2925	0	0	1	1	0	0	0	0	0	0	0	0	0	0	1.43	2.51	1	1.03	3.07	1.2	14	14	14	19	19	19	1.3619	0.308884	2.69892	0.992853	1	0	1.0404	0.0396091	3.13265	1.14188	1.15385	0.143101
275647	33	39	0	1	1	1	23.618	0	1	1	1	0	0	0	0	0	0	0	0	0	0	0.73	0.56	0.9	0.74	0.46	0.81	12	12	12	16	16	16	0.744898	-0.294508	0.583333	-0.538997	0.9	-0.105361	0.747475	-0.291055	0.464646	-0.766478	0.80198	-0.220671
214283	24	39	0	1	0	0	32.4557	0	1	0	1	0	0	0	0	0	0	1	0	0	0	0.66	1.05	1	0.59	1.07	1.33	12	12	12	16	16	16	0.673469	-0.395313	1.09375	0.0896122	1	0	0.59596	-0.517582	1.08081	0.077709	1.31683	0.275229
275668	30	39	1	1	1	1	19.9432	0	0	0	1	0	0	0	0	0	0	0	0	0	0	1.87	0.93	0.8	1.4	0.79	1.12	12	12	12	17	17	17	1.90816	0.646141	0.96875	-0.0317487	0.8	-0.223144	1.41414	0.346523	0.822917	-0.1949	1.09804	0.0935261
274624	38	36	1	1	1	0	20.3428	0	0	0	0	1	0	1	0	0	0	0	0	0	0	1.26	0.38	1	1.42	0.4	1.17	12	12	12	16	16	16	1.28571	0.251314	0.395833	-0.926762	1	0	1.43434	0.360707	0.40404	-0.90624	1.15842	0.147053
208572	35	39	0	1	1	1	17.2635	0	1	0	0	0	0	0	0	0	0	1	0	0	0	1.25	2.46	0.7	1.2	2.33	1.32	12	12	12	17	17	17	1.27551	0.243346	2.5625	0.940983	0.7	-0.356675	1.21212	0.192372	2.42708	0.88669	1.29412	0.257829
273801	24	39	1	1	0	0	20.9155	0	0	1	1	0	0	0	0	0	0	0	0	0	0	0.63	0.31	1.3	1.09	0.43	1.77	13	13	13	17	17	17	0.642857	-0.441833	0.322917	-1.13036	1.3	0.262364	1.10101	0.096228	0.447917	-0.803148	1.73529	0.551177
273263	43	37	1	1	0	1	20.1562	0	1	0	0	0	0	0	0	0	0	2	0	0	0	0.71	0.75	1	1.29	1.06	0.62	12	12	12	17	17	17	0.72449	-0.322288	0.78125	-0.24686	1	0	1.30303	0.264693	1.10417	0.0990909	0.607843	-0.497838
212197	21	40	0	1	0	0	19.428	0	1	1	1	0	0	0	0	0	0	0	0	0	0	0.65	0.57	0.8	0.88	0.59	1.03	13	13	13	17	17	17	0.663265	-0.41058	0.59375	-0.521297	0.8	-0.223144	0.888889	-0.117783	0.614583	-0.486811	1.0098	0.00975617
274398	21	39	1	1	0	0	20.6142	0	0	1	1	0	0	0	0	0	0	0	0	0	0	0.69	0.97	0.9	0.84	0.88	0.98	12	12	12	16	16	16	0.704082	-0.350861	1.01042	0.0103628	0.9	-0.105361	0.848485	-0.164303	0.888889	-0.117783	0.970297	-0.030153
274439	24	39	1	1	1	0	19.0579	0	0	1	1	0	0	0	0	0	0	0	0	0	0	1.56	0.55	1.5	1.24	0.29	1.11	13	13	13	17	17	17	1.59184	0.464889	0.572917	-0.557015	1.5	0.405465	1.25253	0.225162	0.302083	-1.19705	1.08824	0.0845574
274457	22	39	1	1	0	0	22.0317	0	0	1	0	0	0	0	0	0	0	1	0	0	0	0.59	0.52	1.1	0.84	0.5	1.2	12	12	12	16	16	16	0.602041	-0.50743	0.541667	-0.613104	1.1	0.0953102	0.848485	-0.164303	0.505051	-0.683097	1.18812	0.172371
274465	26	38	1	1	1	1	18.369	0	0	0	1	0	0	0	0	0	0	0	0	1	0	0.78	1.27	0.9	0.84	1.53	0.97	13	13	13	17	17	17	0.795918	-0.228259	1.32292	0.279839	0.9	-0.105361	0.848485	-0.164303	1.59375	0.46609	0.95098	-0.0502618
222823	31	38	0	1	1	0	22.6562	0	1	0	0	0	0	0	0	0	0	0	0	0	0	1.4	0.79	0.9	0.78	0.93	1.11	14	14	14	18	18	18	1.33333	0.287682	0.849462	-0.163152	0.9	-0.105361	0.787879	-0.238411	0.989362	-0.0106953	1.05714	0.0555699
272075	30	39	1	1	1	1	18.4425	0	1	0	0	0	0	0	0	0	0	0	0	0	0	0.83	1.45	1.1	1.11	1.56	1.08	12	12	12	16	16	16	0.846939	-0.166127	1.51042	0.412386	1.1	0.0953102	1.12121	0.11441	1.57576	0.454736	1.06931	0.0670107
227367	23	39	1	1	0	0	24.0344	0	1	0	0	0	0	0	0	0	0	0	0	0	0	0.7	0.42	1	0.84	0.33	0.97	12	12	12	16	16	16	0.714286	-0.336472	0.4375	-0.826679	1	0	0.848485	-0.164303	0.333333	-1.09861	0.960396	-0.0404095
275237	24	38	1	1	0	1	18.9866	0	0	0	0	0	0	0	0	0	0	0	0	0	0	1.18	1.08	1	1.27	0.96	1.11	13	13	13	17	17	17	1.20408	0.185717	1.125	0.117783	1	0	1.28283	0.249067	1	0	1.08824	0.0845574
160142	36	39	1	1	1	0	20.8189	0	1	0	0	0	0	0	0	1	0	0	0	0	0	0.95	0.45	0.8	0.79	0.47	1.06	12	12	12	16	16	16	0.969388	-0.0310906	0.46875	-0.757686	0.8	-0.223144	0.79798	-0.225672	0.474747	-0.744972	1.0495	0.0483186
130309	37	39	0	1	1	1	20.2848	0	1	0	0	0	0	0	0	1	0	1	0	0	0	0.76	0.36	1.1	0.89	0.42	1	12	12	12	16	16	16	0.77551	-0.254234	0.375	-0.980829	1.1	0.0953102	0.89899	-0.106483	0.424242	-0.85745	0.990099	-0.00995033
273543	26	40	0	1	1	1	18.3143	0	0	0	0	0	0	0	0	0	0	0	0	0	0	2.34	0.84	1.1	1.17	1.01	1.05	12	12	12	17	17	17	2.38776	0.870354	0.875	-0.133531	1.1	0.0953102	1.18182	0.167054	1.05208	0.0507723	1.02941	0.0289875
261747	34	37	0	1	1	1	18.2544	0	1	1	1	0	0	0	0	1	0	0	0	0	0	8.89	1.64	0.9	1.02	1.05	1.13	12	12	12	16	16	16	9.07143	2.20513	1.70833	0.535518	0.9	-0.105361	1.0303	0.029853	1.06061	0.0588405	1.11881	0.112267
273657	27	38	1	1	1	1	19.1243	0	0	0	0	0	0	0	0	0	0	0	0	0	0	1.06	1.07	0.8	0.93	1.98	1.19	12	12	12	16	16	16	1.08163	0.0784716	1.11458	0.108481	0.8	-0.223144	0.939394	-0.0625204	2	0.693147	1.17822	0.164003
273743	31	38	0	1	1	0	19.1484	0	1	0	0	0	0	0	0	0	0	1	0	0	0	0.66	0.87	0.8	0.68	0.57	0.95	12	12	12	17	17	17	0.673469	-0.395313	0.90625	-0.0984401	0.8	-0.223144	0.686869	-0.375612	0.59375	-0.521297	0.931373	-0.0710959
275441	26	40	0	1	0	1	26.3281	0	0	1	1	0	0	0	0	0	0	0	0	1	0	0.72	0.46	1.3	1.04	0.8	1.15	12	12	12	17	17	17	0.734694	-0.308301	0.479167	-0.735707	1.3	0.262364	1.05051	0.049271	0.833333	-0.182322	1.12745	0.119959
265851	32	37	0	1	1	0	18.4265	0	0	0	0	0	0	0	0	0	0	0	0	0	0	1.01	0.99	0.8	1.9	0.65	1.68	14	14	14	18	18	18	0.961905	-0.0388398	1.06452	0.0625204	0.8	-0.223144	1.91919	0.651904	0.691489	-0.368908	1.6	0.470004
275500	27	40	0	1	1	1	18.591	0	0	1	0	0	0	0	0	0	0	0	0	0	0	0.96	0.65	1	1.12	0.72	1.32	14	14	14	18	18	18	0.914286	-0.0896122	0.698925	-0.358212	1	0	1.13131	0.123379	0.765957	-0.266629	1.25714	0.228842
275518	26	38	1	1	1	1	18.1641	0	0	1	0	0	0	0	0	0	0	0	0	0	0	0.48	0.64	1.4	0.86	1.12	1.01	13	13	13	17	17	17	0.489796	-0.713766	0.666667	-0.405465	1.4	0.336472	0.868687	-0.140773	1.16667	0.154151	0.990196	-0.0098523
275559	29	41	1	1	1	1	21.0938	0	0	0	0	0	0	0	0	0	0	1	0	0	0	1.47	1.08	0.8	0.68	0.99	1.43	13	13	13	17	17	17	1.5	0.405465	1.125	0.117783	0.8	-0.223144	0.686869	-0.375612	1.03125	0.0307717	1.40196	0.337872
274641	27	40	1	1	1	0	19.8141	0	0	0	0	0	0	0	0	0	0	0	0	1	0	0.93	0.41	1	1.07	0.34	1.87	13	13	13	17	17	17	0.94898	-0.052368	0.427083	-0.850776	1	0	1.08081	0.077709	0.354167	-1.03799	1.83333	0.606136
274659	33	39	0	1	1	0	24.1217	0	1	0	0	0	0	0	0	0	0	0	0	0	0	0.82	0.46	0.8	0.93	0.49	1.3	11	11	11	15	15	15	0.863158	-0.147158	0.469388	-0.756326	0.8	-0.223144	0.93	-0.0725707	0.471154	-0.752571	1.32653	0.282567
274667	32	40	1	1	1	1	27.2656	0	1	1	0	0	0	0	0	0	0	0	0	0	0	0.28	1.27	0.9	0.77	1.49	1.15	14	14	14	19	19	19	0.266667	-1.32176	1.36559	0.311588	0.9	-0.105361	0.777778	-0.251314	1.52041	0.418979	1.10577	0.100541
274714	25	39	1	1	1	1	25.1953	0	0	0	0	0	0	0	0	0	0	0	0	0	0	0.82	0.51	0.7	0.74	0.47	1.26	12	12	12	16	16	16	0.836735	-0.178248	0.53125	-0.632523	0.7	-0.356675	0.747475	-0.291055	0.474747	-0.744972	1.24752	0.221161
273729	23	39	0	1	0	0	17.5668	0	0	0	1	0	0	0	0	0	0	0	0	0	0	1.22	1.49	1	1.18	1.13	1.54	12	12	12	16	16	16	1.2449	0.219054	1.55208	0.439598	1	0	1.19192	0.175565	1.14141	0.132268	1.52475	0.421832
201711	26	38	1	1	0	1	19.4531	0	1	0	1	0	0	0	0	0	0	0	0	0	0	1.07	0.68	1.1	0.75	0.57	1.48	13	13	13	18	18	18	1.09184	0.0878614	0.708333	-0.34484	1.1	0.0953102	0.757576	-0.277632	0.606383	-0.500244	1.40952	0.343252
273735	27	38	1	1	1	1	17.9458	0	0	0	0	0	0	0	0	0	0	0	0	0	0	1.58	0.68	0.9	0.7	0.66	1.18	13	13	13	17	17	17	1.61224	0.477628	0.708333	-0.34484	0.9	-0.105361	0.707071	-0.346625	0.6875	-0.374693	1.15686	0.145712
122321	30	39	0	1	1	0	18.75	0	1	1	1	0	0	0	0	0	0	0	0	0	0	1.26	0.55	0.9	0.66	0.5	1.21	13	13	13	18	18	18	1.28571	0.251314	0.572917	-0.557015	0.9	-0.105361	0.666667	-0.405465	0.531915	-0.631272	1.15238	0.14183
273764	29	38	1	1	1	1	17.7988	0	0	1	0	0	0	0	0	0	0	1	0	0	0	0.78	1.16	0.8	1.2	1.76	1.44	11	11	11	15	15	15	0.821053	-0.197168	1.18367	0.168623	0.8	-0.223144	1.2	0.182322	1.69231	0.526093	1.46939	0.384846
275274	37	40	0	1	1	1	23.833	0	0	0	0	0	0	0	0	0	0	1	0	0	0	0.29	0.76	0.9	1.07	1	1.25	12	12	12	16	16	16	0.295918	-1.21767	0.791667	-0.233615	0.9	-0.105361	1.08081	0.077709	1.0101	0.0100503	1.23762	0.213193
275285	33	39	0	1	1	0	19.91	0	0	1	0	0	0	0	0	0	0	1	0	0	0	1.06	0.93	1	1.37	1.14	0.92	12	12	12	16	16	16	1.08163	0.0784716	0.96875	-0.0317487	1	0	1.38384	0.324861	1.15152	0.141079	0.910891	-0.0933319
275286	31	39	1	1	1	1	24.3948	0	1	1	0	0	0	0	0	0	0	0	0	0	0	1.78	0.62	0.8	1.08	0.39	1.29	13	13	13	17	17	17	1.81633	0.596816	0.645833	-0.437214	0.8	-0.223144	1.09091	0.0870114	0.40625	-0.900787	1.26471	0.23484
274752	32	39	1	1	1	1	20.6868	0	1	1	0	0	0	0	0	1	0	0	0	0	0	2.11	3.36	0.9	1.41	2.43	0.86	13	13	13	18	18	18	2.15306	0.766891	3.5	1.25276	0.9	-0.105361	1.42424	0.35364	2.58511	0.949767	0.819048	-0.199613
274788	27	39	1	1	1	1	22.1329	0	0	0	0	0	0	0	0	0	0	1	0	0	0	0.9	0.35	0.8	1.07	0.37	1.31	14	14	14	18	18	18	0.857143	-0.154151	0.376344	-0.977251	0.8	-0.223144	1.08081	0.077709	0.393617	-0.932377	1.24762	0.221237
121021	34	37	1	1	1	0	23.2978	0	1	0	0	0	0	0	0	0	0	1	0	0	0	0.75	0.68	1.1	1.32	0.84	0.92	12	12	12	16	16	16	0.765306	-0.267479	0.708333	-0.34484	1.1	0.0953102	1.33333	0.287682	0.848485	-0.164303	0.910891	-0.0933319
274829	23	32	1	1	1	1	16.3847	0	0	0	0	1	1	1	0	0	0	0	0	0	0	0.61	0.43	1.3	1.12	0.4	1.09	12	12	12	17	17	17	0.622449	-0.474094	0.447917	-0.803148	1.3	0.262364	1.13131	0.123379	0.416667	-0.875469	1.06863	0.0663751
274884	27	39	1	1	1	1	18.7305	0	0	0	0	0	0	0	0	0	0	0	0	0	0	1.35	0.96	1	0.83	0.72	0.9	12	12	12	16	16	16	1.37755	0.320307	1	0	1	0	0.838384	-0.176279	0.727273	-0.318454	0.891089	-0.115311
273548	27	39	1	1	1	1	24.3046	0	0	0	0	0	0	0	0	0	0	1	0	0	0	2.29	2.04	1.2	0.73	1.93	1.36	12	12	12	17	17	17	2.33673	0.848755	2.125	0.753772	1.2	0.182322	0.737374	-0.30466	2.01042	0.698342	1.33333	0.287682
274891	27	38	0	1	0	1	18.0662	0	0	0	0	0	0	0	0	0	0	1	0	0	0	1.42	1.4	0.8	1.33	0.91	0.99	12	12	12	18	18	18	1.44898	0.37086	1.45833	0.377294	0.8	-0.223144	1.34343	0.295229	0.968085	-0.0324353	0.942857	-0.0588405
274895	34	39	1	1	1	1	18.2563	0	0	0	0	0	0	0	0	0	0	0	0	0	0	0.66	0.69	1.1	0.87	0.78	1.27	13	13	13	17	17	17	0.673469	-0.395313	0.71875	-0.330242	1.1	0.0953102	0.878788	-0.129212	0.8125	-0.207639	1.2451	0.219214
274939	33	40	1	1	0	1	21.6413	0	1	0	1	0	0	0	0	0	0	0	0	0	0	1.26	1.7	0.9	1.58	2.01	1.46	13	13	13	15	15	15	1.28571	0.251314	1.77083	0.57145	0.9	-0.105361	1.58	0.457425	1.93269	0.658914	1.4898	0.398639
272919	33	39	1	1	1	1	26.4381	0	0	1	0	0	0	0	0	0	0	0	0	0	0	0.54	0.17	1.5	1.14	0.26	1.34	12	12	12	16	16	16	0.55102	-0.595983	0.177083	-1.73113	1.5	0.405465	1.15152	0.141079	0.262626	-1.33702	1.32673	0.282719
191281	31	37	1	1	1	1	27.2392	0	1	0	1	0	0	0	0	0	0	1	0	0	0	0.67	0.54	0.9	0.85	0.68	0.73	13	13	13	17	17	17	0.683673	-0.380275	0.5625	-0.575364	0.9	-0.105361	0.858586	-0.152469	0.708333	-0.34484	0.715686	-0.334513
226607	29	38	1	1	0	0	23.4632	0	1	0	0	0	0	0	0	1	0	0	0	0	0	1.26	0.8	1.3	1	1.12	1.28	12	12	12	16	16	16	1.28571	0.251314	0.833333	-0.182322	1.3	0.262364	1.0101	0.0100503	1.13131	0.123379	1.26733	0.23691
275029	25	40	0	1	0	0	19.3954	0	1	1	0	0	0	0	0	0	0	0	0	0	0	1.52	0.99	0.7	1.15	1.21	1.36	13	13	13	16	16	16	1.55102	0.438913	1.03125	0.0307717	0.7	-0.356675	1.16162	0.149812	1.22222	0.200671	1.34653	0.297534
275099	25	38	0	1	1	1	17.4818	0	0	1	1	0	0	0	0	0	0	0	0	0	0	1.19	1.25	0.9	0.89	1.41	0.96	12	12	12	16	16	16	1.21429	0.194156	1.30208	0.263966	0.9	-0.105361	0.89899	-0.106483	1.42424	0.35364	0.950495	-0.0507723
275102	31	40	0	1	1	1	17.8465	0	0	0	0	0	0	0	0	0	0	0	0	0	0	0.56	1.55	1.1	0.74	2.13	0.94	13	13	13	18	18	18	0.571429	-0.559616	1.61458	0.479077	1.1	0.0953102	0.747475	-0.291055	2.26596	0.817997	0.895238	-0.110666
141955	32	39	0	1	1	1	19.8959	0	1	1	0	0	0	0	0	1	0	0	0	0	0	1.14	1.77	1.2	1.36	1.58	1.21	12	12	12	16	16	16	1.16327	0.151231	1.84375	0.611802	1.2	0.182322	1.37374	0.317535	1.59596	0.467475	1.19802	0.18067
274493	28	40	1	1	1	1	21.9671	0	1	0	0	0	0	0	0	0	0	0	0	0	0	1.35	0.52	0.9	0.68	0.71	0.94	13	13	13	16	16	16	1.37755	0.320307	0.541667	-0.613104	0.9	-0.105361	0.686869	-0.375612	0.717172	-0.33244	0.930693	-0.0718257
273733	31	38	1	1	1	1	31.6456	0	0	0	0	0	0	0	0	0	0	1	0	0	0	0.37	1.48	1.1	1.12	2.12	0.85	12	12	12	16	16	16	0.377551	-0.97405	1.54167	0.432864	1.1	0.0953102	1.13131	0.123379	2.14141	0.761466	0.841584	-0.172469
274558	31	38	1	1	1	1	20.2763	0	0	0	1	0	0	0	0	0	0	0	0	0	0	0.84	1.16	0.9	1.83	1.93	1.24	12	12	12	16	16	16	0.857143	-0.154151	1.20833	0.189242	0.9	-0.105361	1.84848	0.614366	1.94949	0.66757	1.22772	0.205161
159766	30	41	1	1	1	1	19.7266	0	1	0	0	0	0	0	0	0	0	0	0	0	0	0.92	2.19	0.9	1.65	1.77	1.31	12	12	12	17	17	17	0.938776	-0.0631789	2.28125	0.824724	0.9	-0.105361	1.66667	0.510826	1.84375	0.611802	1.28431	0.250225
273770	27	38	1	1	1	0	18.026	0	0	1	0	0	0	0	0	0	0	0	0	0	0	0.51	1.4	0.7	1.35	0.99	1.15	12	12	12	16	16	16	0.520408	-0.653142	1.45833	0.377294	0.7	-0.356675	1.36364	0.310155	1	0	1.13861	0.129812
273773	29	38	1	1	1	1	24.0346	0	0	1	0	0	0	0	0	0	0	1	0	0	0	0.79	1.45	0.7	1.02	1.37	1.26	12	12	12	16	16	16	0.806122	-0.21552	1.51042	0.412386	0.7	-0.356675	1.0303	0.029853	1.38384	0.324861	1.24752	0.221161
273782	31	40	0	1	0	1	18.369	0	1	1	1	0	0	0	0	0	0	1	0	0	0	1.44	1.02	0.8	0.75	0.54	1.3	13	13	13	18	18	18	1.46939	0.384846	1.0625	0.0606246	0.8	-0.223144	0.757576	-0.277632	0.574468	-0.554311	1.2381	0.213574
158174	29	38	0	0	1	1	19.7239	0	1	0	0	0	0	0	0	0	0	0	0	0	0	0.68	0.36	0.8	1.01	0.6	1.24	12	12	12	16	16	16	0.693878	-0.36546	0.375	-0.980829	0.8	-0.223144	1.0202	0.0200007	0.606061	-0.500775	1.22772	0.205161
275592	28	40	0	1	1	1	18.75	0	0	0	0	0	0	0	0	0	0	0	0	0	0	1.23	1.26	1.1	0.78	1.15	0.78	12	12	12	17	17	17	1.2551	0.227217	1.3125	0.271934	1.1	0.0953102	0.787879	-0.238411	1.19792	0.180584	0.764706	-0.268264
181442	29	40	1	1	0	0	27.7767	0	1	1	1	0	0	0	0	1	0	1	0	1	0	0.79	0.6	1	1.19	0.53	0.97	13	13	13	16	16	16	0.806122	-0.21552	0.625	-0.470004	1	0	1.20202	0.184004	0.535354	-0.624828	0.960396	-0.0404095
273796	24	40	0	1	1	1	17.8506	0	0	1	1	0	0	0	0	0	0	0	0	0	0	0.82	1.15	1	1.03	1.72	1.19	12	12	12	16	16	16	0.836735	-0.178248	1.19792	0.180584	1	0	1.0404	0.0396091	1.73737	0.552375	1.17822	0.164003
273797	24	39	0	1	0	1	19.1111	0	0	1	0	0	0	0	0	0	0	1	0	0	0	1.66	1.54	0.9	0.82	1.62	1.37	12	12	12	16	16	16	1.69388	0.52702	1.60417	0.472604	0.9	-0.105361	0.828283	-0.188401	1.63636	0.492476	1.35644	0.30486
273824	26	39	1	1	1	0	20.0288	0	0	1	1	0	0	0	0	0	0	1	0	0	0	0.5	0.75	1.1	0.88	0.9	1.15	12	12	12	17	17	17	0.510204	-0.672944	0.78125	-0.24686	1.1	0.0953102	0.888889	-0.117783	0.9375	-0.0645385	1.12745	0.119959
273859	26	40	1	1	0	0	19.8347	0	0	0	1	0	0	0	0	0	0	1	0	0	0	0.72	0.88	0.9	1.06	1.05	0.96	12	12	12	15	15	15	0.734694	-0.308301	0.916667	-0.0870114	0.9	-0.105361	1.06	0.0582689	1.00962	0.00956945	0.979592	-0.0206193
275364	28	39	0	1	1	1	22.8329	0	0	0	0	0	0	0	0	0	0	0	0	0	0	0.99	1.94	1	1.01	1.14	0.97	13	13	13	17	17	17	1.0102	0.0101524	2.02083	0.70351	1	0	1.0202	0.0200007	1.1875	0.17185	0.95098	-0.0502618
275373	27	40	0	1	1	1	19.3136	0	0	0	0	0	0	0	0	0	0	0	0	0	0	1.52	2.09	1.2	1.35	2.34	1.22	12	12	12	16	16	16	1.55102	0.438913	2.17708	0.777986	1.2	0.182322	1.36364	0.310155	2.36364	0.860201	1.20792	0.188901
275420	32	39	1	1	1	1	18.0141	0	0	0	0	0	0	0	0	0	0	0	0	0	0	0.55	0.99	0.7	1.29	1.53	0.7	12	12	12	17	17	17	0.561224	-0.577634	1.03125	0.0307717	0.7	-0.356675	1.30303	0.264693	1.59375	0.46609	0.686275	-0.376478
275449	20	39	0	1	0	0	20.83	0	1	0	0	0	0	0	0	0	0	0	0	0	0	1.89	1.54	1	0.72	1.38	0.99	12	12	12	17	17	17	1.92857	0.65678	1.60417	0.472604	1	0	0.727273	-0.318454	1.4375	0.362905	0.970588	-0.029853
228650	33	39	1	1	1	1	24.7768	0	1	0	0	0	0	0	0	0	0	0	0	0	0	0.75	0.66	1.4	1.09	0.81	1.23	12	12	12	16	16	16	0.765306	-0.267479	0.6875	-0.374693	1.4	0.336472	1.10101	0.096228	0.818182	-0.200671	1.21782	0.197064
189707	29	39	1	1	1	1	19.313	0	1	0	0	0	0	0	0	0	0	0	0	0	0	0.87	0.57	0.5	2.65	1.31	0.78	12	12	12	16	16	16	0.887755	-0.119059	0.59375	-0.521297	0.5	-0.693147	2.67677	0.98461	1.32323	0.280077	0.772277	-0.258412
192021	31	39	0	1	1	0	20.9644	0	1	0	0	0	0	0	0	0	0	1	0	0	0	1.11	1.24	1.1	1.65	1.57	0.91	12	12	12	17	17	17	1.13265	0.124563	1.29167	0.255933	1.1	0.0953102	1.66667	0.510826	1.63542	0.491898	0.892157	-0.114113
272953	31	37	1	1	1	1	17.5763	0	1	0	0	0	0	0	0	0	0	0	0	0	0	0.7	1.77	1	0.98	2.28	1.02	13	13	13	17	17	17	0.714286	-0.336472	1.84375	0.611802	1	0	0.989899	-0.0101524	2.375	0.864997	1	0
275031	25	39	0	1	0	1	26.3465	0	0	1	0	0	0	0	0	0	0	0	0	0	0	0.52	0.57	0.7	0.76	0.48	1.16	12	12	12	17	17	17	0.530612	-0.633724	0.59375	-0.521297	0.7	-0.356675	0.767677	-0.264387	0.5	-0.693147	1.13725	0.128617
246948	22	41	1	1	1	1	19.0274	0	1	1	1	0	0	0	0	0	0	0	0	0	0	0.6	0.4	0.8	0.71	0.5	1.18	13	13	13	18	18	18	0.612245	-0.490623	0.416667	-0.875469	0.8	-0.223144	0.717172	-0.33244	0.531915	-0.631272	1.12381	0.116724
276555	38	39	0	1	0	1	22.9719	0	1	0	0	0	0	0	0	0	0	0	0	0	0	2.62	1.18	1	1	1.22	1.13	12	12	12	16	16	16	2.67347	0.983377	1.22917	0.206336	1	0	1.0101	0.0100503	1.23232	0.208901	1.11881	0.112267
194427	33	40	1	1	1	0	23.681	0	1	0	0	0	0	0	0	0	0	0	0	0	0	0.5	0.47	0.8	0.97	0.4	0.88	13	13	13	18	18	18	0.510204	-0.672944	0.489583	-0.714201	0.8	-0.223144	0.979798	-0.0204089	0.425532	-0.854415	0.838095	-0.176624
276632	26	39	0	1	1	1	19.4674	0	1	0	0	0	0	0	0	1	0	0	0	0	0	1.02	0.73	1.1	1.49	0.85	0.77	12	12	12	16	16	16	1.04082	0.0400053	0.760417	-0.273889	1.1	0.0953102	1.50505	0.408826	0.858586	-0.152469	0.762376	-0.271315
276395	28	39	0	1	0	1	19.5184	0	0	0	0	0	0	0	0	0	0	1	0	0	0	1.32	0.76	1	1.07	0.65	1.16	12	12	12	16	16	16	1.34694	0.297834	0.791667	-0.233615	1	0	1.08081	0.077709	0.656566	-0.420733	1.14851	0.13847
276434	35	38	0	1	1	1	20.0777	0	0	1	1	0	0	0	0	0	0	1	0	0	0	0.74	2.07	0.6	1.01	2.08	1.1	12	12	12	16	16	16	0.755102	-0.280902	2.15625	0.768371	0.6	-0.510826	1.0202	0.0200007	2.10101	0.742418	1.08911	0.0853598
276444	31	41	1	1	1	1	21.4844	0	1	1	0	0	0	0	0	0	0	0	0	0	0	0.58	0.95	1	1.18	1.07	1.16	13	13	13	17	17	17	0.591837	-0.524524	0.989583	-0.0104713	1	0	1.19192	0.175565	1.11458	0.108481	1.13725	0.128617
276013	32	38	0	1	1	1	18.662	0	1	1	0	0	0	0	0	0	0	0	0	0	0	2.06	0.45	0.7	1	0.56	1.29	12	12	12	16	16	16	2.10204	0.742909	0.46875	-0.757686	0.7	-0.356675	1.0101	0.0100503	0.565657	-0.569768	1.27723	0.244692
235238	25	41	1	1	0	0	20.7031	0	1	0	0	0	0	0	0	0	0	0	0	0	0	1.32	0.72	0.9	1.26	0.77	1.25	12	12	12	16	16	16	1.34694	0.297834	0.75	-0.287682	0.9	-0.105361	1.27273	0.241162	0.777778	-0.251314	1.23762	0.213193
251697	30	38	0	1	1	1	23.5304	1	0	1	1	0	0	0	0	0	0	1	0	0	0	1.83	0.87	1	1.01	1.17	1.48	12	12	12	17	17	17	1.86735	0.624519	0.90625	-0.0984401	1	0	1.0202	0.0200007	1.21875	0.197826	1.45098	0.372239
277243	29	39	1	1	1	1	19.3715	0	0	0	0	0	0	0	0	0	0	0	0	0	0	2.33	2.11	1.3	1.07	1.62	1.06	12	12	12	16	16	16	2.37755	0.866071	2.19792	0.78751	1.3	0.262364	1.08081	0.077709	1.63636	0.492476	1.0495	0.0483186
184839	34	40	1	1	0	1	20.7285	0	1	0	1	0	0	0	0	0	0	0	0	0	0	1.93	0.51	0.9	1.71	0.72	0.55	13	13	13	17	17	17	1.96939	0.677723	0.53125	-0.632523	0.9	-0.105361	1.72727	0.546544	0.75	-0.287682	0.539216	-0.61764
274469	28	39	0	1	1	1	14.8213	0	0	0	0	0	0	0	0	0	0	0	0	0	0	1.94	1.32	0.9	1.61	2.51	0.85	12	12	12	16	16	16	1.97959	0.682891	1.375	0.318454	0.9	-0.105361	1.62626	0.486285	2.53535	0.930333	0.841584	-0.172469
227227	23	39	0	1	1	1	18.6198	0	1	0	0	0	0	0	0	0	0	0	0	0	0	0.38	0.53	0.8	0.64	0.46	1.12	12	12	12	16	16	16	0.387755	-0.947381	0.552083	-0.594056	0.8	-0.223144	0.646465	-0.436237	0.464646	-0.766478	1.10891	0.103378
157335	30	39	1	1	1	1	19.1406	0	1	0	0	0	0	0	0	0	0	0	0	0	0	0.53	1.18	1.4	1.11	1.26	0.79	12	12	12	16	16	16	0.540816	-0.614676	1.22917	0.206336	1.4	0.336472	1.12121	0.11441	1.27273	0.241162	0.782178	-0.245673
275372	30	39	1	1	1	1	22.7694	0	0	1	0	0	0	0	0	0	0	0	0	0	0	0.75	0.8	0.7	1.04	0.84	1.24	12	12	12	16	16	16	0.765306	-0.267479	0.833333	-0.182322	0.7	-0.356675	1.05051	0.049271	0.848485	-0.164303	1.22772	0.205161
276003	23	38	1	1	1	1	18.9349	0	0	0	1	0	0	0	0	0	0	0	0	0	0	1.05	0.84	1.2	0.8	0.89	1.02	13	13	13	17	17	17	1.07143	0.0689929	0.875	-0.133531	1.2	0.182322	0.808081	-0.213093	0.927083	-0.0757118	1	0
276458	29	38	0	1	1	1	20.0288	0	0	0	0	0	0	0	0	0	0	0	0	0	0	1.33	1.39	1.1	0.89	1.27	1.07	12	12	12	20	20	20	1.35714	0.305382	1.44792	0.370126	1.1	0.0953102	0.881188	-0.126484	1.38043	0.322399	1	0
188562	26	40	0	1	0	1	19.2277	0	1	0	1	0	0	0	0	0	0	0	0	0	0	1.33	1.74	1	1.32	1.84	1.31	12	12	12	17	17	17	1.35714	0.305382	1.8125	0.594707	1	0	1.33333	0.287682	1.91667	0.650588	1.28431	0.250225
276303	30	39	1	1	0	0	23.3333	0	1	1	1	0	0	0	0	1	0	0	0	0	0	1.45	0.98	1.3	1.16	1.01	1.01	12	12	12	16	16	16	1.47959	0.391766	1.02083	0.0206193	1.3	0.262364	1.17172	0.15847	1.0202	0.0200007	1	0
276310	31	37	1	1	0	1	19.1436	0	1	0	0	0	0	0	0	1	0	0	0	0	0	1.23	0.55	0.7	0.91	0.66	0.94	11	11	11	15	15	15	1.29474	0.258307	0.561224	-0.577634	0.7	-0.356675	0.91	-0.0943107	0.634615	-0.454736	0.959184	-0.0416727
164537	32	41	1	1	0	1	22.8374	0	1	0	1	0	0	0	0	0	0	0	0	0	0	1.88	2.54	1.1	1.37	1.34	1.18	13	13	13	16	16	16	1.91837	0.651474	2.64583	0.972986	1.1	0.0953102	1.38384	0.324861	1.35354	0.30272	1.16832	0.155564
276314	24	38	1	1	0	1	16.774	0	1	0	1	0	0	0	0	1	0	0	0	0	0	2.69	1.93	1	1.13	0.83	0.87	13	13	13	17	17	17	2.7449	1.00974	2.01042	0.698342	1	0	1.14141	0.132268	0.864583	-0.145508	0.852941	-0.159065
275134	27	39	1	1	1	1	23.1842	0	0	0	0	0	0	0	0	0	0	1	0	0	0	0.61	0.75	1	0.98	1.23	0.81	12	12	12	16	16	16	0.622449	-0.474094	0.78125	-0.24686	1	0	0.989899	-0.0101524	1.24242	0.217065	0.80198	-0.220671
173889	31	40	0	1	1	1	20.83	0	1	0	0	0	0	0	0	0	0	0	0	0	0	1.23	1.49	1.1	0.64	1.53	1.43	14	14	14	18	18	18	1.17143	0.158224	1.60215	0.471347	1.1	0.0953102	0.646465	-0.436237	1.62766	0.487143	1.3619	0.308884
274795	24	39	1	1	1	1	21.7555	0	0	0	1	0	0	0	0	0	0	0	0	0	0	1.21	1.24	0.9	1.11	1.05	1.01	14	14	14	17	17	17	1.15238	0.14183	1.33333	0.287682	0.9	-0.105361	1.12121	0.11441	1.09375	0.0896122	0.990196	-0.0098523
275177	36	38	0	1	1	1	23.3876	0	1	0	0	0	0	0	0	1	0	0	0	0	0	1.37	1.01	1.1	0.77	1.22	0.99	11	11	11	16	16	16	1.44211	0.366104	1.03061	0.030153	1.1	0.0953102	0.777778	-0.251314	1.23232	0.208901	0.980198	-0.0200007
157406	34	38	0	1	0	1	21.4536	0	1	0	1	0	0	0	0	0	0	0	0	0	0	0.76	2.1	1.1	1.6	2.71	0.99	13	13	13	17	17	17	0.77551	-0.254234	2.1875	0.782759	1.1	0.0953102	1.61616	0.480054	2.82292	1.03777	0.970588	-0.029853
275213	24	40	0	1	1	1	17.7462	0	0	1	1	0	0	0	0	0	0	0	0	0	0	1.4	0.57	1.3	0.48	0.53	1.42	12	12	12	17	17	17	1.42857	0.356675	0.59375	-0.521297	1.3	0.262364	0.484848	-0.723919	0.552083	-0.594056	1.39216	0.330854
276933	32	39	0	1	0	1	16.2155	0	1	1	1	0	0	0	0	0	0	0	0	0	0	1.26	1.25	1.2	1.43	0.92	1.2	12	12	12	16	16	16	1.28571	0.251314	1.30208	0.263966	1.2	0.182322	1.44444	0.367725	0.929293	-0.0733313	1.18812	0.172371
149029	29	39	0	1	0	0	22.9035	0	1	1	1	0	0	0	0	1	0	1	0	0	0	0.76	2.15	0.9	0.8	2.78	1.24	13	13	13	16	16	16	0.77551	-0.254234	2.23958	0.80629	0.9	-0.105361	0.808081	-0.213093	2.80808	1.0325	1.22772	0.205161
237386	26	39	0	1	1	1	21.9138	0	1	0	0	0	0	0	0	0	0	1	0	0	0	1.31	1.28	1	1.52	0.83	1.25	12	12	12	16	16	16	1.33673	0.29023	1.33333	0.287682	1	0	1.53535	0.428761	0.838384	-0.176279	1.23762	0.213193
275858	29	39	0	1	1	1	22.5827	0	1	0	1	0	0	0	0	0	0	1	0	0	0	0.95	1.85	0.7	0.67	1.17	0.77	12	12	12	17	17	17	0.969388	-0.0310906	1.92708	0.656008	0.7	-0.356675	0.676768	-0.390427	1.21875	0.197826	0.754902	-0.281167
201040	26	38	0	1	0	1	16.4062	0	1	0	1	0	0	0	0	0	0	0	0	0	0	1.11	2.86	1	1.36	2.47	1.06	12	12	12	17	17	17	1.13265	0.124563	2.97917	1.09164	1	0	1.37374	0.317535	2.57292	0.94504	1.03922	0.0384663
275902	25	40	0	1	1	1	18.026	0	0	0	0	0	0	0	0	0	0	0	0	0	0	0.65	0.38	1.1	0.8	0.58	0.98	13	13	13	17	17	17	0.663265	-0.41058	0.395833	-0.926762	1.1	0.0953102	0.808081	-0.213093	0.604167	-0.503905	0.960784	-0.0400053
275904	30	37	0	1	1	1	19.91	0	0	1	1	0	0	0	0	0	0	0	0	1	0	0.88	0.87	0.7	1.2	1.02	0.62	12	12	12	17	17	17	0.897959	-0.107631	0.90625	-0.0984401	0.7	-0.356675	1.21212	0.192372	1.0625	0.0606246	0.607843	-0.497838
276435	30	40	1	1	0	1	21.6395	0	1	1	1	0	0	0	0	1	0	0	0	0	0	1.12	0.31	0.8	0.77	0.4	0.92	12	12	12	16	16	16	1.14286	0.133531	0.322917	-1.13036	0.8	-0.223144	0.777778	-0.251314	0.40404	-0.90624	0.910891	-0.0933319
276443	25	39	1	1	1	0	23.6994	0	1	0	0	0	0	0	0	1	0	0	0	0	0	1.24	1.6	0.7	1.34	1.22	1.03	12	12	12	18	18	18	1.26531	0.235314	1.66667	0.510826	0.7	-0.356675	1.35354	0.30272	1.29787	0.260726	0.980952	-0.0192314
276448	32	39	0	1	1	1	16.7311	0	0	1	1	0	0	0	1	0	0	0	0	0	0	1.54	0.53	1	1.62	0.5	1.49	12	12	12	16	16	16	1.57143	0.451985	0.552083	-0.594056	1	0	1.63636	0.492476	0.505051	-0.683097	1.47525	0.388826
276492	30	39	0	1	1	0	27.0552	0	1	1	1	0	0	0	0	1	0	0	0	0	0	0.61	1.89	0.7	0.56	1.29	0.82	12	12	12	17	17	17	0.622449	-0.474094	1.96875	0.677399	0.7	-0.356675	0.565657	-0.569768	1.34375	0.295464	0.803922	-0.218254
276550	26	39	1	0	0	0	16.8889	0	0	1	1	0	0	0	0	0	0	0	0	0	0	1.65	1.46	1.1	0.75	0.91	1.2	13	13	13	17	17	17	1.68367	0.520978	1.52083	0.419258	1.1	0.0953102	0.757576	-0.277632	0.947917	-0.0534887	1.17647	0.162519
138461	32	41	1	1	0	0	20.1956	1	1	0	1	0	0	0	0	0	0	0	0	0	0	1.48	0.81	1.2	1.01	0.68	1.28	12	12	12	17	17	17	1.5102	0.412245	0.84375	-0.169899	1.2	0.182322	1.0202	0.0200007	0.708333	-0.34484	1.2549	0.227057
275640	20	40	0	1	0	1	16.937	0	0	0	0	0	0	0	0	0	0	0	0	0	0	1.19	0.79	0.7	1.41	1.04	1.29	12	12	12	16	16	16	1.21429	0.194156	0.822917	-0.1949	0.7	-0.356675	1.42424	0.35364	1.05051	0.049271	1.27723	0.244692
275678	30	39	1	1	1	1	19.1832	0	0	1	0	0	0	0	0	0	0	1	0	0	0	2.36	2.78	1.2	0.55	2.01	1.04	12	12	12	16	16	16	2.40816	0.878864	2.89583	1.06327	1.2	0.182322	0.555556	-0.587787	2.0303	0.708185	1.0297	0.0292704
238125	30	39	0	1	1	1	16.8475	0	1	0	0	0	0	0	0	0	0	0	0	0	0	0.76	1.28	1.1	0.89	0.56	1.2	12	12	12	18	18	18	0.77551	-0.254234	1.33333	0.287682	1.1	0.0953102	0.89899	-0.106483	0.595745	-0.517943	1.14286	0.133531
273128	29	40	0	1	1	1	26.8136	0	1	0	0	0	0	0	0	0	0	0	0	0	0	0.69	0.44	0.9	0.95	0.99	1.09	12	12	12	18	18	18	0.704082	-0.350861	0.458333	-0.780159	0.9	-0.105361	0.959596	-0.041243	1.05319	0.0518251	1.0381	0.0373875
275205	26	38	1	1	0	1	18.6709	0	0	1	1	0	0	0	0	0	0	0	0	0	0	0.66	0.74	0.6	0.99	1.1	1.39	13	13	13	16	16	16	0.673469	-0.395313	0.770833	-0.260283	0.6	-0.510826	1	0	1.11111	0.105361	1.37624	0.319353
275250	26	39	1	1	0	1	16.6133	0	0	0	1	0	0	0	0	0	0	0	0	0	0	1.34	0.88	0.6	0.88	0.78	0.88	12	12	12	17	17	17	1.36735	0.312872	0.916667	-0.0870114	0.6	-0.510826	0.888889	-0.117783	0.8125	-0.207639	0.862745	-0.147636
276506	27	38	0	1	1	1	19.8141	0	0	1	0	0	0	0	0	0	0	0	0	0	0	0.7	0.99	1.4	0.74	0.67	1.01	12	12	12	16	16	16	0.714286	-0.336472	1.03125	0.0307717	1.4	0.336472	0.747475	-0.291055	0.676768	-0.390427	1	0
264195	25	37	0	1	1	1	20.7031	0	0	1	1	0	0	0	0	0	0	0	0	0	0	1.23	3.06	0.9	0.91	2.04	0.85	12	12	12	16	16	16	1.2551	0.227217	3.1875	1.15924	0.9	-0.105361	0.919192	-0.0842603	2.06061	0.723	0.841584	-0.172469
276528	27	40	1	0	1	1	21.9899	0	0	0	0	0	0	0	0	0	0	0	0	0	0	1.7	0.37	1.1	1.05	0.55	1.37	12	12	12	16	16	16	1.73469	0.550831	0.385417	-0.95343	1.1	0.0953102	1.06061	0.0588405	0.555556	-0.587787	1.35644	0.30486
276537	28	40	0	1	0	1	21.232	0	0	1	1	0	0	0	0	0	0	0	0	0	0	1.46	1.51	1.6	0.5	1.02	1.18	11	11	11	16	16	16	1.53684	0.42973	1.54082	0.432312	1.6	0.470004	0.505051	-0.683097	1.0303	0.029853	1.16832	0.155564
182893	25	39	1	1	0	1	15.625	0	1	1	1	0	0	0	0	1	0	0	0	0	0	1.33	1.69	1	0.89	1.29	1.04	12	12	12	16	16	16	1.35714	0.305382	1.76042	0.565551	1	0	0.89899	-0.106483	1.30303	0.264693	1.0297	0.0292704
158597	33	33	1	1	1	1	26.4381	0	1	1	1	1	1	1	0	0	0	0	0	0	0	1.43	0.54	0.6	0.82	0.96	0.93	12	12	12	16	16	16	1.45918	0.377877	0.5625	-0.575364	0.6	-0.510826	0.828283	-0.188401	0.969697	-0.0307717	0.920792	-0.082521
258431	26	38	1	1	1	1	24.6793	0	0	1	0	0	0	0	0	0	0	1	0	0	0	0.76	0.9	0.8	1.4	0.85	0.75	13	13	13	17	17	17	0.77551	-0.254234	0.9375	-0.0645385	0.8	-0.223144	1.41414	0.346523	0.885417	-0.121697	0.735294	-0.307485
228297	35	39	1	1	1	1	18.7328	0	1	1	0	0	0	0	0	0	0	0	0	0	0	0.64	1.09	0.9	0.82	0.99	1.02	13	13	13	17	17	17	0.653061	-0.426084	1.13542	0.127	0.9	-0.105361	0.828283	-0.188401	1.03125	0.0307717	1	0
247234	22	38	1	1	0	0	23.3355	0	1	1	1	0	0	0	0	0	0	0	0	0	0	0.8	0.6	0.8	1.51	0.58	1.4	12	12	12	18	18	18	0.816327	-0.202941	0.625	-0.470004	0.8	-0.223144	1.52525	0.42216	0.617021	-0.482852	1.33333	0.287682
275215	25	39	1	1	1	1	19.8413	0	0	1	1	0	0	0	0	0	0	0	0	0	0	1.04	1.46	0.9	1.5	1.6	1.59	12	12	12	17	17	17	1.06122	0.0594234	1.52083	0.419258	0.9	-0.105361	1.51515	0.415515	1.66667	0.510826	1.55882	0.443931
262778	34	39	0	1	1	0	20.0773	0	0	0	0	0	0	0	0	0	0	1	0	0	0	1.58	2.11	1.1	1.26	1.5	0.83	13	13	13	17	17	17	1.61224	0.477628	2.19792	0.78751	1.1	0.0953102	1.27273	0.241162	1.5625	0.446287	0.813725	-0.206132
275254	27	40	0	1	1	1	22.3133	0	0	1	1	0	0	0	0	0	0	0	0	0	0	1.36	0.39	0.9	0.89	0.52	0.91	11	11	11	15	15	15	1.43158	0.358778	0.397959	-0.921406	0.9	-0.105361	0.89	-0.116534	0.5	-0.693147	0.928571	-0.074108
276987	27	39	1	1	1	1	19.8347	0	0	1	0	0	0	0	0	0	0	0	0	0	0	0.67	0.44	0.8	0.67	0.61	0.91	13	13	13	17	17	17	0.683673	-0.380275	0.458333	-0.780159	0.8	-0.223144	0.676768	-0.390427	0.635417	-0.453474	0.892157	-0.114113
266462	31	39	0	0	1	0	21.4031	0	1	0	1	0	0	0	0	0	0	1	0	0	0	0.66	0.52	1	0.85	0.55	1.15	13	13	13	17	17	17	0.673469	-0.395313	0.541667	-0.613104	1	0	0.858586	-0.152469	0.572917	-0.557015	1.12745	0.119959
125645	32	40	1	1	1	0	20.9902	0	1	0	0	0	0	0	0	0	0	1	0	1	0	0.85	0.26	1.3	1.06	0.32	1.15	13	13	13	18	18	18	0.867347	-0.142316	0.270833	-1.30625	1.3	0.262364	1.07071	0.0683192	0.340426	-1.07756	1.09524	0.0909718
277079	35	39	1	1	1	1	23.3726	0	1	0	0	0	0	0	0	1	0	0	0	0	0	1.05	1.5	1.2	1.29	1.67	1.34	12	12	12	16	16	16	1.07143	0.0689929	1.5625	0.446287	1.2	0.182322	1.30303	0.264693	1.68687	0.522874	1.32673	0.282719
277091	28	38	0	1	0	0	23.9361	0	1	1	1	0	0	0	0	1	0	0	0	0	0	0.74	0.67	0.7	0.73	0.49	1.18	12	12	12	16	16	16	0.755102	-0.280902	0.697917	-0.359656	0.7	-0.356675	0.737374	-0.30466	0.494949	-0.7033	1.16832	0.155564
277096	34	39	0	1	1	1	23.4375	0	0	0	0	0	0	0	0	0	0	0	0	1	0	1.21	1.02	1.1	0.82	0.96	1.16	12	12	12	16	16	16	1.23469	0.210823	1.0625	0.0606246	1.1	0.0953102	0.828283	-0.188401	0.969697	-0.0307717	1.14851	0.13847
210315	37	39	0	1	1	1	21.4903	0	1	0	0	0	0	0	0	1	0	1	0	0	0	1.04	0.4	0.7	1.37	0.53	0.9	12	12	12	16	16	16	1.06122	0.0594234	0.416667	-0.875469	0.7	-0.356675	1.38384	0.324861	0.535354	-0.624828	0.891089	-0.115311
275951	26	40	0	1	0	1	17.6889	0	0	1	1	0	0	0	0	0	0	0	0	0	0	0.96	2	0.7	1.05	1.53	0.74	14	14	14	16	16	16	0.914286	-0.0896122	2.15054	0.765718	0.7	-0.356675	1.06061	0.0588405	1.54545	0.435318	0.732673	-0.311055
275956	26	39	0	1	1	1	20.512	0	0	0	0	0	0	0	0	0	0	0	0	0	0	1.8	0.91	1	1.06	1.06	1.27	12	12	12	16	16	16	1.83673	0.607989	0.947917	-0.0534887	1	0	1.07071	0.0683192	1.07071	0.0683192	1.25743	0.229067
197163	38	38	1	1	0	0	28.4444	0	1	0	0	0	0	0	0	1	0	1	0	0	0	0.53	0.54	1.2	0.84	0.87	0.91	12	12	12	16	16	16	0.540816	-0.614676	0.5625	-0.575364	1.2	0.182322	0.848485	-0.164303	0.878788	-0.129212	0.90099	-0.104261
277176	28	40	1	1	0	1	21.7687	0	0	0	1	0	0	0	0	0	0	0	0	0	0	0.96	0.99	1.3	0.86	1.01	1.46	13	13	13	16	16	16	0.979592	-0.0206193	1.03125	0.0307717	1.3	0.262364	0.868687	-0.140773	1.0202	0.0200007	1.44554	0.368486
277206	18	40	1	1	0	0	20.4294	0	0	1	1	0	0	0	0	0	0	1	0	0	0	0.65	2.48	0.9	0.8	2.15	1.45	12	12	12	17	17	17	0.663265	-0.41058	2.58333	0.949081	0.9	-0.105361	0.808081	-0.213093	2.23958	0.80629	1.42157	0.351761
277223	25	40	1	1	1	1	18.1449	0	0	0	0	0	0	0	0	0	0	0	0	0	0	1.19	1.26	1	1.92	1.19	1.01	12	12	12	16	16	16	1.21429	0.194156	1.3125	0.271934	1	0	1.93939	0.662376	1.20202	0.184004	1	0
267619	28	35	1	1	0	1	19.5776	0	0	0	0	1	0	1	0	0	0	0	0	0	0	1.78	1.88	1	1.28	2.01	1.11	12	12	12	16	16	16	1.81633	0.596816	1.95833	0.672094	1	0	1.29293	0.25691	2.0303	0.708185	1.09901	0.0944097
145490	34	38	0	1	0	1	20.0507	0	1	1	1	0	0	0	0	1	0	0	0	0	0	0.63	0.62	0.9	0.72	0.68	0.92	13	13	13	17	17	17	0.642857	-0.441833	0.645833	-0.437214	0.9	-0.105361	0.727273	-0.318454	0.708333	-0.34484	0.901961	-0.103184
274547	36	41	1	1	1	1	22.1453	0	1	1	1	0	0	0	0	0	0	0	0	0	0	0.37	1.26	1	1.09	1.35	1.06	13	13	13	18	18	18	0.377551	-0.97405	1.3125	0.271934	1	0	1.10101	0.096228	1.43617	0.36198	1.00952	0.00947874
160143	28	39	1	1	1	1	16.8241	0	0	1	0	0	0	0	1	0	0	0	0	0	0	1.36	1.47	0.7	1.44	1.01	0.78	12	12	12	16	16	16	1.38776	0.327687	1.53125	0.426084	0.7	-0.356675	1.45455	0.374693	1.0202	0.0200007	0.772277	-0.258412
183636	33	39	1	1	1	0	20.8889	0	1	0	0	0	0	0	0	0	0	0	0	0	0	0.79	1.45	1.1	0.99	1.47	1.15	12	12	12	16	16	16	0.806122	-0.21552	1.51042	0.412386	1.1	0.0953102	1	0	1.48485	0.395313	1.13861	0.129812
275766	31	39	1	1	0	0	28.5156	0	0	1	0	0	0	0	0	0	0	0	0	0	0	1.16	0.21	1	1.48	0.36	1.25	12	12	12	19	19	19	1.18367	0.168623	0.21875	-1.51983	1	0	1.49495	0.402092	0.367347	-1.00145	1.20192	0.183923
262335	28	39	1	1	1	1	20.9155	0	0	0	0	0	0	0	0	0	0	0	0	0	0	1.28	0.54	0.9	0.84	0.59	1.03	12	12	12	16	16	16	1.30612	0.267063	0.5625	-0.575364	0.9	-0.105361	0.848485	-0.164303	0.59596	-0.517582	1.0198	0.0196085
238824	27	39	1	1	1	1	23.681	0	1	1	1	0	0	0	0	0	0	1	0	0	0	0.62	0.5	1.1	0.75	0.33	1.75	12	12	12	16	16	16	0.632653	-0.457833	0.520833	-0.652325	1.1	0.0953102	0.757576	-0.277632	0.333333	-1.09861	1.73267	0.549665
190671	26	39	0	1	0	1	29.6158	0	1	1	1	0	0	0	0	1	0	0	0	0	0	0.47	2.66	1.2	0.66	1.86	1.18	12	12	12	16	16	16	0.479592	-0.73482	2.77083	1.01915	1.2	0.182322	0.666667	-0.405465	1.87879	0.630627	1.16832	0.155564
275257	34	41	0	1	0	1	16.7657	0	1	1	1	0	0	0	0	0	0	0	0	0	0	1.57	0.83	0.7	1.14	0.69	0.96	13	13	13	18	18	18	1.60204	0.471278	0.864583	-0.145508	0.7	-0.356675	1.15152	0.141079	0.734043	-0.309188	0.914286	-0.0896122
215049	26	39	0	1	0	1	15.917	0	1	1	0	0	0	0	0	0	0	0	0	0	0	0.79	0.35	1	0.6	0.33	1.14	12	12	12	16	16	16	0.806122	-0.21552	0.364583	-1.009	1	0	0.606061	-0.500775	0.333333	-1.09861	1.12871	0.121078
275346	30	39	1	1	1	1	20.0288	0	0	0	0	0	0	0	0	0	0	0	0	0	0	2.73	0.45	1	1.19	0.51	1.49	12	12	12	16	16	16	2.78571	1.0245	0.46875	-0.757686	1	0	1.20202	0.184004	0.515152	-0.663294	1.47525	0.388826
276551	31	38	1	1	1	0	18.369	0	0	0	0	0	0	0	1	0	0	0	0	0	0	0.87	0.65	1	1.27	0.9	1.64	12	12	12	16	16	16	0.887755	-0.119059	0.677083	-0.389961	1	0	1.28283	0.249067	0.909091	-0.0953102	1.62376	0.484746
273634	33	40	0	1	0	0	19.7055	0	1	0	0	0	0	0	0	0	0	0	0	0	0	0.6	0.95	0.7	1.47	1.96	1	13	13	13	17	17	17	0.612245	-0.490623	0.989583	-0.0104713	0.7	-0.356675	1.48485	0.395313	2.04167	0.713766	0.980392	-0.0198026
158187	32	39	0	1	1	1	23.2335	0	1	0	0	0	0	0	0	0	0	1	0	0	0	0.43	0.49	1	1.04	0.7	1.07	12	12	12	16	16	16	0.438776	-0.823767	0.510417	-0.672528	1	0	1.05051	0.049271	0.707071	-0.346625	1.05941	0.0577083
273687	23	39	1	1	0	0	17.2879	0	0	0	0	0	0	0	0	0	0	0	0	0	0	1.05	0.82	0.8	1.15	1.3	1.07	12	12	12	15	15	15	1.07143	0.0689929	0.854167	-0.157629	0.8	-0.223144	1.15	0.139762	1.25	0.223144	1.09184	0.0878614
275098	34	39	1	1	1	1	21.0938	0	1	1	1	0	0	0	0	0	0	0	0	0	0	1.16	1.68	1	1.08	2.28	1.07	13	13	13	17	17	17	1.18367	0.168623	1.75	0.559616	1	0	1.09091	0.0870114	2.375	0.864997	1.04902	0.047856
275141	22	38	0	1	1	1	19.5312	0	0	0	1	0	0	0	0	0	0	0	0	0	0	0.27	0.53	0.8	1.2	0.48	1.39	13	13	13	17	17	17	0.27551	-1.28913	0.552083	-0.594056	0.8	-0.223144	1.21212	0.192372	0.5	-0.693147	1.36275	0.309501
275193	30	39	1	1	1	1	18.7305	0	1	0	0	0	0	0	0	1	0	0	0	0	0	0.74	0.99	1.1	1.25	0.85	0.86	12	12	12	17	17	17	0.755102	-0.280902	1.03125	0.0307717	1.1	0.0953102	1.26263	0.233194	0.885417	-0.121697	0.843137	-0.170626
275246	30	36	1	1	1	1	17.0088	0	0	0	1	1	0	1	0	0	0	0	0	0	0	1.23	0.34	1.1	0.66	0.31	1.39	13	13	13	17	17	17	1.2551	0.227217	0.354167	-1.03799	1.1	0.0953102	0.666667	-0.405465	0.322917	-1.13036	1.36275	0.309501
274896	31	39	1	1	1	0	22.0324	0	0	1	0	0	0	0	0	0	0	0	0	0	0	1.01	0.67	0.9	1.28	1	1.16	13	13	13	17	17	17	1.03061	0.030153	0.697917	-0.359656	0.9	-0.105361	1.29293	0.25691	1.04167	0.040822	1.13725	0.128617
274930	28	38	1	1	1	1	21.0938	0	0	0	0	0	0	0	0	0	0	0	0	0	0	3.34	0.53	0.8	1.13	0.7	1.55	12	12	12	16	16	16	3.40816	1.22617	0.552083	-0.594056	0.8	-0.223144	1.14141	0.132268	0.707071	-0.346625	1.53465	0.428305
274937	25	39	0	1	0	1	17.5781	0	0	1	1	0	0	0	0	0	0	0	0	0	0	0.55	0.84	1.3	0.58	0.79	0.89	12	12	12	17	17	17	0.561224	-0.577634	0.875	-0.133531	1.3	0.262364	0.585859	-0.534677	0.822917	-0.1949	0.872549	-0.136336
128271	32	40	0	1	1	1	20.5693	0	1	0	0	0	0	0	0	0	0	0	0	0	0	3.54	1.16	0.6	1.58	0.94	1.36	13	13	13	18	18	18	3.61224	1.28433	1.20833	0.189242	0.6	-0.510826	1.59596	0.467475	1	0	1.29524	0.258695
207338	26	38	0	1	1	1	18.1641	0	1	0	1	0	0	0	0	0	0	0	0	0	0	0.66	1.43	1.2	0.74	1.17	1.06	11	11	11	15	15	15	0.694737	-0.364222	1.45918	0.377877	1.2	0.182322	0.74	-0.301105	1.125	0.117783	1.08163	0.0784716
262491	33	39	1	1	0	0	19.9219	0	1	1	1	0	0	0	0	1	0	1	0	0	0	1.77	0.53	1	0.99	0.54	1.13	13	13	13	17	17	17	1.80612	0.591182	0.552083	-0.594056	1	0	1	0	0.5625	-0.575364	1.10784	0.102415
274899	29	39	1	1	1	1	17.0656	0	0	1	0	0	0	0	0	0	0	0	0	1	0	2.6	1.07	0.8	1.1	0.97	0.58	12	12	12	16	16	16	2.65306	0.975714	1.11458	0.108481	0.8	-0.223144	1.11111	0.105361	0.979798	-0.0204089	0.574257	-0.554678
211803	30	39	0	1	0	1	19.1182	0	1	1	0	0	0	0	0	1	0	0	0	0	0	1.1	3.08	0.8	1.08	4.02	1.07	12	12	12	16	16	16	1.12245	0.115513	3.20833	1.16575	0.8	-0.223144	1.09091	0.0870114	4.06061	1.40133	1.05941	0.0577083
217547	24	38	0	1	0	0	22.3133	0	1	1	0	0	0	0	0	0	0	0	0	0	0	0.54	0.93	0.9	0.92	0.99	0.86	12	12	12	16	16	16	0.55102	-0.595983	0.96875	-0.0317487	0.9	-0.105361	0.929293	-0.0733313	1	0	0.851485	-0.160773
274687	33	39	1	1	1	1	17.6309	0	1	0	0	0	0	0	0	0	0	0	0	0	0	0.85	1.24	0.7	2.11	1.41	1.09	13	13	13	16	16	16	0.867347	-0.142316	1.29167	0.255933	0.7	-0.356675	2.13131	0.756738	1.42424	0.35364	1.07921	0.0762274
274853	30	38	1	1	1	1	24.8358	0	0	1	0	0	0	0	0	0	0	0	0	0	0	1.3	0.66	1.3	0.98	0.45	0.99	12	12	12	16	16	16	1.32653	0.282567	0.6875	-0.374693	1.3	0.262364	0.989899	-0.0101524	0.454545	-0.788457	0.980198	-0.0200007
260984	28	40	1	1	1	1	19.5312	0	1	0	0	0	0	0	0	0	0	0	0	0	0	2.63	0.56	1.3	0.7	0.7	1.42	12	12	12	16	16	16	2.68367	0.987187	0.583333	-0.538997	1.3	0.262364	0.707071	-0.346625	0.707071	-0.346625	1.40594	0.340707
244038	32	38	0	1	0	1	27.6398	1	1	1	0	0	0	0	0	1	0	0	0	0	0	1.47	1.8	0.7	1.2	2.44	1.28	13	13	13	16	16	16	1.5	0.405465	1.875	0.628609	0.7	-0.356675	1.21212	0.192372	2.46465	0.902048	1.26733	0.23691
274266	24	39	1	1	1	1	18.4033	0	0	0	0	0	0	0	0	0	0	1	0	0	0	1.38	1.19	0.9	1.07	0.65	0.95	12	12	12	17	17	17	1.40816	0.342286	1.23958	0.214775	0.9	-0.105361	1.08081	0.077709	0.677083	-0.389961	0.931373	-0.0710959
272349	23	40	1	1	0	1	22.3133	0	0	0	0	0	0	0	0	0	0	0	0	0	0	0.51	0.43	0.7	0.85	0.4	0.87	12	12	12	16	16	16	0.520408	-0.653142	0.447917	-0.803148	0.7	-0.356675	0.858586	-0.152469	0.40404	-0.90624	0.861386	-0.149212
274280	26	39	1	1	1	1	16.2031	0	0	0	0	0	0	0	0	0	0	0	0	0	0	0.58	0.9	0.9	0.82	0.88	1.26	12	12	12	16	16	16	0.591837	-0.524524	0.9375	-0.0645385	0.9	-0.105361	0.828283	-0.188401	0.888889	-0.117783	1.24752	0.221161
249619	33	39	1	1	1	1	20.5049	0	0	1	1	0	0	0	0	0	0	1	0	0	0	1.43	1.02	1.3	1.05	1.71	0.53	13	13	13	17	17	17	1.45918	0.377877	1.0625	0.0606246	1.3	0.262364	1.06061	0.0588405	1.78125	0.577315	0.519608	-0.654681
273125	26	39	1	1	1	0	21.6311	0	0	0	0	0	0	0	0	0	0	0	0	0	0	0.54	2.57	0.7	2.41	6.6	1.51	12	12	12	16	16	16	0.55102	-0.595983	2.67708	0.984728	0.7	-0.356675	2.43434	0.889677	6.66667	1.89712	1.49505	0.402159
124025	31	38	1	1	0	1	29.2969	0	1	1	1	0	0	0	0	1	0	0	0	0	0	0.78	1.61	0.9	1.01	1.14	1.17	13	13	13	17	17	17	0.795918	-0.228259	1.67708	0.517056	0.9	-0.105361	1.0202	0.0200007	1.1875	0.17185	1.14706	0.137201
273204	26	38	0	1	0	1	17.2248	0	0	1	1	0	0	0	0	0	0	0	0	0	0	0.72	0.76	0.9	0.82	0.56	1.1	12	12	12	16	16	16	0.734694	-0.308301	0.791667	-0.233615	0.9	-0.105361	0.828283	-0.188401	0.565657	-0.569768	1.08911	0.0853598
273210	31	40	0	1	1	0	20.0777	0	0	0	0	0	0	0	0	0	0	0	0	0	0	2.44	4.63	0.9	0.85	9.53	0.96	13	13	13	17	17	17	2.4898	0.912201	4.82292	1.57338	0.9	-0.105361	0.858586	-0.152469	9.92708	2.29527	0.941176	-0.0606246
246362	27	38	0	1	1	1	19.736	0	1	0	0	0	0	0	0	0	0	0	0	0	0	1	0.95	0.8	0.86	1.05	0.97	12	12	12	17	17	17	1.02041	0.0202027	0.989583	-0.0104713	0.8	-0.223144	0.868687	-0.140773	1.09375	0.0896122	0.95098	-0.0502618
274331	19	40	1	0	0	0	20.2395	0	0	0	1	0	0	0	0	0	0	1	0	1	0	1.98	1.27	1	1.24	1.15	0.72	13	13	13	17	17	17	2.02041	0.7033	1.32292	0.279839	1	0	1.25253	0.225162	1.19792	0.180584	0.705882	-0.348307
273274	26	39	1	1	1	0	19.8141	0	0	0	0	0	0	0	0	0	0	0	0	0	0	0.89	3.45	0.8	0.9	3.8	1.31	12	12	12	17	17	17	0.908163	-0.0963311	3.59375	1.2792	0.8	-0.223144	0.909091	-0.0953102	3.95833	1.37582	1.28431	0.250225
271363	23	40	0	1	1	1	18.2183	0	0	0	0	0	0	0	0	0	0	0	0	0	0	0.79	0.48	0.8	1.64	0.5	1.17	12	12	12	16	16	16	0.806122	-0.21552	0.5	-0.693147	0.8	-0.223144	1.65657	0.504747	0.505051	-0.683097	1.15842	0.147053
274387	27	37	1	1	1	1	22.5827	0	0	0	0	0	0	0	0	0	0	0	0	0	0	1.02	0.8	1.1	1.49	0.92	1.56	12	12	12	16	16	16	1.04082	0.0400053	0.833333	-0.182322	1.1	0.0953102	1.50505	0.408826	0.929293	-0.0733313	1.54455	0.434735
274397	23	39	0	1	0	0	19.5859	0	0	1	1	0	0	0	0	0	0	0	0	0	0	0.41	1.37	0.9	0.62	1.56	1.36	11	11	11	14	14	14	0.431579	-0.840305	1.39796	0.335013	0.9	-0.105361	0.613861	-0.487986	1.4717	0.386417	1.43158	0.358778
274400	30	31	1	1	0	1	22.6667	0	1	0	1	1	1	1	0	0	0	0	0	0	0	0.38	1.42	1	0.98	0.93	1.05	12	12	12	17	17	17	0.387755	-0.947381	1.47917	0.391479	1	0	0.989899	-0.0101524	0.96875	-0.0317487	1.02941	0.0289875
274582	25	38	0	1	0	0	23.3333	0	0	1	1	0	0	0	0	0	0	0	0	0	0	0.92	0.69	1.6	0.83	1.11	0.97	12	12	12	18	18	18	0.938776	-0.0631789	0.71875	-0.330242	1.6	0.470004	0.838384	-0.176279	1.18085	0.166235	0.92381	-0.0792494
274609	35	41	0	1	1	1	18.7328	0	1	0	0	0	0	0	0	0	0	0	0	0	0	1.89	1.81	1	1.4	1.77	1.25	11	11	11	16	16	16	1.98947	0.68787	1.84694	0.61353	1	0	1.41414	0.346523	1.78788	0.58103	1.23762	0.213193
274615	27	39	0	1	1	1	21.6713	0	0	0	0	0	0	0	0	0	0	1	0	0	0	0.69	0.54	0.7	0.72	0.59	1.46	12	12	12	16	16	16	0.704082	-0.350861	0.5625	-0.575364	0.7	-0.356675	0.727273	-0.318454	0.59596	-0.517582	1.44554	0.368486
199874	28	39	0	1	1	1	21.3333	0	0	1	1	0	0	0	0	0	0	0	0	0	0	0.91	0.69	0.8	1.25	0.68	1.28	13	13	13	17	17	17	0.928571	-0.074108	0.71875	-0.330242	0.8	-0.223144	1.26263	0.233194	0.708333	-0.34484	1.2549	0.227057
236382	24	37	1	1	1	1	20.7031	0	0	0	0	0	0	0	1	0	0	1	0	0	0	1.07	1.6	1.4	1.43	1.34	1.72	12	12	12	16	16	16	1.09184	0.0878614	1.66667	0.510826	1.4	0.336472	1.44444	0.367725	1.35354	0.30272	1.70297	0.532374
274679	28	40	1	1	1	1	19.9792	0	0	0	1	0	0	0	0	0	0	1	0	1	0	0.28	0.32	0.8	0.95	0.34	0.75	12	12	12	16	16	16	0.285714	-1.25276	0.333333	-1.09861	0.8	-0.223144	0.959596	-0.041243	0.343434	-1.06876	0.742574	-0.297632
271003	29	40	0	1	1	0	16.6924	0	0	1	0	0	0	0	0	0	0	0	0	0	0	0.45	0.78	1.2	1.18	0.63	0.92	13	13	13	18	18	18	0.459184	-0.778305	0.8125	-0.207639	1.2	0.182322	1.19192	0.175565	0.670213	-0.40016	0.87619	-0.132172
273541	30	39	1	1	0	0	20.8889	0	1	1	1	0	0	0	0	1	0	0	0	0	0	0.41	0.82	0.8	0.79	1.04	0.79	12	12	12	17	17	17	0.418367	-0.871395	0.854167	-0.157629	0.8	-0.223144	0.79798	-0.225672	1.08333	0.0800427	0.77451	-0.255525
161073	32	39	1	1	1	0	22.2656	0	1	0	0	0	0	0	0	0	0	0	0	0	0	1.41	0.97	1.1	1.03	1.31	1.54	12	12	12	16	16	16	1.43878	0.363792	1.01042	0.0103628	1.1	0.0953102	1.0404	0.0396091	1.32323	0.280077	1.52475	0.421832
273559	32	39	1	1	1	0	21.0828	0	1	0	0	0	0	0	0	1	0	1	0	0	0	0.79	1.19	0.9	1.32	1.55	0.85	12	12	12	17	17	17	0.806122	-0.21552	1.23958	0.214775	0.9	-0.105361	1.33333	0.287682	1.61458	0.479077	0.833333	-0.182322
275026	29	39	0	1	1	1	23.8281	0	0	1	0	0	0	0	0	0	0	0	0	0	0	1.47	1.1	0.9	0.89	0.66	1.19	12	12	12	16	16	16	1.5	0.405465	1.14583	0.136132	0.9	-0.105361	0.89899	-0.106483	0.666667	-0.405465	1.17822	0.164003
275027	18	40	1	1	0	0	17.9982	0	0	0	1	0	0	0	0	0	0	0	0	0	0	0.49	0.57	0.9	1.41	0.67	1.19	13	13	13	17	17	17	0.5	-0.693147	0.59375	-0.521297	0.9	-0.105361	1.42424	0.35364	0.697917	-0.359656	1.16667	0.154151
160028	31	41	1	1	1	1	20.4294	0	1	1	0	0	0	0	0	0	0	0	0	0	0	1.6	4.46	1.4	1.15	2.21	1.02	13	13	13	19	19	19	1.63265	0.490206	4.64583	1.53597	1.4	0.336472	1.16162	0.149812	2.2551	0.813195	0.980769	-0.0194181
275043	34	40	1	1	1	1	20.7008	0	0	0	0	0	0	0	1	0	0	0	0	0	0	0.87	0.6	0.9	1.96	0.62	0.81	13	13	13	16	16	16	0.887755	-0.119059	0.625	-0.470004	0.9	-0.105361	1.9798	0.682995	0.626263	-0.467985	0.80198	-0.220671
273010	33	38	1	1	1	1	26.6384	0	1	0	0	0	0	0	0	0	0	0	0	0	0	0.79	0.9	0.5	0.76	0.91	0.68	12	12	12	17	17	17	0.806122	-0.21552	0.9375	-0.0645385	0.5	-0.693147	0.767677	-0.264387	0.947917	-0.0534887	0.666667	-0.405465
263233	23	39	0	1	1	1	18.2868	0	0	0	1	0	0	0	0	0	0	0	0	0	0	1.34	1.44	0.7	1.18	1.45	1.05	11	11	11	16	16	16	1.41053	0.343963	1.46939	0.384846	0.7	-0.356675	1.19192	0.175565	1.46465	0.381614	1.0396	0.0388398
274826	19	35	1	1	1	0	20.0208	0	0	0	0	1	0	1	0	0	0	0	0	0	0	1.29	0.9	0.8	0.84	0.55	1.18	12	12	12	18	18	18	1.31633	0.274845	0.9375	-0.0645385	0.8	-0.223144	0.848485	-0.164303	0.585106	-0.535962	1.12381	0.116724
275007	33	40	1	1	1	0	25.3906	0	0	0	0	0	0	0	0	0	0	0	0	0	0	1.21	0.93	1	1.05	1.54	0.99	13	13	13	17	17	17	1.23469	0.210823	0.96875	-0.0317487	1	0	1.06061	0.0588405	1.60417	0.472604	0.970588	-0.029853
248700	23	40	1	1	0	0	21.875	0	1	1	1	0	0	0	0	0	0	1	0	0	0	1.29	1.56	1.3	0.96	2.5	0.66	12	12	12	16	16	16	1.31633	0.274845	1.625	0.485508	1.3	0.262364	0.969697	-0.0307717	2.52525	0.926341	0.653465	-0.425466
275065	31	39	0	1	1	0	29.1363	0	1	1	0	0	0	0	0	1	0	0	0	0	0	1.12	1.43	1.1	0.76	1.04	1.02	13	13	13	17	17	17	1.14286	0.133531	1.48958	0.398496	1.1	0.0953102	0.767677	-0.264387	1.08333	0.0800427	1	0
248861	25	40	0	1	1	1	22.0517	0	1	1	0	0	0	0	0	0	0	1	0	0	0	0.62	2.07	0.8	0.57	2.12	1.22	12	12	12	18	18	18	0.632653	-0.457833	2.15625	0.768371	0.8	-0.223144	0.575758	-0.552069	2.25532	0.813291	1.1619	0.150061
275148	26	39	1	1	0	1	20.889	0	0	0	1	0	0	0	0	0	0	1	0	0	0	1.41	0.76	1	1.09	0.75	1.18	13	13	13	17	17	17	1.43878	0.363792	0.791667	-0.233615	1	0	1.10101	0.096228	0.78125	-0.24686	1.15686	0.145712
275168	26	39	0	1	0	1	18.7888	0	0	1	1	0	0	0	0	0	0	0	0	0	0	0.88	0.99	1.3	1.16	0.92	0.82	12	12	12	16	16	16	0.897959	-0.107631	1.03125	0.0307717	1.3	0.262364	1.17172	0.15847	0.929293	-0.0733313	0.811881	-0.208401
260663	28	40	0	1	1	1	18.0802	0	0	0	1	0	0	0	0	0	0	1	0	0	0	1.79	1.4	1.1	1.13	0.86	0.87	11	11	11	17	17	17	1.88421	0.633509	1.42857	0.356675	1.1	0.0953102	1.14141	0.132268	0.895833	-0.110001	0.852941	-0.159065
273452	29	40	1	1	0	1	21.4844	0	0	0	0	0	0	0	1	0	0	0	0	0	0	1.39	1.55	0.9	1.46	1.53	1.82	12	12	12	16	16	16	1.41837	0.349506	1.61458	0.479077	0.9	-0.105361	1.47475	0.388487	1.54545	0.435318	1.80198	0.588886
273467	21	36	1	1	0	0	20.8949	0	0	0	1	1	0	1	0	0	0	0	0	0	0	0.4	0.8	0.7	0.89	1.62	0.63	12	12	12	16	16	16	0.408163	-0.896088	0.833333	-0.182322	0.7	-0.356675	0.89899	-0.106483	1.63636	0.492476	0.623762	-0.471986
274525	25	38	1	1	1	0	20.9572	0	0	1	1	0	0	0	0	0	0	0	0	0	0	0.73	0.95	1.3	1.08	0.81	1.2	12	12	12	16	16	16	0.744898	-0.294508	0.989583	-0.0104713	1.3	0.262364	1.09091	0.0870114	0.818182	-0.200671	1.18812	0.172371
274540	38	39	1	1	0	1	22.2063	0	1	0	0	0	0	0	0	1	0	0	0	0	0	0.78	2.43	1	0.54	0.87	1.14	13	13	13	17	17	17	0.795918	-0.228259	2.53125	0.928713	1	0	0.545455	-0.606136	0.90625	-0.0984401	1.11765	0.111226
274554	26	39	1	1	1	1	18.5901	0	0	1	0	0	0	0	0	0	0	0	0	0	0	1.54	4.13	0.8	1.28	4.98	0.99	12	12	12	16	16	16	1.57143	0.451985	4.30208	1.4591	0.8	-0.223144	1.29293	0.25691	5.0303	1.61548	0.980198	-0.0200007
202765	33	40	0	1	1	1	20.061	0	1	1	0	0	0	0	0	0	0	0	0	0	0	1.04	0.76	1.1	0.86	0.65	1.4	13	13	13	17	17	17	1.06122	0.0594234	0.791667	-0.233615	1.1	0.0953102	0.868687	-0.140773	0.677083	-0.389961	1.37255	0.31667
274591	29	40	0	1	1	1	19.4674	0	0	0	0	0	0	0	0	0	0	0	0	0	0	0.47	0.49	0.7	0.89	0.82	1.31	12	12	12	17	17	17	0.479592	-0.73482	0.510417	-0.672528	0.7	-0.356675	0.89899	-0.106483	0.854167	-0.157629	1.28431	0.250225
274637	35	38	1	1	1	1	21.4844	0	1	1	1	0	0	0	0	0	0	1	0	0	0	0.36	0.72	1	0.59	0.36	0.93	12	12	12	16	16	16	0.367347	-1.00145	0.75	-0.287682	1	0	0.59596	-0.517582	0.363636	-1.0116	0.920792	-0.082521
169989	30	39	0	1	1	1	22.6409	0	1	1	0	0	0	0	0	1	0	1	0	0	0	0.76	1.47	0.7	0.91	1.85	1.01	13	13	13	17	17	17	0.77551	-0.254234	1.53125	0.426084	0.7	-0.356675	0.919192	-0.0842603	1.92708	0.656008	0.990196	-0.0098523
274811	32	40	1	1	0	1	18.1641	0	0	0	0	0	0	0	0	0	0	0	0	0	0	1.47	0.9	1	0.85	0.64	1.57	12	12	12	16	16	16	1.5	0.405465	0.9375	-0.0645385	1	0	0.858586	-0.152469	0.646465	-0.436237	1.55446	0.441125
92888	31	37	1	1	1	0	21.3382	0	1	0	0	0	0	0	0	1	0	0	0	0	0	1.11	1.58	0.9	0.83	1.01	0.67	12	12	12	16	16	16	1.13265	0.124563	1.64583	0.498247	0.9	-0.105361	0.838384	-0.176279	1.0202	0.0200007	0.663366	-0.410428
273564	24	33	0	1	1	1	18.3064	0	0	1	1	1	1	1	0	0	0	0	0	0	0	0.51	0.9	0.5	1.35	1.18	0.95	13	13	13	17	17	17	0.520408	-0.653142	0.9375	-0.0645385	0.5	-0.693147	1.36364	0.310155	1.22917	0.206336	0.931373	-0.0710959
273625	28	41	0	1	1	0	22.8624	0	0	0	0	0	0	0	0	0	0	0	0	0	0	1.22	2.98	0.8	0.76	3.26	0.83	12	12	12	16	16	16	1.2449	0.219054	3.10417	1.13275	0.8	-0.223144	0.767677	-0.264387	3.29293	1.19178	0.821782	-0.19628
284360	29	39	1	1	1	1	20.3223	0	0	1	1	0	0	0	0	0	0	0	0	0	0	1.35	4.53	1.1	0.78	4.42	0.97	12	12	12	17	17	17	1.37755	0.320307	4.71875	1.55154	1.1	0.0953102	0.787879	-0.238411	4.60417	1.52696	0.95098	-0.0502618
219307	27	41	0	1	1	1	19.2164	0	1	1	1	0	0	0	0	0	0	0	0	0	0	1.74	0.58	0.8	0.92	0.57	1.06	12	12	12	17	17	17	1.77551	0.574088	0.604167	-0.503905	0.8	-0.223144	0.929293	-0.0733313	0.59375	-0.521297	1.03922	0.0384663
272437	32	39	1	1	1	1	22.9568	0	0	0	1	0	0	0	0	0	0	0	0	0	0	1.12	0.57	1	1.02	1.07	1.13	12	12	12	17	17	17	1.14286	0.133531	0.59375	-0.521297	1	0	1.0303	0.029853	1.11458	0.108481	1.10784	0.102415
283306	29	38	0	1	1	1	23.6799	0	0	0	1	0	0	0	0	0	0	1	0	0	0	1.33	1.41	0.9	0.9	1.09	0.99	12	12	12	16	16	16	1.35714	0.305382	1.46875	0.384412	0.9	-0.105361	0.909091	-0.0953102	1.10101	0.096228	0.980198	-0.0200007
284477	28	39	1	1	1	0	19.4674	0	1	0	0	0	0	0	0	0	0	0	0	0	0	1.31	2.11	1	0.74	0.75	1.31	13	13	13	19	19	19	1.33673	0.29023	2.19792	0.78751	1	0	0.747475	-0.291055	0.765306	-0.267479	1.25962	0.230806
282073	28	39	0	1	0	1	21.9098	0	1	1	1	0	0	0	0	1	0	0	0	0	0	2.37	0.72	0.7	0.79	0.62	1.38	12	12	12	17	17	17	2.41837	0.883093	0.75	-0.287682	0.7	-0.356675	0.79798	-0.225672	0.645833	-0.437214	1.35294	0.302281
284527	24	40	1	1	0	0	21.9532	0	0	1	1	0	0	0	0	0	0	0	0	0	0	1.63	0.49	0.7	0.83	0.39	0.89	12	12	12	19	19	19	1.66327	0.508783	0.510417	-0.672528	0.7	-0.356675	0.838384	-0.176279	0.397959	-0.921406	0.855769	-0.155755
223335	30	38	1	1	1	1	27.3909	0	1	0	0	0	0	0	0	0	0	0	0	0	0	0.72	0.45	1.2	0.94	0.41	1.41	12	12	12	17	17	17	0.734694	-0.308301	0.46875	-0.757686	1.2	0.182322	0.949495	-0.0518251	0.427083	-0.850776	1.38235	0.323787
282859	27	41	1	1	0	1	23.4375	0	1	1	1	0	0	0	0	0	0	0	0	0	0	1.11	0.72	1	0.82	0.66	0.89	13	13	13	17	17	17	1.13265	0.124563	0.75	-0.287682	1	0	0.828283	-0.188401	0.6875	-0.374693	0.872549	-0.136336
282927	29	37	1	1	1	1	23.7356	0	0	0	0	0	0	0	0	0	0	0	0	0	0	1.24	0.8	0.8	0.99	0.58	1.16	12	12	12	16	16	16	1.26531	0.235314	0.833333	-0.182322	0.8	-0.223144	1	0	0.585859	-0.534677	1.14851	0.13847
284740	27	40	0	1	1	1	22.4221	0	0	0	0	0	0	0	0	0	0	0	0	0	0	1.69	3.47	0.7	0.75	3.26	0.87	13	13	13	16	16	16	1.72449	0.544931	3.61458	1.28498	0.7	-0.356675	0.757576	-0.277632	3.29293	1.19178	0.861386	-0.149212
222902	33	40	1	1	1	1	19.6072	0	1	1	0	0	0	0	0	0	0	0	0	0	0	1.11	0.28	1	1.09	0.52	0.89	12	12	12	17	17	17	1.13265	0.124563	0.291667	-1.23214	1	0	1.10101	0.096228	0.541667	-0.613104	0.872549	-0.136336
284752	33	39	1	1	1	0	19.736	0	1	0	0	0	0	0	0	0	0	0	0	1	0	0.91	1.15	0.9	1.24	1.91	1.2	12	12	12	17	17	17	0.928571	-0.074108	1.19792	0.180584	0.9	-0.105361	1.25253	0.225162	1.98958	0.687925	1.17647	0.162519
278209	28	38	0	1	1	1	24.1415	0	0	0	0	0	0	0	0	0	0	1	0	0	0	1.39	0.72	1	0.83	0.53	0.77	13	13	13	17	17	17	1.41837	0.349506	0.75	-0.287682	1	0	0.838384	-0.176279	0.552083	-0.594056	0.754902	-0.281167
284791	31	39	1	1	1	0	21.4844	0	1	0	0	0	0	0	0	0	0	0	0	0	0	1.13	0.47	1	0.65	0.38	1.19	12	12	12	16	16	16	1.15306	0.14242	0.489583	-0.714201	1	0	0.656566	-0.420733	0.383838	-0.957534	1.17822	0.164003
236337	30	40	0	1	0	1	23.4952	0	1	0	1	0	0	0	0	0	0	0	0	0	0	1.28	0.8	1.4	0.79	0.79	1.21	13	13	13	16	16	16	1.30612	0.267063	0.833333	-0.182322	1.4	0.336472	0.79798	-0.225672	0.79798	-0.225672	1.19802	0.18067
277873	25	40	0	1	0	0	19.5312	0	0	0	0	0	0	0	0	0	0	1	0	0	0	0.65	1.03	0.8	0.87	1.31	0.76	13	13	13	17	17	17	0.663265	-0.41058	1.07292	0.0703808	0.8	-0.223144	0.878788	-0.129212	1.36458	0.310849	0.745098	-0.294239
236668	28	40	1	1	0	1	23.4236	0	1	0	1	0	0	0	0	0	0	0	0	0	0	0.28	1.05	0.8	1.08	1.54	1.43	12	12	12	16	16	16	0.285714	-1.25276	1.09375	0.0896122	0.8	-0.223144	1.09091	0.0870114	1.55556	0.441833	1.41584	0.347724
269971	28	39	1	1	1	1	17.2248	0	0	0	0	0	0	0	0	0	0	0	0	0	0	0.78	1	1.1	1.05	1.05	0.97	12	12	12	17	17	17	0.795918	-0.228259	1.04167	0.040822	1.1	0.0953102	1.06061	0.0588405	1.09375	0.0896122	0.95098	-0.0502618
176194	28	39	0	1	1	0	20.202	0	1	1	1	0	0	0	0	0	0	1	0	0	0	0.93	0.63	0.8	0.97	0.76	1.08	13	13	13	18	18	18	0.94898	-0.052368	0.65625	-0.421213	0.8	-0.223144	0.979798	-0.0204089	0.808511	-0.212561	1.02857	0.0281709
284084	27	38	1	1	1	1	18.8189	0	0	1	1	0	0	0	0	0	0	0	0	0	0	1.9	1.77	1.4	0.66	1.3	1.33	13	13	13	17	17	17	1.93878	0.662057	1.84375	0.611802	1.4	0.336472	0.666667	-0.405465	1.35417	0.303186	1.30392	0.265376
284086	28	40	1	1	1	0	22.2222	0	0	1	1	0	0	0	0	0	0	0	0	0	0	0.78	0.91	0.8	1.23	1.65	1.48	12	12	12	16	16	16	0.795918	-0.228259	0.947917	-0.0534887	0.8	-0.223144	1.24242	0.217065	1.66667	0.510826	1.46535	0.382092
238540	31	37	0	1	1	1	24.9135	0	1	1	0	0	0	0	0	0	0	0	0	0	0	0.87	0.78	1.3	0.78	1.29	1.21	12	12	12	17	17	17	0.887755	-0.119059	0.8125	-0.207639	1.3	0.262364	0.787879	-0.238411	1.34375	0.295464	1.18627	0.170818
88479	29	39	0	1	0	0	24.0346	0	1	1	0	0	0	0	0	0	0	0	0	0	0	0.61	1.48	0.7	0.8	1.07	0.82	11	11	11	16	16	16	0.642105	-0.443003	1.5102	0.412245	0.7	-0.356675	0.808081	-0.213093	1.08081	0.077709	0.811881	-0.208401
284101	27	37	0	1	0	1	19.563	0	1	0	1	0	0	0	0	1	0	1	0	0	0	1.64	1.92	1.2	1.02	1.58	1	12	12	12	17	17	17	1.67347	0.514899	2	0.693147	1.2	0.182322	1.0303	0.029853	1.64583	0.498247	0.980392	-0.0198026
123521	33	37	1	1	1	1	22.4273	0	1	0	0	0	0	0	0	1	0	0	0	0	0	0.63	0.46	1.3	0.97	0.77	1.12	11	11	11	16	16	16	0.663158	-0.410742	0.469388	-0.756326	1.3	0.262364	0.979798	-0.0204089	0.777778	-0.251314	1.10891	0.103378
283974	34	39	1	1	1	0	26.1719	0	1	0	1	0	0	0	0	1	0	0	0	0	0	1.58	2.95	1.2	0.74	3.09	0.8	14	14	14	18	18	18	1.50476	0.408635	3.17204	1.15438	1.2	0.182322	0.747475	-0.291055	3.28723	1.19005	0.761905	-0.271934
283326	27	40	1	1	1	1	18.4406	0	0	1	1	0	0	0	0	0	0	0	0	0	0	1.18	0.56	1.1	1.35	0.53	1.19	11	11	11	16	16	16	1.24211	0.216808	0.571429	-0.559616	1.1	0.0953102	1.36364	0.310155	0.535354	-0.624828	1.17822	0.164003
223499	22	39	0	1	0	1	16.4237	0	1	0	1	0	0	0	0	1	0	0	0	0	0	1.71	0.86	1	1.15	0.77	1.24	13	13	13	17	17	17	1.7449	0.556696	0.895833	-0.110001	1	0	1.16162	0.149812	0.802083	-0.220543	1.21569	0.195309
283376	17	37	1	1	0	0	21.2442	0	0	0	1	0	0	0	0	0	0	0	0	0	0	0.99	0.34	0.4	0.7	0.32	1.04	14	14	14	17	17	17	0.942857	-0.0588405	0.365591	-1.00624	0.4	-0.916291	0.707071	-0.346625	0.333333	-1.09861	1.01961	0.0194181
173257	25	39	1	1	1	1	17.2879	0	1	1	1	0	0	0	0	0	0	0	0	0	0	0.42	1.11	1.1	1.1	1.17	1.27	13	13	13	17	17	17	0.428571	-0.847298	1.15625	0.145182	1.1	0.0953102	1.11111	0.105361	1.21875	0.197826	1.2451	0.219214
286814	28	41	1	1	1	1	19.0673	0	0	0	0	0	0	0	0	0	0	0	0	0	0	1.95	0.73	1.4	0.84	0.8	1.52	13	13	13	16	16	16	1.9898	0.688032	0.760417	-0.273889	1.4	0.336472	0.848485	-0.164303	0.808081	-0.213093	1.50495	0.40876
286864	30	40	1	1	1	1	18.0802	0	0	0	0	0	0	0	0	0	0	0	0	0	0	1.14	0.98	1.5	0.84	0.64	1.34	13	13	13	16	16	16	1.16327	0.151231	1.02083	0.0206193	1.5	0.405465	0.848485	-0.164303	0.646465	-0.436237	1.32673	0.282719
286894	31	40	0	1	0	0	22.6562	0	1	1	1	0	0	0	0	0	0	0	0	0	0	0.53	0.25	1.3	1.07	0.28	1.77	14	14	14	18	18	18	0.504762	-0.683668	0.268817	-1.31372	1.3	0.262364	1.08081	0.077709	0.297872	-1.21109	1.68571	0.522189
146078	31	37	1	1	0	1	20.7031	0	1	0	0	0	0	0	0	0	0	0	0	0	0	0.76	1.5	1.1	1.64	1.33	1.08	12	12	12	16	16	16	0.77551	-0.254234	1.5625	0.446287	1.1	0.0953102	1.65657	0.504747	1.34343	0.295229	1.06931	0.0670107
171219	25	39	1	1	1	0	23.771	0	1	1	0	0	0	0	0	0	0	0	0	0	0	1.14	0.53	1	0.81	0.39	1.56	12	12	12	16	16	16	1.16327	0.151231	0.552083	-0.594056	1	0	0.818182	-0.200671	0.393939	-0.931558	1.54455	0.434735
253832	23	38	1	1	0	0	17.0392	0	1	1	1	0	0	0	0	0	0	0	0	0	0	0.27	0.74	0.7	0.68	0.71	1.21	12	12	12	20	20	20	0.27551	-1.28913	0.770833	-0.260283	0.7	-0.356675	0.673267	-0.395613	0.771739	-0.259109	1.13084	0.122962
285245	25	39	1	1	1	1	24.0346	0	0	1	1	0	0	0	0	0	0	0	0	0	0	0.87	2.19	1.2	1.26	2.52	1.43	12	12	12	16	16	16	0.887755	-0.119059	2.28125	0.824724	1.2	0.182322	1.27273	0.241162	2.54545	0.934309	1.41584	0.347724
285253	34	39	0	1	0	1	19.8178	0	1	0	0	0	0	0	0	1	0	0	0	0	0	1	2.07	1.1	0.54	2.04	0.96	12	12	12	16	16	16	1.02041	0.0202027	2.15625	0.768371	1.1	0.0953102	0.545455	-0.606136	2.06061	0.723	0.950495	-0.0507723
284144	33	39	0	1	1	1	20.5457	0	1	0	0	0	0	0	0	0	0	0	0	0	0	1.93	0.83	1.1	0.58	0.56	0.86	12	12	12	17	17	17	1.96939	0.677723	0.864583	-0.145508	1.1	0.0953102	0.585859	-0.534677	0.583333	-0.538997	0.843137	-0.170626
284183	21	41	1	1	0	1	26.8386	0	0	0	0	0	0	0	0	0	0	0	0	0	0	1.39	1.09	1.3	0.92	1.53	0.96	13	13	13	20	20	20	1.41837	0.349506	1.13542	0.127	1.3	0.262364	0.910891	-0.0933319	1.66304	0.508649	0.897196	-0.108481
282373	26	40	0	1	1	0	20.2511	0	0	0	0	0	0	0	0	0	0	0	0	0	0	0.93	2.17	0.8	0.76	1.7	1.27	12	12	12	15	15	15	0.94898	-0.052368	2.26042	0.815549	0.8	-0.223144	0.76	-0.274437	1.63462	0.491408	1.29592	0.25922
282495	35	38	1	1	0	0	27.9191	0	1	1	1	0	0	0	0	1	0	1	0	0	0	1.94	0.68	1	0.82	0.6	1.62	13	13	13	17	17	17	1.97959	0.682891	0.708333	-0.34484	1	0	0.828283	-0.188401	0.625	-0.470004	1.58824	0.462624
271233	33	39	1	1	1	0	18.591	0	1	0	0	0	0	0	0	1	0	0	0	0	0	0.79	1.03	0.8	1.04	1	1.14	13	13	13	19	19	19	0.806122	-0.21552	1.07292	0.0703808	0.8	-0.223144	1.05051	0.049271	1.02041	0.0202027	1.09615	0.0918075
282545	24	34	1	1	1	1	22.6556	0	0	0	0	1	0	1	0	0	0	0	0	0	0	0.6	1.65	0.6	1.29	0.87	1.67	12	12	12	17	17	17	0.612245	-0.490623	1.71875	0.541597	0.6	-0.510826	1.30303	0.264693	0.90625	-0.0984401	1.63725	0.493021
271431	33	39	0	0	1	0	19.9293	0	1	0	1	0	0	0	0	1	0	0	0	0	0	0.81	0.37	1.1	0.41	0.33	1.21	12	12	12	17	17	17	0.826531	-0.190518	0.385417	-0.95343	1.1	0.0953102	0.414141	-0.881548	0.34375	-1.06784	1.18627	0.170818
203963	25	40	0	1	1	0	19.7239	0	1	1	1	0	0	0	0	0	0	1	0	0	0	1.12	1.41	1.5	1.08	0.95	1.1	13	13	13	17	17	17	1.14286	0.133531	1.46875	0.384412	1.5	0.405465	1.09091	0.0870114	0.989583	-0.0104713	1.07843	0.0755076
284005	32	39	0	1	1	1	19.9219	0	1	0	0	0	0	0	0	0	0	1	0	0	0	1.05	1.03	2	1	0.62	0.98	11	11	11	16	16	16	1.10526	0.100083	1.05102	0.0497615	2	0.693147	1.0101	0.0100503	0.626263	-0.467985	0.970297	-0.030153
282221	29	39	1	1	1	1	29.5626	0	1	0	0	0	0	0	0	0	0	0	0	0	0	0.53	0.52	1.1	1.19	0.67	1.25	12	12	12	17	17	17	0.540816	-0.614676	0.541667	-0.613104	1.1	0.0953102	1.20202	0.184004	0.697917	-0.359656	1.22549	0.203341
283481	27	41	0	1	0	1	19.1111	0	0	0	0	0	0	0	0	0	0	0	0	0	0	1.59	0.86	1.2	0.74	0.97	1.53	14	14	14	18	18	18	1.51429	0.414944	0.924731	-0.0782522	1.2	0.182322	0.747475	-0.291055	1.03191	0.0314162	1.45714	0.376478
245677	28	38	1	1	1	1	20.9644	0	1	0	0	0	0	0	0	0	0	0	0	0	0	1.36	0.65	1.2	0.81	0.59	1.19	12	12	12	16	16	16	1.38776	0.327687	0.677083	-0.389961	1.2	0.182322	0.818182	-0.200671	0.59596	-0.517582	1.17822	0.164003
276428	29	38	0	1	1	1	20.5457	0	0	0	0	0	0	0	0	0	0	1	0	0	0	0.66	0.54	1.1	0.54	0.72	1.28	12	12	12	16	16	16	0.673469	-0.395313	0.5625	-0.575364	1.1	0.0953102	0.545455	-0.606136	0.727273	-0.318454	1.26733	0.23691
284828	26	39	1	1	1	0	24.7221	0	1	0	0	0	0	0	0	1	0	1	0	0	0	0.55	0.7	0.9	1.5	0.68	1.55	12	12	12	17	17	17	0.561224	-0.577634	0.729167	-0.315853	0.9	-0.105361	1.51515	0.415515	0.708333	-0.34484	1.51961	0.418452
283003	31	40	0	1	0	0	23.7253	1	1	0	1	0	0	0	0	0	0	0	0	0	0	1.29	1.31	1.1	1.19	0.87	1.62	12	12	12	16	16	16	1.31633	0.274845	1.36458	0.310849	1.1	0.0953102	1.20202	0.184004	0.878788	-0.129212	1.60396	0.472476
283037	23	39	1	1	0	1	16.0195	0	0	0	0	0	0	0	0	0	0	0	0	0	0	0.99	0.53	0.8	0.98	0.55	1.16	12	12	12	17	17	17	1.0102	0.0101524	0.552083	-0.594056	0.8	-0.223144	0.989899	-0.0101524	0.572917	-0.557015	1.13725	0.128617
286920	31	41	0	1	0	1	19.4734	0	0	0	1	0	0	0	0	0	0	0	0	0	0	1.45	0.96	0.9	0.98	1.12	0.94	13	13	13	16	16	16	1.47959	0.391766	1	0	0.9	-0.105361	0.989899	-0.0101524	1.13131	0.123379	0.930693	-0.0718257
244364	29	40	1	1	0	1	22.137	0	1	0	1	0	0	0	0	0	0	1	0	0	0	0.81	0.29	0.9	1.12	0.26	0.97	12	12	12	16	16	16	0.826531	-0.190518	0.302083	-1.19705	0.9	-0.105361	1.13131	0.123379	0.262626	-1.33702	0.960396	-0.0404095
282594	33	39	1	1	1	1	20.5761	0	1	0	0	0	0	0	0	1	0	0	0	0	0	0.89	0.65	0.8	0.98	0.49	1.1	12	12	12	17	17	17	0.908163	-0.0963311	0.677083	-0.389961	0.8	-0.223144	0.989899	-0.0101524	0.510417	-0.672528	1.07843	0.0755076
282615	23	38	1	1	0	0	17.9649	0	0	0	0	0	0	0	0	0	0	0	0	0	0	1.4	2.71	1.1	2.15	3.4	1.16	13	13	13	17	17	17	1.42857	0.356675	2.82292	1.03777	1.1	0.0953102	2.17172	0.775518	3.54167	1.2646	1.13725	0.128617
282617	28	39	1	1	1	1	21.884	0	0	0	0	0	0	0	0	0	0	0	0	0	0	1.29	3.35	1.2	0.79	3.09	1.28	14	14	14	19	19	19	1.22857	0.205852	3.60215	1.28153	1.2	0.182322	0.79798	-0.225672	3.15306	1.14837	1.23077	0.207639
285837	35	38	0	0	1	1	21.271	0	1	0	0	0	0	0	0	1	0	0	0	0	0	1.69	1.44	1.1	1.06	1.9	1.06	12	12	12	16	16	16	1.72449	0.544931	1.5	0.405465	1.1	0.0953102	1.07071	0.0683192	1.91919	0.651904	1.0495	0.0483186
256100	30	34	0	1	1	1	18.8189	0	1	0	0	1	0	1	0	1	0	0	0	1	1	1.89	2.11	1.1	0.79	1.72	0.94	12	12	12	16	16	16	1.92857	0.65678	2.19792	0.78751	1.1	0.0953102	0.79798	-0.225672	1.73737	0.552375	0.930693	-0.0718257
68619	36	39	0	1	1	0	20.4467	0	1	0	0	0	0	0	0	0	0	1	0	0	0	1.5	2.41	0.9	0.57	2.58	1	12	12	12	16	16	16	1.53061	0.425668	2.51042	0.920449	0.9	-0.105361	0.575758	-0.552069	2.60606	0.95784	0.990099	-0.00995033
282241	31	37	0	1	1	1	17.2739	0	0	0	0	0	0	0	0	0	0	0	0	0	0	1.59	2.59	0.9	1.06	1.52	1.1	12	12	12	16	16	16	1.62245	0.483937	2.69792	0.99248	0.9	-0.105361	1.07071	0.0683192	1.53535	0.428761	1.08911	0.0853598
282264	23	38	1	1	0	1	25.2994	0	0	0	0	0	0	0	0	0	0	1	0	0	0	1.09	1.28	1.4	1.5	0.97	1.38	12	12	12	16	16	16	1.11224	0.10638	1.33333	0.287682	1.4	0.336472	1.51515	0.415515	0.979798	-0.0204089	1.36634	0.312133
281315	33	40	0	1	1	0	19.8141	0	0	0	0	0	0	0	1	0	0	0	0	0	0	1.01	0.77	1	1.26	0.59	1.29	12	12	12	16	16	16	1.03061	0.030153	0.802083	-0.220543	1	0	1.27273	0.241162	0.59596	-0.517582	1.27723	0.244692
199196	29	39	1	1	1	1	23.7253	0	1	0	0	0	0	0	0	0	0	0	0	0	0	1.44	0.65	0.7	1.32	0.73	0.73	12	12	12	16	16	16	1.46939	0.384846	0.677083	-0.389961	0.7	-0.356675	1.33333	0.287682	0.737374	-0.30466	0.722772	-0.324661
282308	28	39	1	1	1	1	19.5717	0	0	0	1	0	0	0	0	0	0	0	0	0	0	0.61	0.65	1	0.8	0.7	0.85	12	12	12	16	16	16	0.622449	-0.474094	0.677083	-0.389961	1	0	0.808081	-0.213093	0.707071	-0.346625	0.841584	-0.172469
284873	28	39	0	1	1	1	25.204	0	0	0	0	0	0	0	0	0	0	1	0	0	0	1.84	2.51	1	0.77	3.82	1.15	12	12	12	16	16	16	1.87755	0.629968	2.61458	0.961105	1	0	0.777778	-0.251314	3.85859	1.3503	1.13861	0.129812
282891	26	39	1	1	0	1	21.2183	0	0	1	1	0	0	0	0	0	0	0	0	0	0	0.39	1.17	1.3	1.41	1.94	1.38	13	13	13	17	17	17	0.397959	-0.921406	1.21875	0.197826	1.3	0.262364	1.42424	0.35364	2.02083	0.70351	1.35294	0.302281
282928	26	40	1	1	1	1	23.7954	0	0	0	0	0	0	0	0	0	0	0	0	0	0	0.69	0.82	1.6	0.91	1	1.11	12	12	12	16	16	16	0.704082	-0.350861	0.854167	-0.157629	1.6	0.470004	0.919192	-0.0842603	1.0101	0.0100503	1.09901	0.0944097
279233	29	39	1	1	1	1	18.662	0	0	1	0	0	0	0	0	0	0	0	0	0	0	0.95	3.43	0.7	1.47	4.19	1.24	13	13	13	17	17	17	0.969388	-0.0310906	3.57292	1.27338	0.7	-0.356675	1.48485	0.395313	4.36458	1.47352	1.21569	0.195309
282970	30	39	1	1	0	0	21.2412	0	1	1	1	0	0	0	0	0	0	1	0	0	0	0.39	0.51	0.7	1.04	0.67	0.98	12	12	12	16	16	16	0.397959	-0.921406	0.53125	-0.632523	0.7	-0.356675	1.05051	0.049271	0.676768	-0.390427	0.970297	-0.030153
283394	26	38	1	1	1	1	16.8475	0	0	0	0	0	0	0	0	0	0	1	0	0	0	0.3	0.58	1.1	1.24	0.52	1.25	12	12	12	16	16	16	0.306122	-1.18377	0.604167	-0.503905	1.1	0.0953102	1.25253	0.225162	0.525253	-0.643876	1.23762	0.213193
283395	28	40	1	1	1	1	20.9042	0	0	0	1	0	0	0	0	0	0	0	0	0	0	1.5	0.46	0.7	0.8	0.44	1.16	13	13	13	17	17	17	1.53061	0.425668	0.479167	-0.735707	0.7	-0.356675	0.808081	-0.213093	0.458333	-0.780159	1.13725	0.128617
208455	34	39	0	1	1	0	24.2275	0	1	0	0	0	0	0	0	0	0	0	0	0	0	0.69	0.53	1	0.86	0.48	0.76	12	12	12	16	16	16	0.704082	-0.350861	0.552083	-0.594056	1	0	0.868687	-0.140773	0.484848	-0.723919	0.752475	-0.284387
287007	28	40	1	1	1	0	19.1467	0	0	0	0	0	0	0	0	0	0	1	0	0	0	0.95	1.25	0.9	1.37	1	1.22	12	12	12	17	17	17	0.969388	-0.0310906	1.30208	0.263966	0.9	-0.105361	1.38384	0.324861	1.04167	0.040822	1.19608	0.179048
78337	35	38	1	1	1	0	22.4813	0	1	1	1	0	0	0	0	1	0	0	0	0	0	1.75	0.85	0.9	1.07	0.7	0.78	12	12	12	16	16	16	1.78571	0.579818	0.885417	-0.121697	0.9	-0.105361	1.08081	0.077709	0.707071	-0.346625	0.772277	-0.258412
285403	27	39	1	1	0	0	21.2585	0	1	0	1	0	0	0	0	0	0	0	0	0	0	0.27	0.36	1	0.65	0.44	0.76	13	13	13	17	17	17	0.27551	-1.28913	0.375	-0.980829	1	0	0.656566	-0.420733	0.458333	-0.780159	0.745098	-0.294239
285415	29	40	1	1	0	1	19.2277	0	0	0	1	0	0	0	0	0	0	0	0	0	0	1.15	0.84	1.1	0.94	0.44	1.18	13	13	13	19	19	19	1.17347	0.159965	0.875	-0.133531	1.1	0.0953102	0.949495	-0.0518251	0.44898	-0.800778	1.13462	0.126294
283798	28	39	0	1	1	0	19.563	0	1	0	0	0	0	0	0	1	0	0	0	0	0	1.39	0.68	0.9	1.02	0.62	1.93	12	12	12	15	15	15	1.41837	0.349506	0.708333	-0.34484	0.9	-0.105361	1.02	0.0198026	0.596154	-0.517257	1.96939	0.677723
191910	30	40	1	1	1	1	22.4323	0	1	1	1	0	0	0	0	0	0	0	0	0	0	0.52	1.24	0.8	0.73	1.55	1.05	12	12	12	16	16	16	0.530612	-0.633724	1.29167	0.255933	0.8	-0.223144	0.737374	-0.30466	1.56566	0.448305	1.0396	0.0388398
247602	27	39	1	1	1	0	18.6268	0	1	0	0	0	0	0	0	0	0	0	0	0	0	1.71	0.66	1.4	1.02	0.65	1.23	12	12	12	19	19	19	1.7449	0.556696	0.6875	-0.374693	1.4	0.336472	1.0303	0.029853	0.663265	-0.41058	1.18269	0.167793
180814	34	38	1	1	1	1	28.5483	0	1	0	0	0	0	0	0	0	0	0	0	0	0	0.82	0.73	1.1	0.76	0.92	1.17	14	14	14	20	20	20	0.780952	-0.247241	0.784946	-0.24214	1.1	0.0953102	0.752475	-0.284387	1	0	1.09346	0.0893451
217344	28	38	0	1	0	1	23.6244	0	1	0	1	0	0	0	0	0	0	0	0	0	0	0.55	0.22	1.2	0.86	0.34	1.14	13	13	13	17	17	17	0.561224	-0.577634	0.229167	-1.47331	1.2	0.182322	0.868687	-0.140773	0.354167	-1.03799	1.11765	0.111226
283783	26	38	1	1	1	1	20.202	0	1	0	0	0	0	0	0	0	0	0	0	0	0	0.9	2.27	1	1.53	3.36	0.82	13	13	13	17	17	17	0.918367	-0.0851578	2.36458	0.860602	1	0	1.54545	0.435318	3.5	1.25276	0.803922	-0.218254
283041	24	39	1	1	1	1	18.5529	0	0	0	0	0	0	0	0	0	0	1	0	0	0	2.4	1.07	1.1	0.73	0.93	0.92	13	13	13	17	17	17	2.44898	0.895671	1.11458	0.108481	1.1	0.0953102	0.737374	-0.30466	0.96875	-0.0317487	0.901961	-0.103184
178459	26	40	1	1	1	1	33.3866	0	1	1	1	0	0	0	0	0	0	0	1	0	0	0.87	1.76	0.8	0.85	4.03	1.15	12	12	12	16	16	16	0.887755	-0.119059	1.83333	0.606136	0.8	-0.223144	0.858586	-0.152469	4.07071	1.40382	1.13861	0.129812
283152	24	38	1	1	1	1	18.1449	0	0	1	1	0	0	0	0	0	0	0	0	0	0	2.04	1.73	1.3	0.9	1.41	1.31	13	13	13	19	19	19	2.08163	0.733153	1.80208	0.588943	1.3	0.262364	0.909091	-0.0953102	1.43878	0.363792	1.25962	0.230806
206424	25	40	1	1	1	0	20.7612	0	1	1	1	0	0	0	0	0	0	0	0	0	0	0.95	0.68	1.1	1.36	0.65	1.07	13	13	13	21	21	21	0.969388	-0.0310906	0.708333	-0.34484	1.1	0.0953102	1.32683	0.282792	0.718232	-0.330963	0.968326	-0.0321867
168818	35	39	1	1	1	1	21.9671	0	1	1	1	0	0	0	0	0	0	0	0	0	0	0.54	0.84	1.1	1.04	0.88	1.64	12	12	12	16	16	16	0.55102	-0.595983	0.875	-0.133531	1.1	0.0953102	1.05051	0.049271	0.888889	-0.117783	1.62376	0.484746
284450	29	40	0	1	0	1	19.1075	0	0	1	1	0	0	0	0	0	0	0	0	0	0	1.08	0.54	0.9	1.61	0.93	1.48	12	12	12	17	17	17	1.10204	0.0971637	0.5625	-0.575364	0.9	-0.105361	1.62626	0.486285	0.96875	-0.0317487	1.45098	0.372239
200900	40	40	0	1	0	0	24.1415	0	1	1	1	0	0	0	0	0	0	1	0	0	0	0.78	2.86	0.9	1.35	1.89	1.36	13	13	13	17	17	17	0.795918	-0.228259	2.97917	1.09164	0.9	-0.105361	1.36364	0.310155	1.96875	0.677399	1.33333	0.287682
284540	33	40	0	1	1	0	22.6409	0	0	0	0	0	0	0	0	0	0	0	0	0	0	0.61	0.97	0.8	0.88	1.03	0.77	12	12	12	16	16	16	0.622449	-0.474094	1.01042	0.0103628	0.8	-0.223144	0.888889	-0.117783	1.0404	0.0396091	0.762376	-0.271315
283410	31	40	1	1	1	1	17.7462	0	1	0	0	0	0	0	0	0	0	0	0	0	0	1.46	1.06	1.3	0.98	0.84	0.97	12	12	12	16	16	16	1.4898	0.398639	1.10417	0.0990909	1.3	0.262364	0.989899	-0.0101524	0.848485	-0.164303	0.960396	-0.0404095
283460	30	41	1	1	1	0	20.8209	0	1	1	1	0	0	0	0	0	0	0	0	0	0	1.17	1.14	1	1.58	0.92	1.52	12	12	12	16	16	16	1.19388	0.177206	1.1875	0.17185	1	0	1.59596	0.467475	0.929293	-0.0733313	1.50495	0.40876
283488	26	38	0	1	1	1	18.2317	0	0	0	0	0	0	0	0	0	0	0	0	1	0	1.05	0.79	1.2	1.06	1.34	0.48	12	12	12	16	16	16	1.07143	0.0689929	0.822917	-0.1949	1.2	0.182322	1.07071	0.0683192	1.35354	0.30272	0.475248	-0.74392
286453	27	38	1	1	1	1	22.2656	0	0	1	1	0	0	0	0	0	0	1	0	0	0	1.78	0.69	1.4	1.34	0.61	1.65	13	13	13	17	17	17	1.81633	0.596816	0.71875	-0.330242	1.4	0.336472	1.35354	0.30272	0.635417	-0.453474	1.61765	0.480973
286519	29	40	0	1	1	1	20.061	0	0	0	0	0	0	0	0	0	0	0	0	0	0	1.27	0.59	0.9	0.71	0.51	1.17	13	13	13	17	17	17	1.29592	0.25922	0.614583	-0.486811	0.9	-0.105361	0.717172	-0.33244	0.53125	-0.632523	1.14706	0.137201
284948	33	39	0	1	1	1	24.7768	0	1	1	1	0	0	0	0	1	0	1	0	0	0	1.73	0.38	1.1	0.83	0.29	1.43	13	13	13	18	18	18	1.76531	0.568324	0.395833	-0.926762	1.1	0.0953102	0.838384	-0.176279	0.308511	-1.176	1.3619	0.308884
283338	29	35	0	1	0	1	22.4323	0	1	0	0	1	0	1	0	1	0	0	0	0	0	0.37	0.58	0.9	0.84	0.65	1.12	13	13	13	17	17	17	0.377551	-0.97405	0.604167	-0.503905	0.9	-0.105361	0.848485	-0.164303	0.677083	-0.389961	1.09804	0.0935261
283447	24	39	0	1	1	1	19.5312	0	0	0	0	0	0	0	0	0	0	0	0	0	0	1.03	0.61	1.1	1.29	0.55	1.23	12	12	12	15	15	15	1.05102	0.0497615	0.635417	-0.453474	1.1	0.0953102	1.29	0.254642	0.528846	-0.637058	1.2551	0.227217
104737	30	40	1	1	1	0	22.151	0	1	1	1	0	0	0	0	1	0	0	0	0	0	0.86	0.28	1.4	0.68	0.25	1.29	12	12	12	17	17	17	0.877551	-0.13062	0.291667	-1.23214	1.4	0.336472	0.686869	-0.375612	0.260417	-1.34547	1.26471	0.23484
282484	28	40	0	1	0	0	17.0349	0	0	0	1	0	0	0	0	0	0	0	0	0	0	1.67	0.88	0.7	0.79	0.83	1.11	13	13	13	17	17	17	1.70408	0.533026	0.916667	-0.0870114	0.7	-0.356675	0.79798	-0.225672	0.864583	-0.145508	1.08824	0.0845574
282504	24	39	0	1	1	0	18.5178	0	0	0	0	0	0	0	0	0	0	0	0	0	0	0.39	0.54	0.7	0.89	0.7	1.11	12	12	12	17	17	17	0.397959	-0.921406	0.5625	-0.575364	0.7	-0.356675	0.89899	-0.106483	0.729167	-0.315853	1.08824	0.0845574
282519	26	39	1	1	1	1	18.4265	0	0	0	0	0	0	0	0	0	0	0	0	0	0	0.81	0.28	1	0.61	0.26	0.79	13	13	13	17	17	17	0.826531	-0.190518	0.291667	-1.23214	1	0	0.616162	-0.484246	0.270833	-1.30625	0.77451	-0.255525
282523	24	39	1	1	1	1	19.7777	0	0	1	1	0	0	0	0	0	0	0	0	0	0	0.95	1.38	1.2	1.07	1.06	1.21	13	13	13	17	17	17	0.969388	-0.0310906	1.4375	0.362905	1.2	0.182322	1.08081	0.077709	1.10417	0.0990909	1.18627	0.170818
230896	31	40	1	1	1	1	20.061	0	1	0	1	0	0	0	0	0	0	0	0	0	0	1	1.37	0.9	0.93	0.9	1.5	13	13	13	17	17	17	1.02041	0.0202027	1.42708	0.355633	0.9	-0.105361	0.939394	-0.0625204	0.9375	-0.0645385	1.47059	0.385662
284636	27	41	0	1	0	0	18.662	0	0	1	1	0	0	0	0	0	0	0	0	0	0	1.51	1.12	1	1.2	0.73	0.95	13	13	13	17	17	17	1.54082	0.432312	1.16667	0.154151	1	0	1.21212	0.192372	0.760417	-0.273889	0.931373	-0.0710959
282709	29	39	1	1	1	0	21.2084	0	0	0	0	0	0	0	0	0	0	0	0	0	0	1.35	1.41	1	1.12	2.32	1.2	12	12	12	17	17	17	1.37755	0.320307	1.46875	0.384412	1	0	1.13131	0.123379	2.41667	0.882389	1.17647	0.162519
282756	27	40	0	1	1	1	18.662	0	0	0	1	0	0	0	0	0	0	0	0	0	0	1.55	0.7	1.5	0.73	0.87	1.21	12	12	12	16	16	16	1.58163	0.458458	0.729167	-0.315853	1.5	0.405465	0.737374	-0.30466	0.878788	-0.129212	1.19802	0.18067
260582	35	39	1	1	1	1	23.1911	0	1	1	0	0	0	0	0	1	0	1	0	0	0	0.36	0.93	1.1	1.6	1.01	1.18	12	12	12	15	15	15	0.367347	-1.00145	0.96875	-0.0317487	1.1	0.0953102	1.6	0.470004	0.971154	-0.0292704	1.20408	0.185717
257777	38	37	1	1	0	0	33.1556	0	1	0	1	0	0	0	0	0	0	0	0	0	0	0.43	1	1	1.05	0.85	1.16	12	12	12	17	17	17	0.438776	-0.823767	1.04167	0.040822	1	0	1.06061	0.0588405	0.885417	-0.121697	1.13725	0.128617
286533	33	38	0	1	1	1	20.8324	0	1	1	0	0	0	0	0	0	0	0	0	0	0	1.01	1.61	0.9	0.87	1.52	1.56	13	13	13	17	17	17	1.03061	0.030153	1.67708	0.517056	0.9	-0.105361	0.878788	-0.129212	1.58333	0.459532	1.52941	0.424883
147388	33	37	0	1	1	0	33.5938	0	1	1	1	0	0	0	0	1	0	1	0	0	0	0.87	0.66	1	0.86	0.93	1.17	12	12	12	17	17	17	0.887755	-0.119059	0.6875	-0.374693	1	0	0.868687	-0.140773	0.96875	-0.0317487	1.14706	0.137201
169137	28	35	0	1	0	1	25.5185	0	1	0	1	1	0	1	0	0	0	0	0	1	0	1.13	2.04	1.1	1.03	1.53	1.13	13	13	13	17	17	17	1.15306	0.14242	2.125	0.753772	1.1	0.0953102	1.0404	0.0396091	1.59375	0.46609	1.10784	0.102415
282681	30	39	1	1	0	1	22.9421	0	1	1	1	0	0	0	0	0	0	0	0	0	0	0.74	0.83	1	0.83	0.44	1.09	13	13	13	17	17	17	0.755102	-0.280902	0.864583	-0.145508	1	0	0.838384	-0.176279	0.458333	-0.780159	1.06863	0.0663751
210556	25	38	1	1	0	1	19.7599	0	1	1	1	0	0	0	0	0	0	0	0	0	0	1.36	0.76	1.1	1.16	1.15	1.72	12	12	12	15	15	15	1.38776	0.327687	0.791667	-0.233615	1.1	0.0953102	1.16	0.14842	1.10577	0.100541	1.7551	0.562527
284969	27	39	0	1	1	0	18.6709	0	0	0	0	0	0	0	0	0	0	0	0	0	0	0.84	0.34	0.6	1.28	1.9	1.23	12	12	12	17	17	17	0.857143	-0.154151	0.354167	-1.03799	0.6	-0.510826	1.29293	0.25691	1.97917	0.682676	1.20588	0.187212
284990	26	40	0	1	1	1	23.9188	0	0	1	1	0	0	0	0	0	0	0	0	0	0	1.23	1.09	1.2	1.54	1.86	1.45	12	12	12	16	16	16	1.2551	0.227217	1.13542	0.127	1.2	0.182322	1.55556	0.441833	1.87879	0.630627	1.43564	0.361613
280022	24	39	0	1	1	1	16.901	0	0	0	1	0	0	0	0	0	0	0	0	1	0	1.03	0.44	0.7	0.82	0.36	1.45	12	12	12	16	16	16	1.05102	0.0497615	0.458333	-0.780159	0.7	-0.356675	0.828283	-0.188401	0.363636	-1.0116	1.43564	0.361613
283774	26	39	1	1	0	1	19.3962	0	0	1	0	0	0	0	0	0	0	0	0	0	0	0.91	1.12	1	1.3	2.12	0.93	12	12	12	16	16	16	0.928571	-0.074108	1.16667	0.154151	1	0	1.31313	0.272415	2.14141	0.761466	0.920792	-0.082521
138859	30	40	0	1	1	1	23.4221	0	1	0	0	0	0	0	0	0	0	0	0	0	0	0.57	1.1	0.9	1.02	1.11	1.21	12	12	12	16	16	16	0.581633	-0.541916	1.14583	0.136132	0.9	-0.105361	1.0303	0.029853	1.12121	0.11441	1.19802	0.18067
159649	29	38	0	1	1	0	17.6309	0	1	1	0	0	0	0	0	0	0	0	0	0	0	1.91	2.47	0.8	1.13	1.19	1.46	12	12	12	17	17	17	1.94898	0.667306	2.57292	0.94504	0.8	-0.223144	1.14141	0.132268	1.23958	0.214775	1.43137	0.358634
282544	25	36	0	1	1	1	18.7783	0	0	0	0	1	0	1	0	0	0	0	0	0	0	0.74	0.55	0.8	0.35	0.52	0.91	13	13	13	16	16	16	0.755102	-0.280902	0.572917	-0.557015	0.8	-0.223144	0.353535	-1.03977	0.525253	-0.643876	0.90099	-0.104261
282916	26	40	0	1	1	1	16.0231	0	0	0	0	0	0	0	0	0	0	0	0	0	0	0.53	1.16	0.8	1.37	1.24	0.79	13	13	13	18	18	18	0.540816	-0.614676	1.20833	0.189242	0.8	-0.223144	1.38384	0.324861	1.31915	0.276987	0.752381	-0.284512
282919	31	39	0	1	1	0	19.1467	0	0	0	0	0	0	0	0	0	0	0	0	0	0	1.56	0.64	1	1.3	0.78	0.88	12	12	12	16	16	16	1.59184	0.464889	0.666667	-0.405465	1	0	1.31313	0.272415	0.787879	-0.238411	0.871287	-0.137784
216515	24	39	1	1	1	1	23.5865	0	1	0	0	0	0	0	0	0	0	1	0	0	0	0.49	0.73	0.9	0.85	0.53	1.06	12	12	12	16	16	16	0.5	-0.693147	0.760417	-0.273889	0.9	-0.105361	0.858586	-0.152469	0.535354	-0.624828	1.0495	0.0483186
282940	34	40	0	1	1	1	22.0386	0	0	0	0	0	0	0	1	0	0	0	0	0	0	2.68	2.17	1.2	0.82	2.01	1.52	13	13	13	17	17	17	2.73469	1.00602	2.26042	0.815549	1.2	0.182322	0.828283	-0.188401	2.09375	0.738957	1.4902	0.398908
282951	22	40	0	1	0	1	18.0802	0	0	0	1	0	0	0	0	0	0	0	0	0	0	0.79	0.75	1.3	0.71	0.68	1.21	12	12	12	17	17	17	0.806122	-0.21552	0.78125	-0.24686	1.3	0.262364	0.717172	-0.33244	0.708333	-0.34484	1.18627	0.170818
255770	26	38	0	1	0	0	22.5827	0	1	0	0	0	0	0	0	0	0	0	0	0	0	1.11	1.11	1.4	0.57	0.95	1.71	12	12	12	17	17	17	1.13265	0.124563	1.15625	0.145182	1.4	0.336472	0.575758	-0.552069	0.989583	-0.0104713	1.67647	0.516691
278211	24	39	0	1	1	0	23.1718	0	0	0	0	0	0	0	0	0	0	0	0	0	0	1.81	1.21	1	1.04	1.53	2.19	12	12	12	17	17	17	1.84694	0.61353	1.26042	0.231442	1	0	1.05051	0.049271	1.59375	0.46609	2.14706	0.764099
193506	29	39	1	1	1	1	24.974	0	1	0	0	0	0	0	0	0	0	1	0	0	0	0.39	0.48	0.8	1.14	0.57	0.93	13	13	13	16	16	16	0.397959	-0.921406	0.5	-0.693147	0.8	-0.223144	1.15152	0.141079	0.575758	-0.552069	0.920792	-0.082521
225224	29	40	0	1	0	1	18.75	0	1	1	1	0	0	0	0	0	0	0	0	0	0	0.59	0.58	1	1.08	0.56	1.06	12	12	12	16	16	16	0.602041	-0.50743	0.604167	-0.503905	1	0	1.09091	0.0870114	0.565657	-0.569768	1.0495	0.0483186
283024	27	39	1	1	1	1	20.061	0	1	1	1	0	0	0	0	0	0	0	0	0	0	2	1.92	0.9	2.08	1.45	1.03	13	13	13	17	17	17	2.04082	0.71335	2	0.693147	0.9	-0.105361	2.10101	0.742418	1.51042	0.412386	1.0098	0.00975617
283081	29	41	1	1	0	1	24.6711	0	1	1	0	0	0	0	0	0	0	0	0	0	0	0.88	1.37	1.2	2.18	1.27	1.39	13	13	13	18	18	18	0.897959	-0.107631	1.42708	0.355633	1.2	0.182322	2.20202	0.789375	1.35106	0.300892	1.32381	0.280514
286207	23	39	1	1	0	0	19.9792	0	0	0	0	0	0	0	0	0	0	0	0	0	0	1.87	1.04	1.2	1.32	1.17	1.59	13	13	13	17	17	17	1.90816	0.646141	1.08333	0.0800427	1.2	0.182322	1.33333	0.287682	1.21875	0.197826	1.55882	0.443931
283567	32	39	0	1	1	0	25.2092	0	1	0	0	0	0	0	0	0	0	0	0	0	0	1.43	0.87	0.9	0.89	0.81	1.3	13	13	13	17	17	17	1.45918	0.377877	0.90625	-0.0984401	0.9	-0.105361	0.89899	-0.106483	0.84375	-0.169899	1.27451	0.242562
283592	34	39	0	1	1	1	22.0604	0	1	0	0	0	0	0	0	1	0	1	0	0	0	1.75	0.59	1.1	1.17	0.39	1.46	12	12	12	17	17	17	1.78571	0.579818	0.614583	-0.486811	1.1	0.0953102	1.18182	0.167054	0.40625	-0.900787	1.43137	0.358634
230061	28	39	0	1	1	1	20.1733	0	1	0	0	0	0	0	0	1	0	0	0	0	0	1.24	1.36	1	0.98	1.44	0.9	13	13	13	18	18	18	1.26531	0.235314	1.41667	0.348307	1	0	0.989899	-0.0101524	1.53191	0.426519	0.857143	-0.154151
283642	35	39	0	1	1	1	23.4952	0	1	0	0	0	0	0	0	1	0	0	0	0	0	0.91	0.7	1	0.56	0.87	1.51	12	12	12	16	16	16	0.928571	-0.074108	0.729167	-0.315853	1	0	0.565657	-0.569768	0.878788	-0.129212	1.49505	0.402159
192687	29	39	1	1	0	0	20.5457	0	1	1	1	0	0	0	0	0	0	1	0	0	0	3.05	3.26	1.2	1.11	2.03	1.63	13	13	13	16	16	16	3.11224	1.13534	3.39583	1.22255	1.2	0.182322	1.12121	0.11441	2.05051	0.718086	1.61386	0.47863
284309	24	38	1	1	0	1	24.9604	0	0	0	0	0	0	0	1	0	0	0	0	0	0	1.14	1.99	1.6	1.44	1.96	1.18	13	13	13	17	17	17	1.16327	0.151231	2.07292	0.728957	1.6	0.470004	1.45455	0.374693	2.04167	0.713766	1.15686	0.145712
284356	30	39	0	1	1	1	20.9485	0	1	0	1	0	0	0	0	0	0	0	0	0	0	1.36	0.74	1	0.63	1.03	1.36	13	13	13	18	18	18	1.38776	0.327687	0.770833	-0.260283	1	0	0.636364	-0.451985	1.09574	0.0914342	1.29524	0.258695
283813	25	39	1	1	1	1	21.2585	0	0	0	0	0	0	0	0	0	0	1	0	1	0	0.69	0.59	0.9	0.84	0.76	0.93	12	12	12	16	16	16	0.704082	-0.350861	0.614583	-0.486811	0.9	-0.105361	0.848485	-0.164303	0.767677	-0.264387	0.920792	-0.082521
272754	34	41	0	1	1	1	20.3125	0	1	0	0	0	0	0	0	0	0	0	0	0	0	0.63	0.87	0.7	0.6	0.97	0.67	12	12	12	18	18	18	0.642857	-0.441833	0.90625	-0.0984401	0.7	-0.356675	0.606061	-0.500775	1.03191	0.0314162	0.638095	-0.449268
283986	26	39	1	1	1	1	20.9644	0	0	1	0	0	0	0	0	0	0	0	0	0	0	1.42	0.9	0.8	1.07	0.56	1.43	12	12	12	16	16	16	1.44898	0.37086	0.9375	-0.0645385	0.8	-0.223144	1.08081	0.077709	0.565657	-0.569768	1.41584	0.347724
283997	32	39	1	1	1	1	24.3359	0	1	0	0	0	0	0	0	1	0	0	0	0	0	1.64	0.98	1.3	1.24	0.9	1.18	12	12	12	17	17	17	1.67347	0.514899	1.02083	0.0206193	1.3	0.262364	1.25253	0.225162	0.9375	-0.0645385	1.15686	0.145712
134243	28	38	0	1	0	0	21.5052	0	1	0	0	0	0	0	0	0	0	0	0	0	0	1.23	0.91	0.9	1.01	0.68	1.29	13	13	13	17	17	17	1.2551	0.227217	0.947917	-0.0534887	0.9	-0.105361	1.0202	0.0200007	0.708333	-0.34484	1.26471	0.23484
233300	32	41	0	1	1	1	20.1286	0	1	0	0	0	0	0	0	0	0	0	0	0	0	1.14	0.63	0.8	0.69	0.5	1.1	11	11	11	16	16	16	1.2	0.182322	0.642857	-0.441833	0.8	-0.223144	0.69697	-0.361013	0.505051	-0.683097	1.08911	0.0853598
276381	31	39	1	1	1	1	21.83	0	0	1	0	0	0	0	0	0	0	0	0	0	0	1.34	1.29	1.3	1.35	0.69	1.28	12	12	12	16	16	16	1.36735	0.312872	1.34375	0.295464	1.3	0.262364	1.36364	0.310155	0.69697	-0.361013	1.26733	0.23691
282050	33	40	0	1	0	1	21.3656	0	0	1	0	0	0	0	0	0	0	0	0	0	0	1.34	0.77	1	1.3	0.71	1.55	13	13	13	17	17	17	1.36735	0.312872	0.802083	-0.220543	1	0	1.31313	0.272415	0.739583	-0.301668	1.51961	0.418452
206514	34	39	1	1	0	0	20.5442	0	1	1	1	0	0	0	0	1	0	0	0	0	0	0.7	1.72	1	1.11	1.22	1.13	13	13	13	17	17	17	0.714286	-0.336472	1.79167	0.583146	1	0	1.12121	0.11441	1.27083	0.239673	1.10784	0.102415
282090	26	39	1	1	0	1	18.4202	0	1	0	1	0	0	0	0	1	0	0	0	0	0	1.09	0.73	1	0.72	0.98	0.91	12	12	12	16	16	16	1.11224	0.10638	0.760417	-0.273889	1	0	0.727273	-0.318454	0.989899	-0.0101524	0.90099	-0.104261
222953	28	41	0	1	1	1	22.0386	0	1	0	0	0	0	0	0	0	0	0	0	0	0	0.57	1.19	1.3	0.57	0.92	0.93	13	13	13	18	18	18	0.581633	-0.541916	1.23958	0.214775	1.3	0.262364	0.575758	-0.552069	0.978723	-0.0215062	0.885714	-0.121361
181951	20	39	1	1	0	0	18.026	0	1	1	1	0	0	0	0	0	0	0	0	0	0	0.56	1.27	0.8	1.02	0.95	1.01	11	11	11	17	17	17	0.589474	-0.528525	1.29592	0.25922	0.8	-0.223144	1.0303	0.029853	0.989583	-0.0104713	0.990196	-0.0098523
284218	23	39	1	1	1	1	19.2234	0	0	0	0	0	0	0	0	0	0	0	0	0	0	1.2	1.85	0.7	1.38	2.59	1.03	13	13	13	16	16	16	1.22449	0.202524	1.92708	0.656008	0.7	-0.356675	1.39394	0.332134	2.61616	0.961708	1.0198	0.0196085
241136	32	40	1	1	0	0	18.2183	0	1	1	1	0	0	0	0	0	0	0	0	0	0	1.33	1.83	0.4	1.13	0.85	1.14	13	13	13	19	19	19	1.35714	0.305382	1.90625	0.645138	0.4	-0.916291	1.14141	0.132268	0.867347	-0.142316	1.09615	0.0918075
254241	32	36	0	1	1	1	19.1406	0	1	1	1	1	0	1	0	1	0	0	0	0	0	1.01	1	0.7	1.26	0.74	0.84	12	12	12	16	16	16	1.03061	0.030153	1.04167	0.040822	0.7	-0.356675	1.27273	0.241162	0.747475	-0.291055	0.831683	-0.184304
284143	28	38	1	0	1	1	27.6817	0	0	1	0	0	0	0	0	0	0	1	0	0	0	1.6	1.93	1.4	1.43	2.41	1.08	13	13	13	17	17	17	1.63265	0.490206	2.01042	0.698342	1.4	0.336472	1.44444	0.367725	2.51042	0.920449	1.05882	0.0571584
284151	27	40	0	1	1	1	18.8271	0	0	0	0	0	0	0	0	0	0	0	0	0	0	1.49	0.59	0.8	0.82	0.43	1.38	12	12	12	17	17	17	1.52041	0.418979	0.614583	-0.486811	0.8	-0.223144	0.828283	-0.188401	0.447917	-0.803148	1.35294	0.302281
284194	25	39	1	1	1	1	23.3772	0	0	0	0	0	0	0	0	0	0	0	0	0	0	1.81	0.48	1.4	0.9	0.36	1.33	13	13	13	18	18	18	1.84694	0.61353	0.5	-0.693147	1.4	0.336472	0.909091	-0.0953102	0.382979	-0.959776	1.26667	0.236389
284199	30	40	0	1	0	0	22.4323	0	1	1	0	0	0	0	0	1	0	0	0	0	0	0.73	1.29	1.1	0.81	1.09	1.26	13	13	13	17	17	17	0.744898	-0.294508	1.34375	0.295464	1.1	0.0953102	0.818182	-0.200671	1.13542	0.127	1.23529	0.211309
227019	25	39	0	1	1	0	24.8016	0	1	1	1	0	0	0	0	0	0	0	0	0	0	0.5	0.98	0.7	0.71	0.69	1.09	12	12	12	15	15	15	0.510204	-0.672944	1.02083	0.0206193	0.7	-0.356675	0.71	-0.34249	0.663462	-0.410284	1.11224	0.10638
284357	20	39	0	1	0	0	19.2277	0	0	0	1	0	0	0	0	0	0	0	0	0	0	2.86	2.98	0.9	1.4	3.34	1.37	13	13	13	19	19	19	2.91837	1.07102	3.10417	1.13275	0.9	-0.105361	1.41414	0.346523	3.40816	1.22617	1.31731	0.27559
282977	31	38	1	0	1	1	23.4375	0	1	1	0	0	0	0	0	0	0	0	0	0	0	1.58	0.64	0.7	0.78	0.7	1.36	12	12	12	15	15	15	1.61224	0.477628	0.666667	-0.405465	0.7	-0.356675	0.78	-0.248461	0.673077	-0.395896	1.38776	0.327687
282997	28	39	0	1	1	1	20.202	0	0	0	0	0	0	0	0	0	0	0	0	0	0	0.83	1.02	0.9	1.07	1.59	0.86	13	13	13	17	17	17	0.846939	-0.166127	1.0625	0.0606246	0.9	-0.105361	1.08081	0.077709	1.65625	0.504556	0.843137	-0.170626
283014	33	39	0	1	1	1	23.7088	0	1	0	0	0	0	0	0	1	0	0	0	0	0	0.59	0.36	1	0.61	0.48	1.19	12	12	12	16	16	16	0.602041	-0.50743	0.375	-0.980829	1	0	0.616162	-0.484246	0.484848	-0.723919	1.17822	0.164003
220613	23	39	1	1	0	0	27.5155	0	1	0	0	0	0	0	0	0	0	0	0	0	0	1.57	2.09	0.9	0.69	0.82	1.19	13	13	13	17	17	17	1.60204	0.471278	2.17708	0.777986	0.9	-0.105361	0.69697	-0.361013	0.854167	-0.157629	1.16667	0.154151
282396	26	40	0	1	1	0	19.9481	0	0	0	0	0	0	0	0	0	0	0	0	0	0	0.33	0.35	1.1	0.67	0.38	0.94	12	12	12	17	17	17	0.336735	-1.08846	0.364583	-1.009	1.1	0.0953102	0.676768	-0.390427	0.395833	-0.926762	0.921569	-0.081678
285258	29	38	1	1	1	1	21.4844	0	0	0	0	0	0	0	0	0	0	1	0	0	0	2.06	1.2	1.1	1.13	0.82	0.98	12	12	12	16	16	16	2.10204	0.742909	1.25	0.223144	1.1	0.0953102	1.14141	0.132268	0.828283	-0.188401	0.970297	-0.030153
284590	29	39	0	1	1	1	28.3447	0	0	0	0	0	0	0	0	0	0	0	0	0	0	1.2	1.68	1.2	0.87	1.27	0.96	13	13	13	17	17	17	1.22449	0.202524	1.75	0.559616	1.2	0.182322	0.878788	-0.129212	1.32292	0.279839	0.941176	-0.0606246
187441	26	39	0	1	1	1	20.0692	0	1	0	0	0	0	0	0	0	0	0	0	0	0	0.95	0.8	0.9	1.52	0.77	1.2	11	11	11	15	15	15	1	0	0.816327	-0.202941	0.9	-0.105361	1.52	0.41871	0.740385	-0.300585	1.22449	0.202524
224786	30	39	0	1	0	0	27.4395	0	1	1	0	0	0	0	0	1	0	1	0	0	0	1.95	2.37	1.3	0.91	1.33	1.4	13	13	13	17	17	17	1.9898	0.688032	2.46875	0.903712	1.3	0.262364	0.919192	-0.0842603	1.38542	0.326001	1.37255	0.31667
284905	24	35	1	1	1	0	18.2183	0	0	0	1	1	0	1	0	0	0	1	0	0	0	0.7	0.55	1.1	0.96	1.14	1.31	12	12	12	16	16	16	0.714286	-0.336472	0.572917	-0.557015	1.1	0.0953102	0.969697	-0.0307717	1.15152	0.141079	1.29703	0.260077
200468	35	39	1	1	1	1	18.3594	0	1	1	0	0	0	0	0	0	0	1	0	0	0	0.71	1.74	0.7	1.14	1.23	1.1	13	13	13	17	17	17	0.72449	-0.322288	1.8125	0.594707	0.7	-0.356675	1.15152	0.141079	1.28125	0.247836	1.07843	0.0755076
113393	29	41	1	1	0	1	22.0124	0	1	0	1	0	0	0	0	0	0	0	0	0	0	1.03	0.8	1.5	0.96	0.78	1.11	13	13	13	17	17	17	1.05102	0.0497615	0.833333	-0.182322	1.5	0.405465	0.969697	-0.0307717	0.8125	-0.207639	1.08824	0.0845574
249144	28	40	0	1	0	0	19.4797	0	1	0	1	0	0	0	0	0	0	0	0	0	0	0.43	2.2	1	1.27	2.14	1.26	13	13	13	17	17	17	0.438776	-0.823767	2.29167	0.829279	1	0	1.28283	0.249067	2.22917	0.801628	1.23529	0.211309
282671	18	38	1	1	1	0	18.2899	0	0	0	0	0	0	0	0	0	0	0	0	0	0	0.64	1.35	0.9	1.17	1.19	0.88	13	13	13	17	17	17	0.653061	-0.426084	1.40625	0.340927	0.9	-0.105361	1.18182	0.167054	1.23958	0.214775	0.862745	-0.147636
282684	32	39	0	1	1	1	16.0231	0	1	0	0	0	0	0	0	0	0	0	0	0	0	0.57	1.68	0.8	0.77	1.41	0.86	12	12	12	16	16	16	0.581633	-0.541916	1.75	0.559616	0.8	-0.223144	0.777778	-0.251314	1.42424	0.35364	0.851485	-0.160773
279979	25	40	0	1	1	1	20.7152	0	0	1	1	0	0	0	0	0	0	0	0	0	0	1.27	0.61	0.9	1.02	0.76	1.09	12	12	12	16	16	16	1.29592	0.25922	0.635417	-0.453474	0.9	-0.105361	1.0303	0.029853	0.767677	-0.264387	1.07921	0.0762274
282328	31	40	1	1	1	1	22.4103	0	0	0	1	0	0	0	0	0	0	1	0	0	0	1.42	1.12	0.9	1.25	1.31	1.11	12	12	12	16	16	16	1.44898	0.37086	1.16667	0.154151	0.9	-0.105361	1.26263	0.233194	1.32323	0.280077	1.09901	0.0944097
282344	28	39	1	1	1	0	19.1701	0	0	1	1	0	0	0	0	0	0	0	0	0	0	0.56	0.59	0.8	1.02	1.2	1.41	12	12	12	16	16	16	0.571429	-0.559616	0.614583	-0.486811	0.8	-0.223144	1.0303	0.029853	1.21212	0.192372	1.39604	0.333639
282429	27	40	1	1	1	1	18.4781	0	0	0	1	0	0	0	0	0	0	0	0	0	0	0.86	1.16	0.8	1.45	1.37	0.8	13	13	13	17	17	17	0.877551	-0.13062	1.20833	0.189242	0.8	-0.223144	1.46465	0.381614	1.42708	0.355633	0.784314	-0.242946
282458	30	38	0	1	1	1	21.2071	0	0	0	0	0	0	0	0	0	0	0	0	0	0	1.84	0.92	0.9	0.6	0.98	0.95	12	12	12	16	16	16	1.87755	0.629968	0.958333	-0.0425596	0.9	-0.105361	0.606061	-0.500775	0.989899	-0.0101524	0.940594	-0.0612436
284062	25	38	1	1	1	1	18.4425	0	0	0	1	0	0	0	0	0	0	0	0	0	0	1.53	0.58	1.2	0.8	0.55	1.42	13	13	13	18	18	18	1.56122	0.44547	0.604167	-0.503905	1.2	0.182322	0.808081	-0.213093	0.585106	-0.535962	1.35238	0.301867
284586	28	37	1	1	1	1	17.6693	0	1	1	0	0	0	0	0	0	0	0	0	0	0	1.6	2.93	1.3	0.95	1.26	1.12	12	12	12	17	17	17	1.63265	0.490206	3.05208	1.11582	1.3	0.262364	0.959596	-0.041243	1.3125	0.271934	1.09804	0.0935261
284592	41	40	1	1	0	0	19.9219	0	1	1	0	0	0	0	0	0	0	0	0	0	0	2.3	0.55	0.9	1.41	0.85	1.74	13	13	13	19	19	19	2.34694	0.853112	0.572917	-0.557015	0.9	-0.105361	1.42424	0.35364	0.867347	-0.142316	1.67308	0.514664
284600	37	39	0	1	0	1	18.8189	0	1	1	1	0	0	0	0	0	0	0	0	0	0	1.88	0.7	1	1.27	0.54	1.43	13	13	13	17	17	17	1.91837	0.651474	0.729167	-0.315853	1	0	1.28283	0.249067	0.5625	-0.575364	1.40196	0.337872
258746	34	40	1	1	0	1	23.2335	0	0	0	0	0	0	0	1	0	0	0	0	0	0	5.09	0.46	1.4	1.01	0.22	1.17	12	12	12	17	17	17	5.19388	1.64748	0.479167	-0.735707	1.4	0.336472	1.0202	0.0200007	0.229167	-1.47331	1.14706	0.137201
284780	29	40	0	1	1	1	21.7778	0	0	0	0	0	0	0	0	0	0	0	0	0	0	1.03	1.26	1.1	1.02	1.44	1.15	13	13	13	17	17	17	1.05102	0.0497615	1.3125	0.271934	1.1	0.0953102	1.0303	0.029853	1.5	0.405465	1.12745	0.119959
284813	25	41	1	1	0	1	18.9181	0	0	0	0	0	0	0	0	0	0	0	0	0	0	1.34	0.44	0.9	0.95	0.48	0.96	11	11	11	16	16	16	1.41053	0.343963	0.44898	-0.800778	0.9	-0.105361	0.959596	-0.041243	0.484848	-0.723919	0.950495	-0.0507723
240686	28	38	0	0	0	0	17.9418	0	1	1	1	0	0	0	0	0	0	1	0	0	0	1.35	2.3	0.7	1.27	2.52	0.99	12	12	12	18	18	18	1.37755	0.320307	2.39583	0.873731	0.7	-0.356675	1.28283	0.249067	2.68085	0.986134	0.942857	-0.0588405
283771	38	39	1	1	1	1	23.4375	0	1	0	0	0	0	0	0	1	0	0	0	0	0	1.29	2.31	0.8	1.34	1.7	1.05	12	12	12	17	17	17	1.31633	0.274845	2.40625	0.87807	0.8	-0.223144	1.35354	0.30272	1.77083	0.57145	1.02941	0.0289875
283812	26	39	1	1	0	0	19.7035	0	0	0	1	0	0	0	0	0	0	0	0	0	0	1.19	0.72	1	0.86	0.43	1.34	12	12	12	16	16	16	1.21429	0.194156	0.75	-0.287682	1	0	0.868687	-0.140773	0.434343	-0.83392	1.32673	0.282719
70866	38	39	0	1	1	1	22.5153	0	1	0	0	0	0	0	0	1	0	1	0	0	0	0.27	0.56	1.1	1.25	0.77	1.06	11	11	11	17	17	17	0.284211	-1.25804	0.571429	-0.559616	1.1	0.0953102	1.26263	0.233194	0.802083	-0.220543	1.03922	0.0384663
199204	34	39	0	1	0	0	17.6693	0	1	0	0	0	0	0	0	0	0	0	0	0	0	1.08	0.54	1	0.9	0.58	1.26	13	13	13	19	19	19	1.10204	0.0971637	0.5625	-0.575364	1	0	0.909091	-0.0953102	0.591837	-0.524524	1.21154	0.191891
283168	32	38	1	1	0	0	20.3244	0	1	1	0	0	0	0	0	0	0	0	0	0	0	0.58	0.76	1	1.32	0.56	2.64	12	12	12	20	20	20	0.591837	-0.524524	0.791667	-0.233615	1	0	1.30693	0.267681	0.608696	-0.496437	2.46729	0.90312
283194	28	38	1	1	1	1	17.9688	0	0	0	0	0	0	0	0	0	0	0	0	0	0	1.88	2.96	1	1.09	3.12	1.02	12	12	12	17	17	17	1.91837	0.651474	3.08333	1.12601	1	0	1.10101	0.096228	3.25	1.17865	1	0
283229	27	40	1	1	1	1	19.5717	0	0	1	1	0	0	0	0	0	0	0	0	0	0	1.91	3.12	1.1	0.95	3.14	0.9	12	12	12	16	16	16	1.94898	0.667306	3.25	1.17865	1.1	0.0953102	0.959596	-0.041243	3.17172	1.15427	0.891089	-0.115311
169242	25	38	1	1	0	1	22.4813	0	1	0	1	0	0	0	0	0	0	0	0	0	0	1.09	1.01	1.1	0.79	0.66	1.29	13	13	13	17	17	17	1.11224	0.10638	1.05208	0.0507723	1.1	0.0953102	0.79798	-0.225672	0.6875	-0.374693	1.26471	0.23484
152346	29	39	0	1	1	1	18.8023	0	1	1	1	0	0	0	0	0	0	0	0	0	0	0.65	2.41	0.8	0.94	2.15	1.53	12	12	12	17	17	17	0.663265	-0.41058	2.51042	0.920449	0.8	-0.223144	0.949495	-0.0518251	2.23958	0.80629	1.5	0.405465
286084	25	36	1	1	1	0	22.806	0	0	0	0	1	0	1	0	0	0	1	0	0	0	0.48	0.23	1	1.65	0.31	1.09	13	13	13	17	17	17	0.489796	-0.713766	0.239583	-1.42885	1	0	1.66667	0.510826	0.322917	-1.13036	1.06863	0.0663751
283907	27	39	1	1	0	0	28.441	0	0	1	0	0	0	0	0	0	0	0	0	0	0	0.94	0.9	1.1	0.51	0.5	0.91	14	14	14	18	18	18	0.895238	-0.110666	0.967742	-0.0327898	1.1	0.0953102	0.515152	-0.663294	0.531915	-0.631272	0.866667	-0.143101
96166	31	40	1	1	1	1	23.4952	0	1	0	0	0	0	0	0	0	0	0	0	0	0	0.68	1.26	1	0.9	2.39	0.76	13	13	13	16	16	16	0.693878	-0.36546	1.3125	0.271934	1	0	0.909091	-0.0953102	2.41414	0.881344	0.752475	-0.284387
284087	33	39	1	1	1	1	21.2891	0	1	1	1	0	0	0	0	0	0	1	0	0	0	0.78	2.12	0.9	1.06	1.64	0.92	13	13	13	17	17	17	0.795918	-0.228259	2.20833	0.792238	0.9	-0.105361	1.07071	0.0683192	1.70833	0.535518	0.901961	-0.103184
140702	29	38	0	1	1	1	20.4491	0	1	0	1	0	0	0	0	0	0	0	0	0	0	0.45	0.73	0.8	0.91	0.83	0.82	12	12	12	16	16	16	0.459184	-0.778305	0.760417	-0.273889	0.8	-0.223144	0.919192	-0.0842603	0.838384	-0.176279	0.811881	-0.208401
284137	30	38	1	1	0	0	20.9572	0	1	0	1	0	0	0	0	0	0	0	0	0	0	0.93	1.59	0.8	0.73	1.24	0.93	13	13	13	17	17	17	0.94898	-0.052368	1.65625	0.504556	0.8	-0.223144	0.737374	-0.30466	1.29167	0.255933	0.911765	-0.0923733
282645	30	40	1	1	1	0	18.9069	0	1	0	0	0	0	0	0	0	0	0	0	0	0	1.94	0.65	1.3	1.34	0.54	1.37	14	14	14	17	17	17	1.84762	0.613898	0.698925	-0.358212	1.3	0.262364	1.35354	0.30272	0.5625	-0.575364	1.34314	0.295008
283260	32	39	0	1	1	1	21.8944	0	1	0	0	0	0	0	0	1	0	0	0	0	0	1.22	1.12	1	1.14	0.7	1.15	11	11	11	15	15	15	1.28421	0.250144	1.14286	0.133531	1	0	1.14	0.131028	0.673077	-0.395896	1.17347	0.159965
282715	25	41	0	1	1	1	17.3438	0	0	1	1	0	0	0	0	0	0	0	0	0	0	0.76	0.42	0.7	0.82	0.6	1.61	13	13	13	17	17	17	0.77551	-0.254234	0.4375	-0.826679	0.7	-0.356675	0.828283	-0.188401	0.625	-0.470004	1.57843	0.456432
284946	31	39	1	1	1	1	24.0346	0	1	0	0	0	0	0	0	0	0	1	0	0	0	1.12	1.32	0.8	0.89	1.34	1.04	14	14	14	19	19	19	1.06667	0.0645385	1.41935	0.350202	0.8	-0.223144	0.89899	-0.106483	1.36735	0.312872	1	0
284956	28	41	0	1	1	1	19.433	0	0	0	0	0	0	0	0	0	0	0	0	0	0	0.57	1.47	0.9	0.91	1.18	1.38	13	13	13	17	17	17	0.581633	-0.541916	1.53125	0.426084	0.9	-0.105361	0.919192	-0.0842603	1.22917	0.206336	1.35294	0.302281
188899	29	40	0	1	1	0	17.9982	0	1	1	1	0	0	0	0	0	0	0	0	0	0	0.63	1.11	0.7	0.45	0.75	0.84	12	12	12	16	16	16	0.642857	-0.441833	1.15625	0.145182	0.7	-0.356675	0.454545	-0.788457	0.757576	-0.277632	0.831683	-0.184304
282186	32	40	0	1	1	1	20.7101	0	0	0	0	0	0	0	0	0	0	0	0	0	0	1.37	2.08	0.7	2.06	3.32	1.15	13	13	13	17	17	17	1.39796	0.335013	2.16667	0.77319	0.7	-0.356675	2.08081	0.732756	3.45833	1.24079	1.12745	0.119959
239006	27	40	1	1	1	1	22.0741	0	1	0	0	0	0	0	0	0	0	0	0	0	0	1.04	1.06	1	0.94	1.13	1.56	12	12	12	16	16	16	1.06122	0.0594234	1.10417	0.0990909	1	0	0.949495	-0.0518251	1.14141	0.132268	1.54455	0.434735
228836	31	39	0	1	1	1	20.2437	0	1	1	1	0	0	0	0	0	0	0	0	0	0	2.31	1.49	1.1	1.09	0.72	1.28	12	12	12	18	18	18	2.35714	0.85745	1.55208	0.439598	1.1	0.0953102	1.10101	0.096228	0.765957	-0.266629	1.21905	0.19807
193173	25	40	0	1	0	0	22.6562	0	1	1	1	0	0	0	0	0	0	0	0	0	0	0.38	1.72	1.5	0.67	0.58	1.05	14	14	14	18	18	18	0.361905	-1.01637	1.84946	0.614895	1.5	0.405465	0.676768	-0.390427	0.617021	-0.482852	1	0
161307	33	40	0	1	1	1	20.9366	0	1	1	0	0	0	0	0	0	0	0	0	0	0	1.33	2.06	0.8	0.72	1.14	1.21	12	12	12	17	17	17	1.35714	0.305382	2.14583	0.763528	0.8	-0.223144	0.727273	-0.318454	1.1875	0.17185	1.18627	0.170818
283242	28	39	0	1	1	1	21.0077	0	1	1	1	0	0	0	0	1	0	0	0	0	0	2.07	1.75	0.9	0.98	2.03	1.27	13	13	13	17	17	17	2.11224	0.747751	1.82292	0.600438	0.9	-0.105361	0.989899	-0.0101524	2.11458	0.748858	1.2451	0.219214
121641	34	40	1	1	1	1	20.83	0	1	0	0	0	0	0	0	1	0	0	0	0	0	1.02	0.33	0.9	1	0.36	0.78	12	12	12	17	17	17	1.04082	0.0400053	0.34375	-1.06784	0.9	-0.105361	1.0101	0.0100503	0.375	-0.980829	0.764706	-0.268264
284974	30	39	1	1	0	1	18.7917	0	0	0	0	0	0	0	0	0	0	0	0	0	0	0.86	1.55	0.9	0.77	1.41	0.7	12	12	12	18	18	18	0.877551	-0.13062	1.61458	0.479077	0.9	-0.105361	0.777778	-0.251314	1.5	0.405465	0.666667	-0.405465
285004	27	40	1	1	1	1	18.75	0	0	0	0	0	0	0	0	0	0	1	0	0	0	1.88	0.33	1.2	1.16	0.46	1.19	12	12	12	16	16	16	1.91837	0.651474	0.34375	-1.06784	1.2	0.182322	1.17172	0.15847	0.464646	-0.766478	1.17822	0.164003
285055	28	39	1	1	1	1	17.7154	0	0	0	0	0	0	0	0	0	0	0	0	0	0	0.64	2.3	1.1	1.62	2.32	1.52	13	13	13	17	17	17	0.653061	-0.426084	2.39583	0.873731	1.1	0.0953102	1.63636	0.492476	2.41667	0.882389	1.4902	0.398908
283966	27	38	0	1	1	1	18.2563	0	0	0	0	0	0	0	0	1	0	0	0	0	0	0.62	0.73	0.9	0.45	0.69	1.12	13	13	13	17	17	17	0.632653	-0.457833	0.760417	-0.273889	0.9	-0.105361	0.454545	-0.788457	0.71875	-0.330242	1.09804	0.0935261
284053	20	39	0	1	0	0	21.0938	0	0	1	1	0	0	0	0	0	0	1	0	0	0	1.02	0.5	1.5	0.83	0.4	2.1	12	12	12	15	15	15	1.04082	0.0400053	0.520833	-0.652325	1.5	0.405465	0.83	-0.18633	0.384615	-0.955511	2.14286	0.76214
247640	26	38	0	1	0	1	20.9366	0	1	0	1	0	0	0	0	0	0	0	0	0	0	1.97	0.54	0.6	0.71	0.74	1.45	13	13	13	17	17	17	2.0102	0.698236	0.5625	-0.575364	0.6	-0.510826	0.717172	-0.33244	0.770833	-0.260283	1.42157	0.351761
283855	24	37	1	1	1	1	17.6309	0	0	1	1	0	0	0	0	0	0	0	0	0	0	0.98	1.25	0.9	0.48	0.84	1.01	14	14	14	18	18	18	0.933333	-0.0689929	1.34409	0.295714	0.9	-0.105361	0.484848	-0.723919	0.893617	-0.112478	0.961905	-0.0388398
194324	28	38	1	1	0	1	19.8141	0	1	0	1	0	0	0	0	0	0	0	0	0	0	0.54	1.55	1	1.46	1.26	1.32	13	13	13	18	18	18	0.55102	-0.595983	1.61458	0.479077	1	0	1.47475	0.388487	1.34043	0.292987	1.25714	0.228842
284648	36	39	1	1	1	1	21.2084	0	1	0	0	0	0	0	0	0	0	0	0	0	0	0.4	0.79	1.3	0.95	0.47	1.17	13	13	13	16	16	16	0.408163	-0.896088	0.822917	-0.1949	1.3	0.262364	0.959596	-0.041243	0.474747	-0.744972	1.15842	0.147053
284649	25	38	1	1	1	1	23.4375	0	0	1	0	0	0	0	0	0	0	0	0	0	0	1.12	0.77	1	1	0.94	1.51	12	12	12	17	17	17	1.14286	0.133531	0.802083	-0.220543	1	0	1.0101	0.0100503	0.979167	-0.0210534	1.48039	0.392307
284692	33	39	0	1	1	1	18.9866	0	1	1	1	0	0	0	0	1	0	0	0	0	0	1.64	0.81	1	0.83	0.87	1.03	13	13	13	17	17	17	1.67347	0.514899	0.84375	-0.169899	1	0	0.838384	-0.176279	0.90625	-0.0984401	1.0098	0.00975617
284721	24	39	1	1	1	1	18.848	0	0	0	0	0	0	0	0	0	0	0	0	0	0	0.55	0.88	1.1	0.68	1.02	0.96	12	12	12	16	16	16	0.561224	-0.577634	0.916667	-0.0870114	1.1	0.0953102	0.686869	-0.375612	1.0303	0.029853	0.950495	-0.0507723
249498	27	39	1	1	0	1	23.2254	0	1	1	1	0	0	0	0	0	0	0	0	0	0	1.02	1.72	1.2	1.17	1.34	1.52	13	13	13	17	17	17	1.04082	0.0400053	1.79167	0.583146	1.2	0.182322	1.18182	0.167054	1.39583	0.333492	1.4902	0.398908
282704	30	39	1	1	0	1	18.8707	0	1	1	1	0	0	0	0	1	0	0	0	0	0	0.59	1.14	1.3	0.88	0.8	0.8	12	12	12	16	16	16	0.602041	-0.50743	1.1875	0.17185	1.3	0.262364	0.888889	-0.117783	0.808081	-0.213093	0.792079	-0.233094
282727	35	39	1	0	0	0	20.8999	0	1	1	1	0	0	0	0	0	0	0	0	0	0	0.62	1.47	0.7	1.06	1.68	1.06	12	12	12	16	16	16	0.632653	-0.457833	1.53125	0.426084	0.7	-0.356675	1.07071	0.0683192	1.69697	0.528844	1.0495	0.0483186
282818	20	38	0	1	0	0	17.8465	0	0	0	0	0	0	0	0	0	0	0	0	0	0	2.03	1.18	0.7	0.95	0.62	0.9	13	13	13	16	16	16	2.07143	0.728239	1.22917	0.206336	0.7	-0.356675	0.959596	-0.041243	0.626263	-0.467985	0.891089	-0.115311
282824	29	39	1	1	1	0	20.9644	0	0	0	0	0	0	0	0	0	0	0	0	0	0	0.56	1.35	1	1.06	2.41	0.87	13	13	13	17	17	17	0.571429	-0.559616	1.40625	0.340927	1	0	1.07071	0.0683192	2.51042	0.920449	0.852941	-0.159065
284359	32	39	1	1	1	1	26.1719	0	0	0	0	0	0	0	0	0	0	1	0	0	0	0.62	0.42	1.2	0.8	0.25	1.48	13	13	13	17	17	17	0.632653	-0.457833	0.4375	-0.826679	1.2	0.182322	0.808081	-0.213093	0.260417	-1.34547	1.45098	0.372239
285066	30	41	0	1	1	0	20.4491	0	0	0	0	0	0	0	1	0	0	0	0	0	0	1.87	0.66	0.7	0.83	0.58	1.03	13	13	13	17	17	17	1.90816	0.646141	0.6875	-0.374693	0.7	-0.356675	0.838384	-0.176279	0.604167	-0.503905	1.0098	0.00975617
171899	30	39	0	1	0	0	22.881	0	1	1	1	0	0	0	0	1	0	0	0	0	0	1.27	0.95	1.5	1.11	0.61	1.19	12	12	12	16	16	16	1.29592	0.25922	0.989583	-0.0104713	1.5	0.405465	1.12121	0.11441	0.616162	-0.484246	1.17822	0.164003
283755	34	40	0	1	1	1	17.1468	0	0	1	0	0	0	0	0	0	0	0	0	0	0	1.1	0.42	0.8	1.69	0.47	0.89	13	13	13	17	17	17	1.12245	0.115513	0.4375	-0.826679	0.8	-0.223144	1.70707	0.534779	0.489583	-0.714201	0.872549	-0.136336
279311	28	40	0	1	1	1	16.2031	0	0	0	0	0	0	0	0	0	0	0	0	0	0	0.68	0.88	1	1.02	0.97	1.22	13	13	13	17	17	17	0.693878	-0.36546	0.916667	-0.0870114	1	0	1.0303	0.029853	1.01042	0.0103628	1.19608	0.179048
282566	27	38	0	1	0	0	18.7305	0	0	0	0	0	0	0	0	0	0	0	0	0	0	1.28	1.2	1.2	0.64	0.45	1.2	12	12	12	16	16	16	1.30612	0.267063	1.25	0.223144	1.2	0.182322	0.646465	-0.436237	0.454545	-0.788457	1.18812	0.172371
282602	26	38	1	1	1	0	15.5896	0	0	0	1	0	0	0	0	0	0	0	0	0	0	1.18	0.85	1	0.8	0.74	1.36	12	12	12	16	16	16	1.20408	0.185717	0.885417	-0.121697	1	0	0.808081	-0.213093	0.747475	-0.291055	1.34653	0.297534
282619	26	40	0	1	1	1	19.052	0	0	1	0	0	0	0	0	0	0	0	0	0	0	0.83	0.94	1.2	0.75	0.84	1.36	13	13	13	17	17	17	0.846939	-0.166127	0.979167	-0.0210534	1.2	0.182322	0.757576	-0.277632	0.875	-0.133531	1.33333	0.287682
141935	33	39	1	1	1	0	17.4818	0	1	1	0	0	0	0	0	0	0	0	0	0	0	1.06	1.2	1	1.16	0.87	1.37	13	13	13	17	17	17	1.08163	0.0784716	1.25	0.223144	1	0	1.17172	0.15847	0.90625	-0.0984401	1.34314	0.295008
203491	26	35	0	1	1	1	18.2563	0	1	0	1	1	0	1	0	0	0	0	0	0	0	0.92	2.76	1	0.87	2.85	1.11	12	12	12	16	16	16	0.938776	-0.0631789	2.875	1.05605	1	0	0.878788	-0.129212	2.87879	1.05737	1.09901	0.0944097
282966	31	38	1	1	1	1	17.782	0	1	0	0	0	0	0	0	0	0	0	0	0	0	1.99	1.17	1	0.68	0.89	1.42	13	13	13	17	17	17	2.03061	0.708337	1.21875	0.197826	1	0	0.686869	-0.375612	0.927083	-0.0757118	1.39216	0.330854
194938	33	38	0	1	1	0	23.1911	0	1	0	0	0	0	0	0	0	0	1	0	0	0	0.99	3.73	0.9	0.98	3.87	1.26	12	12	12	16	16	16	1.0102	0.0101524	3.88542	1.35723	0.9	-0.105361	0.989899	-0.0101524	3.90909	1.3633	1.24752	0.221161
282834	18	41	1	1	0	0	23.0518	0	1	1	1	0	0	0	0	0	0	0	0	0	0	1.41	0.46	1	1.01	0.75	1.51	12	12	12	16	16	16	1.43878	0.363792	0.479167	-0.735707	1	0	1.0202	0.0200007	0.757576	-0.277632	1.49505	0.402159
176394	35	40	0	1	1	0	20.83	0	0	0	0	0	0	0	0	0	0	0	0	0	0	0.21	0.46	0.7	0.81	0.44	0.93	13	13	13	17	17	17	0.214286	-1.54045	0.479167	-0.735707	0.7	-0.356675	0.818182	-0.200671	0.458333	-0.780159	0.911765	-0.0923733
284396	26	39	0	1	1	1	21.2306	0	1	0	1	0	0	0	0	1	0	0	0	0	0	0.79	0.74	0.7	1.65	0.7	1.04	13	13	13	17	17	17	0.806122	-0.21552	0.770833	-0.260283	0.7	-0.356675	1.66667	0.510826	0.729167	-0.315853	1.01961	0.0194181
248903	34	37	0	1	1	1	22.0386	0	0	0	0	0	0	0	1	0	0	0	0	1	0	2.16	1.29	0.7	0.76	0.55	1.87	13	13	13	16	16	16	2.20408	0.790311	1.34375	0.295464	0.7	-0.356675	0.767677	-0.264387	0.555556	-0.587787	1.85149	0.615988
282554	30	39	1	1	1	1	29.1363	0	0	0	1	0	0	0	0	0	0	1	1	0	0	1.15	1.1	1.4	1.1	0.63	1.15	14	14	14	17	17	17	1.09524	0.0909718	1.1828	0.167881	1.4	0.336472	1.11111	0.105361	0.65625	-0.421213	1.12745	0.119959
284599	31	40	1	1	1	1	17.898	0	0	0	0	0	0	0	0	0	0	0	0	1	0	1.37	0.53	0.9	0.9	0.51	1.07	12	12	12	17	17	17	1.39796	0.335013	0.552083	-0.594056	0.9	-0.105361	0.909091	-0.0953102	0.53125	-0.632523	1.04902	0.047856
286603	33	38	0	1	1	1	18.7305	0	0	0	0	0	0	0	0	0	0	1	0	0	0	0.68	0.71	1.2	1.37	0.98	1.28	13	13	13	17	17	17	0.693878	-0.36546	0.739583	-0.301668	1.2	0.182322	1.38384	0.324861	1.02083	0.0206193	1.2549	0.227057
274963	24	39	1	1	1	1	19.0311	0	0	0	0	0	0	0	0	0	0	0	0	0	0	3.25	1.44	1.2	0.88	1.8	1.07	12	12	12	16	16	16	3.31633	1.19886	1.5	0.405465	1.2	0.182322	0.888889	-0.117783	1.81818	0.597837	1.05941	0.0577083
277310	27	39	1	1	1	0	18.662	0	0	1	1	0	0	0	0	0	0	0	0	0	0	1.09	3.07	0.9	1.12	4.14	1.19	13	13	13	17	17	17	1.11224	0.10638	3.19792	1.1625	0.9	-0.105361	1.13131	0.123379	4.3125	1.46152	1.16667	0.154151
282400	25	38	1	1	1	0	22.7615	0	0	0	0	0	0	0	0	0	0	0	0	1	0	1.06	0.84	0.7	2.03	2.34	1.21	13	13	13	17	17	17	1.08163	0.0784716	0.875	-0.133531	0.7	-0.356675	2.05051	0.718086	2.4375	0.890973	1.18627	0.170818
282976	33	40	0	1	0	1	24.9395	0	1	0	0	0	0	0	0	0	0	0	0	0	0	0.35	2.21	0.9	0.9	1.69	1.03	13	13	13	17	17	17	0.357143	-1.02962	2.30208	0.833815	0.9	-0.105361	0.909091	-0.0953102	1.76042	0.565551	1.0098	0.00975617
246071	29	38	1	1	1	0	19.2234	0	1	0	1	0	0	0	0	0	0	0	0	0	0	1.9	0.8	1.3	0.79	0.46	1.46	12	12	12	16	16	16	1.93878	0.662057	0.833333	-0.182322	1.3	0.262364	0.79798	-0.225672	0.464646	-0.766478	1.44554	0.368486
71910	36	38	1	0	0	0	23.4221	0	1	1	1	0	0	0	0	1	0	1	0	0	0	0.86	1.16	0.8	1.09	1.06	1.16	12	12	12	16	16	16	0.877551	-0.13062	1.20833	0.189242	0.8	-0.223144	1.10101	0.096228	1.07071	0.0683192	1.14851	0.13847
282167	28	39	0	1	1	1	16.6493	0	0	0	0	0	0	0	0	0	0	1	0	0	0	1.08	0.36	0.9	1.18	0.66	1.53	11	11	11	16	16	16	1.13684	0.128254	0.367347	-1.00145	0.9	-0.105361	1.19192	0.175565	0.666667	-0.405465	1.51485	0.415317
201571	34	39	0	1	1	1	22.4913	0	1	0	0	0	0	0	0	0	0	0	0	0	0	2.03	0.9	1.1	0.65	0.55	0.79	12	12	12	17	17	17	2.07143	0.728239	0.9375	-0.0645385	1.1	0.0953102	0.656566	-0.420733	0.572917	-0.557015	0.77451	-0.255525
243328	29	30	0	1	1	1	16.8242	0	1	0	0	1	1	1	0	1	0	0	0	0	0	0.49	1.04	1	1.44	1.08	1	12	12	12	16	16	16	0.5	-0.693147	1.08333	0.0800427	1	0	1.45455	0.374693	1.09091	0.0870114	0.990099	-0.00995033
286316	30	39	0	1	1	0	19.313	0	1	1	1	0	0	0	0	0	0	0	0	0	0	1.02	1.95	0.9	0.77	2.94	1.12	12	12	12	17	17	17	1.04082	0.0400053	2.03125	0.708651	0.9	-0.105361	0.777778	-0.251314	3.0625	1.11923	1.09804	0.0935261
286338	35	40	1	1	0	0	21.7278	0	1	0	1	0	0	0	0	1	0	0	0	0	0	0.95	1.95	1.1	2.08	1.11	1.22	14	14	14	18	18	18	0.904762	-0.100083	2.09677	0.7404	1.1	0.0953102	2.10101	0.742418	1.18085	0.166235	1.1619	0.150061
284765	22	41	1	1	1	1	23.2434	0	0	1	0	0	0	0	0	0	0	0	0	0	0	1.26	2.07	0.9	0.76	2.34	0.99	12	12	12	18	18	18	1.28571	0.251314	2.15625	0.768371	0.9	-0.105361	0.767677	-0.264387	2.48936	0.912026	0.942857	-0.0588405
286411	25	39	0	1	1	1	20.202	0	0	1	0	0	0	0	0	0	0	0	0	0	0	1.31	1.98	1.5	0.62	1.32	0.98	13	13	13	17	17	17	1.33673	0.29023	2.0625	0.723919	1.5	0.405465	0.626263	-0.467985	1.375	0.318454	0.960784	-0.0400053
99392	36	37	1	1	1	1	23.7332	0	0	0	0	0	0	0	1	0	0	1	0	0	0	3.34	0.52	0.8	1.03	0.85	0.88	12	12	12	16	16	16	3.40816	1.22617	0.541667	-0.613104	0.8	-0.223144	1.0404	0.0396091	0.858586	-0.152469	0.871287	-0.137784
238294	27	39	1	1	1	1	21.7993	0	1	0	0	0	0	0	0	0	0	0	0	0	0	1.18	1	0.9	1.2	1.71	0.93	12	12	12	16	16	16	1.20408	0.185717	1.04167	0.040822	0.9	-0.105361	1.21212	0.192372	1.72727	0.546544	0.920792	-0.082521
286793	29	39	0	1	0	1	22.0317	0	0	0	1	0	0	0	0	0	0	1	0	0	0	0.51	0.23	1.1	0.99	0.4	1.02	13	13	13	17	17	17	0.520408	-0.653142	0.239583	-1.42885	1.1	0.0953102	1	0	0.416667	-0.875469	1	0
246791	32	39	0	1	1	1	21.0938	0	1	0	0	0	0	0	0	1	0	0	0	0	0	0.64	0.29	1.1	0.8	0.27	1.37	11	11	11	16	16	16	0.673684	-0.394994	0.295918	-1.21767	1.1	0.0953102	0.808081	-0.213093	0.272727	-1.29928	1.35644	0.30486
283105	26	40	0	1	1	1	19.2234	0	0	1	0	0	0	0	0	0	0	0	0	0	0	1.11	0.96	1.2	1.34	1.06	1.16	13	13	13	16	16	16	1.13265	0.124563	1	0	1.2	0.182322	1.35354	0.30272	1.07071	0.0683192	1.14851	0.13847
282350	29	39	0	1	1	1	17.9418	0	0	0	0	0	0	0	0	0	0	0	0	0	0	0.9	1.17	0.8	0.62	0.62	1.37	13	13	13	17	17	17	0.918367	-0.0851578	1.21875	0.197826	0.8	-0.223144	0.626263	-0.467985	0.645833	-0.437214	1.34314	0.295008
284320	20	41	0	1	1	1	18.8189	0	0	0	0	0	0	0	0	0	0	0	0	0	0	0.96	1.19	0.8	1.06	1.32	1.44	12	12	12	17	17	17	0.979592	-0.0206193	1.23958	0.214775	0.8	-0.223144	1.07071	0.0683192	1.375	0.318454	1.41176	0.34484
284343	24	38	0	1	1	1	19.313	0	0	0	0	0	0	0	0	0	0	0	0	0	0	2.05	0.7	0.9	0.52	0.65	1.12	13	13	13	17	17	17	2.09184	0.738043	0.729167	-0.315853	0.9	-0.105361	0.525253	-0.643876	0.677083	-0.389961	1.09804	0.0935261
284391	30	39	1	1	1	1	18.6667	0	1	0	1	0	0	0	0	1	0	0	0	0	0	0.95	0.21	0.9	0.87	0.19	0.82	12	12	12	17	17	17	0.969388	-0.0310906	0.21875	-1.51983	0.9	-0.105361	0.878788	-0.129212	0.197917	-1.61991	0.803922	-0.218254
166820	31	41	0	1	1	1	16.1843	0	1	0	1	0	0	0	0	0	0	0	0	0	0	0.83	1.51	0.9	0.99	1.47	1.31	12	12	12	17	17	17	0.846939	-0.166127	1.57292	0.452932	0.9	-0.105361	1	0	1.53125	0.426084	1.28431	0.250225
183710	29	38	1	1	1	1	21.2183	0	1	1	1	0	0	0	0	0	0	0	0	0	0	2.17	0.75	1.3	1.22	0.99	1.05	12	12	12	17	17	17	2.21429	0.79493	0.78125	-0.24686	1.3	0.262364	1.23232	0.208901	1.03125	0.0307717	1.02941	0.0289875
215222	30	41	0	1	1	1	23.3091	0	1	1	0	0	0	0	0	0	0	0	0	0	0	1.95	1.48	0.9	0.76	1.45	1.33	13	13	13	16	16	16	1.9898	0.688032	1.54167	0.432864	0.9	-0.105361	0.767677	-0.264387	1.46465	0.381614	1.31683	0.275229
282506	24	40	1	1	1	1	15.9675	0	0	0	0	0	0	0	0	0	0	0	0	0	0	0.91	4.33	0.9	0.81	3.53	1.58	12	12	12	17	17	17	0.928571	-0.074108	4.51042	1.50639	0.9	-0.105361	0.818182	-0.200671	3.67708	1.30212	1.54902	0.437622
282512	28	38	1	1	0	1	21.0303	0	1	0	0	0	0	0	0	1	0	0	0	0	0	0.75	0.59	1.3	1.65	2.72	0.37	13	13	13	17	17	17	0.765306	-0.267479	0.614583	-0.486811	1.3	0.262364	1.66667	0.510826	2.83333	1.04145	0.362745	-1.01405
282515	29	38	0	1	1	1	16.284	0	0	0	1	0	0	0	0	0	0	0	0	0	0	1.5	1.3	0.9	0.8	1.12	1.03	12	12	12	18	18	18	1.53061	0.425668	1.35417	0.303186	0.9	-0.105361	0.808081	-0.213093	1.19149	0.175204	0.980952	-0.0192314
248753	29	40	0	1	0	0	23.9334	0	1	0	0	0	0	0	0	0	0	0	0	0	0	0.76	0.67	0.9	0.45	0.46	0.78	12	12	12	16	16	16	0.77551	-0.254234	0.697917	-0.359656	0.9	-0.105361	0.454545	-0.788457	0.464646	-0.766478	0.772277	-0.258412
177932	27	38	1	1	0	0	23.5883	0	1	1	1	0	0	0	0	0	0	2	0	0	0	0.27	0.48	1.2	0.74	0.6	1.26	13	13	13	19	19	19	0.27551	-1.28913	0.5	-0.693147	1.2	0.182322	0.747475	-0.291055	0.612245	-0.490623	1.21154	0.191891
282572	26	41	0	1	1	1	19.9594	0	0	0	0	0	0	0	0	0	0	0	0	0	0	2.21	0.96	0.7	0.96	1.22	1.11	13	13	13	17	17	17	2.2551	0.813195	1	0	0.7	-0.356675	0.969697	-0.0307717	1.27083	0.239673	1.08824	0.0845574
283117	28	40	0	1	1	1	20.9366	0	0	0	1	0	0	0	0	0	0	0	0	0	0	0.71	0.89	0.8	0.95	0.96	1.03	12	12	12	16	16	16	0.72449	-0.322288	0.927083	-0.0757118	0.8	-0.223144	0.959596	-0.041243	0.969697	-0.0307717	1.0198	0.0196085
283132	26	41	0	1	1	1	19.5196	1	0	1	1	0	0	0	0	0	0	0	0	0	0	0.55	0.37	0.8	1.47	0.4	1.23	12	12	12	16	16	16	0.561224	-0.577634	0.385417	-0.95343	0.8	-0.223144	1.48485	0.395313	0.40404	-0.90624	1.21782	0.197064
283139	22	40	1	1	1	1	18.902	0	0	1	1	0	0	0	0	0	0	0	0	0	0	0.38	4.98	0.6	0.69	6.75	0.96	12	12	12	16	16	16	0.387755	-0.947381	5.1875	1.64625	0.6	-0.510826	0.69697	-0.361013	6.81818	1.91959	0.950495	-0.0507723
283145	30	40	0	1	0	1	19.052	0	0	0	0	0	0	0	1	0	0	0	0	0	0	1.76	0.66	0.8	0.93	0.6	1.57	12	12	12	16	16	16	1.79592	0.585517	0.6875	-0.374693	0.8	-0.223144	0.939394	-0.0625204	0.606061	-0.500775	1.55446	0.441125
283164	28	38	0	1	1	0	17.2584	0	0	0	1	0	0	0	0	0	0	0	0	0	0	0.85	0.68	0.8	1.56	0.9	1.2	13	13	13	16	16	16	0.867347	-0.142316	0.708333	-0.34484	0.8	-0.223144	1.57576	0.454736	0.909091	-0.0953102	1.18812	0.172371
284842	32	39	0	1	0	1	23.5847	0	1	0	0	0	0	0	0	0	0	1	0	0	0	1.25	2.38	0.9	0.57	1.69	1.14	12	12	12	16	16	16	1.27551	0.243346	2.47917	0.907922	0.9	-0.105361	0.575758	-0.552069	1.70707	0.534779	1.12871	0.121078
208293	30	39	1	1	1	1	25.2272	0	1	0	0	0	0	0	0	0	0	0	0	0	0	0.92	1.27	1	0.75	0.71	1.26	12	12	12	17	17	17	0.938776	-0.0631789	1.32292	0.279839	1	0	0.757576	-0.277632	0.739583	-0.301668	1.23529	0.211309
285751	33	39	0	1	0	0	17.782	1	0	1	0	0	0	0	0	0	0	0	0	0	0	1.24	0.86	1.1	1.45	0.3	0.81	12	12	12	17	17	17	1.26531	0.235314	0.895833	-0.110001	1.1	0.0953102	1.46465	0.381614	0.3125	-1.16315	0.794118	-0.230524
285759	28	39	1	1	1	1	22.8329	0	1	1	1	0	0	0	0	0	0	0	0	0	0	0.81	0.55	1.1	0.71	0.5	0.93	14	14	14	18	18	18	0.771429	-0.259511	0.591398	-0.525266	1.1	0.0953102	0.717172	-0.33244	0.531915	-0.631272	0.885714	-0.121361
285815	26	37	0	1	1	0	17.5113	0	0	0	0	0	0	0	0	0	0	0	0	0	0	0.95	1.46	0.8	1.73	1.12	1.6	13	13	13	17	17	17	0.969388	-0.0310906	1.52083	0.419258	0.8	-0.223144	1.74747	0.558172	1.16667	0.154151	1.56863	0.450201
283635	26	39	0	1	0	0	20.9218	0	1	0	1	0	0	0	0	1	0	0	0	0	0	1.82	2	0.8	0.96	1.04	1.12	13	13	13	19	19	19	1.85714	0.619039	2.08333	0.733969	0.8	-0.223144	0.969697	-0.0307717	1.06122	0.0594234	1.07692	0.074108
283639	24	38	1	1	0	0	18.9849	0	0	1	0	0	0	0	0	0	0	0	0	0	0	0.81	0.91	1.1	0.7	1.5	1.07	13	13	13	18	18	18	0.826531	-0.190518	0.947917	-0.0534887	1.1	0.0953102	0.707071	-0.346625	1.59574	0.467341	1.01905	0.0188685
283731	28	40	0	1	1	1	21.2279	0	1	1	0	0	0	0	0	1	0	0	0	0	0	0.93	0.56	0.6	0.94	0.38	1.16	13	13	13	17	17	17	0.94898	-0.052368	0.583333	-0.538997	0.6	-0.510826	0.949495	-0.0518251	0.395833	-0.926762	1.13725	0.128617
278855	24	39	0	1	1	1	17.1875	0	0	0	1	0	0	0	0	0	0	0	0	0	0	2.31	2.96	1.6	0.9	2.44	1.68	13	13	13	17	17	17	2.35714	0.85745	3.08333	1.12601	1.6	0.470004	0.909091	-0.0953102	2.54167	0.93282	1.64706	0.498991
282870	31	40	1	1	1	1	20.5457	0	0	0	0	0	0	0	0	0	0	0	0	0	0	1.17	0.63	1	1.49	1.02	1.16	12	12	12	16	16	16	1.19388	0.177206	0.65625	-0.421213	1	0	1.50505	0.408826	1.0303	0.029853	1.14851	0.13847
282995	24	39	1	1	1	1	17.0134	0	0	1	1	0	0	0	0	0	0	0	0	0	0	1.28	1.61	0.9	1.14	1.1	1.45	12	12	12	17	17	17	1.30612	0.267063	1.67708	0.517056	0.9	-0.105361	1.15152	0.141079	1.14583	0.136132	1.42157	0.351761
285104	28	39	1	1	0	0	16.4062	0	1	1	1	0	0	0	0	1	0	1	0	0	0	0.98	0.83	1.1	0.5	0.42	1.37	13	13	13	17	17	17	1	0	0.864583	-0.145508	1.1	0.0953102	0.505051	-0.683097	0.4375	-0.826679	1.34314	0.295008
282614	30	38	1	1	0	0	23.573	0	1	0	1	0	0	0	0	0	0	0	0	0	0	1.13	1.39	1.1	0.78	0.91	1.62	12	12	12	17	17	17	1.15306	0.14242	1.44792	0.370126	1.1	0.0953102	0.787879	-0.238411	0.947917	-0.0534887	1.58824	0.462624
282627	32	38	1	1	1	1	25.6209	0	0	0	0	0	0	0	0	0	0	1	0	0	0	0.73	0.71	1.2	0.85	0.76	1.13	12	12	12	17	17	17	0.744898	-0.294508	0.739583	-0.301668	1.2	0.182322	0.858586	-0.152469	0.791667	-0.233615	1.10784	0.102415
284227	26	40	1	1	1	1	18.902	0	0	1	0	0	0	0	0	0	0	0	0	1	0	2.07	0.81	1	1.01	0.63	1.34	13	13	13	17	17	17	2.11224	0.747751	0.84375	-0.169899	1	0	1.0202	0.0200007	0.65625	-0.421213	1.31373	0.272867
284244	37	39	1	1	1	0	20.9566	0	1	0	0	0	0	0	0	1	0	1	0	0	0	1.28	0.6	1.1	1.19	0.94	1	13	13	13	17	17	17	1.30612	0.267063	0.625	-0.470004	1.1	0.0953102	1.20202	0.184004	0.979167	-0.0210534	0.980392	-0.0198026
284275	28	38	1	1	1	1	23.7118	0	0	0	0	0	0	0	0	0	0	1	0	0	0	1.44	0.96	1.3	0.97	0.78	1.27	14	14	14	18	18	18	1.37143	0.315853	1.03226	0.0317487	1.3	0.262364	0.979798	-0.0204089	0.829787	-0.186586	1.20952	0.190227
284277	26	38	0	1	1	0	23.7253	0	0	0	0	0	0	0	0	0	0	0	0	0	0	0.41	1.44	1.1	0.72	0.79	1.21	12	12	12	16	16	16	0.418367	-0.871395	1.5	0.405465	1.1	0.0953102	0.727273	-0.318454	0.79798	-0.225672	1.19802	0.18067
284285	28	40	1	0	1	1	23.2335	0	1	1	1	0	0	0	0	1	0	0	0	0	0	1.04	0.61	1	1.11	0.88	1.09	14	14	14	17	17	17	0.990476	-0.00956945	0.655914	-0.421726	1	0	1.12121	0.11441	0.916667	-0.0870114	1.06863	0.0663751
256404	26	38	0	1	1	1	22.4724	0	1	1	1	0	0	0	0	0	0	0	0	0	0	1.13	1.38	0.8	1.84	1.11	1.51	12	12	12	16	16	16	1.15306	0.14242	1.4375	0.362905	0.8	-0.223144	1.85859	0.619816	1.12121	0.11441	1.49505	0.402159
284933	31	40	1	1	0	1	24.7143	0	0	0	0	0	0	0	0	0	0	0	0	0	0	0.35	1.53	0.9	0.75	1.61	1.14	13	13	13	18	18	18	0.357143	-1.02962	1.59375	0.46609	0.9	-0.105361	0.757576	-0.277632	1.71277	0.53811	1.08571	0.0822381
285138	23	37	1	1	1	1	24.3141	0	0	0	1	0	0	0	0	0	0	0	0	0	0	0.85	0.45	0.8	0.87	0.79	1.42	13	13	13	16	16	16	0.867347	-0.142316	0.46875	-0.757686	0.8	-0.223144	0.878788	-0.129212	0.79798	-0.225672	1.40594	0.340707
285153	22	39	1	1	0	0	19.7777	0	0	1	1	0	0	0	0	0	0	0	0	1	0	1.16	3.58	0.8	1.14	3.46	1.29	13	13	13	17	17	17	1.18367	0.168623	3.72917	1.31618	0.8	-0.223144	1.15152	0.141079	3.60417	1.28209	1.26471	0.23484
285166	29	39	0	1	1	1	19.1894	0	0	0	0	0	0	0	0	0	0	0	0	0	0	1.13	1.05	0.9	1.57	0.74	1.75	13	13	13	17	17	17	1.15306	0.14242	1.09375	0.0896122	0.9	-0.105361	1.58586	0.461126	0.770833	-0.260283	1.71569	0.539813
283750	32	39	1	1	1	1	19.7036	0	0	1	1	0	0	0	1	0	0	0	0	0	0	2.3	0.81	0.9	1.06	0.78	1.22	11	11	11	15	15	15	2.42105	0.884202	0.826531	-0.190518	0.9	-0.105361	1.06	0.0582689	0.75	-0.287682	1.2449	0.219054
226490	30	39	1	1	1	0	19.7055	0	1	0	0	0	0	0	0	0	0	1	0	0	0	0.86	0.91	1	0.98	0.61	1.26	13	13	13	16	16	16	0.877551	-0.13062	0.947917	-0.0534887	1	0	0.989899	-0.0101524	0.616162	-0.484246	1.24752	0.221161
282387	28	39	1	1	1	0	18.5437	0	0	0	0	0	0	0	0	0	0	0	0	0	0	1.38	0.72	1	0.59	0.6	1.33	12	12	12	16	16	16	1.40816	0.342286	0.75	-0.287682	1	0	0.59596	-0.517582	0.606061	-0.500775	1.31683	0.275229
282467	31	39	0	1	1	0	32.0461	0	0	0	0	0	0	0	0	0	0	2	0	0	0	2	0.87	1.4	0.73	1.17	0.83	12	12	12	16	16	16	2.04082	0.71335	0.90625	-0.0984401	1.4	0.336472	0.737374	-0.30466	1.18182	0.167054	0.821782	-0.19628
241375	32	39	1	1	1	1	18.5178	0	1	0	0	0	0	0	0	0	0	0	0	0	0	0.68	0.97	1.1	0.76	1.08	0.96	12	12	12	16	16	16	0.693878	-0.36546	1.01042	0.0103628	1.1	0.0953102	0.767677	-0.264387	1.09091	0.0870114	0.950495	-0.0507723
286159	30	41	0	1	1	0	22.3478	0	0	0	1	0	0	0	0	0	0	0	0	0	0	1.05	0.66	1.1	0.76	0.72	1.22	12	12	12	16	16	16	1.07143	0.0689929	0.6875	-0.374693	1.1	0.0953102	0.767677	-0.264387	0.727273	-0.318454	1.20792	0.188901
114858	35	41	0	1	1	0	17.1875	0	1	1	0	0	0	0	0	0	0	0	0	0	0	0.61	1.11	1	0.7	0.75	1.16	12	12	12	16	16	16	0.622449	-0.474094	1.15625	0.145182	1	0	0.707071	-0.346625	0.757576	-0.277632	1.14851	0.13847
282651	38	40	0	0	0	1	19.313	0	0	1	1	0	0	0	0	0	0	0	0	0	0	1.63	1.04	1.1	0.84	0.6	1.42	12	12	12	17	17	17	1.66327	0.508783	1.08333	0.0800427	1.1	0.0953102	0.848485	-0.164303	0.625	-0.470004	1.39216	0.330854
282655	39	39	0	1	0	1	25.2363	0	1	1	1	0	0	0	1	0	0	1	0	0	0	1.07	0.77	1.1	1.1	0.72	2.02	12	12	12	17	17	17	1.09184	0.0878614	0.802083	-0.220543	1.1	0.0953102	1.11111	0.105361	0.75	-0.287682	1.98039	0.683295
282666	23	38	1	1	0	1	19.9481	0	0	0	0	0	0	0	0	0	0	0	0	0	0	2.63	0.4	1.1	1.63	0.67	1.11	13	13	13	17	17	17	2.68367	0.987187	0.416667	-0.875469	1.1	0.0953102	1.64646	0.49863	0.697917	-0.359656	1.08824	0.0845574
284179	26	41	0	1	1	0	20.5442	0	0	1	1	0	0	0	0	0	0	0	0	1	0	1.86	0.92	0.8	0.85	0.85	1.77	13	13	13	17	17	17	1.89796	0.640779	0.958333	-0.0425596	0.8	-0.223144	0.858586	-0.152469	0.885417	-0.121697	1.73529	0.551177
284203	29	39	0	1	0	1	20.2848	0	0	0	0	0	0	0	0	0	0	0	0	0	0	0.63	0.28	1.3	0.64	0.48	1.28	13	13	13	18	18	18	0.642857	-0.441833	0.291667	-1.23214	1.3	0.262364	0.646465	-0.436237	0.510638	-0.672094	1.21905	0.19807
174674	32	40	0	1	1	1	17.1468	0	1	0	0	0	0	0	0	0	0	0	0	0	0	0.4	0.94	0.7	0.97	1.03	1.11	12	12	12	17	17	17	0.408163	-0.896088	0.979167	-0.0210534	0.7	-0.356675	0.979798	-0.0204089	1.07292	0.0703808	1.08824	0.0845574
283861	26	40	0	1	1	1	17.6898	0	0	0	1	0	0	0	0	0	0	0	0	0	0	1.05	0.85	1	1.08	0.82	1.11	13	13	13	16	16	16	1.07143	0.0689929	0.885417	-0.121697	1	0	1.09091	0.0870114	0.828283	-0.188401	1.09901	0.0944097
284301	36	39	1	1	1	1	20.5693	0	1	0	0	0	0	0	0	0	0	0	0	0	0	3.02	0.84	1.2	0.54	0.39	1.16	12	12	12	16	16	16	3.08163	1.12546	0.875	-0.133531	1.2	0.182322	0.545455	-0.606136	0.393939	-0.931558	1.14851	0.13847
284351	26	39	0	1	0	1	20.2395	0	0	0	0	0	0	0	0	0	0	0	0	0	0	0.53	0.7	0.9	0.98	1.05	1.48	12	12	12	16	16	16	0.540816	-0.614676	0.729167	-0.315853	0.9	-0.105361	0.989899	-0.0101524	1.06061	0.0588405	1.46535	0.382092
283570	33	40	1	1	0	0	25.4524	0	0	0	0	0	0	0	1	0	0	0	0	0	0	0.6	0.56	0.8	2.2	1.15	1.34	12	12	12	16	16	16	0.612245	-0.490623	0.583333	-0.538997	0.8	-0.223144	2.22222	0.798508	1.16162	0.149812	1.32673	0.282719
283619	29	40	1	1	1	1	21.875	0	0	0	0	0	0	0	0	0	0	0	0	0	0	0.46	2.09	0.8	0.43	2.92	0.88	12	12	12	16	16	16	0.469388	-0.756326	2.17708	0.777986	0.8	-0.223144	0.434343	-0.83392	2.94949	1.08163	0.871287	-0.137784
283670	25	37	1	1	0	1	22.7896	0	0	0	0	0	0	0	0	0	0	1	0	0	0	1.42	0.6	0.7	0.97	0.62	1.34	13	13	13	17	17	17	1.44898	0.37086	0.625	-0.470004	0.7	-0.356675	0.979798	-0.0204089	0.645833	-0.437214	1.31373	0.272867
282830	22	40	0	1	0	0	25.6312	0	0	0	1	0	0	0	0	0	0	0	0	1	0	0.89	0.4	1	1.41	0.82	1.37	14	14	14	20	20	20	0.847619	-0.165324	0.430108	-0.84372	1	0	1.39604	0.333639	0.891304	-0.115069	1.28037	0.247152
283688	26	37	0	0	0	0	19.0443	0	0	0	0	0	0	0	0	0	0	1	0	0	0	1.18	0.75	1	0.86	0.73	1.25	12	12	12	16	16	16	1.20408	0.185717	0.78125	-0.24686	1	0	0.868687	-0.140773	0.737374	-0.30466	1.23762	0.213193
181566	27	37	0	1	0	1	22.4609	0	1	0	0	0	0	0	0	0	0	0	0	0	0	0.66	1.02	1.2	0.92	1.2	1.06	13	13	13	19	19	19	0.673469	-0.395313	1.0625	0.0606246	1.2	0.182322	0.929293	-0.0733313	1.22449	0.202524	1.01923	0.0190482
238874	30	38	0	1	1	1	20.8163	0	1	0	0	0	0	0	0	0	0	0	0	0	0	0.75	0.75	1.1	0.88	0.5	1.41	13	13	13	17	17	17	0.765306	-0.267479	0.78125	-0.24686	1.1	0.0953102	0.888889	-0.117783	0.520833	-0.652325	1.38235	0.323787
283627	28	39	0	1	1	0	20.898	0	0	0	0	0	0	0	0	0	0	0	0	0	0	1.84	1.7	1.3	0.65	1.78	0.68	12	12	12	17	17	17	1.87755	0.629968	1.77083	0.57145	1.3	0.262364	0.656566	-0.420733	1.85417	0.617435	0.666667	-0.405465
283643	27	39	1	1	1	1	17.4649	0	0	1	1	0	0	0	0	0	0	0	0	0	0	0.77	2.8	0.8	0.75	3.61	0.65	11	11	11	15	15	15	0.810526	-0.210071	2.85714	1.04982	0.8	-0.223144	0.75	-0.287682	3.47115	1.24449	0.663265	-0.41058
222836	35	40	0	1	1	1	24.0234	0	1	0	0	0	0	0	0	0	0	0	0	0	0	1.48	1.52	1.2	1.04	1.16	1.28	12	12	12	16	16	16	1.5102	0.412245	1.58333	0.459532	1.2	0.182322	1.05051	0.049271	1.17172	0.15847	1.26733	0.23691
216332	30	40	1	1	1	1	23.1006	0	1	0	0	0	0	0	0	0	0	0	0	0	0	1.13	0.9	0.8	0.86	0.96	0.9	14	14	14	19	19	19	1.07619	0.0734275	0.967742	-0.0327898	0.8	-0.223144	0.868687	-0.140773	0.979592	-0.0206193	0.865385	-0.144581
282878	33	39	1	1	1	1	18.6374	0	1	0	0	0	0	0	0	1	0	0	0	0	0	1.22	1.28	1.2	1.07	1.04	0.99	12	12	12	16	16	16	1.2449	0.219054	1.33333	0.287682	1.2	0.182322	1.08081	0.077709	1.05051	0.049271	0.980198	-0.0200007
150776	34	38	0	1	1	1	20.0288	0	1	1	0	0	0	0	0	1	0	0	0	0	0	0.61	0.99	0.8	0.55	0.52	0.94	12	12	12	16	16	16	0.622449	-0.474094	1.03125	0.0307717	0.8	-0.223144	0.555556	-0.587787	0.525253	-0.643876	0.930693	-0.0718257
275759	31	40	0	1	1	1	24.6154	0	1	0	0	0	0	0	0	0	0	0	0	0	0	1.1	3.02	0.9	0.79	2.65	1.13	13	13	13	18	18	18	1.12245	0.115513	3.14583	1.14608	0.9	-0.105361	0.79798	-0.225672	2.81915	1.03644	1.07619	0.0734275
275819	25	37	0	1	1	1	20.3125	0	0	0	0	0	0	0	0	0	0	1	0	0	0	1.25	0.5	1.1	1.12	0.79	1.5	14	14	14	18	18	18	1.19048	0.174353	0.537634	-0.620576	1.1	0.0953102	1.13131	0.123379	0.840426	-0.173847	1.42857	0.356675
275763	31	40	0	1	0	1	24.3418	0	0	1	1	0	0	0	0	0	0	0	0	0	0	0.36	0.78	1.2	0.99	0.62	1.4	13	13	13	17	17	17	0.367347	-1.00145	0.8125	-0.207639	1.2	0.182322	1	0	0.645833	-0.437214	1.37255	0.31667
275804	29	35	1	1	1	1	20.7967	0	0	0	1	1	0	1	0	0	0	0	0	0	0	0.36	0.83	1	1.76	1.26	1.17	12	12	12	16	16	16	0.367347	-1.00145	0.864583	-0.145508	1	0	1.77778	0.575364	1.27273	0.241162	1.15842	0.147053
275828	27	39	1	1	1	1	23.7387	0	0	0	0	0	0	0	0	0	0	1	0	0	0	0.75	1.14	0.9	1.21	1.24	1.17	13	13	13	18	18	18	0.765306	-0.267479	1.1875	0.17185	0.9	-0.105361	1.22222	0.200671	1.31915	0.276987	1.11429	0.108214
123720	34	37	1	1	1	1	21.0938	0	1	1	0	0	0	0	0	0	0	0	0	0	0	1.03	0.88	1.1	1.33	0.81	1.14	12	12	12	16	16	16	1.05102	0.0497615	0.916667	-0.0870114	1.1	0.0953102	1.34343	0.295229	0.818182	-0.200671	1.12871	0.121078
276630	37	40	1	1	0	1	19.2277	0	1	0	1	0	0	0	0	0	0	0	0	0	0	0.83	1.03	0.8	0.79	1.74	0.97	13	13	13	17	17	17	0.846939	-0.166127	1.07292	0.0703808	0.8	-0.223144	0.79798	-0.225672	1.8125	0.594707	0.95098	-0.0502618
276655	25	40	1	1	0	0	22.3081	0	1	0	1	0	0	0	0	0	0	0	0	0	0	0.51	1.33	1	1.23	1.99	1.55	12	12	12	16	16	16	0.520408	-0.653142	1.38542	0.326001	1	0	1.24242	0.217065	2.0101	0.698185	1.53465	0.428305
277473	25	38	1	1	1	1	17.782	0	0	0	0	0	0	0	0	0	0	0	0	0	0	0.76	0.77	1.2	1	0.97	2.04	13	13	13	17	17	17	0.77551	-0.254234	0.802083	-0.220543	1.2	0.182322	1.0101	0.0100503	1.01042	0.0103628	2	0.693147
277477	23	39	1	1	0	0	28.257	0	1	0	0	0	0	0	0	0	0	1	0	0	0	1.21	0.96	1	0.71	0.66	0.95	12	12	12	16	16	16	1.23469	0.210823	1	0	1	0	0.717172	-0.33244	0.666667	-0.405465	0.940594	-0.0612436
277506	21	40	1	1	0	0	21.6441	0	0	0	0	0	0	0	0	0	0	1	0	0	0	3.35	0.92	0.9	1.42	1.02	1.08	12	12	12	18	18	18	3.41837	1.22916	0.958333	-0.0425596	0.9	-0.105361	1.43434	0.360707	1.08511	0.081678	1.02857	0.0281709
275947	37	39	1	1	1	1	21.0962	0	1	1	1	0	0	0	0	0	0	1	0	0	0	1.23	0.79	1.3	0.99	0.92	1.03	12	12	12	16	16	16	1.2551	0.227217	0.822917	-0.1949	1.3	0.262364	1	0	0.929293	-0.0733313	1.0198	0.0196085
140996	31	40	0	1	1	1	18.8672	0	0	0	0	0	0	0	0	0	0	0	0	0	0	1.69	1.46	1	1.08	1.57	1.02	13	13	13	17	17	17	1.72449	0.544931	1.52083	0.419258	1	0	1.09091	0.0870114	1.63542	0.491898	1	0
127694	29	37	1	1	1	1	20.2291	0	1	0	0	0	0	0	0	0	0	0	0	0	0	1.18	0.93	1.4	1.4	0.43	0.79	13	13	13	17	17	17	1.20408	0.185717	0.96875	-0.0317487	1.4	0.336472	1.41414	0.346523	0.447917	-0.803148	0.77451	-0.255525
276709	28	39	1	1	1	1	25.3906	0	0	1	1	0	0	0	0	0	0	0	0	0	0	2.31	1.28	0.7	1.41	1.59	0.8	12	12	12	16	16	16	2.35714	0.85745	1.33333	0.287682	0.7	-0.356675	1.42424	0.35364	1.60606	0.473784	0.792079	-0.233094
229249	31	40	1	1	1	1	25.3902	0	1	1	1	0	0	0	0	0	0	0	0	0	0	0.51	0.75	0.7	1.12	0.3	1.59	14	14	14	18	18	18	0.485714	-0.722135	0.806452	-0.215111	0.7	-0.356675	1.13131	0.123379	0.319149	-1.1421	1.51429	0.414944
277429	34	38	0	1	1	1	19.9219	0	1	0	0	0	0	0	0	1	0	0	0	0	0	1.6	0.91	1	0.99	0.58	1.32	12	12	12	16	16	16	1.63265	0.490206	0.947917	-0.0534887	1	0	1	0	0.585859	-0.534677	1.30693	0.267681
194519	29	38	1	0	1	1	19.9336	0	1	0	0	0	0	0	0	0	0	0	0	0	0	0.49	0.35	1.2	0.84	0.28	1.28	13	13	13	17	17	17	0.5	-0.693147	0.364583	-1.009	1.2	0.182322	0.848485	-0.164303	0.291667	-1.23214	1.2549	0.227057
191256	29	39	0	1	1	1	20.4294	0	1	0	0	0	0	0	0	1	0	0	0	0	0	1.85	2.21	1.1	1.06	0.97	1.49	12	12	12	16	16	16	1.88776	0.635388	2.30208	0.833815	1.1	0.0953102	1.07071	0.0683192	0.979798	-0.0204089	1.47525	0.388826
120322	34	39	0	1	1	1	22.291	0	1	1	1	0	0	0	0	0	0	0	0	0	0	0.76	1.78	1.1	0.71	1.29	1.23	12	12	12	17	17	17	0.77551	-0.254234	1.85417	0.617435	1.1	0.0953102	0.717172	-0.33244	1.34375	0.295464	1.20588	0.187212
276566	29	39	0	1	1	1	19.35	0	0	0	1	0	0	0	0	0	0	0	0	0	0	1.43	0.31	0.8	0.62	0.35	0.99	11	11	11	16	16	16	1.50526	0.408968	0.316327	-1.15098	0.8	-0.223144	0.626263	-0.467985	0.353535	-1.03977	0.980198	-0.0200007
180981	31	38	0	1	0	1	18.9866	0	1	0	1	0	0	0	0	0	0	0	0	1	0	0.51	0.9	1.1	0.51	0.56	0.69	13	13	13	17	17	17	0.520408	-0.653142	0.9375	-0.0645385	1.1	0.0953102	0.515152	-0.663294	0.583333	-0.538997	0.676471	-0.390866
277224	29	41	1	1	0	1	20.7033	0	0	0	0	0	0	0	0	0	0	0	0	0	0	0.52	0.92	1.3	1.27	0.87	1.5	13	13	13	17	17	17	0.530612	-0.633724	0.958333	-0.0425596	1.3	0.262364	1.28283	0.249067	0.90625	-0.0984401	1.47059	0.385662
130799	30	39	0	1	1	1	23.0112	0	1	0	0	0	0	0	0	1	0	0	0	0	0	0.3	0.66	1.1	2.04	1.17	0.81	12	12	12	16	16	16	0.306122	-1.18377	0.6875	-0.374693	1.1	0.0953102	2.06061	0.723	1.18182	0.167054	0.80198	-0.220671
214735	30	38	0	1	1	1	23.7118	0	1	0	0	0	0	0	0	0	0	0	0	0	0	0.44	0.57	0.8	1.19	0.48	1.07	13	13	13	17	17	17	0.44898	-0.800778	0.59375	-0.521297	0.8	-0.223144	1.20202	0.184004	0.5	-0.693147	1.04902	0.047856
277524	32	39	0	1	0	0	23.4952	0	1	0	1	0	0	0	1	0	0	0	0	0	0	0.95	2.05	0.7	1.26	1.95	1.28	12	12	12	16	16	16	0.969388	-0.0310906	2.13542	0.758662	0.7	-0.356675	1.27273	0.241162	1.9697	0.67788	1.26733	0.23691
163794	29	30	0	1	1	1	18.026	0	1	0	0	1	1	1	0	1	0	0	0	0	0	1.52	0.76	1.3	0.8	0.3	1.3	12	12	12	17	17	17	1.55102	0.438913	0.791667	-0.233615	1.3	0.262364	0.808081	-0.213093	0.3125	-1.16315	1.27451	0.242562
276459	33	39	0	1	1	1	16.7969	0	1	1	0	0	0	0	0	0	0	0	0	0	0	1.97	2.42	0.6	1.46	1.74	0.98	12	12	12	16	16	16	2.0102	0.698236	2.52083	0.92459	0.6	-0.510826	1.47475	0.388487	1.75758	0.563935	0.970297	-0.030153
139553	30	40	0	1	1	0	18.8468	0	1	0	0	0	0	0	0	0	0	0	0	0	0	1.13	0.73	1.1	0.82	0.71	1	12	12	12	17	17	17	1.15306	0.14242	0.760417	-0.273889	1.1	0.0953102	0.828283	-0.188401	0.739583	-0.301668	0.980392	-0.0198026
186921	33	38	1	1	1	1	18.4265	0	1	0	0	0	0	0	0	0	0	0	0	0	0	0.54	0.86	1.1	0.82	0.77	0.76	12	12	12	16	16	16	0.55102	-0.595983	0.895833	-0.110001	1.1	0.0953102	0.828283	-0.188401	0.777778	-0.251314	0.752475	-0.284387
276780	33	39	0	1	1	1	17.6254	0	1	0	0	0	0	0	0	1	0	0	0	0	0	3.28	1.98	0.8	1.43	1.32	0.66	11	11	11	16	16	16	3.45263	1.23914	2.02041	0.7033	0.8	-0.223144	1.44444	0.367725	1.33333	0.287682	0.653465	-0.425466
228501	34	40	0	1	1	1	22.4913	0	1	0	0	0	0	0	0	0	0	0	0	0	0	1.35	1.27	1	0.63	0.89	1.15	13	13	13	17	17	17	1.37755	0.320307	1.32292	0.279839	1	0	0.636364	-0.451985	0.927083	-0.0757118	1.12745	0.119959
146489	30	38	1	1	1	1	23.8624	0	1	1	0	0	0	0	0	1	0	0	0	0	0	0.98	1.44	1.3	0.59	0.78	1.13	13	13	13	17	17	17	1	0	1.5	0.405465	1.3	0.262364	0.59596	-0.517582	0.8125	-0.207639	1.10784	0.102415
277122	30	39	0	1	1	1	21.4844	0	0	0	0	0	0	0	0	0	0	0	0	0	0	0.64	0.6	0.7	0.76	0.44	0.72	12	12	12	16	16	16	0.653061	-0.426084	0.625	-0.470004	0.7	-0.356675	0.767677	-0.264387	0.444444	-0.81093	0.712871	-0.338454
277476	28	38	0	1	1	1	17.7134	0	0	1	1	0	0	0	0	0	0	0	0	0	0	1.04	1.33	0.7	0.79	1.2	0.96	12	12	12	16	16	16	1.06122	0.0594234	1.38542	0.326001	0.7	-0.356675	0.79798	-0.225672	1.21212	0.192372	0.950495	-0.0507723
179948	28	41	1	1	1	0	19.0443	0	1	0	0	0	0	0	0	0	0	0	0	0	0	1.54	0.8	1.1	0.87	0.58	0.89	13	13	13	17	17	17	1.57143	0.451985	0.833333	-0.182322	1.1	0.0953102	0.878788	-0.129212	0.604167	-0.503905	0.872549	-0.136336
160314	27	39	0	1	0	1	22.3517	0	1	0	0	0	0	0	0	0	0	0	0	0	0	0.53	1.22	0.8	1	1.71	1.1	12	12	12	16	16	16	0.540816	-0.614676	1.27083	0.239673	0.8	-0.223144	1.0101	0.0100503	1.72727	0.546544	1.08911	0.0853598
277559	35	39	1	1	1	1	21.3039	0	0	0	1	0	0	0	0	0	0	0	0	0	0	1.2	0.65	1	1.01	0.61	0.87	13	13	13	17	17	17	1.22449	0.202524	0.677083	-0.389961	1	0	1.0202	0.0200007	0.635417	-0.453474	0.852941	-0.159065
75510	36	31	1	1	1	1	23.4602	0	0	1	1	1	1	1	0	0	0	0	0	0	0	0.53	0.96	1	1.27	1.17	0.83	12	12	12	17	17	17	0.540816	-0.614676	1	0	1	0	1.28283	0.249067	1.21875	0.197826	0.813725	-0.206132
278399	22	39	1	1	1	1	18.7783	0	0	1	1	0	0	0	0	0	0	0	0	0	0	1.34	2.33	0.9	1.32	1.48	1.35	14	14	14	18	18	18	1.27619	0.243879	2.50538	0.918439	0.9	-0.105361	1.33333	0.287682	1.57447	0.453917	1.28571	0.251314
277710	29	37	1	1	1	1	19.7239	0	1	0	0	0	0	0	0	0	0	0	0	0	0	1.13	0.56	1.3	0.5	0.44	1.2	12	12	12	16	16	16	1.15306	0.14242	0.583333	-0.538997	1.3	0.262364	0.505051	-0.683097	0.444444	-0.81093	1.18812	0.172371
278527	31	40	0	1	1	1	19.736	0	1	0	0	0	0	0	0	0	0	0	0	0	0	0.89	0.49	0.8	0.62	0.43	1.04	13	13	13	17	17	17	0.908163	-0.0963311	0.510417	-0.672528	0.8	-0.223144	0.626263	-0.467985	0.447917	-0.803148	1.01961	0.0194181
276491	33	38	0	1	0	0	19.2608	0	1	0	1	0	0	0	0	1	0	0	0	0	0	1.45	0.65	0.8	1.19	0.53	2.01	13	13	13	17	17	17	1.47959	0.391766	0.677083	-0.389961	0.8	-0.223144	1.20202	0.184004	0.552083	-0.594056	1.97059	0.678332
278634	28	39	0	1	1	1	18.75	0	1	1	1	0	0	0	0	0	0	0	0	0	0	0.95	1.62	1	1.36	2	0.95	12	12	12	16	16	16	0.969388	-0.0310906	1.6875	0.523248	1	0	1.37374	0.317535	2.0202	0.703198	0.940594	-0.0612436
276349	26	39	0	1	1	1	21.0727	0	0	0	0	0	0	0	0	0	0	0	0	0	0	2.76	0.59	0.8	0.91	1.24	0.74	13	13	13	20	20	20	2.81633	1.03543	0.614583	-0.486811	0.8	-0.223144	0.90099	-0.104261	1.34783	0.298493	0.691589	-0.368764
276374	33	38	1	1	1	0	18.5901	1	1	1	1	0	0	0	0	0	0	1	0	0	0	0.64	0.4	0.7	1.25	0.52	1.17	12	12	12	16	16	16	0.653061	-0.426084	0.416667	-0.875469	0.7	-0.356675	1.26263	0.233194	0.525253	-0.643876	1.15842	0.147053
276398	29	39	0	1	1	1	25.3906	0	1	0	0	0	0	0	0	0	0	0	0	0	0	2.22	0.88	1.3	0.46	0.98	0.84	13	13	13	17	17	17	2.26531	0.81771	0.916667	-0.0870114	1.3	0.262364	0.464646	-0.766478	1.02083	0.0206193	0.823529	-0.194156
276400	27	39	1	1	1	1	20.052	0	0	0	0	0	0	0	0	0	0	1	0	0	0	1.35	0.44	0.8	0.77	0.33	1.13	13	13	13	17	17	17	1.37755	0.320307	0.458333	-0.780159	0.8	-0.223144	0.777778	-0.251314	0.34375	-1.06784	1.10784	0.102415
277387	23	39	0	1	0	0	17.8465	0	1	0	1	0	0	0	0	1	0	0	0	0	0	0.58	0.98	1.4	1.22	0.81	0.98	12	12	12	16	16	16	0.591837	-0.524524	1.02083	0.0206193	1.4	0.336472	1.23232	0.208901	0.818182	-0.200671	0.970297	-0.030153
276813	28	40	0	0	1	1	22.6562	0	0	0	0	0	0	0	0	0	0	0	0	0	0	1.36	1.63	0.8	0.83	3.31	1.32	13	13	13	17	17	17	1.38776	0.327687	1.69792	0.529402	0.8	-0.223144	0.838384	-0.176279	3.44792	1.23777	1.29412	0.257829
276821	29	39	0	1	1	1	20.0796	0	0	1	0	0	0	0	0	0	0	0	0	0	0	0.5	1.88	0.9	1	1.94	1.28	13	13	13	17	17	17	0.510204	-0.672944	1.95833	0.672094	0.9	-0.105361	1.0101	0.0100503	2.02083	0.70351	1.2549	0.227057
276824	25	39	0	1	1	1	18.1967	0	0	1	1	0	0	0	0	0	0	0	0	0	0	0.43	0.21	1.3	0.65	0.23	1.47	13	13	13	17	17	17	0.438776	-0.823767	0.21875	-1.51983	1.3	0.262364	0.656566	-0.420733	0.239583	-1.42885	1.44118	0.36546
160791	36	38	0	1	1	0	25.7812	0	1	1	1	0	0	0	0	1	0	1	0	0	0	0.67	1.2	0.9	0.94	1.5	1.26	12	12	12	16	16	16	0.683673	-0.380275	1.25	0.223144	0.9	-0.105361	0.949495	-0.0518251	1.51515	0.415515	1.24752	0.221161
277125	31	40	0	1	1	0	21.2306	0	1	0	0	0	0	0	0	0	0	0	0	0	0	1.86	1.41	1.1	1.02	1.63	1.28	13	13	13	17	17	17	1.89796	0.640779	1.46875	0.384412	1.1	0.0953102	1.0303	0.029853	1.69792	0.529402	1.2549	0.227057
278517	32	38	0	1	0	0	20.3954	0	1	1	1	0	0	0	0	0	0	0	0	0	0	0.82	0.39	0.9	0.73	0.4	0.86	11	11	11	16	16	16	0.863158	-0.147158	0.397959	-0.921406	0.9	-0.105361	0.737374	-0.30466	0.40404	-0.90624	0.851485	-0.160773
278519	31	38	1	1	1	1	20.0288	0	0	1	1	0	0	0	0	0	0	0	0	0	0	1	0.86	0.7	0.73	0.72	0.9	13	13	13	17	17	17	1.02041	0.0202027	0.895833	-0.110001	0.7	-0.356675	0.737374	-0.30466	0.75	-0.287682	0.882353	-0.125163
278523	24	40	0	1	1	0	17.9688	0	0	1	1	0	0	0	0	0	0	0	0	0	0	1.23	2.25	0.9	0.91	1.31	0.88	13	13	13	17	17	17	1.2551	0.227217	2.34375	0.851752	0.9	-0.105361	0.919192	-0.0842603	1.36458	0.310849	0.862745	-0.147636
84795	31	39	1	1	0	1	23.6244	1	1	1	0	0	0	0	0	1	0	0	0	0	0	0.54	0.61	1.3	0.79	0.42	0.93	13	13	13	20	20	20	0.55102	-0.595983	0.635417	-0.453474	1.3	0.262364	0.782178	-0.245673	0.456522	-0.784119	0.869159	-0.140229
31476	38	39	0	1	1	1	21.6418	0	1	0	1	0	0	0	0	0	0	1	0	0	0	1.09	1.45	0.9	1.13	1.48	1.69	13	13	13	16	16	16	1.11224	0.10638	1.51042	0.412386	0.9	-0.105361	1.14141	0.132268	1.49495	0.402092	1.67327	0.514778
227766	24	39	1	1	1	0	21.4844	0	1	1	1	0	0	0	0	0	0	0	0	0	0	0.66	0.66	1.4	0.52	0.53	0.9	11	11	11	17	17	17	0.694737	-0.364222	0.673469	-0.395313	1.4	0.336472	0.525253	-0.643876	0.552083	-0.594056	0.882353	-0.125163
277849	34	39	0	1	1	0	19.1001	0	1	1	1	0	0	0	0	1	0	0	0	0	0	0.86	1.16	0.8	0.51	1.01	1.05	12	12	12	18	18	18	0.877551	-0.13062	1.20833	0.189242	0.8	-0.223144	0.515152	-0.663294	1.07447	0.0718257	1	0
277876	28	40	0	1	1	1	22.6562	0	0	0	0	0	0	0	0	0	0	0	0	0	0	0.94	1.94	1.4	0.86	2.66	1.01	13	13	13	17	17	17	0.959184	-0.0416727	2.02083	0.70351	1.4	0.336472	0.868687	-0.140773	2.77083	1.01915	0.990196	-0.0098523
225353	38	39	0	1	1	1	18.4425	0	0	1	0	0	0	0	1	0	0	0	0	0	0	1.62	0.48	0.6	0.95	0.73	1.13	13	13	13	17	17	17	1.65306	0.502629	0.5	-0.693147	0.6	-0.510826	0.959596	-0.041243	0.760417	-0.273889	1.10784	0.102415
277928	28	40	0	1	1	0	21.4844	0	0	0	0	0	0	0	0	0	0	1	0	0	0	0.32	0.58	1.1	1.43	0.89	1.24	12	12	12	16	16	16	0.326531	-1.11923	0.604167	-0.503905	1.1	0.0953102	1.44444	0.367725	0.89899	-0.106483	1.22772	0.205161
277958	29	39	0	1	0	1	20.7031	0	0	0	0	0	0	0	0	0	0	0	0	0	0	0.92	3.03	0.6	0.63	2.22	0.64	13	13	13	17	17	17	0.938776	-0.0631789	3.15625	1.14938	0.6	-0.510826	0.636364	-0.451985	2.3125	0.838329	0.627451	-0.46609
277416	30	39	1	1	0	0	23.4375	0	1	0	0	0	0	0	0	0	0	1	0	0	0	0.62	4.72	1.2	1.2	2.64	0.82	13	13	13	17	17	17	0.632653	-0.457833	4.91667	1.59263	1.2	0.182322	1.21212	0.192372	2.75	1.0116	0.803922	-0.218254
230868	34	39	0	1	1	1	23.3333	0	1	0	0	0	0	0	0	0	0	0	0	0	0	1.45	0.67	1	0.55	0.53	1.3	12	12	12	16	16	16	1.47959	0.391766	0.697917	-0.359656	1	0	0.555556	-0.587787	0.535354	-0.624828	1.28713	0.252414
166345	27	39	1	1	0	0	22.3488	0	1	1	0	0	0	0	0	0	0	0	0	0	0	0.54	0.59	1	0.67	0.61	1.03	12	12	12	16	16	16	0.55102	-0.595983	0.614583	-0.486811	1	0	0.676768	-0.390427	0.616162	-0.484246	1.0198	0.0196085
120220	32	40	0	1	1	1	17.1563	0	1	0	0	0	0	0	0	0	0	0	0	0	0	0.77	0.96	1.1	1.27	1.28	1.29	12	12	12	16	16	16	0.785714	-0.241162	1	0	1.1	0.0953102	1.28283	0.249067	1.29293	0.25691	1.27723	0.244692
277449	29	39	1	1	1	1	19.3222	0	0	0	1	0	0	0	0	0	0	0	0	0	0	1.9	1.77	0.8	0.83	1.79	1.15	13	13	13	17	17	17	1.93878	0.662057	1.84375	0.611802	0.8	-0.223144	0.838384	-0.176279	1.86458	0.623038	1.12745	0.119959
204995	30	37	1	1	1	0	18.9745	0	1	0	0	0	0	0	0	0	0	0	0	0	0	1.45	0.71	1	0.8	0.98	1.22	13	13	13	17	17	17	1.47959	0.391766	0.739583	-0.301668	1	0	0.808081	-0.213093	1.02083	0.0206193	1.19608	0.179048
277887	25	38	1	1	0	0	17.7999	0	0	1	1	0	0	0	0	0	0	1	0	0	0	1	1.24	1.1	1.18	0.48	1.2	12	12	12	16	16	16	1.02041	0.0202027	1.29167	0.255933	1.1	0.0953102	1.19192	0.175565	0.484848	-0.723919	1.18812	0.172371
277922	27	38	0	1	1	1	21.7773	0	0	1	1	0	0	0	0	0	0	1	0	0	0	0.57	0.44	1.4	0.73	0.34	1.44	13	13	13	17	17	17	0.581633	-0.541916	0.458333	-0.780159	1.4	0.336472	0.737374	-0.30466	0.354167	-1.03799	1.41176	0.34484
277138	22	38	0	1	0	1	17.6254	0	0	0	1	0	0	0	0	0	0	0	0	0	0	0.83	0.69	0.8	1.31	1.43	1.05	12	12	12	18	18	18	0.846939	-0.166127	0.71875	-0.330242	0.8	-0.223144	1.32323	0.280077	1.52128	0.41955	1	0
277163	30	41	1	1	1	1	19.9792	0	0	0	0	0	0	0	0	0	0	0	0	0	0	1.28	1.3	0.9	1.15	1.25	0.94	12	12	12	18	18	18	1.30612	0.267063	1.35417	0.303186	0.9	-0.105361	1.16162	0.149812	1.32979	0.285019	0.895238	-0.110666
164121	32	40	1	1	1	1	18.2563	0	1	0	0	0	0	0	0	0	0	0	0	0	0	0.96	1.26	1.3	0.76	0.69	0.89	13	13	13	17	17	17	0.979592	-0.0206193	1.3125	0.271934	1.3	0.262364	0.767677	-0.264387	0.71875	-0.330242	0.872549	-0.136336
176167	25	32	0	1	1	1	22.4609	0	1	0	0	1	1	1	0	1	0	0	0	0	0	0.92	1.24	0.8	0.9	1.05	1.28	12	12	12	16	16	16	0.938776	-0.0631789	1.29167	0.255933	0.8	-0.223144	0.909091	-0.0953102	1.06061	0.0588405	1.26733	0.23691
256168	31	38	0	1	1	1	21.0962	0	1	0	0	0	0	0	0	0	0	0	0	0	0	1.52	4.16	0.8	0.95	3.14	1.67	13	13	13	17	17	17	1.55102	0.438913	4.33333	1.46634	0.8	-0.223144	0.959596	-0.041243	3.27083	1.18504	1.63725	0.493021
277809	27	40	1	1	0	0	20.8889	0	1	0	1	0	0	0	0	1	0	0	0	0	0	0.61	1.04	1.2	0.49	0.67	0.61	13	13	13	16	16	16	0.622449	-0.474094	1.08333	0.0800427	1.2	0.182322	0.494949	-0.7033	0.676768	-0.390427	0.60396	-0.504247
275728	27	40	1	1	1	1	18.7783	0	0	0	0	0	0	0	0	0	0	0	0	0	0	0.62	0.62	0.6	0.73	1.12	0.86	11	11	11	14	14	14	0.652632	-0.426743	0.632653	-0.457833	0.6	-0.510826	0.722772	-0.324661	1.0566	0.0550598	0.905263	-0.0995296
159033	27	40	1	1	1	0	19.0677	0	1	0	0	0	0	0	0	0	0	0	0	0	0	1.01	0.47	1.3	0.85	0.33	1.13	13	13	13	17	17	17	1.03061	0.030153	0.489583	-0.714201	1.3	0.262364	0.858586	-0.152469	0.34375	-1.06784	1.10784	0.102415
139299	31	39	0	1	1	1	14.36	0	1	1	1	0	0	0	0	0	0	0	0	0	0	0.64	2.86	0.7	1.19	1.81	0.83	13	13	13	17	17	17	0.653061	-0.426084	2.97917	1.09164	0.7	-0.356675	1.20202	0.184004	1.88542	0.634149	0.813725	-0.206132
278782	32	40	0	1	0	0	20.1348	0	1	0	0	0	0	0	0	0	0	1	0	0	0	1.2	0.62	0.9	0.97	0.5	1.29	12	12	12	16	16	16	1.22449	0.202524	0.645833	-0.437214	0.9	-0.105361	0.979798	-0.0204089	0.505051	-0.683097	1.27723	0.244692
276446	24	40	1	1	0	1	21.2306	0	0	0	0	0	0	0	0	0	0	0	0	0	0	2.42	0.92	1	1.12	1	1.52	13	13	13	17	17	17	2.46939	0.90397	0.958333	-0.0425596	1	0	1.13131	0.123379	1.04167	0.040822	1.4902	0.398908
276450	32	37	1	1	0	1	20	0	1	0	0	0	0	0	0	0	0	0	0	0	0	1.23	0.65	1.2	1.16	1	1.32	12	12	12	16	16	16	1.2551	0.227217	0.677083	-0.389961	1.2	0.182322	1.17172	0.15847	1.0101	0.0100503	1.30693	0.267681
263754	31	40	0	1	1	1	19.2894	0	1	0	0	0	0	0	0	0	0	0	0	0	0	0.57	1.9	0.9	0.77	1.63	0.7	13	13	13	17	17	17	0.581633	-0.541916	1.97917	0.682676	0.9	-0.105361	0.777778	-0.251314	1.69792	0.529402	0.686275	-0.376478
276500	27	41	0	1	1	1	21.0938	0	0	0	0	0	0	0	0	0	0	0	0	0	0	0.87	0.73	0.8	0.8	0.98	1.19	13	13	13	17	17	17	0.887755	-0.119059	0.760417	-0.273889	0.8	-0.223144	0.808081	-0.213093	1.02083	0.0206193	1.16667	0.154151
276510	33	38	1	1	1	1	24.4975	0	0	0	0	0	0	0	1	0	0	0	0	0	0	1.09	0.38	1	1.4	0.94	1.19	12	12	12	16	16	16	1.11224	0.10638	0.395833	-0.926762	1	0	1.41414	0.346523	0.949495	-0.0518251	1.17822	0.164003
154771	25	40	1	1	0	0	18.026	1	1	1	1	0	0	0	0	0	0	0	0	0	0	1.21	1.38	0.5	1.28	1.09	0.96	12	12	12	16	16	16	1.23469	0.210823	1.4375	0.362905	0.5	-0.693147	1.29293	0.25691	1.10101	0.096228	0.950495	-0.0507723
276099	30	39	1	1	1	1	20.1733	0	1	0	1	0	0	0	0	1	0	0	0	0	0	0.86	0.81	0.9	0.73	0.62	1.01	12	12	12	17	17	17	0.877551	-0.13062	0.84375	-0.169899	0.9	-0.105361	0.737374	-0.30466	0.645833	-0.437214	0.990196	-0.0098523
277296	28	38	1	1	1	1	24.0346	0	0	1	0	0	0	0	0	0	0	0	0	0	0	0.79	1.59	1.2	1.45	1.63	1.71	12	12	12	16	16	16	0.806122	-0.21552	1.65625	0.504556	1.2	0.182322	1.46465	0.381614	1.64646	0.49863	1.69307	0.526543
277314	27	39	0	1	1	0	21.6128	0	0	0	0	0	0	0	0	0	0	1	0	0	0	1.46	0.8	1.2	1.08	0.75	0.93	12	12	12	16	16	16	1.4898	0.398639	0.833333	-0.182322	1.2	0.182322	1.09091	0.0870114	0.757576	-0.277632	0.920792	-0.082521
240789	29	38	0	1	1	1	17.9282	0	1	0	1	0	0	0	0	0	0	0	0	0	0	0.49	2.06	1.2	0.76	2.02	0.94	13	13	13	17	17	17	0.5	-0.693147	2.14583	0.763528	1.2	0.182322	0.767677	-0.264387	2.10417	0.74392	0.921569	-0.081678
102696	31	40	0	0	1	0	19.7796	0	1	1	1	0	0	0	0	0	0	0	0	0	0	0.61	1.3	1.2	1.09	0.78	1.03	13	13	13	18	18	18	0.622449	-0.474094	1.35417	0.303186	1.2	0.182322	1.10101	0.096228	0.829787	-0.186586	0.980952	-0.0192314
265387	25	40	1	1	0	1	19.9219	0	0	0	0	0	0	0	0	0	0	0	0	1	0	0.9	2.77	0.9	1.08	2.18	1.1	12	12	12	16	16	16	0.918367	-0.0851578	2.88542	1.05967	0.9	-0.105361	1.09091	0.0870114	2.20202	0.789375	1.08911	0.0853598
277252	33	40	1	1	1	1	23.6719	0	0	1	1	0	0	0	0	0	0	1	0	0	0	0.55	0.48	1.4	1.14	0.44	1.56	13	13	13	17	17	17	0.561224	-0.577634	0.5	-0.693147	1.4	0.336472	1.15152	0.141079	0.458333	-0.780159	1.52941	0.424883
276151	30	39	1	1	1	1	18.8189	0	0	0	0	0	0	0	0	0	0	0	0	0	0	0.85	1.64	1	0.83	1.25	1.06	13	13	13	17	17	17	0.867347	-0.142316	1.70833	0.535518	1	0	0.838384	-0.176279	1.30208	0.263966	1.03922	0.0384663
276153	28	39	1	1	0	1	21.6072	0	1	1	0	0	0	0	0	0	0	0	0	0	0	0.31	2.78	1.1	1.12	1.9	0.71	12	12	12	17	17	17	0.316327	-1.15098	2.89583	1.06327	1.1	0.0953102	1.13131	0.123379	1.97917	0.682676	0.696078	-0.362293
277325	29	40	0	1	1	1	20.202	0	0	0	0	0	0	0	0	0	0	1	0	0	0	1.3	0.48	1.7	0.71	0.39	1.02	12	12	12	16	16	16	1.32653	0.282567	0.5	-0.693147	1.7	0.530628	0.717172	-0.33244	0.393939	-0.931558	1.0099	0.0098523
277351	32	38	0	1	1	1	21.0517	0	1	1	0	0	0	0	0	1	0	0	0	0	0	1.36	1.62	1.2	1.39	2.17	0.96	13	13	13	17	17	17	1.38776	0.327687	1.6875	0.523248	1.2	0.182322	1.40404	0.339354	2.26042	0.815549	0.941176	-0.0606246
277388	29	40	0	1	1	0	19.5556	0	0	0	0	0	0	0	0	0	0	0	0	0	0	1.71	1.14	1.1	1.52	1.07	1.02	13	13	13	17	17	17	1.7449	0.556696	1.1875	0.17185	1.1	0.0953102	1.53535	0.428761	1.11458	0.108481	1	0
277942	26	38	0	0	1	1	20.3402	0	0	1	1	0	0	0	0	0	0	0	0	0	0	0.47	0.8	0.9	0.88	0.79	0.9	12	12	12	17	17	17	0.479592	-0.73482	0.833333	-0.182322	0.9	-0.105361	0.888889	-0.117783	0.822917	-0.1949	0.882353	-0.125163
278137	26	39	0	1	1	1	26.9399	0	0	0	0	0	0	0	0	0	0	0	0	0	0	0.46	1.13	1	0.89	1.45	0.84	12	12	12	16	16	16	0.469388	-0.756326	1.17708	0.16304	1	0	0.89899	-0.106483	1.46465	0.381614	0.831683	-0.184304
187747	30	39	0	1	1	0	20.0777	0	1	0	0	0	0	0	0	1	0	0	0	0	0	0.51	1.41	0.9	0.91	1.27	1.11	13	13	13	16	16	16	0.520408	-0.653142	1.46875	0.384412	0.9	-0.105361	0.919192	-0.0842603	1.28283	0.249067	1.09901	0.0944097
278180	23	40	1	1	1	0	16.2573	0	0	1	0	0	0	0	0	0	0	0	0	0	0	1.17	0.7	0.5	0.74	0.38	0.91	13	13	13	17	17	17	1.19388	0.177206	0.729167	-0.315853	0.5	-0.693147	0.747475	-0.291055	0.395833	-0.926762	0.892157	-0.114113
204572	33	38	1	1	0	1	22.8183	0	1	1	1	0	0	0	0	0	0	0	0	0	0	1.72	0.63	1	1.14	0.54	1.06	12	12	12	16	16	16	1.7551	0.562527	0.65625	-0.421213	1	0	1.15152	0.141079	0.545455	-0.606136	1.0495	0.0483186
276136	27	39	0	1	1	1	16.4155	0	0	0	0	0	0	0	0	0	0	0	0	0	0	0.56	1.17	1.2	0.73	1.03	1.03	12	12	12	16	16	16	0.571429	-0.559616	1.21875	0.197826	1.2	0.182322	0.737374	-0.30466	1.0404	0.0396091	1.0198	0.0196085
276167	25	38	1	1	1	1	20.3125	0	0	1	1	0	0	0	1	0	0	0	0	0	0	2.04	0.53	0.6	2.03	0.58	1.44	12	12	12	17	17	17	2.08163	0.733153	0.552083	-0.594056	0.6	-0.510826	2.05051	0.718086	0.604167	-0.503905	1.41176	0.34484
234545	37	39	1	1	1	1	20.9644	0	1	0	0	0	0	0	0	1	0	0	0	0	0	2.46	1.84	1	7.89	1.01	1.34	13	13	13	17	17	17	2.5102	0.920364	1.91667	0.650588	1	0	7.9697	2.07565	1.05208	0.0507723	1.31373	0.272867
276194	26	39	1	1	1	0	23.4375	0	1	0	0	0	0	0	0	0	0	1	0	0	0	0.94	0.75	1.1	1	1.01	1.23	12	12	12	18	18	18	0.959184	-0.0416727	0.78125	-0.24686	1.1	0.0953102	1.0101	0.0100503	1.07447	0.0718257	1.17143	0.158224
207639	38	39	0	1	1	0	18.9866	0	1	0	0	0	0	0	0	1	0	0	0	0	0	1.01	1.24	1	1.02	0.84	1.18	13	13	13	17	17	17	1.03061	0.030153	1.29167	0.255933	1	0	1.0303	0.029853	0.875	-0.133531	1.15686	0.145712
276227	23	39	1	1	1	1	20.0692	0	0	1	1	0	0	0	0	0	0	1	0	0	0	0.46	0.43	0.9	0.71	0.49	0.97	12	12	12	16	16	16	0.469388	-0.756326	0.447917	-0.803148	0.9	-0.105361	0.717172	-0.33244	0.494949	-0.7033	0.960396	-0.0404095
276272	25	41	1	1	1	0	20.0208	0	0	1	0	0	0	0	0	0	0	0	0	0	0	0.37	0.4	1	0.67	0.44	1.15	13	13	13	17	17	17	0.377551	-0.97405	0.416667	-0.875469	1	0	0.676768	-0.390427	0.458333	-0.780159	1.12745	0.119959
276817	30	40	0	1	1	1	22.3478	0	0	0	0	0	0	0	0	0	0	0	0	0	0	1.49	1.15	0.7	1.14	0.79	1.58	12	12	12	15	15	15	1.52041	0.418979	1.19792	0.180584	0.7	-0.356675	1.14	0.131028	0.759615	-0.274943	1.61224	0.477628
277560	28	40	0	1	1	1	20.7008	0	0	0	1	0	0	0	0	0	0	1	0	0	0	1.26	1.94	1.1	0.93	1.38	0.96	13	13	13	17	17	17	1.28571	0.251314	2.02083	0.70351	1.1	0.0953102	0.939394	-0.0625204	1.4375	0.362905	0.941176	-0.0606246
277598	24	39	1	1	1	1	20.0398	0	0	1	0	0	0	0	0	0	0	0	0	0	0	1.1	1.89	1.3	1.46	1.94	1.06	12	12	12	16	16	16	1.12245	0.115513	1.96875	0.677399	1.3	0.262364	1.47475	0.388487	1.9596	0.672738	1.0495	0.0483186
277599	31	38	0	1	1	1	17.9418	0	1	0	1	0	0	0	0	0	0	0	0	0	0	1.57	1.67	1	0.68	1.61	1.08	12	12	12	16	16	16	1.60204	0.471278	1.73958	0.553646	1	0	0.686869	-0.375612	1.62626	0.486285	1.06931	0.0670107
276477	24	39	1	1	0	1	19.9003	0	0	0	1	0	0	0	0	0	0	1	0	0	0	1.89	1.36	1	1.12	1.49	1.47	12	12	12	16	16	16	1.92857	0.65678	1.41667	0.348307	1	0	1.13131	0.123379	1.50505	0.408826	1.45545	0.375312
152754	30	38	0	1	1	1	24.3494	0	1	1	1	0	0	0	0	0	0	0	0	0	0	0.41	0.84	1.1	0.61	0.81	0.76	12	12	12	16	16	16	0.418367	-0.871395	0.875	-0.133531	1.1	0.0953102	0.616162	-0.484246	0.818182	-0.200671	0.752475	-0.284387
278235	32	39	0	1	1	0	20.3428	0	1	0	0	0	0	0	0	0	0	0	0	0	0	0.51	0.52	0.9	1.24	0.57	1.18	12	12	12	16	16	16	0.520408	-0.653142	0.541667	-0.613104	0.9	-0.105361	1.25253	0.225162	0.575758	-0.552069	1.16832	0.155564
278242	23	40	1	1	1	1	21.7738	0	0	1	0	0	0	0	0	0	0	0	0	0	0	0.82	1.29	0.9	0.87	1.43	0.72	12	12	12	16	16	16	0.836735	-0.178248	1.34375	0.295464	0.9	-0.105361	0.878788	-0.129212	1.44444	0.367725	0.712871	-0.338454
221938	26	38	1	1	0	1	19.5717	0	1	1	1	0	0	0	0	0	0	0	0	0	0	0.46	0.3	1.1	0.51	0.32	1.16	12	12	12	15	15	15	0.469388	-0.756326	0.3125	-1.16315	1.1	0.0953102	0.51	-0.673345	0.307692	-1.17865	1.18367	0.168623
277000	28	41	0	1	1	1	21.5019	0	0	0	0	0	0	0	0	0	0	0	0	0	0	0.53	0.55	0.8	0.72	0.81	0.87	13	13	13	17	17	17	0.540816	-0.614676	0.572917	-0.557015	0.8	-0.223144	0.727273	-0.318454	0.84375	-0.169899	0.852941	-0.159065
276818	34	38	1	1	0	1	20.6396	0	1	1	1	0	0	0	0	0	0	1	0	0	0	0.61	0.69	1	0.98	0.58	0.97	12	12	12	16	16	16	0.622449	-0.474094	0.71875	-0.330242	1	0	0.989899	-0.0101524	0.585859	-0.534677	0.960396	-0.0404095
276839	30	41	1	1	1	1	17.6753	0	0	0	0	0	0	0	0	0	0	0	0	0	0	1.83	0.59	0.7	0.83	0.5	1.02	12	12	12	16	16	16	1.86735	0.624519	0.614583	-0.486811	0.7	-0.356675	0.838384	-0.176279	0.505051	-0.683097	1.0099	0.0098523
248148	24	39	0	1	0	1	21.3333	0	1	0	0	0	0	0	0	0	0	0	0	0	0	1.24	1.23	1.1	0.64	1.2	0.76	13	13	13	18	18	18	1.26531	0.235314	1.28125	0.247836	1.1	0.0953102	0.646465	-0.436237	1.2766	0.244197	0.72381	-0.323227
277345	31	40	1	1	0	0	22.8928	0	1	1	1	0	0	0	0	1	0	0	0	0	0	1.17	1.03	1.2	1.14	1.19	0.91	13	13	13	18	18	18	1.19388	0.177206	1.07292	0.0703808	1.2	0.182322	1.15152	0.141079	1.26596	0.235829	0.866667	-0.143101
190590	26	35	1	1	1	0	20.7031	0	1	0	0	1	0	1	0	0	0	0	0	0	0	0.49	0.9	1.5	0.89	0.99	1.51	12	12	12	17	17	17	0.5	-0.693147	0.9375	-0.0645385	1.5	0.405465	0.89899	-0.106483	1.03125	0.0307717	1.48039	0.392307
221063	30	39	0	1	0	1	23.8281	0	1	0	0	0	0	0	0	0	0	0	0	0	0	1	0.52	1.4	1.1	0.68	1.11	13	13	13	18	18	18	1.02041	0.0202027	0.541667	-0.613104	1.4	0.336472	1.11111	0.105361	0.723404	-0.323787	1.05714	0.0555699
276677	24	38	0	1	1	0	17.0656	0	0	0	0	0	0	0	0	0	0	0	0	0	0	0.38	0.21	1.1	0.91	0.12	1.11	13	13	13	18	18	18	0.387755	-0.947381	0.21875	-1.51983	1.1	0.0953102	0.919192	-0.0842603	0.12766	-2.05839	1.05714	0.0555699
195592	33	38	1	1	1	0	18.4911	0	1	1	0	0	0	0	0	0	0	0	0	0	0	1.45	0.97	1.1	0.81	0.6	1.25	12	12	12	16	16	16	1.47959	0.391766	1.01042	0.0103628	1.1	0.0953102	0.818182	-0.200671	0.606061	-0.500775	1.23762	0.213193
276508	27	39	0	1	1	1	22.9591	0	1	0	0	0	0	0	0	0	0	0	0	0	0	1.53	0.69	0.8	0.79	0.77	1.18	12	12	12	16	16	16	1.56122	0.44547	0.71875	-0.330242	0.8	-0.223144	0.79798	-0.225672	0.777778	-0.251314	1.16832	0.155564
276509	26	38	0	1	1	0	16.7492	0	0	0	0	0	0	0	0	0	0	0	0	0	0	1.29	1.25	1.2	0.71	1.65	0.88	12	12	12	16	16	16	1.31633	0.274845	1.30208	0.263966	1.2	0.182322	0.717172	-0.33244	1.66667	0.510826	0.871287	-0.137784
277469	33	39	1	1	1	1	20.1236	0	0	0	0	0	0	0	0	0	0	0	0	0	0	2.48	0.99	0.8	1.96	0.81	1.01	11	11	11	15	15	15	2.61053	0.959552	1.0102	0.0101524	0.8	-0.223144	1.96	0.672944	0.778846	-0.249942	1.03061	0.030153
216013	26	40	1	1	0	0	25.1532	0	0	1	1	0	0	0	0	0	0	0	0	0	0	2.92	0.58	1.1	1.18	0.86	1.59	12	12	12	16	16	16	2.97959	1.09179	0.604167	-0.503905	1.1	0.0953102	1.19192	0.175565	0.868687	-0.140773	1.57426	0.453784
233613	28	37	1	1	0	1	18.5178	0	1	0	0	0	0	0	0	0	0	0	0	0	0	1.18	0.92	0.7	0.8	0.71	1.13	12	12	12	16	16	16	1.20408	0.185717	0.958333	-0.0425596	0.7	-0.356675	0.808081	-0.213093	0.717172	-0.33244	1.11881	0.112267
276693	27	39	0	1	1	0	20.1264	0	1	0	0	0	0	0	0	1	0	0	0	0	0	0.9	0.36	1.4	1.13	0.49	0.86	13	13	13	17	17	17	0.918367	-0.0851578	0.375	-0.980829	1.4	0.336472	1.14141	0.132268	0.510417	-0.672528	0.843137	-0.170626
277019	30	35	0	1	1	1	19.433	0	0	0	0	1	0	1	0	0	0	0	0	0	0	1.49	3.9	1	0.84	3	1.24	12	12	12	16	16	16	1.52041	0.418979	4.0625	1.4018	1	0	0.848485	-0.164303	3.0303	1.10866	1.22772	0.205161
275997	33	40	1	1	1	1	25.4767	0	1	0	1	0	0	0	0	0	0	1	0	0	0	0.58	0.48	1.3	1.05	0.29	0.84	12	12	12	16	16	16	0.591837	-0.524524	0.5	-0.693147	1.3	0.262364	1.06061	0.0588405	0.292929	-1.22782	0.831683	-0.184304
276011	23	39	1	1	1	1	18.5224	0	0	0	1	0	0	0	0	0	0	0	0	0	0	1.68	1.9	0.5	0.87	1.69	1.08	12	12	12	16	16	16	1.71429	0.538997	1.97917	0.682676	0.5	-0.693147	0.878788	-0.129212	1.70707	0.534779	1.06931	0.0670107
276073	24	38	1	1	0	0	20.3244	0	0	1	0	0	0	0	0	0	0	0	0	0	0	1.64	0.71	1.1	1.45	0.52	1.18	13	13	13	18	18	18	1.67347	0.514899	0.739583	-0.301668	1.1	0.0953102	1.46465	0.381614	0.553191	-0.592051	1.12381	0.116724
241587	23	40	0	1	0	1	19.1066	0	1	0	1	0	0	0	0	0	0	0	0	0	0	0.61	0.53	0.9	0.88	0.55	1.37	12	12	12	17	17	17	0.622449	-0.474094	0.552083	-0.594056	0.9	-0.105361	0.888889	-0.117783	0.572917	-0.557015	1.34314	0.295008
193774	33	39	1	1	1	1	22.5827	0	1	0	0	0	0	0	0	0	0	1	0	0	0	1.39	1.01	1	0.8	1.02	0.98	12	12	12	17	17	17	1.41837	0.349506	1.05208	0.0507723	1	0	0.808081	-0.213093	1.0625	0.0606246	0.960784	-0.0400053
76765	33	39	1	1	1	1	23.6509	0	1	1	1	0	0	0	0	0	0	1	0	0	0	1	0.67	1.3	1.33	0.6	1.07	13	13	13	18	18	18	1.02041	0.0202027	0.697917	-0.359656	1.3	0.262364	1.34343	0.295229	0.638298	-0.44895	1.01905	0.0188685
232732	33	39	1	1	1	1	23.1473	0	1	0	0	0	0	0	0	0	0	1	0	0	0	0.42	0.53	0.8	0.67	0.59	1.12	11	11	11	15	15	15	0.442105	-0.816207	0.540816	-0.614676	0.8	-0.223144	0.67	-0.400478	0.567308	-0.566853	1.14286	0.133531
277104	30	39	0	1	1	1	20.3361	0	0	0	0	0	0	0	0	0	0	0	0	0	0	0.93	2.38	0.8	1.02	3.5	1.5	12	12	12	16	16	16	0.94898	-0.052368	2.47917	0.907922	0.8	-0.223144	1.0303	0.029853	3.53535	1.26281	1.48515	0.395515
277109	26	38	1	1	1	1	18.4021	0	0	0	0	0	0	0	0	0	0	0	0	0	0	0.54	0.81	0.7	1.5	1.35	1.7	12	12	12	16	16	16	0.55102	-0.595983	0.84375	-0.169899	0.7	-0.356675	1.51515	0.415515	1.36364	0.310155	1.68317	0.520678
277119	30	40	1	1	1	1	22.9421	0	1	0	1	0	0	0	0	0	0	0	0	0	0	0.47	1.56	0.7	0.63	0.78	0.94	12	12	12	17	17	17	0.479592	-0.73482	1.625	0.485508	0.7	-0.356675	0.636364	-0.451985	0.8125	-0.207639	0.921569	-0.081678
211538	27	39	1	1	0	1	18.6667	0	1	0	0	0	0	0	0	0	0	0	0	0	0	1.77	3.58	1.2	1.47	4.23	0.85	13	13	13	17	17	17	1.80612	0.591182	3.72917	1.31618	1.2	0.182322	1.48485	0.395313	4.40625	1.48302	0.833333	-0.182322
277776	23	40	1	1	1	0	18.0662	0	0	1	0	0	0	0	0	0	0	0	0	0	0	0.41	0.78	1.1	0.94	0.79	1.17	13	13	13	17	17	17	0.418367	-0.871395	0.8125	-0.207639	1.1	0.0953102	0.949495	-0.0518251	0.822917	-0.1949	1.14706	0.137201
277785	29	35	1	0	0	0	17.0245	0	0	0	0	1	0	1	1	0	0	0	0	0	0	1.76	0.41	0.9	1.12	0.46	1.08	13	13	13	17	17	17	1.79592	0.585517	0.427083	-0.850776	0.9	-0.105361	1.13131	0.123379	0.479167	-0.735707	1.05882	0.0571584
277802	29	40	1	1	1	1	19.5717	0	1	0	0	0	0	0	0	0	0	0	0	0	0	0.59	1.41	0.9	1.46	1.14	0.84	13	13	13	17	17	17	0.602041	-0.50743	1.46875	0.384412	0.9	-0.105361	1.47475	0.388487	1.1875	0.17185	0.823529	-0.194156
279158	28	38	0	1	1	0	24.841	0	0	1	1	0	0	0	0	0	0	1	0	0	0	0.72	0.88	0.9	1.13	1.05	1.34	13	13	13	17	17	17	0.734694	-0.308301	0.916667	-0.0870114	0.9	-0.105361	1.14141	0.132268	1.09375	0.0896122	1.31373	0.272867
279211	27	38	1	1	1	1	28.9205	0	0	0	0	0	0	0	0	0	0	0	0	0	0	1.49	0.56	1	1.6	0.61	1.06	12	12	12	17	17	17	1.52041	0.418979	0.583333	-0.538997	1	0	1.61616	0.480054	0.635417	-0.453474	1.03922	0.0384663
178425	32	39	1	1	1	1	21.7993	0	1	0	0	0	0	0	0	0	0	0	0	0	0	0.93	1.31	1	1.38	1.12	1.19	12	12	12	16	16	16	0.94898	-0.052368	1.36458	0.310849	1	0	1.39394	0.332134	1.13131	0.123379	1.17822	0.164003
276779	27	39	1	1	1	0	20.0777	0	1	1	1	0	0	0	0	0	0	0	0	0	0	1.08	1.65	0.7	0.88	2.7	0.92	12	12	12	17	17	17	1.10204	0.0971637	1.71875	0.541597	0.7	-0.356675	0.888889	-0.117783	2.8125	1.03407	0.901961	-0.103184
275955	28	40	1	1	1	1	18.3655	0	0	0	0	0	0	0	0	0	0	0	0	0	0	0.97	0.67	0.6	0.8	0.72	0.98	12	12	12	16	16	16	0.989796	-0.0102565	0.697917	-0.359656	0.6	-0.510826	0.808081	-0.213093	0.727273	-0.318454	0.970297	-0.030153
275963	23	37	0	1	1	1	23.3844	0	0	0	0	0	0	0	0	0	0	0	0	0	0	2.06	0.65	0.8	1.56	1.01	1.52	13	13	13	16	16	16	2.10204	0.742909	0.677083	-0.389961	0.8	-0.223144	1.57576	0.454736	1.0202	0.0200007	1.50495	0.40876
276009	27	39	0	1	1	1	25.6312	0	0	0	0	0	0	0	0	0	0	0	0	0	0	2.16	0.89	1.2	0.83	0.76	1.22	13	13	13	17	17	17	2.20408	0.790311	0.927083	-0.0757118	1.2	0.182322	0.838384	-0.176279	0.791667	-0.233615	1.19608	0.179048
125765	34	38	0	1	1	1	20.5457	0	1	0	0	0	0	0	0	0	0	0	0	0	0	0.81	1.22	0.7	1.33	1.59	0.92	12	12	12	16	16	16	0.826531	-0.190518	1.27083	0.239673	0.7	-0.356675	1.34343	0.295229	1.60606	0.473784	0.910891	-0.0933319
132123	29	39	0	1	0	0	18.7345	0	1	0	0	0	0	0	0	0	0	0	0	0	0	0.34	0.95	0.9	0.61	0.63	0.61	13	13	13	17	17	17	0.346939	-1.05861	0.989583	-0.0104713	0.9	-0.105361	0.616162	-0.484246	0.65625	-0.421213	0.598039	-0.514099
275941	27	40	0	1	0	0	20.4467	0	0	0	1	0	0	0	0	0	0	0	0	1	0	0.68	0.78	0.7	1.69	1.08	0.81	12	12	12	16	16	16	0.693878	-0.36546	0.8125	-0.207639	0.7	-0.356675	1.70707	0.534779	1.09091	0.0870114	0.80198	-0.220671
275958	27	40	0	1	1	1	22.1852	0	0	1	0	0	0	0	0	0	0	1	0	0	0	0.87	0.81	0.8	0.8	0.73	1.08	12	12	12	17	17	17	0.887755	-0.119059	0.84375	-0.169899	0.8	-0.223144	0.808081	-0.213093	0.760417	-0.273889	1.05882	0.0571584
275988	29	41	1	1	1	1	21.9261	0	0	0	0	0	0	0	1	0	0	0	0	0	0	1.43	1.53	0.6	0.91	1.58	1.37	12	12	12	16	16	16	1.45918	0.377877	1.59375	0.46609	0.6	-0.510826	0.919192	-0.0842603	1.59596	0.467475	1.35644	0.30486
275989	29	39	0	1	1	1	22.0604	0	0	0	0	0	0	0	0	0	0	0	0	0	0	0.77	2.5	1.1	0.72	0.99	1.44	13	13	13	16	16	16	0.785714	-0.241162	2.60417	0.957113	1.1	0.0953102	0.727273	-0.318454	1	0	1.42574	0.354693
275579	30	38	0	1	1	1	24.4899	0	1	1	1	0	0	0	0	1	0	1	0	0	0	0.45	0.34	0.8	1.04	0.57	1.01	12	12	12	16	16	16	0.459184	-0.778305	0.354167	-1.03799	0.8	-0.223144	1.05051	0.049271	0.575758	-0.552069	1	0
63661	32	40	1	1	1	1	33.2174	0	1	1	1	0	0	0	0	1	0	1	0	0	0	0.73	0.93	0.8	1.35	1.13	1.19	14	14	14	19	19	19	0.695238	-0.363501	1	0	0.8	-0.223144	1.36364	0.310155	1.15306	0.14242	1.14423	0.134733
278015	31	33	0	1	0	1	21.0772	0	0	0	1	1	1	1	0	0	0	1	0	0	0	0.3	1.97	1.1	0.75	1.77	0.96	12	12	12	16	16	16	0.306122	-1.18377	2.05208	0.718856	1.1	0.0953102	0.757576	-0.277632	1.78788	0.58103	0.950495	-0.0507723
278041	32	39	1	1	0	1	22.5896	0	1	0	0	0	0	0	0	0	0	0	0	0	0	2.29	1.55	0.7	1.09	0.97	1.3	12	12	12	17	17	17	2.33673	0.848755	1.61458	0.479077	0.7	-0.356675	1.10101	0.096228	1.01042	0.0103628	1.27451	0.242562
197957	28	40	0	0	0	0	21.0828	0	1	1	1	0	0	0	0	0	0	0	0	0	0	1.38	0.68	0.9	0.73	0.5	0.8	12	12	12	16	16	16	1.40816	0.342286	0.708333	-0.34484	0.9	-0.105361	0.737374	-0.30466	0.505051	-0.683097	0.792079	-0.233094
127952	36	37	1	0	1	1	19.8413	0	1	0	0	0	0	0	0	0	0	0	0	0	0	0.83	0.89	1	0.83	0.72	1.26	11	11	11	16	16	16	0.873684	-0.135036	0.908163	-0.0963311	1	0	0.838384	-0.176279	0.727273	-0.318454	1.24752	0.221161
276411	23	40	0	1	1	1	17.782	0	0	0	1	0	0	0	0	0	0	0	0	0	0	0.75	0.28	0.8	1.05	0.32	1.83	13	13	13	18	18	18	0.765306	-0.267479	0.291667	-1.23214	0.8	-0.223144	1.06061	0.0588405	0.340426	-1.07756	1.74286	0.555526
275869	25	39	0	1	0	0	24.6548	0	0	0	0	0	0	0	0	0	0	1	0	0	0	1.25	1.38	0.7	0.81	0.83	0.93	14	14	14	18	18	18	1.19048	0.174353	1.48387	0.394654	0.7	-0.356675	0.818182	-0.200671	0.882979	-0.124454	0.885714	-0.121361
215285	32	36	0	1	1	0	24.4646	0	1	1	1	1	0	1	0	0	0	0	0	0	0	1	1.02	1	0.88	1	1.36	13	13	13	17	17	17	1.02041	0.0202027	1.0625	0.0606246	1	0	0.888889	-0.117783	1.04167	0.040822	1.33333	0.287682
276988	29	40	1	1	0	0	23.1916	0	1	0	0	0	0	0	0	1	0	0	0	0	0	0.74	0.58	1.1	0.7	1	0.69	12	12	12	17	17	17	0.755102	-0.280902	0.604167	-0.503905	1.1	0.0953102	0.707071	-0.346625	1.04167	0.040822	0.676471	-0.390866
277010	32	39	0	1	1	1	22.2656	0	1	0	0	0	0	0	0	0	0	1	0	0	0	0.67	1.61	1	0.72	0.73	0.94	12	12	12	18	18	18	0.683673	-0.380275	1.67708	0.517056	1	0	0.727273	-0.318454	0.776596	-0.252835	0.895238	-0.110666
276924	24	38	1	1	1	1	19.8686	0	0	1	1	0	0	0	0	0	0	1	0	0	0	0.64	1.43	1.1	0.99	1.21	1.31	12	12	12	16	16	16	0.653061	-0.426084	1.48958	0.398496	1.1	0.0953102	1	0	1.22222	0.200671	1.29703	0.260077
197935	24	40	0	1	0	0	22.1118	0	1	0	0	0	0	0	0	0	0	0	0	0	0	0.9	2.33	1	0.84	1.58	1.12	12	12	12	17	17	17	0.918367	-0.0851578	2.42708	0.88669	1	0	0.848485	-0.164303	1.64583	0.498247	1.09804	0.0935261
214271	30	39	0	1	1	1	21.0962	0	1	1	0	0	0	0	0	0	0	0	0	0	0	0.3	1.92	1	0.7	2.24	1.2	12	12	12	17	17	17	0.306122	-1.18377	2	0.693147	1	0	0.707071	-0.346625	2.33333	0.847298	1.17647	0.162519
277283	24	36	1	1	0	1	17.2077	0	0	0	1	1	0	1	0	0	0	0	0	0	0	1.69	0.55	0.8	0.71	0.48	1.31	12	12	12	16	16	16	1.72449	0.544931	0.572917	-0.557015	0.8	-0.223144	0.717172	-0.33244	0.484848	-0.723919	1.29703	0.260077
275598	23	39	1	1	1	1	18.75	0	0	0	0	0	0	0	0	0	0	1	0	0	0	0.58	1.24	1	1.52	0.78	0.95	13	13	13	17	17	17	0.591837	-0.524524	1.29167	0.255933	1	0	1.53535	0.428761	0.8125	-0.207639	0.931373	-0.0710959
265820	33	40	0	1	0	0	20.83	0	0	0	0	0	0	0	0	0	0	1	0	0	0	2.51	0.84	1.1	0.83	0.82	1.45	12	12	12	17	17	17	2.56122	0.940485	0.875	-0.133531	1.1	0.0953102	0.838384	-0.176279	0.854167	-0.157629	1.42157	0.351761
245425	28	40	0	1	1	1	19.257	0	1	0	0	0	0	0	0	0	0	0	0	0	0	0.45	0.91	0.9	1.25	1.21	1.25	14	14	14	18	18	18	0.428571	-0.847298	0.978495	-0.02174	0.9	-0.105361	1.26263	0.233194	1.28723	0.252496	1.19048	0.174353
276846	31	39	0	1	1	1	18.026	0	1	0	0	0	0	0	0	1	0	0	0	0	0	1.52	0.35	1	0.71	0.2	1.02	13	13	13	17	17	17	1.55102	0.438913	0.364583	-1.009	1	0	0.717172	-0.33244	0.208333	-1.56862	1	0
184125	33	40	0	1	1	1	23.0112	0	1	0	0	0	0	0	0	0	0	0	0	0	0	1.2	0.32	0.8	0.95	0.41	1.14	12	12	12	16	16	16	1.22449	0.202524	0.333333	-1.09861	0.8	-0.223144	0.959596	-0.041243	0.414141	-0.881548	1.12871	0.121078
276518	32	38	0	1	1	0	19.5717	0	1	1	0	0	0	0	0	0	0	1	0	0	0	1.11	0.87	0.7	1.1	0.42	1.01	12	12	12	16	16	16	1.13265	0.124563	0.90625	-0.0984401	0.7	-0.356675	1.11111	0.105361	0.424242	-0.85745	1	0
276553	31	39	1	1	1	1	20.8889	0	1	0	1	0	0	0	0	1	0	0	0	0	0	1.9	2.29	1.4	1.07	1.28	1.38	12	12	12	17	17	17	1.93878	0.662057	2.38542	0.869374	1.4	0.336472	1.08081	0.077709	1.33333	0.287682	1.35294	0.302281
276580	35	40	0	1	1	1	21.3599	0	1	0	0	0	0	0	0	0	0	0	0	0	0	3.26	2.03	1.1	1.1	1.07	1.39	12	12	12	16	16	16	3.32653	1.20193	2.11458	0.748858	1.1	0.0953102	1.11111	0.105361	1.08081	0.077709	1.37624	0.319353
277062	25	40	1	1	0	1	22.7444	0	0	0	0	0	0	0	0	0	0	0	0	0	0	1.7	2.07	1	1.32	2.31	1.36	13	13	13	17	17	17	1.73469	0.550831	2.15625	0.768371	1	0	1.33333	0.287682	2.40625	0.87807	1.33333	0.287682
277069	31	40	1	1	1	1	18.1075	0	1	0	0	0	0	0	0	0	0	0	0	0	0	1.01	2.6	1.1	1.14	3.17	0.94	12	12	12	16	16	16	1.03061	0.030153	2.70833	0.996333	1.1	0.0953102	1.15152	0.141079	3.20202	1.16378	0.930693	-0.0718257
276621	31	38	0	1	1	1	24.4352	0	0	1	0	0	0	0	0	0	0	0	0	0	0	0.93	1.07	1.2	0.66	0.98	1.46	13	13	13	17	17	17	0.94898	-0.052368	1.11458	0.108481	1.2	0.182322	0.666667	-0.405465	1.02083	0.0206193	1.43137	0.358634
182177	39	40	1	1	0	0	26.6667	0	1	0	1	0	0	0	0	0	0	1	0	0	0	0.65	0.36	1	1.25	0.37	0.79	13	13	13	16	16	16	0.663265	-0.41058	0.375	-0.980829	1	0	1.26263	0.233194	0.373737	-0.984202	0.782178	-0.245673
277371	27	41	0	1	1	1	19.0039	0	0	0	0	0	0	0	0	0	0	0	0	0	0	0.58	1.13	0.7	0.92	0.93	0.73	13	13	13	17	17	17	0.591837	-0.524524	1.17708	0.16304	0.7	-0.356675	0.929293	-0.0733313	0.96875	-0.0317487	0.715686	-0.334513
277424	26	40	0	1	1	0	22.5627	0	1	0	0	0	0	0	0	0	0	0	0	0	0	1.18	0.99	1	0.64	0.78	0.86	11	11	11	16	16	16	1.24211	0.216808	1.0102	0.0101524	1	0	0.646465	-0.436237	0.787879	-0.238411	0.851485	-0.160773
277350	25	36	1	1	1	1	24.281	0	0	0	1	1	0	1	0	0	0	0	0	0	0	0.98	0.96	0.7	0.66	0.76	1.1	12	12	12	17	17	17	1	0	1	0	0.7	-0.356675	0.666667	-0.405465	0.791667	-0.233615	1.07843	0.0755076
275644	34	39	1	1	1	1	21.4949	0	0	1	1	0	0	0	0	0	0	0	0	0	0	1.5	1.02	0.9	0.99	1.2	1.4	13	13	13	16	16	16	1.53061	0.425668	1.0625	0.0606246	0.9	-0.105361	1	0	1.21212	0.192372	1.38614	0.326522
275676	26	39	0	1	1	0	22.0692	0	0	1	1	0	0	0	0	0	0	1	0	0	0	0.71	0.58	1.1	0.81	0.82	1.17	13	13	13	17	17	17	0.72449	-0.322288	0.604167	-0.503905	1.1	0.0953102	0.818182	-0.200671	0.854167	-0.157629	1.14706	0.137201
174737	28	40	1	1	1	1	24.2533	0	1	0	0	0	0	0	0	0	0	0	0	0	0	0.5	0.63	0.9	1.2	0.68	1.09	13	13	13	17	17	17	0.510204	-0.672944	0.65625	-0.421213	0.9	-0.105361	1.21212	0.192372	0.708333	-0.34484	1.06863	0.0663751
219482	33	39	1	1	1	1	22.137	0	1	0	0	0	0	0	0	1	0	0	0	0	0	0.97	1.71	1.4	0.88	1.42	1.27	13	13	13	16	16	16	0.989796	-0.0102565	1.78125	0.577315	1.4	0.336472	0.888889	-0.117783	1.43434	0.360707	1.25743	0.229067
277431	28	39	1	1	0	1	23.4375	0	0	0	0	0	0	0	0	0	0	1	0	0	0	0.61	0.41	1.1	1.37	0.63	0.9	13	13	13	17	17	17	0.622449	-0.474094	0.427083	-0.850776	1.1	0.0953102	1.38384	0.324861	0.65625	-0.421213	0.882353	-0.125163
277468	25	35	1	1	1	1	18.026	0	0	0	0	1	0	1	0	0	0	0	0	0	0	0.65	0.55	0.9	0.93	0.46	1.29	13	13	13	17	17	17	0.663265	-0.41058	0.572917	-0.557015	0.9	-0.105361	0.939394	-0.0625204	0.479167	-0.735707	1.26471	0.23484
277471	30	37	1	1	1	1	19.9792	0	0	0	0	0	0	0	0	0	0	0	0	0	0	1.54	0.84	1	1.3	0.62	1.09	12	12	12	16	16	16	1.57143	0.451985	0.875	-0.133531	1	0	1.31313	0.272415	0.626263	-0.467985	1.07921	0.0762274
276246	31	38	1	1	1	1	18.4375	0	0	0	0	0	0	0	0	0	0	0	0	0	0	0.97	0.45	1.1	1.1	0.34	1.04	13	13	13	17	17	17	0.989796	-0.0102565	0.46875	-0.757686	1.1	0.0953102	1.11111	0.105361	0.354167	-1.03799	1.01961	0.0194181
277848	30	38	1	1	1	0	20.4503	0	1	1	0	0	0	0	0	0	0	0	0	0	0	0.96	1.38	1	0.91	1.09	1.25	12	12	12	16	16	16	0.979592	-0.0206193	1.4375	0.362905	1	0	0.919192	-0.0842603	1.10101	0.096228	1.23762	0.213193
277865	28	40	1	1	1	0	21.4844	0	0	0	0	0	0	0	0	0	0	0	0	0	0	0.85	1.51	1.1	0.87	2.82	0.7	12	12	12	16	16	16	0.867347	-0.142316	1.57292	0.452932	1.1	0.0953102	0.878788	-0.129212	2.84848	1.04679	0.693069	-0.366625
183624	30	38	1	1	1	0	23.845	0	1	0	0	0	0	0	0	0	0	0	0	0	0	0.25	0.95	0.6	1.73	1.22	0.89	12	12	12	17	17	17	0.255102	-1.36609	0.989583	-0.0104713	0.6	-0.510826	1.74747	0.558172	1.27083	0.239673	0.872549	-0.136336
277911	27	41	1	1	0	1	18.902	0	0	1	0	0	0	0	0	0	0	0	0	0	0	1.74	1.69	0.9	0.9	1.33	0.86	14	14	14	18	18	18	1.65714	0.505095	1.8172	0.597299	0.9	-0.105361	0.909091	-0.0953102	1.41489	0.347054	0.819048	-0.199613
175478	26	40	0	1	0	0	17.6309	0	1	0	0	0	0	0	0	0	0	0	0	0	0	0.54	0.93	1.1	1.54	1.04	1.21	13	13	13	17	17	17	0.55102	-0.595983	0.96875	-0.0317487	1.1	0.0953102	1.55556	0.441833	1.08333	0.0800427	1.18627	0.170818
276114	33	40	0	1	0	0	22.1893	0	0	0	0	0	0	0	1	0	0	0	0	0	0	2.46	0.73	1.2	1.54	0.58	1.02	12	12	12	16	16	16	2.5102	0.920364	0.760417	-0.273889	1.2	0.182322	1.55556	0.441833	0.585859	-0.534677	1.0099	0.0098523
276190	28	39	1	1	1	1	22.6811	0	1	0	1	0	0	0	0	1	0	0	0	0	0	0.93	0.85	1	1.88	0.77	0.77	12	12	12	17	17	17	0.94898	-0.052368	0.885417	-0.121697	1	0	1.89899	0.641322	0.802083	-0.220543	0.754902	-0.281167
275732	28	40	1	1	1	0	16.2704	0	0	0	0	0	0	0	0	0	0	0	0	0	0	0.68	0.71	0.8	0.8	0.88	1.27	14	14	14	17	17	17	0.647619	-0.434453	0.763441	-0.26992	0.8	-0.223144	0.808081	-0.213093	0.916667	-0.0870114	1.2451	0.219214
166214	28	40	1	1	0	1	20.9572	0	1	0	1	0	0	0	0	0	0	0	0	0	0	1.14	0.59	1.1	0.82	0.48	1.12	13	13	13	17	17	17	1.16327	0.151231	0.614583	-0.486811	1.1	0.0953102	0.828283	-0.188401	0.5	-0.693147	1.09804	0.0935261
276342	32	40	0	1	1	0	20.3223	0	1	0	0	0	0	0	0	0	0	0	0	0	0	0.99	2.06	0.6	1.02	1.74	1.43	13	13	13	16	16	16	1.0102	0.0101524	2.14583	0.763528	0.6	-0.510826	1.0303	0.029853	1.75758	0.563935	1.41584	0.347724
209761	30	41	0	1	1	1	24.6094	0	0	1	0	0	0	0	0	0	0	0	0	0	0	1.89	1.41	1	2.05	2.17	1.23	12	12	12	16	16	16	1.92857	0.65678	1.46875	0.384412	1	0	2.07071	0.72789	2.19192	0.784778	1.21782	0.197064
193206	22	39	1	1	1	1	18.433	0	1	0	0	0	0	0	0	0	0	0	0	0	0	0.41	1.72	0.9	0.93	1.75	0.9	12	12	12	17	17	17	0.418367	-0.871395	1.79167	0.583146	0.9	-0.105361	0.939394	-0.0625204	1.82292	0.600438	0.882353	-0.125163
225600	31	40	1	1	1	1	22.8625	0	1	0	0	0	0	0	0	1	0	0	0	0	0	1.68	1.63	1	1.36	1.47	0.85	14	14	14	19	19	19	1.6	0.470004	1.75269	0.561151	1	0	1.37374	0.317535	1.5	0.405465	0.817308	-0.20174
183878	25	39	0	1	1	1	31.2175	1	1	1	1	0	0	0	0	1	0	1	0	0	0	0.94	0.73	0.5	1.09	1.28	0.83	12	12	12	16	16	16	0.959184	-0.0416727	0.760417	-0.273889	0.5	-0.693147	1.10101	0.096228	1.29293	0.25691	0.821782	-0.19628
276313	27	40	0	1	1	1	19.3962	0	0	1	0	0	0	0	0	0	0	1	0	0	0	0.68	0.54	1.1	0.88	0.51	1.07	13	13	13	18	18	18	0.693878	-0.36546	0.5625	-0.575364	1.1	0.0953102	0.888889	-0.117783	0.542553	-0.611469	1.01905	0.0188685
276317	22	38	1	1	0	1	16.6667	0	0	0	0	0	0	0	0	0	0	0	0	0	0	1.17	2.13	1.2	0.59	1.63	0.86	12	12	12	17	17	17	1.19388	0.177206	2.21875	0.796944	1.2	0.182322	0.59596	-0.517582	1.69792	0.529402	0.843137	-0.170626
242243	28	40	1	1	0	0	23.4375	0	1	1	1	0	0	0	0	0	0	0	0	0	0	1.81	0.68	0.9	1.21	0.41	1.61	13	13	13	17	17	17	1.84694	0.61353	0.708333	-0.34484	0.9	-0.105361	1.22222	0.200671	0.427083	-0.850776	1.57843	0.456432
277181	28	40	1	1	1	1	20.8229	0	0	0	0	0	0	0	0	0	0	0	0	1	0	1.44	1.36	0.9	1	1.71	0.79	12	12	12	16	16	16	1.46939	0.384846	1.41667	0.348307	0.9	-0.105361	1.0101	0.0100503	1.72727	0.546544	0.782178	-0.245673
277188	29	37	0	1	1	1	21.6263	0	0	1	0	0	0	0	0	0	0	0	0	0	0	0.72	0.47	1.3	1.09	0.72	0.83	13	13	13	17	17	17	0.734694	-0.308301	0.489583	-0.714201	1.3	0.262364	1.10101	0.096228	0.75	-0.287682	0.813725	-0.206132
277989	25	40	1	1	1	0	18.5826	0	0	1	1	0	0	0	0	0	0	0	0	0	0	1.77	1.25	1	0.77	1.33	1	13	13	13	17	17	17	1.80612	0.591182	1.30208	0.263966	1	0	0.777778	-0.251314	1.38542	0.326001	0.980392	-0.0198026
278001	31	39	0	1	1	1	17.6	0	1	0	0	0	0	0	0	1	0	0	0	0	0	1.62	1.22	1	1.33	1.5	1.51	13	13	13	17	17	17	1.65306	0.502629	1.27083	0.239673	1	0	1.34343	0.295229	1.5625	0.446287	1.48039	0.392307
278014	29	39	0	1	1	1	17.9688	0	0	0	0	0	0	0	0	0	0	0	0	0	0	0.92	1.35	1	0.93	1.31	1.41	13	13	13	17	17	17	0.938776	-0.0631789	1.40625	0.340927	1	0	0.939394	-0.0625204	1.36458	0.310849	1.38235	0.323787
278273	23	40	0	1	0	1	16.7319	0	0	0	1	0	0	0	0	0	0	0	0	0	0	1.12	1.5	1.4	1.19	1.04	1.5	12	12	12	16	16	16	1.14286	0.133531	1.5625	0.446287	1.4	0.336472	1.20202	0.184004	1.05051	0.049271	1.48515	0.395515
278320	34	40	0	1	0	1	25.0995	0	1	1	1	0	0	0	0	0	0	1	0	0	0	1.14	0.78	1	0.85	1.04	0.98	13	13	13	17	17	17	1.16327	0.151231	0.8125	-0.207639	1	0	0.858586	-0.152469	1.08333	0.0800427	0.960784	-0.0400053
276386	33	37	0	1	1	1	22.151	0	1	0	0	0	0	0	0	0	0	0	0	0	0	1.19	0.31	1.1	1.58	0.36	0.98	12	12	12	16	16	16	1.21429	0.194156	0.322917	-1.13036	1.1	0.0953102	1.59596	0.467475	0.363636	-1.0116	0.970297	-0.030153
242825	29	40	1	1	1	0	22.7615	0	1	1	1	0	0	0	0	0	0	0	0	0	0	0.7	0.56	1	0.81	0.52	0.79	13	13	13	17	17	17	0.714286	-0.336472	0.583333	-0.538997	1	0	0.818182	-0.200671	0.541667	-0.613104	0.77451	-0.255525
217914	26	41	0	1	0	0	22.1453	0	1	1	1	0	0	0	0	0	0	0	0	0	0	1.89	1.43	1.3	1.25	1.13	0.98	13	13	13	17	17	17	1.92857	0.65678	1.48958	0.398496	1.3	0.262364	1.26263	0.233194	1.17708	0.16304	0.960784	-0.0400053
193416	31	41	0	1	0	0	20.0474	0	1	1	1	0	0	0	0	0	0	0	0	0	0	0.95	2.11	0.9	1.39	1.8	0.95	12	12	12	16	16	16	0.969388	-0.0310906	2.19792	0.78751	0.9	-0.105361	1.40404	0.339354	1.81818	0.597837	0.940594	-0.0612436
276214	27	39	1	1	1	1	21.573	0	1	0	0	0	0	0	0	0	0	1	0	0	0	1.1	1.57	1.1	1.15	3.2	0.63	12	12	12	17	17	17	1.12245	0.115513	1.63542	0.491898	1.1	0.0953102	1.16162	0.149812	3.33333	1.20397	0.617647	-0.481838
276387	29	40	0	1	0	1	20.8117	0	0	1	1	0	0	0	0	0	0	0	0	0	0	1.17	1.35	0.9	1.19	2.41	1.21	12	12	12	16	16	16	1.19388	0.177206	1.40625	0.340927	0.9	-0.105361	1.20202	0.184004	2.43434	0.889677	1.19802	0.18067
276903	28	40	0	1	0	0	22.5922	0	1	1	1	0	0	0	0	0	0	1	0	0	0	3.38	1.48	0.9	1.43	1.05	1.84	13	13	13	18	18	18	3.44898	1.23808	1.54167	0.432864	0.9	-0.105361	1.44444	0.367725	1.11702	0.110666	1.75238	0.560975
276974	28	38	1	1	1	1	19.563	0	0	0	0	0	0	0	0	0	0	0	0	0	0	2.09	0.83	1	1.5	1.09	0.77	13	13	13	17	17	17	2.13265	0.757367	0.864583	-0.145508	1	0	1.51515	0.415515	1.13542	0.127	0.754902	-0.281167
238383	25	39	0	1	1	1	16.8663	0	0	0	0	0	0	0	0	0	0	0	0	0	0	1.17	0.59	1.5	1.01	0.61	0.73	12	12	12	18	18	18	1.19388	0.177206	0.614583	-0.486811	1.5	0.405465	1.0202	0.0200007	0.648936	-0.432421	0.695238	-0.363501
277779	22	39	0	1	0	1	17.6254	0	0	0	0	0	0	0	0	0	0	0	0	0	0	0.64	1.39	0.6	0.91	1.71	0.78	13	13	13	18	18	18	0.653061	-0.426084	1.44792	0.370126	0.6	-0.510826	0.919192	-0.0842603	1.81915	0.598369	0.742857	-0.297252
276339	28	37	0	1	1	1	18.3655	0	0	0	1	0	0	0	0	0	0	0	0	0	0	1.08	1.69	1.1	1.4	1.44	1.23	12	12	12	16	16	16	1.10204	0.0971637	1.76042	0.565551	1.1	0.0953102	1.41414	0.346523	1.45455	0.374693	1.21782	0.197064
277281	23	39	1	1	1	1	22.3315	0	0	0	0	0	0	0	0	0	0	0	0	0	0	0.51	0.85	1.1	0.92	0.89	1.45	13	13	13	17	17	17	0.520408	-0.653142	0.885417	-0.121697	1.1	0.0953102	0.929293	-0.0733313	0.927083	-0.0757118	1.42157	0.351761
277292	26	38	0	1	0	1	22.2685	0	0	0	0	0	0	0	0	0	0	0	0	0	0	0.8	1.41	1.2	1.07	1.15	0.89	13	13	13	17	17	17	0.816327	-0.202941	1.46875	0.384412	1.2	0.182322	1.08081	0.077709	1.19792	0.180584	0.872549	-0.136336
277366	23	39	0	1	1	1	19.2277	0	0	0	0	0	0	0	0	0	0	0	0	0	0	1.16	0.46	1	1.34	0.47	1.21	12	12	12	16	16	16	1.18367	0.168623	0.479167	-0.735707	1	0	1.35354	0.30272	0.474747	-0.744972	1.19802	0.18067
163251	37	40	1	0	0	0	20.1348	0	1	0	1	0	0	0	0	0	0	0	0	0	0	0.54	0.7	1.2	1.2	0.84	1.24	13	13	13	16	16	16	0.55102	-0.595983	0.729167	-0.315853	1.2	0.182322	1.21212	0.192372	0.848485	-0.164303	1.22772	0.205161
277831	30	39	0	1	1	1	23.2917	0	1	0	0	0	0	0	0	0	0	0	0	0	0	0.49	1.14	1.3	1.25	1.13	1.02	13	13	13	17	17	17	0.5	-0.693147	1.1875	0.17185	1.3	0.262364	1.26263	0.233194	1.17708	0.16304	1	0
278054	34	38	0	1	1	1	20.3223	0	0	0	0	0	0	0	1	0	0	1	0	0	0	1.27	0.85	1.1	1.12	0.89	0.89	12	12	12	16	16	16	1.29592	0.25922	0.885417	-0.121697	1.1	0.0953102	1.13131	0.123379	0.89899	-0.106483	0.881188	-0.126484
270920	27	40	0	1	1	1	20.1087	0	0	0	1	0	0	0	1	0	0	0	0	0	0	0.67	0.52	1	0.93	0.43	1.38	12	12	12	16	16	16	0.683673	-0.380275	0.541667	-0.613104	1	0	0.939394	-0.0625204	0.434343	-0.83392	1.36634	0.312133
276110	32	39	0	1	1	1	30.863	0	1	1	1	0	0	0	0	0	0	1	0	0	0	0.77	0.47	0.8	1.36	0.82	1.18	13	13	13	19	19	19	0.785714	-0.241162	0.489583	-0.714201	0.8	-0.223144	1.37374	0.317535	0.836735	-0.178248	1.13462	0.126294
276120	30	40	1	1	1	1	19.8286	0	0	1	0	0	0	0	0	0	0	0	0	0	0	1.39	1.1	0.6	1.43	1.07	1.39	13	13	13	17	17	17	1.41837	0.349506	1.14583	0.136132	0.6	-0.510826	1.44444	0.367725	1.11458	0.108481	1.36275	0.309501
276125	26	39	1	1	1	1	16.7311	0	1	0	0	0	0	0	0	0	0	0	0	0	0	0.53	0.89	0.8	1.6	0.77	0.9	12	12	12	17	17	17	0.540816	-0.614676	0.927083	-0.0757118	0.8	-0.223144	1.61616	0.480054	0.802083	-0.220543	0.882353	-0.125163
276261	35	39	1	1	1	0	24.8358	0	1	0	0	0	0	0	0	1	0	1	0	0	0	1.34	0.55	0.9	1.32	0.47	1.21	12	12	12	16	16	16	1.36735	0.312872	0.572917	-0.557015	0.9	-0.105361	1.33333	0.287682	0.474747	-0.744972	1.19802	0.18067
277068	22	39	0	1	0	0	20.83	0	0	0	1	0	0	0	0	0	0	0	0	0	0	0.27	0.5	1.1	1.64	0.84	0.64	13	13	13	17	17	17	0.27551	-1.28913	0.520833	-0.652325	1.1	0.0953102	1.65657	0.504747	0.875	-0.133531	0.627451	-0.46609
277089	31	39	0	1	1	1	22.231	0	1	0	0	0	0	0	0	0	0	0	0	0	0	1.43	1.18	0.6	0.95	0.78	0.75	13	13	13	17	17	17	1.45918	0.377877	1.22917	0.206336	0.6	-0.510826	0.959596	-0.041243	0.8125	-0.207639	0.735294	-0.307485
277828	26	38	1	1	1	0	18.0662	0	0	1	1	0	0	0	0	0	0	0	0	0	0	0.51	0.55	1.2	0.87	0.62	0.91	13	13	13	16	16	16	0.520408	-0.653142	0.572917	-0.557015	1.2	0.182322	0.878788	-0.129212	0.626263	-0.467985	0.90099	-0.104261
277832	26	40	1	1	0	1	19.563	0	0	1	1	0	0	0	0	0	0	0	0	0	0	1.07	0.73	0.6	1.03	0.71	1	13	13	13	17	17	17	1.09184	0.0878614	0.760417	-0.273889	0.6	-0.510826	1.0404	0.0396091	0.739583	-0.301668	0.980392	-0.0198026
277839	29	40	1	1	1	1	21.4844	0	1	0	0	0	0	0	0	0	0	0	0	0	0	0.84	1.14	1	1.08	0.96	1.5	12	12	12	16	16	16	0.857143	-0.154151	1.1875	0.17185	1	0	1.09091	0.0870114	0.969697	-0.0307717	1.48515	0.395515
277853	28	40	0	1	0	1	20.4497	0	1	1	0	0	0	0	0	0	0	1	0	0	0	1.36	0.81	0.9	0.83	1.04	1.22	12	12	12	16	16	16	1.38776	0.327687	0.84375	-0.169899	0.9	-0.105361	0.838384	-0.176279	1.05051	0.049271	1.20792	0.188901
204079	35	39	0	1	1	1	20.1337	0	1	0	0	0	0	0	0	1	0	0	0	0	0	1.28	0.96	1	1.26	0.91	0.97	13	13	13	17	17	17	1.30612	0.267063	1	0	1	0	1.27273	0.241162	0.947917	-0.0534887	0.95098	-0.0502618
278092	27	40	0	1	1	1	20.3954	0	0	1	1	0	0	0	0	0	0	0	0	0	0	0.64	0.39	1.1	1.01	0.62	0.81	14	14	14	18	18	18	0.609524	-0.495077	0.419355	-0.869038	1.1	0.0953102	1.0202	0.0200007	0.659574	-0.41616	0.771429	-0.259511
257920	29	40	1	1	1	1	22.3133	0	0	0	0	0	0	0	0	0	0	0	0	0	0	0.84	1.37	0.8	1.23	0.83	1.1	12	12	12	17	17	17	0.857143	-0.154151	1.42708	0.355633	0.8	-0.223144	1.24242	0.217065	0.864583	-0.145508	1.07843	0.0755076
278097	31	38	1	1	1	1	20.7031	0	1	1	1	0	0	0	0	0	0	0	0	0	0	0.81	1.11	1.2	1.11	1.06	0.92	13	13	13	17	17	17	0.826531	-0.190518	1.15625	0.145182	1.2	0.182322	1.12121	0.11441	1.10417	0.0990909	0.901961	-0.103184
276929	29	39	1	1	1	0	17.4856	0	1	0	0	0	0	0	0	0	0	0	0	0	0	0.82	0.91	1.2	0.82	0.82	1.14	13	13	13	17	17	17	0.836735	-0.178248	0.947917	-0.0534887	1.2	0.182322	0.828283	-0.188401	0.854167	-0.157629	1.11765	0.111226
94125	35	37	1	1	1	0	29.4688	0	1	0	0	0	0	0	0	1	0	1	0	0	0	0.6	1.43	0.9	1.83	1.85	0.78	12	12	12	16	16	16	0.612245	-0.490623	1.48958	0.398496	0.9	-0.105361	1.84848	0.614366	1.86869	0.625236	0.772277	-0.258412
276955	30	39	1	1	1	0	24.0079	0	0	0	0	0	0	0	0	1	0	0	0	0	0	1.66	0.92	1.5	0.98	0.75	1.09	12	12	12	16	16	16	1.69388	0.52702	0.958333	-0.0425596	1.5	0.405465	0.989899	-0.0101524	0.757576	-0.277632	1.07921	0.0762274
276960	37	38	1	1	1	0	23.634	0	1	1	0	0	0	0	0	0	0	0	0	0	0	0.16	0.46	0.9	1.24	0.8	1.06	12	12	12	16	16	16	0.163265	-1.81238	0.479167	-0.735707	0.9	-0.105361	1.25253	0.225162	0.808081	-0.213093	1.0495	0.0483186
195682	29	39	0	1	1	1	18.3594	0	1	0	0	0	0	0	0	0	0	0	0	0	0	0.46	1.18	0.7	0.93	0.62	1	13	13	13	18	18	18	0.469388	-0.756326	1.22917	0.206336	0.7	-0.356675	0.939394	-0.0625204	0.659574	-0.41616	0.952381	-0.0487902
276969	28	38	1	1	1	1	18.369	0	0	0	0	0	0	0	0	0	0	1	0	0	0	0.51	0.37	1	0.93	0.52	1.63	12	12	12	16	16	16	0.520408	-0.653142	0.385417	-0.95343	1	0	0.939394	-0.0625204	0.525253	-0.643876	1.61386	0.47863
275861	22	40	1	1	0	1	17.6693	0	0	0	0	0	0	0	0	0	0	0	0	0	0	0.84	1.67	0.9	0.92	1.79	1.17	14	14	14	18	18	18	0.8	-0.223144	1.7957	0.585394	0.9	-0.105361	0.929293	-0.0733313	1.90426	0.644091	1.11429	0.108214
277162	33	41	0	1	1	1	19.6539	0	0	0	0	0	0	0	0	0	0	0	0	0	0	1.09	0.64	1.2	0.81	0.8	0.96	13	13	13	16	16	16	1.11224	0.10638	0.666667	-0.405465	1.2	0.182322	0.818182	-0.200671	0.808081	-0.213093	0.950495	-0.0507723
169124	27	37	1	1	0	1	20.2291	0	1	1	1	0	0	0	0	0	0	0	0	0	0	1.18	0.46	0.6	1.11	1.07	1.1	11	11	11	16	16	16	1.24211	0.216808	0.469388	-0.756326	0.6	-0.510826	1.12121	0.11441	1.08081	0.077709	1.08911	0.0853598
276115	26	40	0	1	1	1	20.202	0	0	0	1	0	0	0	0	0	0	0	0	0	0	1.57	1.54	0.7	0.9	1.64	1.12	13	13	13	19	19	19	1.60204	0.471278	1.60417	0.472604	0.7	-0.356675	0.909091	-0.0953102	1.67347	0.514899	1.07692	0.074108
276126	23	38	0	1	1	0	18.1641	0	0	1	0	0	0	0	0	0	0	0	0	0	0	0.74	0.63	1.3	0.77	0.31	0.89	12	12	12	16	16	16	0.755102	-0.280902	0.65625	-0.421213	1.3	0.262364	0.777778	-0.251314	0.313131	-1.16113	0.881188	-0.126484
277168	39	39	0	1	1	1	22.5069	0	0	0	0	0	0	0	0	0	0	1	0	1	0	1.2	0.78	0.8	0.91	1.19	1.07	13	13	13	20	20	20	1.22449	0.202524	0.8125	-0.207639	0.8	-0.223144	0.90099	-0.104261	1.29348	0.257335	1	0
275992	30	39	1	1	0	1	25.2363	0	1	0	0	0	0	0	0	1	0	0	0	0	0	0.51	1.31	1	1.26	1.26	1.07	12	12	12	18	18	18	0.520408	-0.653142	1.36458	0.310849	1	0	1.27273	0.241162	1.34043	0.292987	1.01905	0.0188685
276006	25	40	1	1	1	0	19.1001	0	0	0	0	0	0	0	0	0	0	0	0	0	0	2.83	0.8	1	1.42	0.74	1.68	12	12	12	16	16	16	2.88776	1.06048	0.833333	-0.182322	1	0	1.43434	0.360707	0.747475	-0.291055	1.66337	0.508843
265563	26	38	1	1	1	0	20.5744	0	0	0	0	0	0	0	0	0	0	0	0	0	0	1.12	0.51	0.8	1.4	0.45	0.96	12	12	12	16	16	16	1.14286	0.133531	0.53125	-0.632523	0.8	-0.223144	1.41414	0.346523	0.454545	-0.788457	0.950495	-0.0507723
251221	26	40	0	1	0	1	18.5901	0	0	0	0	0	0	0	0	0	0	0	0	0	0	0.74	0.85	1	0.6	0.82	0.98	12	12	12	16	16	16	0.755102	-0.280902	0.885417	-0.121697	1	0	0.606061	-0.500775	0.828283	-0.188401	0.970297	-0.030153
279046	31	38	0	1	1	0	20.3428	0	1	0	0	0	0	0	0	0	0	0	0	0	0	1.18	0.9	1	1.31	1.15	0.88	12	12	12	16	16	16	1.20408	0.185717	0.9375	-0.0645385	1	0	1.32323	0.280077	1.16162	0.149812	0.871287	-0.137784
266103	29	38	0	1	1	1	19.3359	0	1	1	1	0	0	0	0	1	0	0	0	0	0	2.29	0.6	1.2	1.19	0.3	0.99	12	12	12	17	17	17	2.33673	0.848755	0.625	-0.470004	1.2	0.182322	1.20202	0.184004	0.3125	-1.16315	0.970588	-0.029853
128574	31	38	0	1	0	1	20.1087	0	1	1	0	0	0	0	0	1	0	0	0	0	0	0.82	0.42	1.1	1	0.37	1.11	13	13	13	16	16	16	0.836735	-0.178248	0.4375	-0.826679	1.1	0.0953102	1.0101	0.0100503	0.373737	-0.984202	1.09901	0.0944097
195133	29	39	1	1	1	1	19.5312	0	1	0	0	0	0	0	0	0	0	0	0	0	0	0.69	0.36	0.7	0.72	0.39	1.07	12	12	12	16	16	16	0.704082	-0.350861	0.375	-0.980829	0.7	-0.356675	0.727273	-0.318454	0.393939	-0.931558	1.05941	0.0577083
196563	26	40	1	1	1	1	17.9688	0	1	0	0	0	0	0	0	0	0	0	0	0	0	0.95	0.74	1	0.87	0.66	1.51	13	13	13	17	17	17	0.969388	-0.0310906	0.770833	-0.260283	1	0	0.878788	-0.129212	0.6875	-0.374693	1.48039	0.392307
264871	26	36	1	1	1	1	18.8189	0	0	0	0	1	0	1	0	0	0	0	0	0	0	2.08	2.75	1	1.11	1.45	1.05	12	12	12	16	16	16	2.12245	0.752571	2.86458	1.05242	1	0	1.12121	0.11441	1.46465	0.381614	1.0396	0.0388398
275901	25	40	0	1	1	0	19.4097	0	1	0	0	0	0	0	0	0	0	0	0	0	0	0.85	2.22	1.3	0.76	2.78	1.35	12	12	12	16	16	16	0.867347	-0.142316	2.3125	0.838329	1.3	0.262364	0.767677	-0.264387	2.80808	1.0325	1.33663	0.290154
275938	29	37	0	1	1	1	18.8634	0	0	0	0	0	0	0	0	0	0	0	0	0	0	2.41	2.36	1.4	1.03	1.99	1.16	13	13	13	17	17	17	2.45918	0.899829	2.45833	0.899484	1.4	0.336472	1.0404	0.0396091	2.07292	0.728957	1.13725	0.128617
263327	24	38	0	1	1	1	15.1796	0	0	0	1	0	0	0	0	0	0	0	0	0	0	0.79	0.67	0.9	1.27	0.93	0.96	12	12	12	16	16	16	0.806122	-0.21552	0.697917	-0.359656	0.9	-0.105361	1.28283	0.249067	0.939394	-0.0625204	0.950495	-0.0507723
277046	27	40	1	1	1	1	23.0112	0	0	0	0	0	0	0	0	0	0	0	0	0	0	0.83	1.13	1	1.45	1.42	1.05	12	12	12	16	16	16	0.846939	-0.166127	1.17708	0.16304	1	0	1.46465	0.381614	1.43434	0.360707	1.0396	0.0388398
80048	32	39	0	1	0	1	28	0	1	1	1	0	0	0	0	1	0	0	0	0	0	0.47	1.31	1.1	0.74	0.77	0.83	12	12	12	16	16	16	0.479592	-0.73482	1.36458	0.310849	1.1	0.0953102	0.747475	-0.291055	0.777778	-0.251314	0.821782	-0.19628
243586	39	37	0	1	0	1	17.9089	0	1	1	0	0	0	0	0	0	0	0	0	0	0	0.77	1.18	1	1.04	1.89	1.14	12	12	12	16	16	16	0.785714	-0.241162	1.22917	0.206336	1	0	1.05051	0.049271	1.90909	0.646627	1.12871	0.121078
243757	27	38	1	1	1	1	19.7055	0	0	1	1	0	0	0	0	0	0	1	0	0	0	0.8	1.29	1.2	1.43	1.3	0.78	12	12	12	17	17	17	0.816327	-0.202941	1.34375	0.295464	1.2	0.182322	1.44444	0.367725	1.35417	0.303186	0.764706	-0.268264
275719	26	41	0	1	1	0	22.0703	0	0	0	0	0	0	0	0	0	0	0	0	0	0	1.5	1.04	0.7	0.92	1.49	0.95	12	12	12	16	16	16	1.53061	0.425668	1.08333	0.0800427	0.7	-0.356675	0.929293	-0.0733313	1.50505	0.408826	0.940594	-0.0612436
110747	25	40	0	1	0	0	20.1951	0	1	1	1	0	0	0	0	1	0	0	0	0	0	1.7	1.74	0.7	1.19	1.06	0.96	12	12	12	16	16	16	1.73469	0.550831	1.8125	0.594707	0.7	-0.356675	1.20202	0.184004	1.07071	0.0683192	0.950495	-0.0507723
275733	29	39	0	1	1	1	17.8506	0	0	0	0	0	0	0	0	0	0	0	0	0	0	0.32	1.61	1.1	0.99	1.24	1	12	12	12	16	16	16	0.326531	-1.11923	1.67708	0.517056	1.1	0.0953102	1	0	1.25253	0.225162	0.990099	-0.00995033
280815	29	40	0	1	1	1	23.0681	0	0	1	0	0	0	0	0	0	0	0	0	0	0	1.23	1.35	1	0.83	1.18	1.13	12	12	12	17	17	17	1.2551	0.227217	1.40625	0.340927	1	0	0.838384	-0.176279	1.22917	0.206336	1.10784	0.102415
281729	26	39	1	1	1	1	17.6898	0	0	1	0	0	0	0	0	0	0	0	0	0	0	1.44	0.89	0.9	1.54	0.73	0.87	12	12	12	16	16	16	1.46939	0.384846	0.927083	-0.0757118	0.9	-0.105361	1.55556	0.441833	0.737374	-0.30466	0.861386	-0.149212
281793	26	41	0	1	1	1	18.3174	0	0	0	0	0	0	0	0	0	0	0	0	0	0	1.27	1.5	1.1	0.9	1.02	1.43	12	12	12	16	16	16	1.29592	0.25922	1.5625	0.446287	1.1	0.0953102	0.909091	-0.0953102	1.0303	0.029853	1.41584	0.347724
281817	29	39	0	1	1	1	23.2088	0	0	1	0	0	0	0	0	0	0	0	0	0	0	0.44	0.84	0.5	0.87	1.06	1.16	13	13	13	17	17	17	0.44898	-0.800778	0.875	-0.133531	0.5	-0.693147	0.878788	-0.129212	1.10417	0.0990909	1.13725	0.128617
283342	27	37	0	1	1	0	18.75	0	0	0	0	0	0	0	0	0	0	1	0	0	0	0.99	0.42	1	0.64	0.32	1.09	12	12	12	17	17	17	1.0102	0.0101524	0.4375	-0.826679	1	0	0.646465	-0.436237	0.333333	-1.09861	1.06863	0.0663751
215691	32	39	1	1	1	1	21.5139	0	1	0	0	0	0	0	0	0	0	1	0	0	0	0.76	0.49	0.8	0.77	0.34	1.26	12	12	12	16	16	16	0.77551	-0.254234	0.510417	-0.672528	0.8	-0.223144	0.777778	-0.251314	0.343434	-1.06876	1.24752	0.221161
282127	34	38	1	1	0	0	19.9219	0	1	0	0	0	0	0	0	0	0	0	0	1	0	1.94	2.51	1	1.08	1.95	1.29	13	13	13	17	17	17	1.97959	0.682891	2.61458	0.961105	1	0	1.09091	0.0870114	2.03125	0.708651	1.26471	0.23484
282128	37	38	1	1	1	0	23.9361	0	1	0	0	0	0	0	0	0	0	0	0	0	0	0.78	1.22	1	0.82	1.12	1.12	13	13	13	18	18	18	0.795918	-0.228259	1.27083	0.239673	1	0	0.828283	-0.188401	1.19149	0.175204	1.06667	0.0645385
285484	22	39	0	1	0	1	23.8054	0	0	0	1	0	0	0	0	0	0	1	0	0	0	0.44	0.61	0.9	0.7	0.56	1.14	12	12	12	17	17	17	0.44898	-0.800778	0.635417	-0.453474	0.9	-0.105361	0.707071	-0.346625	0.583333	-0.538997	1.11765	0.111226
117736	34	39	1	1	1	1	18.591	0	1	0	0	0	0	0	0	1	0	0	0	0	0	0.76	0.8	0.8	0.9	0.63	0.99	13	13	13	16	16	16	0.77551	-0.254234	0.833333	-0.182322	0.8	-0.223144	0.909091	-0.0953102	0.636364	-0.451985	0.980198	-0.0200007
170988	32	40	0	1	1	1	27.0051	0	1	1	1	0	0	0	0	0	0	0	0	0	0	0.73	0.69	0.8	0.81	0.89	1.13	12	12	12	16	16	16	0.744898	-0.294508	0.71875	-0.330242	0.8	-0.223144	0.818182	-0.200671	0.89899	-0.106483	1.11881	0.112267
283422	23	39	1	1	1	1	16.0156	0	0	0	1	0	0	0	0	0	0	0	0	0	0	0.64	1.57	0.9	1.03	1.72	1.08	13	13	13	17	17	17	0.653061	-0.426084	1.63542	0.491898	0.9	-0.105361	1.0404	0.0396091	1.79167	0.583146	1.05882	0.0571584
282410	29	39	1	1	1	1	22.1659	1	1	0	0	0	0	0	0	1	0	0	0	0	0	1.21	1.36	1.5	0.75	1.39	1	12	12	12	16	16	16	1.23469	0.210823	1.41667	0.348307	1.5	0.405465	0.757576	-0.277632	1.40404	0.339354	0.990099	-0.00995033
282434	31	40	1	1	1	0	22.7254	0	1	0	0	0	0	0	0	1	0	1	0	0	0	0.53	1.28	0.9	0.83	1.79	0.99	12	12	12	17	17	17	0.540816	-0.614676	1.33333	0.287682	0.9	-0.105361	0.838384	-0.176279	1.86458	0.623038	0.970588	-0.029853
282518	35	40	1	1	1	1	20.5688	0	1	0	0	0	0	0	0	0	0	0	0	0	0	0.41	0.63	1.2	1.56	0.88	1.04	13	13	13	17	17	17	0.418367	-0.871395	0.65625	-0.421213	1.2	0.182322	1.57576	0.454736	0.916667	-0.0870114	1.01961	0.0194181
282533	29	34	0	1	1	1	19.6283	0	0	0	0	1	0	1	0	0	0	0	0	1	0	1.38	0.55	1.1	0.69	0.33	1.13	12	12	12	17	17	17	1.40816	0.342286	0.572917	-0.557015	1.1	0.0953102	0.69697	-0.361013	0.34375	-1.06784	1.10784	0.102415
133174	33	39	1	1	1	1	19.2234	0	1	0	0	0	0	0	0	1	0	0	0	0	0	0.25	0.85	0.9	1.03	1.4	0.75	12	12	12	16	16	16	0.255102	-1.36609	0.885417	-0.121697	0.9	-0.105361	1.0404	0.0396091	1.41414	0.346523	0.742574	-0.297632
229318	29	39	1	1	1	1	26.1551	0	0	0	0	0	0	0	0	0	0	0	0	0	0	0.55	0.97	0.9	0.84	1.17	1.06	12	12	12	17	17	17	0.561224	-0.577634	1.01042	0.0103628	0.9	-0.105361	0.848485	-0.164303	1.21875	0.197826	1.03922	0.0384663
245959	27	39	0	1	1	1	25.2363	0	1	1	1	0	0	0	0	0	0	0	0	0	0	0.45	0.61	0.9	1.53	1.2	0.7	12	12	12	16	16	16	0.459184	-0.778305	0.635417	-0.453474	0.9	-0.105361	1.54545	0.435318	1.21212	0.192372	0.693069	-0.366625
231248	27	40	1	1	1	1	23.5847	0	1	1	1	0	0	0	0	0	0	1	0	0	0	0.69	0.34	0.9	0.69	0.39	1	13	13	13	17	17	17	0.704082	-0.350861	0.354167	-1.03799	0.9	-0.105361	0.69697	-0.361013	0.40625	-0.900787	0.980392	-0.0198026
280938	30	41	0	1	1	1	20.0288	0	1	0	0	0	0	0	0	0	0	1	0	0	0	0.61	0.55	0.9	1.29	0.96	0.84	12	12	12	17	17	17	0.622449	-0.474094	0.572917	-0.557015	0.9	-0.105361	1.30303	0.264693	1	0	0.823529	-0.194156
209658	27	39	0	1	1	1	15.9875	0	1	1	1	0	0	0	0	0	0	0	0	0	0	1.33	1.6	0.6	1.41	1.08	1.54	12	12	12	17	17	17	1.35714	0.305382	1.66667	0.510826	0.6	-0.510826	1.42424	0.35364	1.125	0.117783	1.5098	0.41198
135809	31	36	1	1	1	1	20.8247	0	1	0	0	1	0	1	0	0	0	0	0	0	0	0.81	0.73	0.8	1.5	0.58	1.07	13	13	13	17	17	17	0.826531	-0.190518	0.760417	-0.273889	0.8	-0.223144	1.51515	0.415515	0.604167	-0.503905	1.04902	0.047856
283023	30	40	0	1	1	0	18.0229	0	0	1	1	0	0	0	0	0	0	1	0	0	0	1.54	1.46	0.9	0.79	1.1	1.45	12	12	12	16	16	16	1.57143	0.451985	1.52083	0.419258	0.9	-0.105361	0.79798	-0.225672	1.11111	0.105361	1.43564	0.361613
233616	29	38	1	1	0	1	18.8189	0	1	1	1	0	0	0	0	1	0	0	0	0	0	0.65	0.7	0.9	1.08	1.01	1.15	13	13	13	17	17	17	0.663265	-0.41058	0.729167	-0.315853	0.9	-0.105361	1.09091	0.0870114	1.05208	0.0507723	1.12745	0.119959
282426	34	39	1	1	1	0	22.3133	0	1	1	0	0	0	0	0	0	0	1	0	0	0	0.6	0.83	1.5	1.01	0.42	1.18	12	12	12	17	17	17	0.612245	-0.490623	0.864583	-0.145508	1.5	0.405465	1.0202	0.0200007	0.4375	-0.826679	1.15686	0.145712
283083	31	41	0	1	0	1	22.0428	0	0	1	1	0	0	0	0	0	0	0	0	0	0	1.56	1.39	1.1	1.01	1.25	1.12	13	13	13	20	20	20	1.59184	0.464889	1.44792	0.370126	1.1	0.0953102	1	0	1.3587	0.306525	1.04673	0.04567
283480	28	38	1	1	1	1	20.2645	0	0	1	0	0	0	0	0	0	0	1	0	0	0	0.21	0.4	1.3	0.89	0.63	1.17	13	13	13	17	17	17	0.214286	-1.54045	0.416667	-0.875469	1.3	0.262364	0.89899	-0.106483	0.65625	-0.421213	1.14706	0.137201
283748	27	39	0	1	1	0	21.1203	0	0	0	0	0	0	0	0	0	0	0	0	0	0	1.53	1.01	1.1	1.06	1.61	0.98	13	13	13	18	18	18	1.56122	0.44547	1.05208	0.0507723	1.1	0.0953102	1.07071	0.0683192	1.71277	0.53811	0.933333	-0.0689929
281004	30	39	1	1	1	0	20.6131	0	1	1	0	0	0	0	0	0	0	1	0	0	0	1.27	0.45	1	1.37	0.47	1.2	12	12	12	17	17	17	1.29592	0.25922	0.46875	-0.757686	1	0	1.38384	0.324861	0.489583	-0.714201	1.17647	0.162519
281018	27	39	1	1	1	1	23.2577	0	0	1	0	0	0	0	0	0	0	0	0	0	0	1.59	0.79	1	0.72	0.96	1.57	13	13	13	17	17	17	1.62245	0.483937	0.822917	-0.1949	1	0	0.727273	-0.318454	1	0	1.53922	0.431273
281022	31	39	0	1	1	1	24.974	0	1	0	1	0	0	0	0	0	0	0	0	0	0	1.38	0.79	0.6	1.17	0.87	1.3	12	12	12	16	16	16	1.40816	0.342286	0.822917	-0.1949	0.6	-0.510826	1.18182	0.167054	0.878788	-0.129212	1.28713	0.252414
280430	27	39	1	1	1	0	18.5529	0	0	0	1	0	0	0	0	0	0	0	0	1	0	1.03	1.08	0.9	1.03	1.2	1.07	12	12	12	16	16	16	1.05102	0.0497615	1.125	0.117783	0.9	-0.105361	1.0404	0.0396091	1.21212	0.192372	1.05941	0.0577083
280441	32	40	1	1	1	1	22.6003	0	1	1	0	0	0	0	0	0	0	1	0	0	0	0.32	1.15	1	1.4	1.24	1.27	12	12	12	17	17	17	0.326531	-1.11923	1.19792	0.180584	1	0	1.41414	0.346523	1.29167	0.255933	1.2451	0.219214
239038	27	39	1	1	1	1	16.1247	0	0	0	0	0	0	0	0	0	0	0	0	0	0	0.42	0.72	0.9	0.88	0.35	1.49	12	12	12	16	16	16	0.428571	-0.847298	0.75	-0.287682	0.9	-0.105361	0.888889	-0.117783	0.353535	-1.03977	1.47525	0.388826
280949	23	39	1	1	0	0	17.6693	0	1	0	0	0	0	0	0	0	0	0	0	0	0	0.54	1.08	0.9	1.52	0.7	1.38	12	12	12	16	16	16	0.55102	-0.595983	1.125	0.117783	0.9	-0.105361	1.53535	0.428761	0.707071	-0.346625	1.36634	0.312133
279848	33	39	1	1	1	1	23.2335	0	1	1	0	0	0	0	0	1	0	0	0	0	0	1.18	2.52	1.1	1.14	2.83	1.08	13	13	13	17	17	17	1.20408	0.185717	2.625	0.965081	1.1	0.0953102	1.15152	0.141079	2.94792	1.0811	1.05882	0.0571584
281532	32	39	0	0	0	1	23.8751	0	0	1	0	0	0	0	0	0	0	0	0	0	0	2.46	2.29	0.9	0.9	2.26	1.28	12	12	12	17	17	17	2.5102	0.920364	2.38542	0.869374	0.9	-0.105361	0.909091	-0.0953102	2.35417	0.856187	1.2549	0.227057
281558	30	40	0	1	1	1	24.0346	0	0	0	0	0	0	0	0	0	0	0	0	0	0	0.99	0.8	0.9	1.28	1.17	1.56	12	12	12	17	17	17	1.0102	0.0101524	0.833333	-0.182322	0.9	-0.105361	1.29293	0.25691	1.21875	0.197826	1.52941	0.424883
281562	23	40	0	1	1	1	18.6709	0	1	0	0	0	0	0	0	0	0	0	0	0	0	0.33	0.58	0.8	0.98	1.02	1.02	14	14	14	18	18	18	0.314286	-1.15745	0.623656	-0.472156	0.8	-0.223144	0.989899	-0.0101524	1.08511	0.081678	0.971429	-0.0289875
282700	27	40	0	1	1	1	20.1733	0	0	1	1	0	0	0	0	0	0	0	0	0	0	1.81	1.48	1.3	0.78	1.11	0.76	13	13	13	17	17	17	1.84694	0.61353	1.54167	0.432864	1.3	0.262364	0.787879	-0.238411	1.15625	0.145182	0.745098	-0.294239
281830	22	41	0	1	0	0	20.0288	0	0	1	1	0	0	0	0	0	0	0	0	0	0	0.69	0.49	0.9	0.68	0.7	1.1	12	12	12	16	16	16	0.704082	-0.350861	0.510417	-0.672528	0.9	-0.105361	0.686869	-0.375612	0.707071	-0.346625	1.08911	0.0853598
279704	34	39	1	1	1	1	19.6283	0	1	0	0	0	0	0	0	1	0	1	0	0	0	0.8	0.69	1	1.76	0.97	1.26	12	12	12	16	16	16	0.816327	-0.202941	0.71875	-0.330242	1	0	1.77778	0.575364	0.979798	-0.0204089	1.24752	0.221161
242272	28	38	1	1	0	1	18.662	0	1	0	1	0	0	0	0	0	0	0	0	0	0	1.16	0.73	1	1.16	0.99	0.89	12	12	12	16	16	16	1.18367	0.168623	0.760417	-0.273889	1	0	1.17172	0.15847	1	0	0.881188	-0.126484
251163	28	35	0	1	1	1	16.6296	0	0	1	1	1	0	1	0	0	0	0	0	0	0	1.16	0.91	1.2	0.99	0.81	0.89	14	14	14	18	18	18	1.10476	0.0996298	0.978495	-0.02174	1.2	0.182322	1	0	0.861702	-0.148846	0.847619	-0.165324
282357	31	41	0	1	1	1	21.0956	0	0	0	0	0	0	0	0	0	0	0	0	0	0	0.92	1.1	1	1.03	1.05	1.05	13	13	13	17	17	17	0.938776	-0.0631789	1.14583	0.136132	1	0	1.0404	0.0396091	1.09375	0.0896122	1.02941	0.0289875
229650	27	39	1	1	0	1	20.7804	0	1	1	1	0	0	0	0	0	0	0	0	0	0	0.62	0.64	0.6	0.96	0.76	0.74	12	12	12	16	16	16	0.632653	-0.457833	0.666667	-0.405465	0.6	-0.510826	0.969697	-0.0307717	0.767677	-0.264387	0.732673	-0.311055
281871	20	38	0	1	0	0	24.093	0	0	0	1	0	0	0	0	0	0	0	0	0	0	0.6	1.83	0.7	0.89	1.8	0.76	13	13	13	17	17	17	0.612245	-0.490623	1.90625	0.645138	0.7	-0.356675	0.89899	-0.106483	1.875	0.628609	0.745098	-0.294239
285557	28	39	1	1	1	1	18.3655	0	0	0	0	0	0	0	0	0	0	0	0	0	0	1.37	0.95	1.1	0.64	0.71	0.78	12	12	12	16	16	16	1.39796	0.335013	0.989583	-0.0104713	1.1	0.0953102	0.646465	-0.436237	0.717172	-0.33244	0.772277	-0.258412
33452	36	38	0	1	0	1	22.68	1	1	1	1	0	0	0	0	0	0	1	0	0	0	0.64	1.11	0.8	1.72	0.92	0.84	14	14	14	17	17	17	0.609524	-0.495077	1.19355	0.176931	0.8	-0.223144	1.73737	0.552375	0.958333	-0.0425596	0.823529	-0.194156
285699	28	39	0	1	0	0	22.6003	0	1	1	1	0	0	0	0	0	0	1	0	0	0	1.93	1.6	1.1	1.8	1.21	1.32	13	13	13	16	16	16	1.96939	0.677723	1.66667	0.510826	1.1	0.0953102	1.81818	0.597837	1.22222	0.200671	1.30693	0.267681
239723	30	40	0	1	0	0	24.0346	0	1	0	0	0	0	0	0	0	0	0	0	0	0	0.63	0.92	0.9	0.88	1.09	0.98	13	13	13	16	16	16	0.642857	-0.441833	0.958333	-0.0425596	0.9	-0.105361	0.888889	-0.117783	1.10101	0.096228	0.970297	-0.030153
283498	31	40	1	1	0	1	23.7253	0	1	0	0	0	0	0	0	0	0	1	0	0	0	0.65	0.42	1.1	0.73	0.5	1	12	12	12	16	16	16	0.663265	-0.41058	0.4375	-0.826679	1.1	0.0953102	0.737374	-0.30466	0.505051	-0.683097	0.990099	-0.00995033
283557	28	38	1	1	0	0	18.5901	0	0	0	1	0	0	0	0	0	0	0	0	0	0	1.45	2.05	1.2	1.2	2.35	1.02	14	14	14	18	18	18	1.38095	0.322773	2.2043	0.79041	1.2	0.182322	1.21212	0.192372	2.5	0.916291	0.971429	-0.0289875
280493	23	38	1	1	1	1	19.7979	0	0	1	0	0	0	0	0	0	0	0	0	0	0	0.71	0.91	1.2	0.93	0.92	0.77	13	13	13	17	17	17	0.72449	-0.322288	0.947917	-0.0534887	1.2	0.182322	0.939394	-0.0625204	0.958333	-0.0425596	0.754902	-0.281167
241391	25	39	1	1	0	0	19.6986	0	1	0	1	0	0	0	0	0	0	0	0	0	0	0.85	0.66	1	0.84	0.59	1.12	12	12	12	18	18	18	0.867347	-0.142316	0.6875	-0.374693	1	0	0.848485	-0.164303	0.62766	-0.465757	1.06667	0.0645385
186110	31	38	1	1	0	0	23.7332	0	1	0	1	0	0	0	0	1	0	1	0	0	0	1.99	1.58	1.1	0.83	0.92	1.26	12	12	12	17	17	17	2.03061	0.708337	1.64583	0.498247	1.1	0.0953102	0.838384	-0.176279	0.958333	-0.0425596	1.23529	0.211309
282620	33	39	1	1	1	1	20.0773	0	1	0	1	0	0	0	0	0	0	0	0	0	0	0.55	0.89	1.1	0.84	1.12	1.08	12	12	12	16	16	16	0.561224	-0.577634	0.927083	-0.0757118	1.1	0.0953102	0.848485	-0.164303	1.13131	0.123379	1.06931	0.0670107
168516	27	39	0	1	1	1	16.2331	0	1	0	1	0	0	0	0	0	0	1	0	0	0	0.45	1.02	0.8	1.35	0.81	0.79	12	12	12	16	16	16	0.459184	-0.778305	1.0625	0.0606246	0.8	-0.223144	1.36364	0.310155	0.818182	-0.200671	0.782178	-0.245673
155318	36	38	0	1	1	1	22.0604	0	1	1	0	0	0	0	0	1	0	1	0	0	0	1.92	1.39	0.8	0.87	1.06	1.35	12	12	12	17	17	17	1.95918	0.672528	1.44792	0.370126	0.8	-0.223144	0.878788	-0.129212	1.10417	0.0990909	1.32353	0.280302
281384	26	39	0	1	0	1	20.6297	0	0	0	0	0	0	0	0	0	0	0	0	0	0	1.47	0.65	0.9	0.96	0.85	1.23	13	13	13	18	18	18	1.5	0.405465	0.677083	-0.389961	0.9	-0.105361	0.969697	-0.0307717	0.904255	-0.100644	1.17143	0.158224
282706	31	39	0	1	0	0	26.093	0	1	1	1	0	0	0	0	1	0	1	0	0	0	0.51	0.63	0.8	0.81	0.48	0.84	12	12	12	17	17	17	0.520408	-0.653142	0.65625	-0.421213	0.8	-0.223144	0.818182	-0.200671	0.5	-0.693147	0.823529	-0.194156
282746	28	39	0	1	1	1	26.1286	0	0	0	0	0	0	0	0	0	0	1	0	0	0	2.72	1.47	0.7	1.05	1.06	1.38	13	13	13	16	16	16	2.77551	1.02083	1.53125	0.426084	0.7	-0.356675	1.06061	0.0588405	1.07071	0.0683192	1.36634	0.312133
190473	22	39	0	1	0	1	19.4522	0	1	0	1	0	0	0	0	0	0	0	0	0	0	0.93	1.2	0.8	0.97	1.6	1.1	13	13	13	18	18	18	0.94898	-0.052368	1.25	0.223144	0.8	-0.223144	0.979798	-0.0204089	1.70213	0.531879	1.04762	0.04652
241862	35	38	1	1	1	1	20.4382	0	1	1	1	0	0	0	0	1	0	0	0	0	0	0.44	1.15	1.4	1.09	0.71	1.47	13	13	13	17	17	17	0.44898	-0.800778	1.19792	0.180584	1.4	0.336472	1.10101	0.096228	0.739583	-0.301668	1.44118	0.36546
284704	26	40	0	1	0	1	18.75	0	0	1	1	0	0	0	0	0	0	1	0	0	0	1.13	2	0.9	0.82	1.08	1.12	12	12	12	20	20	20	1.15306	0.14242	2.08333	0.733969	0.9	-0.105361	0.811881	-0.208401	1.17391	0.160343	1.04673	0.04567
284724	27	39	1	1	1	1	18.6709	0	1	0	0	0	0	0	0	0	0	0	0	0	0	1.04	1.5	1.1	1.13	1.74	1.12	12	12	12	16	16	16	1.06122	0.0594234	1.5625	0.446287	1.1	0.0953102	1.14141	0.132268	1.75758	0.563935	1.10891	0.103378
284750	35	40	0	1	1	1	17.7999	0	0	0	0	0	0	0	0	0	0	1	0	0	0	1.01	1.37	0.6	1.35	0.87	1.16	13	13	13	17	17	17	1.03061	0.030153	1.42708	0.355633	0.6	-0.510826	1.36364	0.310155	0.90625	-0.0984401	1.13725	0.128617
227435	28	39	1	1	0	0	19.7239	0	1	1	1	0	0	0	0	0	0	0	0	0	0	0.29	1.29	0.8	0.67	1.56	1.23	12	12	12	16	16	16	0.295918	-1.21767	1.34375	0.295464	0.8	-0.223144	0.676768	-0.390427	1.57576	0.454736	1.21782	0.197064
281943	26	40	0	1	0	0	18.5108	0	0	0	0	0	0	0	0	0	0	0	0	0	0	1.67	0.93	0.9	0.85	0.65	1.35	12	12	12	18	18	18	1.70408	0.533026	0.96875	-0.0317487	0.9	-0.105361	0.858586	-0.152469	0.691489	-0.368908	1.28571	0.251314
235604	28	37	0	1	0	1	19.7603	0	1	1	0	0	0	0	0	0	0	0	0	1	0	0.67	1.1	1.1	0.57	0.91	0.77	13	13	13	17	17	17	0.683673	-0.380275	1.14583	0.136132	1.1	0.0953102	0.575758	-0.552069	0.947917	-0.0534887	0.754902	-0.281167
165482	28	39	1	1	1	1	20.0796	0	1	0	0	0	0	0	0	0	0	0	0	0	0	0.29	0.76	0.9	1.05	0.42	0.91	12	12	12	16	16	16	0.295918	-1.21767	0.791667	-0.233615	0.9	-0.105361	1.06061	0.0588405	0.424242	-0.85745	0.90099	-0.104261
281476	30	39	0	1	1	1	18.6667	0	0	0	0	0	0	0	0	0	0	0	0	0	0	1.03	2.17	0.8	1.64	1.39	1.13	13	13	13	17	17	17	1.05102	0.0497615	2.26042	0.815549	0.8	-0.223144	1.65657	0.504747	1.44792	0.370126	1.10784	0.102415
283558	28	39	1	1	1	0	16.7697	0	0	1	1	0	0	0	0	0	0	0	0	0	0	0.83	1	0.8	1.58	1.04	1.38	14	14	14	17	17	17	0.790476	-0.23512	1.07527	0.0725707	0.8	-0.223144	1.59596	0.467475	1.08333	0.0800427	1.35294	0.302281
283938	32	40	1	1	1	0	22.3133	0	0	0	0	0	0	0	0	0	0	0	0	0	0	0.47	0.47	1.2	0.92	0.62	1.13	12	12	12	17	17	17	0.479592	-0.73482	0.489583	-0.714201	1.2	0.182322	0.929293	-0.0733313	0.645833	-0.437214	1.10784	0.102415
283949	30	34	1	1	1	0	25.8478	0	1	0	0	1	0	1	0	0	0	1	0	0	0	0.91	0.62	1.2	0.71	0.45	1.1	13	13	13	19	19	19	0.928571	-0.074108	0.645833	-0.437214	1.2	0.182322	0.717172	-0.33244	0.459184	-0.778305	1.05769	0.0560895
211021	30	39	0	1	0	1	24.6097	0	1	0	1	0	0	0	0	0	0	0	0	0	0	0.57	0.58	1.1	1.12	0.77	0.76	12	12	12	18	18	18	0.581633	-0.541916	0.604167	-0.503905	1.1	0.0953102	1.13131	0.123379	0.819149	-0.199489	0.72381	-0.323227
281390	26	39	0	1	1	1	15.1314	0	0	0	1	0	0	0	0	0	0	0	0	0	0	0.37	2	1	1.69	3.27	2.03	13	13	13	17	17	17	0.377551	-0.97405	2.08333	0.733969	1	0	1.70707	0.534779	3.40625	1.22561	1.9902	0.688233
281457	27	41	0	1	1	1	19.3835	0	0	0	0	0	0	0	0	0	0	0	0	0	0	2.73	1.34	1	0.77	1.28	1.45	13	13	13	17	17	17	2.78571	1.0245	1.39583	0.333492	1	0	0.777778	-0.251314	1.33333	0.287682	1.42157	0.351761
281459	33	39	0	1	1	1	22.5223	0	1	0	0	0	0	0	0	1	0	0	0	0	0	0.63	2.11	1.6	1.2	2.84	0.82	13	13	13	18	18	18	0.642857	-0.441833	2.19792	0.78751	1.6	0.470004	1.21212	0.192372	3.02128	1.10568	0.780952	-0.247241
75372	41	39	1	1	1	0	24.6548	0	1	0	0	0	0	0	0	0	0	1	0	0	0	0.92	1.98	1	1.06	2.64	1.25	12	12	12	17	17	17	0.938776	-0.0631789	2.0625	0.723919	1	0	1.07071	0.0683192	2.75	1.0116	1.22549	0.203341
282329	30	40	1	1	1	1	18.7305	0	0	1	0	0	0	0	0	0	0	0	0	0	0	3.3	1.75	1	1.32	2.51	1.06	13	13	13	18	18	18	3.36735	1.21413	1.82292	0.600438	1	0	1.33333	0.287682	2.67021	0.982158	1.00952	0.00947874
282379	27	38	1	1	1	0	22.7583	0	0	0	0	0	0	0	0	0	0	0	0	0	0	1.13	1.48	1.2	0.75	1.99	1.17	12	12	12	16	16	16	1.15306	0.14242	1.54167	0.432864	1.2	0.182322	0.757576	-0.277632	2.0101	0.698185	1.15842	0.147053
284760	27	40	1	1	1	1	19.5717	0	0	1	0	0	0	0	1	0	0	1	0	0	0	1.08	0.55	1.6	2.06	0.83	1.61	12	12	12	17	17	17	1.10204	0.0971637	0.572917	-0.557015	1.6	0.470004	2.08081	0.732756	0.864583	-0.145508	1.57843	0.456432
284763	25	39	0	1	0	1	20	0	0	0	0	0	0	0	0	0	0	2	0	0	0	2.57	0.37	0.7	1.38	0.3	1.4	12	12	12	16	16	16	2.62245	0.964109	0.385417	-0.95343	0.7	-0.356675	1.39394	0.332134	0.30303	-1.19392	1.38614	0.326522
223236	28	40	0	1	1	1	21.3382	0	1	0	1	0	0	0	0	0	0	0	0	0	0	1.49	1.39	1	0.68	1.22	0.88	12	12	12	18	18	18	1.52041	0.418979	1.44792	0.370126	1	0	0.686869	-0.375612	1.29787	0.260726	0.838095	-0.176624
282085	29	40	0	1	1	1	19.1406	0	0	0	0	0	0	0	0	0	0	0	0	0	0	0.75	3.57	1	0.65	5.58	1.5	13	13	13	16	16	16	0.765306	-0.267479	3.71875	1.31339	1	0	0.656566	-0.420733	5.63636	1.72924	1.48515	0.395515
281498	32	39	0	1	1	1	17.3604	0	1	0	0	0	0	0	0	0	0	0	0	0	0	1.15	2.51	1	0.6	2.02	0.91	13	13	13	16	16	16	1.17347	0.159965	2.61458	0.961105	1	0	0.606061	-0.500775	2.0404	0.713148	0.90099	-0.104261
281511	27	40	1	1	1	1	17.5444	0	0	0	0	0	0	0	0	0	0	0	0	0	0	0.94	0.5	0.9	0.92	1.16	1.19	13	13	13	17	17	17	0.959184	-0.0416727	0.520833	-0.652325	0.9	-0.105361	0.929293	-0.0733313	1.20833	0.189242	1.16667	0.154151
281771	32	40	0	1	1	1	21.9296	0	0	0	0	0	0	0	0	0	0	0	0	0	0	0.77	2.33	1.2	1.17	3.2	0.79	12	12	12	16	16	16	0.785714	-0.241162	2.42708	0.88669	1.2	0.182322	1.18182	0.167054	3.23232	1.1732	0.782178	-0.245673
281846	30	39	0	1	1	1	21.9056	0	0	1	0	0	0	0	0	0	0	0	0	0	0	1.34	1.2	0.8	0.79	0.98	1.1	13	13	13	17	17	17	1.36735	0.312872	1.25	0.223144	0.8	-0.223144	0.79798	-0.225672	1.02083	0.0206193	1.07843	0.0755076
281855	36	39	0	1	1	0	22.4766	0	1	1	1	0	0	0	0	0	0	0	0	0	0	1.76	1.63	1.1	1.06	1.21	1.5	12	12	12	16	16	16	1.79592	0.585517	1.69792	0.529402	1.1	0.0953102	1.07071	0.0683192	1.22222	0.200671	1.48515	0.395515
281925	30	38	0	1	1	0	21.6311	0	1	0	0	0	0	0	0	0	0	0	0	0	0	1.54	2.1	1	0.62	1.33	1.09	12	12	12	16	16	16	1.57143	0.451985	2.1875	0.782759	1	0	0.626263	-0.467985	1.34343	0.295229	1.07921	0.0762274
187897	27	40	0	1	1	1	17.8896	0	1	1	0	0	0	0	0	0	0	0	0	0	0	1.09	1.14	1.1	0.9	0.76	0.94	11	11	11	16	16	16	1.14737	0.137471	1.16327	0.151231	1.1	0.0953102	0.909091	-0.0953102	0.767677	-0.264387	0.930693	-0.0718257
281965	29	39	1	1	1	1	25.7778	0	0	0	1	0	0	0	0	0	0	1	0	0	0	1	1.02	0.9	1.24	1.69	0.99	12	12	12	16	16	16	1.02041	0.0202027	1.0625	0.0606246	0.9	-0.105361	1.25253	0.225162	1.70707	0.534779	0.980198	-0.0200007
283478	26	40	0	1	0	1	24.2188	0	0	0	0	0	0	0	0	0	0	0	0	0	0	1.09	0.75	1	0.96	0.69	1.19	13	13	13	17	17	17	1.11224	0.10638	0.78125	-0.24686	1	0	0.969697	-0.0307717	0.71875	-0.330242	1.16667	0.154151
284065	30	41	1	1	1	0	18.369	0	0	1	1	0	0	0	0	0	0	0	0	1	0	1.27	0.5	1.6	1.34	0.44	2.23	12	12	12	16	16	16	1.29592	0.25922	0.520833	-0.652325	1.6	0.470004	1.35354	0.30272	0.444444	-0.81093	2.20792	0.792051
186689	27	40	1	1	1	0	16.0641	0	1	1	0	0	0	0	0	0	0	0	0	0	0	1.68	1.05	0.8	0.56	0.51	0.85	12	12	12	19	19	19	1.71429	0.538997	1.09375	0.0896122	0.8	-0.223144	0.565657	-0.569768	0.520408	-0.653142	0.817308	-0.20174
284077	30	38	0	1	0	1	20.8209	0	1	0	1	0	0	0	0	0	0	0	0	0	0	0.97	3.67	1.1	1.34	2.72	1	13	13	13	18	18	18	0.989796	-0.0102565	3.82292	1.34101	1.1	0.0953102	1.35354	0.30272	2.89362	1.06251	0.952381	-0.0487902
282385	26	39	0	1	1	1	17.0993	0	0	1	0	0	0	0	0	0	0	0	0	0	0	0.45	0.61	1.2	0.59	1.02	1.15	12	12	12	17	17	17	0.459184	-0.778305	0.635417	-0.453474	1.2	0.182322	0.59596	-0.517582	1.0625	0.0606246	1.12745	0.119959
236275	28	39	0	1	1	1	23.03	0	1	0	0	0	0	0	0	0	0	0	0	0	0	0.26	1.4	0.8	0.72	1.28	0.77	12	12	12	17	17	17	0.265306	-1.32687	1.45833	0.377294	0.8	-0.223144	0.727273	-0.318454	1.33333	0.287682	0.754902	-0.281167
284520	30	38	0	1	1	1	20.1172	0	1	1	0	0	0	0	0	1	0	0	0	0	0	0.52	0.57	1.2	1.23	0.61	1.42	13	13	13	17	17	17	0.530612	-0.633724	0.59375	-0.521297	1.2	0.182322	1.24242	0.217065	0.635417	-0.453474	1.39216	0.330854
284531	22	39	1	1	1	0	18.5224	0	0	1	0	0	0	0	0	0	0	0	0	0	0	1.3	0.72	1.1	0.75	0.48	1.54	12	12	12	16	16	16	1.32653	0.282567	0.75	-0.287682	1.1	0.0953102	0.757576	-0.277632	0.484848	-0.723919	1.52475	0.421832
284542	33	38	1	1	1	0	21.5052	0	0	1	0	0	0	0	0	0	0	1	0	0	0	0.56	0.5	0.9	1.03	0.59	1.29	12	12	12	16	16	16	0.571429	-0.559616	0.520833	-0.652325	0.9	-0.105361	1.0404	0.0396091	0.59596	-0.517582	1.27723	0.244692
284581	32	40	1	1	1	1	22.9421	0	1	1	0	0	0	0	1	0	0	1	0	0	0	0.71	0.36	1.2	2.26	0.22	1.21	13	13	13	17	17	17	0.72449	-0.322288	0.375	-0.980829	1.2	0.182322	2.28283	0.825415	0.229167	-1.47331	1.18627	0.170818
283104	31	39	1	1	1	0	18.3732	0	1	1	0	0	0	0	0	1	0	0	0	0	0	0.69	1.1	1.3	0.84	1.08	1.08	12	12	12	17	17	17	0.704082	-0.350861	1.14583	0.136132	1.3	0.262364	0.848485	-0.164303	1.125	0.117783	1.05882	0.0571584
282553	26	39	1	1	1	1	19.1953	0	0	1	1	0	0	0	0	0	0	0	0	0	0	2.03	0.55	1	0.96	0.75	0.97	13	13	13	17	17	17	2.07143	0.728239	0.572917	-0.557015	1	0	0.969697	-0.0307717	0.78125	-0.24686	0.95098	-0.0502618
283154	35	41	1	1	1	0	18.369	1	1	1	1	0	0	0	0	0	0	0	0	1	0	0.98	0.16	1	1.26	0.25	1.04	13	13	13	16	16	16	1	0	0.166667	-1.79176	1	0	1.27273	0.241162	0.252525	-1.37624	1.0297	0.0292704
283167	27	39	0	1	1	1	19.8141	0	0	0	0	0	0	0	0	0	0	0	0	0	0	1.04	0.96	0.6	0.86	0.91	1.08	12	12	12	16	16	16	1.06122	0.0594234	1	0	0.6	-0.510826	0.868687	-0.140773	0.919192	-0.0842603	1.06931	0.0670107
248359	31	38	1	1	0	0	25.9869	0	1	1	1	0	0	0	0	1	0	1	0	0	0	0.54	0.69	1.2	1.52	0.94	1.55	13	13	13	17	17	17	0.55102	-0.595983	0.71875	-0.330242	1.2	0.182322	1.53535	0.428761	0.979167	-0.0210534	1.51961	0.418452
282771	24	40	0	1	1	0	17.2248	0	0	0	1	0	0	0	0	0	0	1	0	0	0	1.89	0.68	0.9	1.24	0.57	0.89	14	14	14	17	17	17	1.8	0.587787	0.731183	-0.313092	0.9	-0.105361	1.25253	0.225162	0.59375	-0.521297	0.872549	-0.136336
283124	28	39	1	1	1	1	24.1672	0	1	0	0	0	0	0	0	0	0	0	0	0	0	0.79	1.04	1.4	1.24	0.46	1.3	13	13	13	17	17	17	0.806122	-0.21552	1.08333	0.0800427	1.4	0.336472	1.25253	0.225162	0.479167	-0.735707	1.27451	0.242562
283186	22	40	1	1	1	1	16.8475	0	0	0	0	0	0	0	0	0	0	0	0	0	0	0.65	2.14	0.7	0.67	1.34	1.23	12	12	12	17	17	17	0.663265	-0.41058	2.22917	0.801628	0.7	-0.356675	0.676768	-0.390427	1.39583	0.333492	1.20588	0.187212
283543	33	40	1	1	0	0	21.2306	0	1	0	0	0	0	0	0	1	0	0	0	0	0	1.19	0.35	1	0.92	0.22	1.15	12	12	12	17	17	17	1.21429	0.194156	0.364583	-1.009	1	0	0.929293	-0.0733313	0.229167	-1.47331	1.12745	0.119959
48933	37	40	0	1	1	1	19.5799	0	1	1	0	0	0	0	0	1	0	0	0	0	0	1.62	0.93	1.5	0.71	1.02	0.96	12	12	12	16	16	16	1.65306	0.502629	0.96875	-0.0317487	1.5	0.405465	0.717172	-0.33244	1.0303	0.029853	0.950495	-0.0507723
283563	29	40	0	1	1	1	22.0317	0	0	1	0	0	0	0	0	0	0	0	0	0	0	1.2	0.75	1.1	0.92	0.74	1.44	13	13	13	17	17	17	1.22449	0.202524	0.78125	-0.24686	1.1	0.0953102	0.929293	-0.0733313	0.770833	-0.260283	1.41176	0.34484
282318	33	39	1	1	1	0	25.3444	0	0	0	0	0	0	0	1	0	0	0	0	0	0	0.66	0.63	1	1.05	0.78	1.02	12	12	12	17	17	17	0.673469	-0.395313	0.65625	-0.421213	1	0	1.06061	0.0588405	0.8125	-0.207639	1	0
282768	25	38	1	1	0	1	20.8048	0	1	0	0	0	0	0	0	1	0	0	0	0	0	1.63	1.02	1.2	0.88	1.01	1.27	12	12	12	17	17	17	1.66327	0.508783	1.0625	0.0606246	1.2	0.182322	0.888889	-0.117783	1.05208	0.0507723	1.2451	0.219214
34799	34	39	1	1	0	0	22.0386	0	1	1	1	0	0	0	0	0	0	1	0	0	0	0.57	1.23	0.9	1.36	0.63	1.66	12	12	12	16	16	16	0.581633	-0.541916	1.28125	0.247836	0.9	-0.105361	1.37374	0.317535	0.636364	-0.451985	1.64356	0.496867
281854	27	40	0	1	1	1	16.937	0	0	0	0	0	0	0	0	0	0	0	0	0	0	1.72	1.7	1.2	0.71	1.13	1.18	13	13	13	19	19	19	1.7551	0.562527	1.77083	0.57145	1.2	0.182322	0.717172	-0.33244	1.15306	0.14242	1.13462	0.126294
274889	26	39	0	1	1	1	18.9036	0	0	1	0	0	0	0	0	0	0	0	0	0	0	1.65	1.64	0.8	0.64	1.9	1.07	12	12	12	17	17	17	1.68367	0.520978	1.70833	0.535518	0.8	-0.223144	0.646465	-0.436237	1.97917	0.682676	1.04902	0.047856
219552	29	39	0	1	1	1	19.313	0	1	0	0	0	0	0	0	0	0	0	0	0	0	1.66	0.95	0.7	1.3	1.36	1.61	13	13	13	17	17	17	1.69388	0.52702	0.989583	-0.0104713	0.7	-0.356675	1.31313	0.272415	1.41667	0.348307	1.57843	0.456432
282588	27	39	1	1	0	1	21.0962	0	0	0	0	0	0	0	0	0	0	0	0	0	0	0.99	0.91	0.7	0.72	0.74	0.98	13	13	13	17	17	17	1.0102	0.0101524	0.947917	-0.0534887	0.7	-0.356675	0.727273	-0.318454	0.770833	-0.260283	0.960784	-0.0400053
282819	29	41	1	1	1	1	20.4491	0	0	0	0	0	0	0	0	0	0	0	0	0	0	0.52	2.44	1.2	0.94	3.81	1.01	13	13	13	16	16	16	0.530612	-0.633724	2.54167	0.93282	1.2	0.182322	0.949495	-0.0518251	3.84848	1.34768	1	0
282825	25	39	0	1	0	0	20.4491	0	1	0	1	0	0	0	0	1	0	0	0	0	0	0.18	1.04	0.8	0.56	1.67	0.98	12	12	12	16	16	16	0.183673	-1.6946	1.08333	0.0800427	0.8	-0.223144	0.565657	-0.569768	1.68687	0.522874	0.970297	-0.030153
223139	22	40	0	1	1	1	18.3249	0	1	0	0	0	0	0	0	0	0	0	0	0	0	0.59	1.2	0.8	1.08	0.77	1.02	12	12	12	17	17	17	0.602041	-0.50743	1.25	0.223144	0.8	-0.223144	1.09091	0.0870114	0.802083	-0.220543	1	0
281489	31	41	0	1	1	0	21.2084	0	0	0	0	0	0	0	0	0	0	0	0	0	0	1.26	1.47	0.9	0.65	1.37	0.96	13	13	13	16	16	16	1.28571	0.251314	1.53125	0.426084	0.9	-0.105361	0.656566	-0.420733	1.38384	0.324861	0.950495	-0.0507723
285195	28	38	1	1	0	0	18.424	0	0	0	0	0	0	0	0	0	0	0	0	0	0	0.63	1.05	0.7	1.23	1.36	1.03	13	13	13	17	17	17	0.642857	-0.441833	1.09375	0.0896122	0.7	-0.356675	1.24242	0.217065	1.41667	0.348307	1.0098	0.00975617
285311	30	39	0	1	0	0	18.955	0	0	0	1	0	0	0	0	0	0	1	0	0	0	0.96	2.48	0.9	1.22	1.18	1.28	12	12	12	17	17	17	0.979592	-0.0206193	2.58333	0.949081	0.9	-0.105361	1.23232	0.208901	1.22917	0.206336	1.2549	0.227057
285320	39	38	1	1	1	1	25.8297	0	1	1	0	0	0	0	0	0	0	0	0	0	0	0.18	0.58	0.8	0.91	0.8	0.96	12	12	12	17	17	17	0.183673	-1.6946	0.604167	-0.503905	0.8	-0.223144	0.919192	-0.0842603	0.833333	-0.182322	0.941176	-0.0606246
133058	35	39	0	1	1	1	25.3333	0	1	0	0	0	0	0	0	0	0	1	0	0	0	0.55	0.82	0.6	0.95	0.7	1.38	13	13	13	17	17	17	0.561224	-0.577634	0.854167	-0.157629	0.6	-0.510826	0.959596	-0.041243	0.729167	-0.315853	1.35294	0.302281
143256	30	40	1	1	0	0	27.0051	0	1	1	0	0	0	0	0	0	0	0	0	0	0	0.82	1.35	1.3	0.96	1.71	0.75	13	13	13	17	17	17	0.836735	-0.178248	1.40625	0.340927	1.3	0.262364	0.969697	-0.0307717	1.78125	0.577315	0.735294	-0.307485
283622	26	38	0	1	0	1	21.2183	0	0	0	0	0	0	0	0	0	0	1	0	0	0	0.59	1.03	0.9	1.04	1.43	1.2	13	13	13	16	16	16	0.602041	-0.50743	1.07292	0.0703808	0.9	-0.105361	1.05051	0.049271	1.44444	0.367725	1.18812	0.172371
282787	25	39	0	1	0	0	25.9088	0	0	0	1	0	0	0	0	0	0	0	0	0	0	1.71	1.04	1.2	0.87	0.98	1.13	12	12	12	16	16	16	1.7449	0.556696	1.08333	0.0800427	1.2	0.182322	0.878788	-0.129212	0.989899	-0.0101524	1.11881	0.112267
282853	29	41	0	1	1	1	22.3945	0	0	0	0	0	0	0	0	0	0	0	0	0	0	1.48	3.2	0.9	0.76	3.09	1.19	12	12	12	16	16	16	1.5102	0.412245	3.33333	1.20397	0.9	-0.105361	0.767677	-0.264387	3.12121	1.13822	1.17822	0.164003
281826	27	39	1	1	0	0	23.4852	0	1	1	0	0	0	0	0	1	0	0	0	0	0	0.66	0.78	1.7	1.25	0.61	0.98	14	14	14	17	17	17	0.628571	-0.464306	0.83871	-0.175891	1.7	0.530628	1.26263	0.233194	0.635417	-0.453474	0.960784	-0.0400053
233838	29	39	1	1	0	0	19.8351	0	1	1	0	0	0	0	0	0	0	0	0	0	0	1.3	0.69	1.3	0.9	0.82	1.2	12	12	12	17	17	17	1.32653	0.282567	0.71875	-0.330242	1.3	0.262364	0.909091	-0.0953102	0.854167	-0.157629	1.17647	0.162519
282612	30	40	0	1	1	1	25.0781	0	1	0	0	0	0	0	0	1	0	0	0	0	0	0.59	0.81	0.9	1.09	1.04	1.3	13	13	13	17	17	17	0.602041	-0.50743	0.84375	-0.169899	0.9	-0.105361	1.10101	0.096228	1.08333	0.0800427	1.27451	0.242562
282646	34	40	0	1	0	0	19.6283	0	1	1	1	0	0	0	0	0	0	0	0	0	0	2.36	2.58	1	1.25	2.4	1.25	12	12	12	16	16	16	2.40816	0.878864	2.6875	0.988611	1	0	1.26263	0.233194	2.42424	0.885519	1.23762	0.213193
281030	34	39	1	1	1	0	23.4952	0	1	0	0	0	0	0	0	1	0	0	0	0	0	1.56	0.55	1	0.92	0.5	1.35	12	12	12	16	16	16	1.59184	0.464889	0.572917	-0.557015	1	0	0.929293	-0.0733313	0.505051	-0.683097	1.33663	0.290154
278614	26	40	0	1	0	0	34.049	0	1	0	0	0	0	0	0	0	0	0	0	0	0	0.46	1.53	0.9	0.69	1.55	0.66	12	12	12	18	18	18	0.469388	-0.756326	1.59375	0.46609	0.9	-0.105361	0.69697	-0.361013	1.64894	0.50013	0.628571	-0.464306
281053	24	39	0	1	0	1	16.4062	0	1	1	1	0	0	0	0	0	0	0	0	0	0	1.14	1.27	1	1.37	1.1	0.86	12	12	12	16	16	16	1.16327	0.151231	1.32292	0.279839	1	0	1.38384	0.324861	1.11111	0.105361	0.851485	-0.160773
281054	27	36	1	1	0	0	18.3951	0	0	0	0	1	0	1	0	0	0	0	0	1	0	1.25	0.97	1.4	0.86	1.04	0.84	12	12	12	17	17	17	1.27551	0.243346	1.01042	0.0103628	1.4	0.336472	0.868687	-0.140773	1.08333	0.0800427	0.823529	-0.194156
281074	34	40	1	1	1	0	20.3125	0	0	0	0	0	0	0	0	0	0	0	0	0	0	1.59	2.34	1	0.58	2.01	1.03	13	13	13	17	17	17	1.62245	0.483937	2.4375	0.890973	1	0	0.585859	-0.534677	2.09375	0.738957	1.0098	0.00975617
281085	36	41	0	1	1	1	21.5668	0	1	1	0	0	0	0	0	0	0	0	0	0	0	1.23	1.37	0.8	0.54	1.45	1.33	12	12	12	17	17	17	1.2551	0.227217	1.42708	0.355633	0.8	-0.223144	0.545455	-0.606136	1.51042	0.412386	1.30392	0.265376
269248	23	41	0	1	1	1	17.9089	0	0	0	0	0	0	0	0	0	0	0	0	0	0	1.16	0.8	0.9	0.59	0.81	1.01	12	12	12	17	17	17	1.18367	0.168623	0.833333	-0.182322	0.9	-0.105361	0.59596	-0.517582	0.84375	-0.169899	0.990196	-0.0098523
282191	27	39	0	1	1	1	19.1406	0	0	0	0	0	0	0	0	0	0	0	0	0	0	1.82	0.72	1.1	0.98	0.87	0.95	14	14	14	18	18	18	1.73333	0.550046	0.774194	-0.255933	1.1	0.0953102	0.989899	-0.0101524	0.925532	-0.0773867	0.904762	-0.100083
282201	39	40	0	0	1	1	19.6235	0	1	1	0	0	0	0	0	0	0	0	0	0	0	0.73	1.6	1.3	0.93	1.49	1.25	13	13	13	17	17	17	0.744898	-0.294508	1.66667	0.510826	1.3	0.262364	0.939394	-0.0625204	1.55208	0.439598	1.22549	0.203341
282203	26	39	1	1	1	1	17.5781	0	0	0	0	0	0	0	0	0	0	0	0	0	0	0.95	1.48	0.7	1.02	1.99	1.14	12	12	12	17	17	17	0.969388	-0.0310906	1.54167	0.432864	0.7	-0.356675	1.0303	0.029853	2.07292	0.728957	1.11765	0.111226
281042	31	41	0	1	1	0	21.8314	0	1	1	0	0	0	0	0	0	0	0	0	0	0	1	2.14	0.8	0.87	2.09	0.88	13	13	13	17	17	17	1.02041	0.0202027	2.22917	0.801628	0.8	-0.223144	0.878788	-0.129212	2.17708	0.777986	0.862745	-0.147636
281078	35	40	1	1	0	1	28.5156	0	1	0	0	0	0	0	0	0	0	0	0	0	0	1.35	0.85	1.2	1.21	0.86	1.15	12	12	12	16	16	16	1.37755	0.320307	0.885417	-0.121697	1.2	0.182322	1.22222	0.200671	0.868687	-0.140773	1.13861	0.129812
232001	32	38	0	1	1	1	20	0	1	1	0	0	0	0	0	0	0	0	0	0	0	1.22	1.51	1	0.68	1.29	0.95	12	12	12	18	18	18	1.2449	0.219054	1.57292	0.452932	1	0	0.686869	-0.375612	1.37234	0.316518	0.904762	-0.100083
201468	22	40	1	1	0	0	21.2585	0	1	1	1	0	0	0	0	0	0	0	0	0	0	0.86	0.25	0.7	0.87	0.19	0.95	12	12	12	17	17	17	0.877551	-0.13062	0.260417	-1.34547	0.7	-0.356675	0.878788	-0.129212	0.197917	-1.61991	0.931373	-0.0710959
283185	26	37	1	1	0	0	20.4152	0	0	1	1	0	0	0	0	0	0	1	0	0	0	1.47	0.61	0.7	0.52	0.35	0.91	13	13	13	18	18	18	1.5	0.405465	0.635417	-0.453474	0.7	-0.356675	0.525253	-0.643876	0.37234	-0.987947	0.866667	-0.143101
283211	31	40	0	1	1	1	21.4569	0	0	1	1	0	0	0	0	0	0	1	0	0	0	2.73	0.67	1.1	0.86	1.24	1.41	12	12	12	17	17	17	2.78571	1.0245	0.697917	-0.359656	1.1	0.0953102	0.868687	-0.140773	1.29167	0.255933	1.38235	0.323787
283218	31	39	0	1	1	0	24.1609	0	0	1	0	0	0	0	0	0	0	0	0	0	0	1.36	0.77	0.8	0.88	0.46	0.98	12	12	12	16	16	16	1.38776	0.327687	0.802083	-0.220543	0.8	-0.223144	0.888889	-0.117783	0.464646	-0.766478	0.970297	-0.030153
283237	33	40	0	1	1	1	19.7239	0	1	1	1	0	0	0	0	0	0	0	0	0	0	1.03	0.81	1.2	0.69	0.7	0.91	12	12	12	16	16	16	1.05102	0.0497615	0.84375	-0.169899	1.2	0.182322	0.69697	-0.361013	0.707071	-0.346625	0.90099	-0.104261
279521	29	38	1	1	1	1	16.8663	0	0	0	0	0	0	0	0	0	0	0	0	0	0	1.66	1.07	0.6	1.02	0.87	1.42	13	13	13	16	16	16	1.69388	0.52702	1.11458	0.108481	0.6	-0.510826	1.0303	0.029853	0.878788	-0.129212	1.40594	0.340707
273487	26	37	1	1	0	1	16.4062	0	0	0	0	0	0	0	0	0	0	0	0	0	0	0.88	0.44	0.6	1.52	0.34	0.71	12	12	12	16	16	16	0.897959	-0.107631	0.458333	-0.780159	0.6	-0.510826	1.53535	0.428761	0.343434	-1.06876	0.70297	-0.352441
271269	23	39	1	1	1	1	28.3039	0	0	0	0	0	0	0	0	0	0	0	0	0	0	0.89	0.62	1.5	1.23	0.55	1.23	11	11	11	15	15	15	0.936842	-0.0652405	0.632653	-0.457833	1.5	0.405465	1.23	0.207014	0.528846	-0.637058	1.2551	0.227217
283914	29	39	1	1	1	0	21.2306	0	0	1	1	0	0	0	0	0	0	1	0	0	0	1.14	2.73	0.9	1.34	1.9	1.21	12	12	12	16	16	16	1.16327	0.151231	2.84375	1.04512	0.9	-0.105361	1.35354	0.30272	1.91919	0.651904	1.19802	0.18067
283386	33	41	1	1	1	1	21.6193	0	0	0	0	0	0	0	1	0	0	0	0	0	0	4.52	1.16	1.2	1.4	0.81	1.38	12	12	12	17	17	17	4.61224	1.52871	1.20833	0.189242	1.2	0.182322	1.41414	0.346523	0.84375	-0.169899	1.35294	0.302281
217720	30	38	1	1	1	1	22.5466	0	1	1	1	0	0	0	0	0	0	1	0	0	0	0.57	0.75	1	0.56	0.49	1.19	12	12	12	17	17	17	0.581633	-0.541916	0.78125	-0.24686	1	0	0.565657	-0.569768	0.510417	-0.672528	1.16667	0.154151
283421	23	39	0	1	0	0	21.4844	0	0	1	0	0	0	0	0	0	0	0	0	0	0	1.19	1.37	1.4	0.8	1.48	1.09	12	12	12	17	17	17	1.21429	0.194156	1.42708	0.355633	1.4	0.336472	0.808081	-0.213093	1.54167	0.432864	1.06863	0.0663751
283441	38	36	1	1	1	0	22.0604	0	1	0	0	1	0	1	0	1	0	0	0	0	0	1.75	0.83	1.1	1.29	0.62	0.92	13	13	13	17	17	17	1.78571	0.579818	0.864583	-0.145508	1.1	0.0953102	1.30303	0.264693	0.645833	-0.437214	0.901961	-0.103184
283466	30	40	0	1	1	1	20.7031	0	1	0	1	0	0	0	0	0	0	0	0	0	0	1.43	2.81	1	1.3	2.13	1.07	12	12	12	16	16	16	1.45918	0.377877	2.92708	1.07401	1	0	1.31313	0.272415	2.15152	0.766172	1.05941	0.0577083
280034	34	39	1	1	1	1	22.5627	0	0	0	0	0	0	0	0	0	0	0	0	0	0	0.61	0.82	0.8	1.01	1.04	1.37	12	12	12	16	16	16	0.622449	-0.474094	0.854167	-0.157629	0.8	-0.223144	1.0202	0.0200007	1.05051	0.049271	1.35644	0.30486
101183	35	40	1	1	1	1	24.0882	0	1	0	0	0	0	0	0	0	0	0	0	0	0	0.69	2.19	0.6	0.8	1.67	0.93	12	12	12	16	16	16	0.704082	-0.350861	2.28125	0.824724	0.6	-0.510826	0.808081	-0.213093	1.68687	0.522874	0.920792	-0.082521
278459	29	39	1	1	1	1	24.6482	0	0	0	0	0	0	0	0	0	0	1	0	0	0	0.84	1.07	1.1	1.18	0.62	0.93	12	12	12	16	16	16	0.857143	-0.154151	1.11458	0.108481	1.1	0.0953102	1.19192	0.175565	0.626263	-0.467985	0.920792	-0.082521
281149	33	38	1	1	1	1	18.2857	0	0	0	0	0	0	0	1	0	0	0	0	0	0	1.93	5.73	1.4	1.71	7.16	1.38	12	12	12	16	16	16	1.96939	0.677723	5.96875	1.78654	1.4	0.336472	1.72727	0.546544	7.23232	1.97856	1.36634	0.312133
281186	26	40	1	1	1	1	24.8889	0	0	0	1	0	0	0	0	0	0	0	0	0	0	0.85	1.18	0.7	1.19	1.41	0.98	13	13	13	17	17	17	0.867347	-0.142316	1.22917	0.206336	0.7	-0.356675	1.20202	0.184004	1.46875	0.384412	0.960784	-0.0400053
281610	30	38	0	1	1	0	19.6752	0	1	0	0	0	0	0	0	0	0	0	0	0	0	1.35	0.74	0.8	0.52	0.47	1.16	13	13	13	18	18	18	1.37755	0.320307	0.770833	-0.260283	0.8	-0.223144	0.525253	-0.643876	0.5	-0.693147	1.10476	0.0996298
281620	26	40	1	1	1	1	22.8516	0	0	0	0	0	0	0	0	0	0	0	0	0	0	1.46	1.48	1.3	0.59	1.52	1.49	12	12	12	16	16	16	1.4898	0.398639	1.54167	0.432864	1.3	0.262364	0.59596	-0.517582	1.53535	0.428761	1.47525	0.388826
248837	31	40	1	1	0	1	21.4309	0	1	0	0	0	0	0	0	0	0	0	0	0	0	0.47	0.59	0.9	1.02	0.47	1.07	13	13	13	17	17	17	0.479592	-0.73482	0.614583	-0.486811	0.9	-0.105361	1.0303	0.029853	0.489583	-0.714201	1.04902	0.047856
282473	28	41	1	1	1	1	19.5312	0	0	1	0	0	0	0	0	0	0	0	0	0	0	1.3	0.51	1	0.83	0.43	1.04	13	13	13	17	17	17	1.32653	0.282567	0.53125	-0.632523	1	0	0.838384	-0.176279	0.447917	-0.803148	1.01961	0.0194181
281945	34	38	0	1	0	0	19.1001	0	1	0	0	0	0	0	0	1	0	0	0	0	0	1.33	2.26	0.8	0.68	1.49	1.18	12	12	12	16	16	16	1.35714	0.305382	2.35417	0.856187	0.8	-0.223144	0.686869	-0.375612	1.50505	0.408826	1.16832	0.155564
281963	29	39	1	1	1	1	21.6418	0	0	1	1	0	0	0	0	0	0	1	0	0	0	0.92	0.53	1.1	0.96	0.56	0.81	12	12	12	16	16	16	0.938776	-0.0631789	0.552083	-0.594056	1.1	0.0953102	0.969697	-0.0307717	0.565657	-0.569768	0.80198	-0.220671
281982	25	39	1	1	1	0	16.9563	0	0	1	1	0	0	0	0	0	0	1	0	0	0	0.56	0.4	1.1	0.86	0.39	1.62	12	12	12	17	17	17	0.571429	-0.559616	0.416667	-0.875469	1.1	0.0953102	0.868687	-0.140773	0.40625	-0.900787	1.58824	0.462624
282037	28	40	1	1	1	0	17.4818	0	1	0	1	0	0	0	0	0	0	0	0	0	0	0.96	1.94	0.6	1.17	2.28	0.96	12	12	12	17	17	17	0.979592	-0.0206193	2.02083	0.70351	0.6	-0.510826	1.18182	0.167054	2.375	0.864997	0.941176	-0.0606246
282674	32	39	1	1	1	0	17.1488	0	0	0	0	0	0	0	0	0	0	0	0	0	0	1.33	1.01	1	1.1	1.14	1.54	13	13	13	18	18	18	1.35714	0.305382	1.05208	0.0507723	1	0	1.11111	0.105361	1.21277	0.192904	1.46667	0.382992
282716	30	40	1	1	1	0	25.8761	0	1	1	1	0	0	0	0	0	0	1	0	0	0	1.18	0.35	0.8	0.83	0.15	1.26	12	12	12	18	18	18	1.20408	0.185717	0.364583	-1.009	0.8	-0.223144	0.838384	-0.176279	0.159574	-1.83524	1.2	0.182322
282392	23	40	0	1	1	1	20.9868	0	0	1	1	0	0	0	0	0	0	0	0	0	0	0.87	1.29	0.9	1.08	1.12	1.3	12	12	12	16	16	16	0.887755	-0.119059	1.34375	0.295464	0.9	-0.105361	1.09091	0.0870114	1.13131	0.123379	1.28713	0.252414
281740	21	39	1	1	1	1	28.441	0	0	0	0	0	0	0	0	0	0	0	0	0	0	0.74	0.65	0.7	1.3	0.42	1.26	12	12	12	16	16	16	0.755102	-0.280902	0.677083	-0.389961	0.7	-0.356675	1.31313	0.272415	0.424242	-0.85745	1.24752	0.221161
281781	37	35	0	1	0	1	23.573	0	1	1	1	1	0	1	0	1	0	0	0	0	0	0.93	0.75	1	1.11	1.21	0.75	12	12	12	17	17	17	0.94898	-0.052368	0.78125	-0.24686	1	0	1.12121	0.11441	1.26042	0.231442	0.735294	-0.307485
233887	26	38	1	1	1	0	21.83	0	0	0	0	0	0	0	0	0	0	0	0	0	0	0.72	0.83	0.8	0.7	0.46	1.13	13	13	13	17	17	17	0.734694	-0.308301	0.864583	-0.145508	0.8	-0.223144	0.707071	-0.346625	0.479167	-0.735707	1.10784	0.102415
166130	27	38	1	1	1	0	32.3685	0	1	0	0	0	0	0	0	1	0	1	1	0	0	1.29	1.96	1	0.9	1.29	1.12	12	12	12	18	18	18	1.31633	0.274845	2.04167	0.713766	1	0	0.909091	-0.0953102	1.37234	0.316518	1.06667	0.0645385
108250	29	39	1	1	1	1	21.6311	0	1	1	1	0	0	0	0	0	0	0	0	0	0	0.92	0.82	0.9	0.75	0.65	1.24	12	12	12	17	17	17	0.938776	-0.0631789	0.854167	-0.157629	0.9	-0.105361	0.757576	-0.277632	0.677083	-0.389961	1.21569	0.195309
281506	28	37	1	1	1	0	20.3125	0	0	0	0	0	0	0	0	0	0	1	0	0	0	0.85	2.13	1.1	1.13	0.95	1.18	13	13	13	17	17	17	0.867347	-0.142316	2.21875	0.796944	1.1	0.0953102	1.14141	0.132268	0.989583	-0.0104713	1.15686	0.145712
203430	30	40	0	1	1	1	22.1003	0	1	0	0	0	0	0	0	0	0	0	0	0	0	0.65	0.69	0.9	0.8	0.96	1.1	11	11	11	15	15	15	0.684211	-0.37949	0.704082	-0.350861	0.9	-0.105361	0.8	-0.223144	0.923077	-0.0800427	1.12245	0.115513
282904	28	38	0	1	0	0	35.4367	0	0	0	0	0	0	0	0	0	0	0	0	0	0	2.33	0.46	0.9	1.35	0.76	1.23	12	12	12	16	16	16	2.37755	0.866071	0.479167	-0.735707	0.9	-0.105361	1.36364	0.310155	0.767677	-0.264387	1.21782	0.197064
282910	34	38	1	1	1	1	23.7332	0	1	0	0	0	0	0	0	1	0	1	0	1	0	0.68	0.94	0.8	1.06	1.06	1.05	12	12	12	18	18	18	0.693878	-0.36546	0.979167	-0.0210534	0.8	-0.223144	1.07071	0.0683192	1.12766	0.120144	1	0
282949	26	40	0	1	1	0	24.3418	0	0	0	0	0	0	0	0	0	0	1	0	0	0	0.94	0.69	0.9	0.83	0.85	1.1	14	14	14	18	18	18	0.895238	-0.110666	0.741935	-0.298493	0.9	-0.105361	0.838384	-0.176279	0.904255	-0.100644	1.04762	0.04652
284786	28	40	0	1	1	1	18.5901	0	0	1	0	0	0	0	0	0	0	0	0	0	0	1.31	0.61	1.4	1	0.49	1.03	13	13	13	17	17	17	1.33673	0.29023	0.635417	-0.453474	1.4	0.336472	1.0101	0.0100503	0.510417	-0.672528	1.0098	0.00975617
282045	26	38	0	1	1	1	19.5312	0	0	0	0	0	0	0	0	0	0	0	0	0	0	2.22	2.13	1	0.76	2.35	1.08	13	13	13	17	17	17	2.26531	0.81771	2.21875	0.796944	1	0	0.767677	-0.264387	2.44792	0.895237	1.05882	0.0571584
282063	27	39	1	1	1	1	16.2031	0	0	1	0	0	0	0	0	0	0	0	0	0	0	0.43	1.05	1	1.24	1.27	1.04	12	12	12	16	16	16	0.438776	-0.823767	1.09375	0.0896122	1	0	1.25253	0.225162	1.28283	0.249067	1.0297	0.0292704
232148	30	41	0	1	1	1	21.0105	0	1	1	1	0	0	0	0	0	0	1	0	0	0	0.85	1.72	0.7	1.05	1.15	0.84	12	12	12	16	16	16	0.867347	-0.142316	1.79167	0.583146	0.7	-0.356675	1.06061	0.0588405	1.16162	0.149812	0.831683	-0.184304
281533	30	39	1	1	1	0	18.3655	0	1	0	0	0	0	0	0	1	0	0	0	0	0	1.29	1.54	0.8	1.29	1.16	1.43	13	13	13	17	17	17	1.31633	0.274845	1.60417	0.472604	0.8	-0.223144	1.30303	0.264693	1.20833	0.189242	1.40196	0.337872
279220	37	39	1	1	0	1	23.3377	0	1	1	1	0	0	0	1	1	0	0	0	0	0	0.8	0.75	1.1	0.69	0.74	1.23	12	12	12	17	17	17	0.816327	-0.202941	0.78125	-0.24686	1.1	0.0953102	0.69697	-0.361013	0.770833	-0.260283	1.20588	0.187212
281583	33	39	1	1	0	1	32.4662	0	1	0	0	0	0	0	0	1	0	1	0	0	0	1.06	0.57	1.1	1.35	0.53	1.44	12	12	12	17	17	17	1.08163	0.0784716	0.59375	-0.521297	1.1	0.0953102	1.36364	0.310155	0.552083	-0.594056	1.41176	0.34484
134267	31	39	0	1	1	1	20.4382	0	1	0	1	0	0	0	0	1	0	0	0	0	0	1.21	0.98	0.8	0.78	1.09	0.8	13	13	13	18	18	18	1.23469	0.210823	1.02083	0.0206193	0.8	-0.223144	0.787879	-0.238411	1.15957	0.148053	0.761905	-0.271934
265691	30	38	1	1	1	0	28.4799	0	1	1	1	0	0	0	0	1	0	0	0	0	0	0.51	0.62	0.9	0.76	0.89	0.95	12	12	12	16	16	16	0.520408	-0.653142	0.645833	-0.437214	0.9	-0.105361	0.767677	-0.264387	0.89899	-0.106483	0.940594	-0.0612436
246540	28	40	0	1	0	1	19.1953	0	1	1	0	0	0	0	0	0	0	0	0	0	0	1.16	0.55	0.9	1.97	0.83	1.18	12	12	12	17	17	17	1.18367	0.168623	0.572917	-0.557015	0.9	-0.105361	1.9899	0.688084	0.864583	-0.145508	1.15686	0.145712
281784	28	38	0	1	1	1	23.0332	0	0	0	0	0	0	0	0	0	0	1	0	0	0	0.68	0.19	0.9	1.13	0.16	0.9	12	12	12	17	17	17	0.693878	-0.36546	0.197917	-1.61991	0.9	-0.105361	1.14141	0.132268	0.166667	-1.79176	0.882353	-0.125163
281785	34	37	1	1	1	1	25.3444	0	1	0	0	0	0	0	0	0	0	0	0	0	0	0.48	0.76	1	1.03	0.93	0.92	12	12	12	16	16	16	0.489796	-0.713766	0.791667	-0.233615	1	0	1.0404	0.0396091	0.939394	-0.0625204	0.910891	-0.0933319
280301	35	37	1	1	1	0	21.7784	0	1	0	0	0	0	0	0	1	0	0	0	0	0	0.74	0.46	1.1	0.69	0.48	0.94	13	13	13	17	17	17	0.755102	-0.280902	0.479167	-0.735707	1.1	0.0953102	0.69697	-0.361013	0.5	-0.693147	0.921569	-0.081678
281821	40	38	1	0	1	1	22.1893	0	1	0	0	0	0	0	0	0	0	1	0	0	0	0.93	1.67	1	1.19	1.35	1.43	12	12	12	16	16	16	0.94898	-0.052368	1.73958	0.553646	1	0	1.20202	0.184004	1.36364	0.310155	1.41584	0.347724
282235	33	39	1	1	1	1	20.7756	0	0	0	0	0	0	0	0	0	0	0	0	0	0	1.19	1.4	1.2	0.48	1.95	1.02	13	13	13	17	17	17	1.21429	0.194156	1.45833	0.377294	1.2	0.182322	0.484848	-0.723919	2.03125	0.708651	1	0
255550	24	37	0	1	0	1	33.2265	0	0	1	1	0	0	0	0	0	0	1	0	1	0	0.82	2.65	1.4	0.5	1.23	0.96	12	12	12	17	17	17	0.836735	-0.178248	2.76042	1.01538	1.4	0.336472	0.505051	-0.683097	1.28125	0.247836	0.941176	-0.0606246
211466	30	38	0	1	1	1	27.2392	0	1	0	0	0	0	0	0	0	0	1	0	0	0	0.75	0.37	0.7	0.92	0.36	1.09	13	13	13	17	17	17	0.765306	-0.267479	0.385417	-0.95343	0.7	-0.356675	0.929293	-0.0733313	0.375	-0.980829	1.06863	0.0663751
282291	33	39	0	1	0	1	18.9181	0	1	0	1	0	0	0	0	1	0	0	0	0	0	1.76	2.23	0.8	1.21	2.24	0.95	12	12	12	16	16	16	1.79592	0.585517	2.32292	0.842824	0.8	-0.223144	1.22222	0.200671	2.26263	0.816526	0.940594	-0.0612436
281515	26	41	0	1	1	0	22.8329	0	0	1	1	0	0	0	0	0	0	0	0	0	0	0.46	1.41	1	1.07	1.24	0.86	13	13	13	17	17	17	0.469388	-0.756326	1.46875	0.384412	1	0	1.08081	0.077709	1.29167	0.255933	0.843137	-0.170626
282622	27	39	1	1	1	1	18.2711	0	0	0	0	0	0	0	0	0	0	0	0	0	0	1.6	0.59	1.4	0.74	0.52	1.77	12	12	12	17	17	17	1.63265	0.490206	0.614583	-0.486811	1.4	0.336472	0.747475	-0.291055	0.541667	-0.613104	1.73529	0.551177
282914	29	41	1	1	0	0	26.0974	0	1	0	0	0	0	0	0	1	0	0	0	0	0	0.78	0.57	0.7	1.04	0.8	0.92	12	12	12	16	16	16	0.795918	-0.228259	0.59375	-0.521297	0.7	-0.356675	1.05051	0.049271	0.808081	-0.213093	0.910891	-0.0933319
282455	33	38	0	1	0	1	25.3333	0	1	1	0	0	0	0	0	1	0	0	0	0	0	1.09	0.56	0.9	1.55	0.65	1.01	12	12	12	17	17	17	1.11224	0.10638	0.583333	-0.538997	0.9	-0.105361	1.56566	0.448305	0.677083	-0.389961	0.990196	-0.0098523
284832	20	41	0	1	0	0	18.9866	0	0	0	1	0	0	0	0	0	0	0	0	0	0	0.82	2.1	0.9	1.02	1.92	1.05	12	12	12	16	16	16	0.836735	-0.178248	2.1875	0.782759	0.9	-0.105361	1.0303	0.029853	1.93939	0.662376	1.0396	0.0388398
284906	29	39	0	1	0	0	20.8763	0	1	1	1	0	0	0	0	0	0	1	0	0	0	0.56	1.59	1.2	1.03	2.1	1.49	12	12	12	17	17	17	0.571429	-0.559616	1.65625	0.504556	1.2	0.182322	1.0404	0.0396091	2.1875	0.782759	1.46078	0.378973
284971	22	41	1	1	1	0	22.4813	0	0	0	0	0	0	0	0	0	0	0	0	0	0	1.09	0.57	0.9	1.15	0.66	1.17	12	12	12	16	16	16	1.11224	0.10638	0.59375	-0.521297	0.9	-0.105361	1.16162	0.149812	0.666667	-0.405465	1.15842	0.147053
247027	26	40	1	1	1	1	19.9573	0	1	0	0	0	0	0	0	0	0	0	0	0	0	1.48	1.81	1.2	1.08	0.58	0.86	12	12	12	16	16	16	1.5102	0.412245	1.88542	0.634149	1.2	0.182322	1.09091	0.0870114	0.585859	-0.534677	0.851485	-0.160773
272525	29	40	0	1	1	1	18.5891	0	0	0	0	0	0	0	0	0	0	1	0	0	0	0.93	0.5	0.9	0.96	0.35	1.19	13	13	13	16	16	16	0.94898	-0.052368	0.520833	-0.652325	0.9	-0.105361	0.969697	-0.0307717	0.353535	-1.03977	1.17822	0.164003
281257	26	40	0	1	1	0	19.7055	0	0	0	1	0	0	0	0	0	0	0	0	0	0	1.05	0.64	0.8	1.27	0.88	1.21	12	12	12	17	17	17	1.07143	0.0689929	0.666667	-0.405465	0.8	-0.223144	1.28283	0.249067	0.916667	-0.0870114	1.18627	0.170818
282026	32	39	1	1	1	1	21.3593	0	1	0	0	0	0	0	0	0	0	0	0	0	0	0.29	1.12	1	0.72	0.86	1.1	12	12	12	16	16	16	0.295918	-1.21767	1.16667	0.154151	1	0	0.727273	-0.318454	0.868687	-0.140773	1.08911	0.0853598
177591	23	38	0	1	0	1	19.4771	0	1	0	0	0	0	0	0	0	0	0	0	0	0	0.78	1.32	1.1	1	0.88	1.58	12	12	12	16	16	16	0.795918	-0.228259	1.375	0.318454	1.1	0.0953102	1.0101	0.0100503	0.888889	-0.117783	1.56436	0.447475
283281	27	36	0	1	1	1	23.3887	0	0	0	0	1	0	1	0	0	0	0	0	0	0	1.61	1.51	0.8	0.48	1.29	0.81	12	12	12	16	16	16	1.64286	0.496437	1.57292	0.452932	0.8	-0.223144	0.484848	-0.723919	1.30303	0.264693	0.80198	-0.220671
282352	26	39	1	1	1	0	22.0386	0	0	0	0	0	0	0	0	0	0	0	0	0	0	0.55	0.75	1.1	0.86	0.7	1.07	14	14	14	18	18	18	0.52381	-0.646627	0.806452	-0.215111	1.1	0.0953102	0.868687	-0.140773	0.744681	-0.2948	1.01905	0.0188685
282157	29	39	1	1	1	1	19.0677	0	1	0	0	0	0	0	0	0	0	0	0	0	0	1.63	0.82	1.1	1.01	1.15	0.97	12	12	12	16	16	16	1.66327	0.508783	0.854167	-0.157629	1.1	0.0953102	1.0202	0.0200007	1.16162	0.149812	0.960396	-0.0404095
282206	29	39	0	1	0	1	19.9219	0	0	0	1	0	0	0	0	0	0	1	0	0	0	0.88	0.7	0.8	0.93	0.51	1.57	12	12	12	16	16	16	0.897959	-0.107631	0.729167	-0.315853	0.8	-0.223144	0.939394	-0.0625204	0.515152	-0.663294	1.55446	0.441125
247521	41	36	1	1	0	0	21.6413	0	1	1	0	1	0	1	0	0	0	0	0	0	0	0.98	0.97	0.8	1.1	0.99	1.03	13	13	13	18	18	18	1	0	1.01042	0.0103628	0.8	-0.223144	1.11111	0.105361	1.05319	0.0518251	0.980952	-0.0192314
282224	23	40	1	1	1	1	17.4472	0	0	1	1	0	0	0	0	0	0	0	0	0	0	1.41	0.77	0.7	1.01	0.86	1.35	12	12	12	16	16	16	1.43878	0.363792	0.802083	-0.220543	0.7	-0.356675	1.0202	0.0200007	0.868687	-0.140773	1.33663	0.290154
282259	28	40	0	1	1	0	20.3074	0	0	1	1	0	0	0	0	0	0	0	0	0	0	1.97	0.54	0.8	0.8	0.47	1.28	11	11	11	16	16	16	2.07368	0.729327	0.55102	-0.595983	0.8	-0.223144	0.808081	-0.213093	0.474747	-0.744972	1.26733	0.23691
285207	25	38	0	1	1	0	18.7575	0	0	0	1	0	0	0	0	0	0	0	0	0	0	1.09	1.17	0.9	0.95	1.72	1.19	13	13	13	19	19	19	1.11224	0.10638	1.21875	0.197826	0.9	-0.105361	0.959596	-0.041243	1.7551	0.562527	1.14423	0.134733
282510	30	39	0	1	1	1	20.678	0	1	1	1	0	0	0	0	0	0	0	0	0	0	1.26	0.41	0.8	1.02	0.47	1.1	12	12	12	17	17	17	1.28571	0.251314	0.427083	-0.850776	0.8	-0.223144	1.0303	0.029853	0.489583	-0.714201	1.07843	0.0755076
185436	32	39	0	1	0	1	19.1001	0	1	1	1	0	0	0	0	0	0	0	0	0	0	0.76	2.13	1	1.73	3.31	1.84	12	12	12	17	17	17	0.77551	-0.254234	2.21875	0.796944	1	0	1.74747	0.558172	3.44792	1.23777	1.80392	0.589963
272049	28	40	1	1	1	1	21.6311	0	0	0	0	0	0	0	0	0	0	0	0	0	0	1.8	1.21	1.3	0.85	1.01	1.25	13	13	13	17	17	17	1.83673	0.607989	1.26042	0.231442	1.3	0.262364	0.858586	-0.152469	1.05208	0.0507723	1.22549	0.203341
281847	31	40	1	1	1	0	22.5466	0	1	0	0	0	0	0	0	0	0	0	0	0	0	0.86	1.9	1	0.82	1.64	1.58	12	12	12	18	18	18	0.877551	-0.13062	1.97917	0.682676	1	0	0.828283	-0.188401	1.74468	0.556572	1.50476	0.408635
284624	27	39	0	1	0	1	17.3333	0	0	1	1	0	0	0	0	0	0	0	0	0	0	0.71	0.74	0.8	0.49	0.35	1.56	11	11	11	16	16	16	0.747368	-0.291197	0.755102	-0.280902	0.8	-0.223144	0.494949	-0.7033	0.353535	-1.03977	1.54455	0.434735
257776	28	40	0	1	0	1	23.4415	0	0	0	1	0	0	0	0	0	0	1	0	0	0	1.16	1.32	1.4	1.09	1.35	1.02	13	13	13	17	17	17	1.18367	0.168623	1.375	0.318454	1.4	0.336472	1.10101	0.096228	1.40625	0.340927	1	0
166426	25	37	1	1	0	0	20.8325	0	1	0	0	0	0	0	0	0	0	0	0	0	0	0.9	0.73	1.1	1.02	0.67	1.41	13	13	13	16	16	16	0.918367	-0.0851578	0.760417	-0.273889	1.1	0.0953102	1.0303	0.029853	0.676768	-0.390427	1.39604	0.333639
284682	27	40	1	1	0	0	21.3507	0	0	0	1	0	0	0	0	0	0	0	0	0	0	1.18	1.3	1.3	1.13	1.37	1.28	13	13	13	18	18	18	1.20408	0.185717	1.35417	0.303186	1.3	0.262364	1.14141	0.132268	1.45745	0.376686	1.21905	0.19807
110543	33	39	1	1	1	1	21.4844	0	1	1	1	0	0	0	0	0	0	0	0	0	0	0.61	0.76	0.8	1.17	0.55	1.88	12	12	12	16	16	16	0.622449	-0.474094	0.791667	-0.233615	0.8	-0.223144	1.18182	0.167054	0.555556	-0.587787	1.86139	0.621321
283174	31	39	1	1	1	1	18.75	0	0	0	0	0	0	0	0	0	0	0	0	0	0	1.87	1.05	1.3	2.21	0.77	1.31	13	13	13	18	18	18	1.90816	0.646141	1.09375	0.0896122	1.3	0.262364	2.23232	0.803043	0.819149	-0.199489	1.24762	0.221237
283232	28	39	0	1	0	1	20.7031	0	0	0	1	0	0	0	1	0	0	0	0	0	0	0.98	0.35	0.8	0.88	0.45	1.77	12	12	12	16	16	16	1	0	0.364583	-1.009	0.8	-0.223144	0.888889	-0.117783	0.454545	-0.788457	1.75248	0.561029
282559	31	39	0	1	1	1	21.9726	0	1	0	0	0	0	0	0	0	0	0	0	0	0	1.18	0.48	1.1	1.01	0.58	0.59	13	13	13	17	17	17	1.20408	0.185717	0.5	-0.693147	1.1	0.0953102	1.0202	0.0200007	0.604167	-0.503905	0.578431	-0.547435
243122	25	39	0	1	0	0	17.7096	0	1	1	1	0	0	0	0	0	0	1	0	0	0	0.99	2.88	0.8	1.22	3.3	1.09	13	13	13	17	17	17	1.0102	0.0101524	3	1.09861	0.8	-0.223144	1.23232	0.208901	3.4375	1.23474	1.06863	0.0663751
285346	33	39	1	1	0	0	21.9916	0	1	0	0	0	0	0	0	0	0	1	0	0	0	0.69	1.18	1.1	1.25	1.7	1.62	12	12	12	16	16	16	0.704082	-0.350861	1.22917	0.206336	1.1	0.0953102	1.26263	0.233194	1.71717	0.540679	1.60396	0.472476
43275	37	37	1	1	1	1	23.5304	1	1	0	0	0	0	0	0	1	0	1	0	0	0	1.1	1.06	1.2	1.4	0.98	1.11	12	12	12	16	16	16	1.12245	0.115513	1.10417	0.0990909	1.2	0.182322	1.41414	0.346523	0.989899	-0.0101524	1.09901	0.0944097
280399	28	40	1	1	1	1	18.5922	0	0	0	1	0	0	0	0	0	0	0	0	0	0	0.64	1.83	1.2	0.64	0.89	1.45	12	12	12	16	16	16	0.653061	-0.426084	1.90625	0.645138	1.2	0.182322	0.646465	-0.436237	0.89899	-0.106483	1.43564	0.361613
60605	34	39	0	1	1	1	19.6506	0	1	0	0	0	0	0	0	1	0	0	0	0	0	1.61	0.98	0.9	0.92	1.09	1.31	11	11	11	15	15	15	1.69474	0.527527	1	0	0.9	-0.105361	0.92	-0.0833816	1.04808	0.046957	1.33673	0.29023
280411	32	40	0	1	0	0	23.2669	0	1	0	1	0	0	0	0	0	0	0	0	0	0	1.27	2.4	0.7	1.25	1.31	1.05	12	12	12	17	17	17	1.29592	0.25922	2.5	0.916291	0.7	-0.356675	1.26263	0.233194	1.36458	0.310849	1.02941	0.0289875
214282	23	39	0	1	1	1	17.9688	0	0	0	0	0	0	0	0	0	0	0	0	0	0	0.64	0.5	1.1	1	0.44	0.77	12	12	12	16	16	16	0.653061	-0.426084	0.520833	-0.652325	1.1	0.0953102	1.0101	0.0100503	0.444444	-0.81093	0.762376	-0.271315
188022	30	39	0	1	1	1	18.6667	0	1	0	0	0	0	0	0	0	0	0	0	0	0	1.83	1.54	1.5	1.48	1.95	0.95	13	13	13	17	17	17	1.86735	0.624519	1.60417	0.472604	1.5	0.405465	1.49495	0.402092	2.03125	0.708651	0.931373	-0.0710959
284684	27	40	1	1	1	1	17.5278	0	0	0	0	0	0	0	0	0	0	0	0	0	0	0.84	1.3	1	1.02	1.02	1.16	12	12	12	15	15	15	0.857143	-0.154151	1.35417	0.303186	1	0	1.02	0.0198026	0.980769	-0.0194181	1.18367	0.168623
145249	27	39	0	1	1	1	19.5184	0	1	1	1	0	0	0	0	0	0	2	0	0	0	1.11	0.62	1.1	0.77	0.65	1.31	13	13	13	18	18	18	1.13265	0.124563	0.645833	-0.437214	1.1	0.0953102	0.777778	-0.251314	0.691489	-0.368908	1.24762	0.221237
281984	28	39	1	1	1	1	17.7688	0	0	0	0	0	0	0	0	0	0	0	0	0	0	1.37	0.91	0.8	1.31	1.04	0.9	12	12	12	17	17	17	1.39796	0.335013	0.947917	-0.0534887	0.8	-0.223144	1.32323	0.280077	1.08333	0.0800427	0.882353	-0.125163
281990	27	41	1	1	1	1	17.6693	0	0	0	0	0	0	0	1	0	0	0	0	0	0	1.21	0.81	1.3	1.86	0.8	0.94	14	14	14	17	17	17	1.15238	0.14183	0.870968	-0.13815	1.3	0.262364	1.87879	0.630627	0.833333	-0.182322	0.921569	-0.081678
282920	26	39	0	1	1	1	20.6905	0	0	0	0	0	0	0	0	0	0	0	0	0	0	0.89	0.95	0.7	0.96	0.7	1.17	13	13	13	17	17	17	0.908163	-0.0963311	0.989583	-0.0104713	0.7	-0.356675	0.969697	-0.0307717	0.729167	-0.315853	1.14706	0.137201
282921	32	39	0	1	1	1	26.8386	1	1	1	1	0	0	0	0	0	0	0	0	0	0	0.85	1.38	1.1	1.47	1.23	1.27	13	13	13	17	17	17	0.867347	-0.142316	1.4375	0.362905	1.1	0.0953102	1.48485	0.395313	1.28125	0.247836	1.2451	0.219214
282963	27	39	1	1	1	1	17.1875	0	0	0	0	0	0	0	0	0	0	1	0	0	0	1.21	1.19	1	0.91	1.18	1.68	13	13	13	17	17	17	1.23469	0.210823	1.23958	0.214775	1	0	0.919192	-0.0842603	1.22917	0.206336	1.64706	0.498991
282220	27	39	0	1	1	1	22.2222	0	0	0	0	0	0	0	0	0	0	0	0	0	0	0.28	0.37	0.8	0.76	0.31	1.16	12	12	12	17	17	17	0.285714	-1.25276	0.385417	-0.95343	0.8	-0.223144	0.767677	-0.264387	0.322917	-1.13036	1.13725	0.128617
282250	35	39	0	0	1	0	24.1415	0	1	1	1	0	0	0	0	1	0	0	0	0	0	0.55	0.78	0.9	0.99	0.65	1.4	12	12	12	16	16	16	0.561224	-0.577634	0.8125	-0.207639	0.9	-0.105361	1	0	0.656566	-0.420733	1.38614	0.326522
283628	38	38	1	1	1	0	22.6667	0	1	0	0	0	0	0	0	1	0	0	0	0	0	0.87	0.7	1.1	1.07	0.56	1.42	13	13	13	17	17	17	0.887755	-0.119059	0.729167	-0.315853	1.1	0.0953102	1.08081	0.077709	0.583333	-0.538997	1.39216	0.330854
196652	25	40	0	1	1	1	20.4491	0	1	1	1	0	0	0	0	0	0	0	0	0	0	2.16	0.89	1	0.99	1	1.17	12	12	12	16	16	16	2.20408	0.790311	0.927083	-0.0757118	1	0	1	0	1.0101	0.0100503	1.15842	0.147053
169620	35	39	1	1	1	1	19.8642	0	1	0	0	0	0	0	0	1	0	0	0	0	0	1.44	0.96	1.3	1.16	0.8	1.55	13	13	13	17	17	17	1.46939	0.384846	1	0	1.3	0.262364	1.17172	0.15847	0.833333	-0.182322	1.51961	0.418452
283652	28	39	0	1	0	0	20.0773	0	1	0	1	0	0	0	0	0	0	0	0	0	0	0.37	1.28	0.9	1.17	1.38	1.91	12	12	12	16	16	16	0.377551	-0.97405	1.33333	0.287682	0.9	-0.105361	1.18182	0.167054	1.39394	0.332134	1.89109	0.637153
283661	29	40	0	1	1	0	21.0938	0	0	0	0	0	0	0	0	0	0	0	0	0	0	1.24	1.43	0.7	0.61	1.3	1.1	13	13	13	16	16	16	1.26531	0.235314	1.48958	0.398496	0.7	-0.356675	0.616162	-0.484246	1.31313	0.272415	1.08911	0.0853598
283686	33	39	0	1	1	1	17.5781	0	1	1	0	0	0	0	0	0	0	1	0	0	0	2.31	0.71	1	0.64	0.56	0.95	13	13	13	16	16	16	2.35714	0.85745	0.739583	-0.301668	1	0	0.646465	-0.436237	0.565657	-0.569768	0.940594	-0.0612436
283251	35	39	1	1	1	1	22.0317	0	1	1	1	0	0	0	0	1	0	0	0	0	0	0.92	0.39	1.6	0.81	0.43	1.04	13	13	13	18	18	18	0.938776	-0.0631789	0.40625	-0.900787	1.6	0.470004	0.818182	-0.200671	0.457447	-0.782095	0.990476	-0.00956945
281275	25	38	0	1	1	1	19.9792	0	0	1	0	0	0	0	0	0	0	0	0	0	0	0.74	1.25	0.4	0.71	0.67	1	12	12	12	18	18	18	0.755102	-0.280902	1.30208	0.263966	0.4	-0.916291	0.717172	-0.33244	0.712766	-0.338602	0.952381	-0.0487902
281310	34	39	1	1	0	0	17.6899	0	1	0	0	0	0	0	0	0	0	0	0	0	0	0.86	0.67	0.7	0.87	0.64	0.97	12	12	12	16	16	16	0.877551	-0.13062	0.697917	-0.359656	0.7	-0.356675	0.878788	-0.129212	0.646465	-0.436237	0.960396	-0.0404095
166558	35	35	1	1	1	1	24.5761	0	0	0	0	1	0	1	0	0	0	0	0	0	0	2.48	2.08	1	1.09	2.31	1.07	12	12	12	16	16	16	2.53061	0.928461	2.16667	0.77319	1	0	1.10101	0.096228	2.33333	0.847298	1.05941	0.0577083
282962	35	39	0	1	1	1	21.4844	0	1	0	0	0	0	0	0	0	0	0	0	0	0	0.41	1.14	0.6	0.7	0.94	1.65	13	13	13	17	17	17	0.418367	-0.871395	1.1875	0.17185	0.6	-0.510826	0.707071	-0.346625	0.979167	-0.0210534	1.61765	0.480973
243654	27	40	1	1	1	1	20.83	0	1	0	0	0	0	0	0	0	0	0	0	0	0	1.12	0.42	1.3	0.87	0.71	1.2	14	14	14	17	17	17	1.06667	0.0645385	0.451613	-0.79493	1.3	0.262364	0.878788	-0.129212	0.739583	-0.301668	1.17647	0.162519
282985	27	39	0	1	0	1	22.6207	0	1	0	0	0	0	0	0	1	0	0	0	0	0	0.45	1.97	0.8	0.9	1.35	0.7	12	12	12	16	16	16	0.459184	-0.778305	2.05208	0.718856	0.8	-0.223144	0.909091	-0.0953102	1.36364	0.310155	0.693069	-0.366625
283056	30	39	0	1	1	1	17.9089	0	1	0	0	0	0	0	0	0	0	0	0	0	0	0.49	0.93	1.2	1.38	1.07	1.04	12	12	12	17	17	17	0.5	-0.693147	0.96875	-0.0317487	1.2	0.182322	1.39394	0.332134	1.11458	0.108481	1.01961	0.0194181
139801	30	39	0	1	1	1	22.806	0	1	0	0	0	0	0	0	0	0	0	0	0	0	1.13	0.76	1	1.02	0.67	0.95	12	12	12	16	16	16	1.15306	0.14242	0.791667	-0.233615	1	0	1.0303	0.029853	0.676768	-0.390427	0.940594	-0.0612436
282682	26	39	0	1	1	0	17.5278	0	0	0	0	0	0	0	0	0	0	0	0	0	0	0.79	0.51	1.3	1.18	0.38	1.3	12	12	12	16	16	16	0.806122	-0.21552	0.53125	-0.632523	1.3	0.262364	1.19192	0.175565	0.383838	-0.957534	1.28713	0.252414
281191	30	39	0	1	0	1	20.1733	0	1	0	0	0	0	0	0	1	0	0	0	0	0	0.33	0.88	0.9	0.84	0.85	0.89	12	12	12	16	16	16	0.336735	-1.08846	0.916667	-0.0870114	0.9	-0.105361	0.848485	-0.164303	0.858586	-0.152469	0.881188	-0.126484
235659	21	40	1	1	0	1	22.3133	0	0	0	0	0	0	0	1	0	0	0	0	0	0	0.92	1.71	0.9	1.53	0.71	1.23	12	12	12	16	16	16	0.938776	-0.0631789	1.78125	0.577315	0.9	-0.105361	1.54545	0.435318	0.717172	-0.33244	1.21782	0.197064
281279	32	34	0	1	1	1	21.9056	0	1	1	0	1	0	1	0	0	0	1	0	0	0	1.14	2.03	1.3	0.89	2.35	1.1	12	12	12	16	16	16	1.16327	0.151231	2.11458	0.748858	1.3	0.262364	0.89899	-0.106483	2.37374	0.864466	1.08911	0.0853598
281306	28	40	0	1	1	0	21.9363	0	0	1	1	0	0	0	0	0	0	0	0	0	0	1.79	0.59	1	0.99	0.69	1.36	13	13	13	17	17	17	1.82653	0.602418	0.614583	-0.486811	1	0	1	0	0.71875	-0.330242	1.33333	0.287682
283341	27	39	1	1	1	1	17.1875	0	0	0	0	0	0	0	0	0	0	0	0	0	0	1.03	0.95	0.8	0.87	0.83	1.05	12	12	12	17	17	17	1.05102	0.0497615	0.989583	-0.0104713	0.8	-0.223144	0.878788	-0.129212	0.864583	-0.145508	1.02941	0.0289875
282585	32	39	0	1	1	1	23.5883	0	0	0	0	0	0	0	0	0	0	1	0	0	0	0.46	0.43	1	1.02	0.99	1.25	13	13	13	17	17	17	0.469388	-0.756326	0.447917	-0.803148	1	0	1.0303	0.029853	1.03125	0.0307717	1.22549	0.203341
277780	35	39	1	1	1	1	20.1951	0	1	0	0	0	0	0	0	0	0	1	0	0	0	1.25	1.3	1.4	0.78	1.38	1.06	13	13	13	17	17	17	1.27551	0.243346	1.35417	0.303186	1.4	0.336472	0.787879	-0.238411	1.4375	0.362905	1.03922	0.0384663
282624	26	40	0	1	1	0	22.6562	0	0	0	0	0	0	0	0	0	0	1	0	0	0	1.27	1.33	0.7	0.72	0.9	1.21	13	13	13	16	16	16	1.29592	0.25922	1.38542	0.326001	0.7	-0.356675	0.727273	-0.318454	0.909091	-0.0953102	1.19802	0.18067
261732	36	40	1	1	1	1	19.313	0	1	1	0	0	0	0	0	0	0	0	0	0	0	0.62	3.85	0.8	2.04	5.5	1.21	13	13	13	17	17	17	0.632653	-0.457833	4.01042	1.3889	0.8	-0.223144	2.06061	0.723	5.72917	1.74557	1.18627	0.170818
284306	33	38	1	1	1	1	20.3857	0	0	0	0	0	0	0	0	1	0	0	0	0	0	0.39	1.02	1	1.26	1.65	1.17	12	12	12	17	17	17	0.397959	-0.921406	1.0625	0.0606246	1	0	1.27273	0.241162	1.71875	0.541597	1.14706	0.137201
284311	22	40	0	1	1	0	18.5078	0	0	0	1	0	0	0	0	0	0	0	0	0	0	1.55	0.61	1.1	1.52	1.32	1.52	12	12	12	18	18	18	1.58163	0.458458	0.635417	-0.453474	1.1	0.0953102	1.53535	0.428761	1.40426	0.339507	1.44762	0.36992
153969	30	40	1	1	1	0	19.8413	1	1	0	0	0	0	0	0	0	0	0	0	0	0	2.57	1.15	0.7	0.92	1.04	0.78	12	12	12	17	17	17	2.62245	0.964109	1.19792	0.180584	0.7	-0.356675	0.929293	-0.0733313	1.08333	0.0800427	0.764706	-0.268264
284388	30	40	1	1	1	0	20.0046	0	1	1	0	0	0	0	0	1	0	0	0	0	0	0.81	0.98	1.1	0.84	1	0.86	13	13	13	17	17	17	0.826531	-0.190518	1.02083	0.0206193	1.1	0.0953102	0.848485	-0.164303	1.04167	0.040822	0.843137	-0.170626
284420	25	40	1	1	1	0	20.4382	0	0	0	1	0	0	0	0	0	0	0	0	0	0	1.1	1.35	1.1	1.14	1.23	1.07	12	12	12	18	18	18	1.12245	0.115513	1.40625	0.340927	1.1	0.0953102	1.15152	0.141079	1.30851	0.26889	1.01905	0.0188685
282118	26	37	1	1	0	0	16.7058	0	0	1	1	0	0	0	0	0	0	0	0	0	0	1.26	2.5	1.2	1.08	3.89	0.76	11	11	11	17	17	17	1.32632	0.282405	2.55102	0.936493	1.2	0.182322	1.09091	0.0870114	4.05208	1.39923	0.745098	-0.294239
112047	33	39	1	1	1	1	28.0957	0	1	0	0	0	0	0	0	1	0	0	0	0	0	0.77	0.66	1.5	0.81	0.55	1.14	13	13	13	17	17	17	0.785714	-0.241162	0.6875	-0.374693	1.5	0.405465	0.818182	-0.200671	0.572917	-0.557015	1.11765	0.111226
282170	27	39	0	1	1	0	17.5781	0	0	1	1	0	0	0	0	0	0	0	0	0	0	1.29	1.94	0.9	1.02	1.66	1.38	12	12	12	16	16	16	1.31633	0.274845	2.02083	0.70351	0.9	-0.105361	1.0303	0.029853	1.67677	0.516868	1.36634	0.312133
282703	26	39	1	1	1	0	21.3333	0	0	0	0	0	0	0	0	0	0	0	0	0	0	1.46	0.52	1.2	1.37	0.4	1.18	13	13	13	17	17	17	1.4898	0.398639	0.541667	-0.613104	1.2	0.182322	1.38384	0.324861	0.416667	-0.875469	1.15686	0.145712
282707	31	40	0	1	1	1	18.3594	0	1	1	1	0	0	0	0	0	0	1	0	0	0	0.73	2.36	1.1	1.49	0.96	1.09	12	12	12	16	16	16	0.744898	-0.294508	2.45833	0.899484	1.1	0.0953102	1.50505	0.408826	0.969697	-0.0307717	1.07921	0.0762274
282731	26	40	0	1	1	1	18.7879	0	0	1	1	0	0	0	0	0	0	1	0	0	0	0.76	0.95	1.1	0.98	1.13	1.24	13	13	13	19	19	19	0.77551	-0.254234	0.989583	-0.0104713	1.1	0.0953102	0.989899	-0.0101524	1.15306	0.14242	1.19231	0.175891
281122	26	39	0	1	1	1	22.0604	0	0	0	0	0	0	0	0	0	0	0	0	0	0	1.25	0.34	0.9	0.84	0.38	0.6	12	12	12	16	16	16	1.27551	0.243346	0.354167	-1.03799	0.9	-0.105361	0.848485	-0.164303	0.383838	-0.957534	0.594059	-0.520776
281139	34	41	1	1	1	1	19.6146	0	1	0	0	0	0	0	0	0	0	0	0	0	0	0.6	0.56	1.1	1.17	0.73	0.62	13	13	13	18	18	18	0.612245	-0.490623	0.583333	-0.538997	1.1	0.0953102	1.18182	0.167054	0.776596	-0.252835	0.590476	-0.526826
281157	29	39	0	1	1	1	20.4444	0	0	1	1	0	0	0	0	0	0	0	0	0	0	0.81	1.86	0.9	1.23	1.35	1.02	12	12	12	17	17	17	0.826531	-0.190518	1.9375	0.661398	0.9	-0.105361	1.24242	0.217065	1.40625	0.340927	1	0
281200	25	38	1	1	1	1	23.4221	0	1	1	1	0	0	0	0	0	0	1	0	0	0	0.52	0.53	0.6	1.18	0.68	1.58	13	13	13	18	18	18	0.530612	-0.633724	0.552083	-0.594056	0.6	-0.510826	1.19192	0.175565	0.723404	-0.323787	1.50476	0.408635
281206	34	40	0	1	1	1	18.9069	0	0	0	0	0	0	0	0	0	0	1	0	0	0	1.96	1.34	0.7	0.82	1.63	1.32	11	11	11	15	15	15	2.06316	0.724238	1.36735	0.312872	0.7	-0.356675	0.82	-0.198451	1.56731	0.449359	1.34694	0.297834
281703	30	41	1	1	0	0	19.8791	0	1	1	1	0	0	0	0	0	0	0	0	0	0	1.26	0.5	0.9	1.11	0.76	1.05	13	13	13	19	19	19	1.28571	0.251314	0.520833	-0.652325	0.9	-0.105361	1.12121	0.11441	0.77551	-0.254234	1.00962	0.00956945
281716	30	38	1	1	1	0	20.5049	0	0	0	0	0	0	0	0	0	0	0	0	0	0	0.88	1.19	0.9	0.75	1.44	1.09	12	12	12	17	17	17	0.897959	-0.107631	1.23958	0.214775	0.9	-0.105361	0.757576	-0.277632	1.5	0.405465	1.06863	0.0663751
281732	25	37	1	1	0	0	24.3865	0	0	1	1	0	0	0	0	0	0	0	0	0	0	1.08	0.39	1.3	1	0.46	1.3	12	12	12	17	17	17	1.10204	0.0971637	0.40625	-0.900787	1.3	0.262364	1.0101	0.0100503	0.479167	-0.735707	1.27451	0.242562
183514	30	39	1	1	1	1	18.3143	0	1	0	0	0	0	0	0	0	0	1	0	0	0	1.64	0.38	1.1	0.78	0.49	1.16	12	12	12	17	17	17	1.67347	0.514899	0.395833	-0.926762	1.1	0.0953102	0.787879	-0.238411	0.510417	-0.672528	1.13725	0.128617
281767	29	39	0	1	0	1	21.2279	0	1	0	0	0	0	0	0	1	0	0	0	0	0	0.81	0.51	0.9	0.75	0.43	1.03	14	14	14	18	18	18	0.771429	-0.259511	0.548387	-0.600774	0.9	-0.105361	0.757576	-0.277632	0.457447	-0.782095	0.980952	-0.0192314
107282	35	39	0	1	1	1	21.6713	0	1	1	0	0	0	0	0	1	0	1	0	0	0	0.59	0.79	0.8	0.75	1.07	0.86	13	13	13	17	17	17	0.602041	-0.50743	0.822917	-0.1949	0.8	-0.223144	0.757576	-0.277632	1.11458	0.108481	0.843137	-0.170626
281615	21	39	1	1	0	0	18.9866	0	0	0	1	0	0	0	0	0	0	0	0	0	0	0.96	0.64	1	0.76	0.71	1.04	13	13	13	17	17	17	0.979592	-0.0206193	0.666667	-0.405465	1	0	0.767677	-0.264387	0.739583	-0.301668	1.01961	0.0194181
281616	25	39	0	1	0	0	19.5006	0	0	0	1	0	0	0	0	0	0	0	0	0	0	0.27	0.32	1.2	0.77	0.38	0.99	12	12	12	16	16	16	0.27551	-1.28913	0.333333	-1.09861	1.2	0.182322	0.777778	-0.251314	0.383838	-0.957534	0.980198	-0.0200007
281660	28	40	0	0	0	1	18.2899	0	0	0	0	0	0	0	0	0	0	0	0	0	0	0.8	1.01	0.9	1.31	0.68	1.22	12	12	12	16	16	16	0.816327	-0.202941	1.05208	0.0507723	0.9	-0.105361	1.32323	0.280077	0.686869	-0.375612	1.20792	0.188901
281683	29	39	1	1	1	1	20.1286	0	0	1	1	0	0	0	0	0	0	0	0	0	0	0.64	1.74	1.2	1.04	1.82	1.55	12	12	12	16	16	16	0.653061	-0.426084	1.8125	0.594707	1.2	0.182322	1.05051	0.049271	1.83838	0.608887	1.53465	0.428305
227240	28	39	0	1	1	1	17.9688	0	1	0	0	0	0	0	0	0	0	0	0	0	0	0.93	0.41	1.3	1.15	0.55	1.25	12	12	12	16	16	16	0.94898	-0.052368	0.427083	-0.850776	1.3	0.262364	1.16162	0.149812	0.555556	-0.587787	1.23762	0.213193
184035	28	40	1	1	0	0	21.4844	0	1	1	1	0	0	0	0	0	0	1	0	0	0	0.54	0.64	1.2	0.99	0.82	0.94	12	12	12	17	17	17	0.55102	-0.595983	0.666667	-0.405465	1.2	0.182322	1	0	0.854167	-0.157629	0.921569	-0.081678
282247	31	39	1	1	1	1	20.5761	0	1	0	0	0	0	0	0	1	0	0	0	0	0	1.14	2.1	1	1.18	2.64	0.98	13	13	13	17	17	17	1.16327	0.151231	2.1875	0.782759	1	0	1.19192	0.175565	2.75	1.0116	0.960784	-0.0400053
282279	26	40	1	1	1	1	21.5045	0	0	0	0	0	0	0	0	0	0	0	0	1	0	0.98	2.9	1.1	0.82	3.47	1.49	13	13	13	17	17	17	1	0	3.02083	1.10553	1.1	0.0953102	0.828283	-0.188401	3.61458	1.28498	1.46078	0.378973
282280	29	40	1	1	0	1	18.7962	0	0	0	1	0	0	0	0	0	0	0	0	0	0	1.33	0.31	1	0.79	0.29	1.07	12	12	12	16	16	16	1.35714	0.305382	0.322917	-1.13036	1	0	0.79798	-0.225672	0.292929	-1.22782	1.05941	0.0577083
191613	31	39	1	1	0	1	29.0943	0	0	0	1	0	0	0	0	0	0	0	0	0	0	0.91	1.16	0.8	1.4	0.84	1.3	13	13	13	17	17	17	0.928571	-0.074108	1.20833	0.189242	0.8	-0.223144	1.41414	0.346523	0.875	-0.133531	1.27451	0.242562
280659	30	37	0	1	0	1	23.4602	0	1	0	0	0	0	0	0	0	0	0	0	0	0	0.61	0.78	0.9	1.97	1.47	1.41	12	12	12	16	16	16	0.622449	-0.474094	0.8125	-0.207639	0.9	-0.105361	1.9899	0.688084	1.48485	0.395313	1.39604	0.333639
280720	34	39	1	1	0	1	17.0118	0	1	0	0	0	0	0	0	1	0	0	0	0	0	0.47	1.29	0.9	1.25	1.15	0.85	12	12	12	17	17	17	0.479592	-0.73482	1.34375	0.295464	0.9	-0.105361	1.26263	0.233194	1.19792	0.180584	0.833333	-0.182322
281213	28	39	1	1	1	1	17.7375	0	0	0	0	0	0	0	0	0	0	0	0	0	0	0.94	0.63	1	1.05	0.83	0.88	12	12	12	16	16	16	0.959184	-0.0416727	0.65625	-0.421213	1	0	1.06061	0.0588405	0.838384	-0.176279	0.871287	-0.137784
159528	30	39	1	1	1	1	19.8141	0	1	1	1	0	0	0	0	0	0	0	0	0	0	1.36	0.9	0.8	0.77	0.6	1.18	12	12	12	16	16	16	1.38776	0.327687	0.9375	-0.0645385	0.8	-0.223144	0.777778	-0.251314	0.606061	-0.500775	1.16832	0.155564
281216	30	41	0	1	1	1	20.9625	0	0	0	1	0	0	0	0	0	0	0	0	0	0	1.41	1.12	0.8	0.55	1.13	1.33	13	13	13	17	17	17	1.43878	0.363792	1.16667	0.154151	0.8	-0.223144	0.555556	-0.587787	1.17708	0.16304	1.30392	0.265376
210755	29	41	0	1	1	1	24.0882	0	1	0	1	0	0	0	0	0	0	0	0	0	0	1.43	0.53	1.5	0.83	0.58	1.35	13	13	13	17	17	17	1.45918	0.377877	0.552083	-0.594056	1.5	0.405465	0.838384	-0.176279	0.604167	-0.503905	1.32353	0.280302
283016	30	38	1	1	0	0	18.7962	0	1	1	1	0	0	0	0	0	0	0	0	0	0	0.95	0.44	1.2	0.47	0.63	0.84	12	12	12	16	16	16	0.969388	-0.0310906	0.458333	-0.780159	1.2	0.182322	0.474747	-0.744972	0.636364	-0.451985	0.831683	-0.184304
282376	28	40	0	1	0	0	21.0938	0	1	0	0	0	0	0	0	0	0	1	0	0	0	1.93	0.59	1	0.91	0.54	1.22	12	12	12	16	16	16	1.96939	0.677723	0.614583	-0.486811	1	0	0.919192	-0.0842603	0.545455	-0.606136	1.20792	0.188901
283035	29	40	1	1	1	0	19.1327	0	0	0	1	0	0	0	1	0	0	0	0	0	0	1.45	0.87	1.1	0.77	1.15	1.33	13	13	13	17	17	17	1.47959	0.391766	0.90625	-0.0984401	1.1	0.0953102	0.777778	-0.251314	1.19792	0.180584	1.30392	0.265376
284973	25	40	1	1	0	1	20.5744	0	0	1	1	0	0	0	0	0	0	0	0	0	0	0.99	0.45	0.7	1	0.39	1.66	12	12	12	16	16	16	1.0102	0.0101524	0.46875	-0.757686	0.7	-0.356675	1.0101	0.0100503	0.393939	-0.931558	1.64356	0.496867
285013	27	39	0	1	1	1	23.7332	0	0	1	0	0	0	0	0	0	0	0	0	0	0	0.98	0.44	1.1	0.73	0.48	1.51	13	13	13	17	17	17	1	0	0.458333	-0.780159	1.1	0.0953102	0.737374	-0.30466	0.5	-0.693147	1.48039	0.392307
285015	33	39	0	1	0	1	19.9792	0	1	0	0	0	0	0	0	1	0	0	0	0	0	0.52	0.77	0.9	1	0.82	1.34	12	12	12	16	16	16	0.530612	-0.633724	0.802083	-0.220543	0.9	-0.105361	1.0101	0.0100503	0.828283	-0.188401	1.32673	0.282719
285017	36	39	0	1	0	1	23.7332	0	1	1	1	0	0	0	0	0	0	0	0	0	0	1.64	1.24	0.9	1.1	1.47	1.42	11	11	11	15	15	15	1.72632	0.54599	1.26531	0.235314	0.9	-0.105361	1.1	0.0953102	1.41346	0.346042	1.44898	0.37086
282084	28	39	1	1	1	1	23.4852	0	0	0	0	0	0	0	0	0	0	1	0	0	0	0.79	3.4	0.9	1.22	6.18	1.62	12	12	12	16	16	16	0.806122	-0.21552	3.54167	1.2646	0.9	-0.105361	1.23232	0.208901	6.24242	1.83137	1.60396	0.472476
186758	32	39	0	1	1	0	18.3143	0	1	0	0	0	0	0	0	0	0	0	0	0	0	0.74	1.35	0.8	0.52	1.17	0.71	12	12	12	16	16	16	0.755102	-0.280902	1.40625	0.340927	0.8	-0.223144	0.525253	-0.643876	1.18182	0.167054	0.70297	-0.352441
272172	32	40	1	1	1	0	19.6052	0	0	1	1	0	0	0	0	0	0	0	0	0	0	1.07	0.91	1.2	0.98	0.86	1.2	12	12	12	16	16	16	1.09184	0.0878614	0.947917	-0.0534887	1.2	0.182322	0.989899	-0.0101524	0.868687	-0.140773	1.18812	0.172371
282160	30	41	0	1	1	0	21.004	0	0	0	0	0	0	0	0	0	0	0	0	0	0	1.76	1.83	1	0.81	1.76	1.11	13	13	13	17	17	17	1.79592	0.585517	1.90625	0.645138	1	0	0.818182	-0.200671	1.83333	0.606136	1.08824	0.0845574
215168	32	40	1	1	0	1	21.2891	0	1	0	0	0	0	0	0	0	0	1	0	0	0	0.44	0.4	1.1	1.49	0.33	1.31	13	13	13	17	17	17	0.44898	-0.800778	0.416667	-0.875469	1.1	0.0953102	1.50505	0.408826	0.34375	-1.06784	1.28431	0.250225
270551	25	39	1	1	1	0	19.7778	0	0	0	1	0	0	0	0	0	0	0	0	0	0	0.78	3.94	0.9	0.56	1.64	0.84	13	13	13	19	19	19	0.795918	-0.228259	4.10417	1.412	0.9	-0.105361	0.565657	-0.569768	1.67347	0.514899	0.807692	-0.213574
281728	19	40	1	1	0	0	18.0716	0	0	1	1	0	0	0	0	0	0	0	0	0	0	0.68	0.57	1.1	1.18	0.84	1.42	14	14	14	18	18	18	0.647619	-0.434453	0.612903	-0.489548	1.1	0.0953102	1.19192	0.175565	0.893617	-0.112478	1.35238	0.301867
281792	28	38	0	1	0	0	18.8649	0	1	0	0	0	0	0	0	0	0	0	0	0	0	0.79	0.84	1.1	0.61	0.6	1.22	12	12	12	17	17	17	0.806122	-0.21552	0.875	-0.133531	1.1	0.0953102	0.616162	-0.484246	0.625	-0.470004	1.19608	0.179048
296018	22	40	1	1	0	0	17.3569	0	1	0	0	0	0	0	0	0	0	0	0	0	0	1.47	0.77	1.1	2.07	1.33	0.83	12	12	12	16	16	16	1.5	0.405465	0.802083	-0.220543	1.1	0.0953102	2.09091	0.737599	1.34343	0.295229	0.821782	-0.19628
296033	29	38	1	1	1	1	27.8876	0	0	1	1	0	0	0	0	0	0	0	0	0	0	0.46	1.13	0.9	1.37	2.28	0.64	13	13	13	17	17	17	0.469388	-0.756326	1.17708	0.16304	0.9	-0.105361	1.38384	0.324861	2.375	0.864997	0.627451	-0.46609
296041	31	39	0	1	1	1	20.4401	0	0	0	0	0	0	0	0	0	0	0	0	0	0	1.1	0.74	1.1	0.81	0.69	0.9	12	12	12	16	16	16	1.12245	0.115513	0.770833	-0.260283	1.1	0.0953102	0.818182	-0.200671	0.69697	-0.361013	0.891089	-0.115311
154773	38	38	1	1	1	1	18.4265	0	1	0	0	0	0	0	0	0	0	0	0	0	0	0.82	0.43	1.3	1.08	0.58	0.92	12	12	12	16	16	16	0.836735	-0.178248	0.447917	-0.803148	1.3	0.262364	1.09091	0.0870114	0.585859	-0.534677	0.910891	-0.0933319
296111	27	37	1	1	0	0	17.4854	0	0	0	1	0	0	0	0	0	0	1	0	0	0	0.77	0.9	1.1	1.33	1.61	0.76	12	12	12	16	16	16	0.785714	-0.241162	0.9375	-0.0645385	1.1	0.0953102	1.34343	0.295229	1.62626	0.486285	0.752475	-0.284387
298054	28	40	0	1	0	0	23.3355	0	0	1	1	0	0	0	0	0	0	0	0	0	0	0.99	0.63	0.9	1.13	0.77	1.2	12	12	12	16	16	16	1.0102	0.0101524	0.65625	-0.421213	0.9	-0.105361	1.14141	0.132268	0.777778	-0.251314	1.18812	0.172371
257247	25	40	1	1	1	0	18.6709	0	0	0	0	0	0	0	0	0	0	1	0	0	0	0.66	0.62	0.8	1.5	0.88	0.67	12	12	12	17	17	17	0.673469	-0.395313	0.645833	-0.437214	0.8	-0.223144	1.51515	0.415515	0.916667	-0.0870114	0.656863	-0.42028
257437	25	41	0	1	1	0	21.875	0	0	0	0	0	0	0	0	0	0	0	0	0	0	0.81	2.45	0.9	0.63	2.94	0.68	13	13	13	16	16	16	0.826531	-0.190518	2.55208	0.93691	0.9	-0.105361	0.636364	-0.451985	2.9697	1.08846	0.673267	-0.395613
256809	29	41	0	0	1	0	22.0317	0	0	0	0	0	0	0	0	0	0	0	0	0	0	2.43	1.3	0.9	0.84	0.85	1.41	13	13	13	17	17	17	2.47959	0.908094	1.35417	0.303186	0.9	-0.105361	0.848485	-0.164303	0.885417	-0.121697	1.38235	0.323787
256964	33	39	0	1	1	0	23.7332	0	1	0	0	0	0	0	0	0	0	0	0	0	0	1.3	0.75	0.7	1.12	0.69	1.07	12	12	12	16	16	16	1.32653	0.282567	0.78125	-0.24686	0.7	-0.356675	1.13131	0.123379	0.69697	-0.361013	1.05941	0.0577083
256966	29	37	1	1	1	0	22.4766	0	0	0	0	0	0	0	0	0	0	0	0	0	0	0.24	1.14	1.2	1.06	0.55	1.12	12	12	12	18	18	18	0.244898	-1.40691	1.1875	0.17185	1.2	0.182322	1.07071	0.0683192	0.585106	-0.535962	1.06667	0.0645385
298294	26	39	0	1	0	0	18.7328	0	1	0	1	0	0	0	0	1	0	0	0	0	0	1.02	1.2	1	1.14	1.38	1.27	12	12	12	17	17	17	1.04082	0.0400053	1.25	0.223144	1	0	1.15152	0.141079	1.4375	0.362905	1.2451	0.219214
298324	28	39	0	1	0	1	14.1508	0	0	1	1	0	0	0	0	0	0	0	0	0	0	1.6	2.27	0.7	1.26	1.33	1.2	12	12	12	16	16	16	1.63265	0.490206	2.36458	0.860602	0.7	-0.356675	1.27273	0.241162	1.34343	0.295229	1.18812	0.172371
296941	30	38	1	1	0	0	26.5731	0	1	1	0	0	0	0	0	1	0	0	0	0	0	0.57	0.37	1.4	1.06	0.47	0.82	12	12	12	16	16	16	0.581633	-0.541916	0.385417	-0.95343	1.4	0.336472	1.07071	0.0683192	0.474747	-0.744972	0.811881	-0.208401
296971	25	40	1	1	0	0	17.2061	0	0	1	0	0	0	0	0	0	0	0	0	0	0	0.94	1.72	0.8	1.23	1.55	1.29	12	12	12	16	16	16	0.959184	-0.0416727	1.79167	0.583146	0.8	-0.223144	1.24242	0.217065	1.56566	0.448305	1.27723	0.244692
297083	25	39	0	1	0	1	16.5547	0	0	0	1	0	0	0	0	0	0	0	0	0	0	0.68	0.39	1	0.7	0.5	1.32	12	12	12	15	15	15	0.693878	-0.36546	0.40625	-0.900787	1	0	0.7	-0.356675	0.480769	-0.732368	1.34694	0.297834
298154	25	41	1	1	1	1	16.8242	0	0	0	1	0	0	0	0	0	0	0	0	0	0	0.62	1.07	0.9	1.08	0.75	1.03	13	13	13	20	20	20	0.632653	-0.457833	1.11458	0.108481	0.9	-0.105361	1.06931	0.0670107	0.815217	-0.2043	0.962617	-0.0380998
244592	28	39	1	1	1	0	20.83	0	0	0	0	0	0	0	0	0	0	0	0	0	0	1.06	0.57	1	1.1	0.53	1.1	13	13	13	17	17	17	1.08163	0.0784716	0.59375	-0.521297	1	0	1.11111	0.105361	0.552083	-0.594056	1.07843	0.0755076
255523	30	39	0	1	1	0	21.1927	0	1	0	0	0	0	0	0	0	0	0	0	0	0	1.36	1.6	1.3	1.35	0.93	1.52	13	13	13	18	18	18	1.38776	0.327687	1.66667	0.510826	1.3	0.262364	1.36364	0.310155	0.989362	-0.0106953	1.44762	0.36992
255751	23	40	1	1	1	0	20.4294	0	0	0	0	0	0	0	0	0	0	0	0	0	0	1.27	1.55	0.9	1.12	1.57	1.28	12	12	12	17	17	17	1.29592	0.25922	1.61458	0.479077	0.9	-0.105361	1.13131	0.123379	1.63542	0.491898	1.2549	0.227057
256999	27	38	1	1	1	0	20.5693	0	0	0	0	0	0	0	0	0	0	0	0	0	0	0.45	0.35	0.9	1.01	0.58	1.24	12	12	12	16	16	16	0.459184	-0.778305	0.364583	-1.009	0.9	-0.105361	1.0202	0.0200007	0.585859	-0.534677	1.22772	0.205161
257479	33	39	0	1	1	0	21.5287	0	1	0	0	0	0	0	0	0	0	0	0	0	0	0.61	1.32	1.2	0.83	1.94	1.57	12	12	12	17	17	17	0.622449	-0.474094	1.375	0.318454	1.2	0.182322	0.838384	-0.176279	2.02083	0.70351	1.53922	0.431273
257524	32	39	1	1	0	0	21.2306	0	0	0	0	0	0	0	1	0	0	1	0	0	0	0.86	0.31	1.2	1.17	0.24	1.47	13	13	13	18	18	18	0.877551	-0.13062	0.322917	-1.13036	1.2	0.182322	1.18182	0.167054	0.255319	-1.36524	1.4	0.336472
256340	23	39	0	1	0	0	18.4911	0	0	0	0	0	0	0	0	0	0	0	0	0	0	1.22	1.2	0.7	1.7	1.21	1.1	12	12	12	17	17	17	1.2449	0.219054	1.25	0.223144	0.7	-0.356675	1.71717	0.540679	1.26042	0.231442	1.07843	0.0755076
166143	41	37	1	0	1	0	24.0346	0	1	0	0	0	0	0	0	0	0	0	0	0	0	0.92	0.77	1.2	1.46	0.78	1.15	13	13	13	17	17	17	0.938776	-0.0631789	0.802083	-0.220543	1.2	0.182322	1.47475	0.388487	0.8125	-0.207639	1.12745	0.119959
296413	19	38	1	1	1	0	18.0662	0	1	1	1	0	0	0	0	0	0	1	0	0	0	1.45	2.6	1.2	0.97	2.96	0.93	13	13	13	19	19	19	1.47959	0.391766	2.70833	0.996333	1.2	0.182322	0.979798	-0.0204089	3.02041	1.10539	0.894231	-0.111791
296471	31	39	1	1	1	1	23.0425	0	0	0	0	0	0	0	0	0	0	0	0	0	0	0.91	0.42	0.9	1.08	0.55	1.12	12	12	12	16	16	16	0.928571	-0.074108	0.4375	-0.826679	0.9	-0.105361	1.09091	0.0870114	0.555556	-0.587787	1.10891	0.103378
296489	27	38	0	1	1	1	16.937	0	0	1	0	0	0	0	0	0	0	0	0	0	0	1.27	0.66	0.8	1.02	0.46	0.82	12	12	12	16	16	16	1.29592	0.25922	0.6875	-0.374693	0.8	-0.223144	1.0303	0.029853	0.464646	-0.766478	0.811881	-0.208401
226497	33	38	1	1	1	1	23.7253	0	1	1	0	0	0	0	0	0	0	1	0	1	0	0.69	1.57	1.3	0.79	2.14	1.3	13	13	13	15	15	15	0.704082	-0.350861	1.63542	0.491898	1.3	0.262364	0.79	-0.235722	2.05769	0.721585	1.32653	0.282567
301203	34	39	1	1	0	0	24.7475	0	1	1	0	0	0	0	0	1	0	1	0	0	0	1.12	1.68	0.9	0.72	1.89	1.07	12	12	12	16	16	16	1.14286	0.133531	1.75	0.559616	0.9	-0.105361	0.727273	-0.318454	1.90909	0.646627	1.05941	0.0577083
301206	24	37	0	1	0	1	20.8117	0	0	0	0	0	0	0	0	0	0	1	0	0	0	0.84	0.45	1	1.18	0.58	1.17	14	14	14	16	16	16	0.8	-0.223144	0.483871	-0.725937	1	0	1.19192	0.175565	0.585859	-0.534677	1.15842	0.147053
301217	27	41	0	1	1	1	18.2222	0	0	1	0	0	0	0	0	0	0	0	0	0	0	0.6	1.44	0.7	0.99	0.86	0.99	12	12	12	17	17	17	0.612245	-0.490623	1.5	0.405465	0.7	-0.356675	1	0	0.895833	-0.110001	0.970588	-0.029853
255719	25	41	1	1	0	0	24.7475	0	0	0	0	0	0	0	0	0	0	0	0	0	0	1.19	0.43	1.3	1.26	0.55	1.14	13	13	13	16	16	16	1.21429	0.194156	0.447917	-0.803148	1.3	0.262364	1.27273	0.241162	0.555556	-0.587787	1.12871	0.121078
255755	31	38	1	1	1	0	19.9481	0	1	0	0	0	0	0	0	0	0	0	0	0	0	0.7	1.18	0.9	0.78	0.65	1.08	14	14	14	18	18	18	0.666667	-0.405465	1.26882	0.238085	0.9	-0.105361	0.787879	-0.238411	0.691489	-0.368908	1.02857	0.0281709
255778	29	39	0	1	1	0	28.6412	0	0	0	0	0	0	0	0	0	0	0	0	0	0	1.5	0.67	1.1	1.23	0.82	1.13	13	13	13	17	17	17	1.53061	0.425668	0.697917	-0.359656	1.1	0.0953102	1.24242	0.217065	0.854167	-0.157629	1.10784	0.102415
244615	25	36	1	1	1	0	19.433	0	0	0	0	1	0	1	0	0	0	0	0	0	0	1.4	2.44	1.6	1.55	1.96	1.02	12	12	12	16	16	16	1.42857	0.356675	2.54167	0.93282	1.6	0.470004	1.56566	0.448305	1.9798	0.682995	1.0099	0.0098523
255885	25	40	1	1	0	0	22.1893	0	0	0	0	0	0	0	0	0	0	0	0	0	0	0.48	0.73	1.2	1.23	0.72	1.12	14	14	14	18	18	18	0.457143	-0.782759	0.784946	-0.24214	1.2	0.182322	1.24242	0.217065	0.765957	-0.266629	1.06667	0.0645385
256366	30	39	1	1	1	0	18.8189	0	0	0	0	0	0	0	0	0	0	0	0	0	0	0.96	0.65	1.1	0.79	0.7	1.67	13	13	13	17	17	17	0.979592	-0.0206193	0.677083	-0.389961	1.1	0.0953102	0.79798	-0.225672	0.729167	-0.315853	1.63725	0.493021
256452	30	40	0	1	0	0	18.591	0	1	0	0	0	0	0	0	0	0	0	0	0	0	2.32	0.98	1	1.07	0.93	1.19	13	13	13	19	19	19	2.36735	0.86177	1.02083	0.0206193	1	0	1.08081	0.077709	0.94898	-0.052368	1.14423	0.134733
256970	30	39	0	1	0	0	23.1473	0	0	0	0	0	0	0	0	0	0	0	0	0	0	1.91	0.65	1	0.71	0.65	1.05	14	14	14	19	14	19	1.81905	0.598313	0.698925	-0.358212	1	0	0.717172	-0.33244	0.613208	-0.489052	1.00962	0.00956945
250909	33	37	1	1	1	0	23.3091	0	1	0	0	0	0	0	0	0	0	1	0	0	0	0.69	1.56	0.5	1.09	1.26	1.05	12	12	12	16	16	16	0.704082	-0.350861	1.625	0.485508	0.5	-0.693147	1.10101	0.096228	1.27273	0.241162	1.0396	0.0388398
132783	24	39	0	1	1	0	20.9572	0	1	0	0	0	0	0	0	0	0	0	0	0	0	0.44	1.15	1	0.53	1.14	1.61	12	12	12	16	16	16	0.44898	-0.800778	1.19792	0.180584	1	0	0.535354	-0.624828	1.15152	0.141079	1.59406	0.466284
257094	25	41	1	1	0	0	21.6311	0	0	0	0	0	0	0	0	0	0	1	0	0	0	2.31	2.39	0.9	1.47	2.68	1.09	13	13	13	17	17	17	2.35714	0.85745	2.48958	0.912115	0.9	-0.105361	1.48485	0.395313	2.79167	1.02664	1.06863	0.0663751
197828	29	39	0	1	1	0	19.5918	0	1	0	0	0	0	0	0	0	0	0	0	0	0	1.94	0.73	0.5	1.25	0.95	1.19	14	14	14	17	17	17	1.84762	0.613898	0.784946	-0.24214	0.5	-0.693147	1.26263	0.233194	0.989583	-0.0104713	1.16667	0.154151
256799	23	39	0	1	1	0	22.0317	0	1	0	0	0	0	0	0	0	0	0	0	0	0	1.22	1.3	0.7	1.26	1.03	0.94	11	11	11	15	15	15	1.28421	0.250144	1.32653	0.282567	0.7	-0.356675	1.26	0.231112	0.990385	-0.00966191	0.959184	-0.0416727
301219	30	35	1	1	0	1	29.4808	0	1	1	1	1	0	1	0	1	0	1	0	0	0	1.06	0.81	0.7	1.59	0.83	0.7	12	12	12	16	16	16	1.08163	0.0784716	0.84375	-0.169899	0.7	-0.356675	1.60606	0.473784	0.838384	-0.176279	0.693069	-0.366625
298966	31	36	0	1	1	1	20.7031	0	0	0	0	1	0	1	1	0	0	1	0	0	0	0.47	0.52	1.6	1.24	0.58	0.95	12	12	12	16	16	16	0.479592	-0.73482	0.541667	-0.613104	1.6	0.470004	1.25253	0.225162	0.585859	-0.534677	0.940594	-0.0612436
255439	29	37	0	1	1	0	21.8106	0	1	0	0	0	0	0	0	0	0	0	0	0	0	0.99	1.41	0.9	1.1	1.11	1.37	12	12	12	16	16	16	1.0102	0.0101524	1.46875	0.384412	0.9	-0.105361	1.11111	0.105361	1.12121	0.11441	1.35644	0.30486
109470	22	38	0	1	0	0	21.4536	0	1	0	0	0	0	0	0	0	0	0	0	0	0	0.64	0.51	1.1	1.13	0.48	1.23	12	12	12	17	17	17	0.653061	-0.426084	0.53125	-0.632523	1.1	0.0953102	1.14141	0.132268	0.5	-0.693147	1.20588	0.187212
256168	31	38	0	1	1	0	20.4876	0	0	0	0	0	0	0	0	0	0	0	0	0	0	0.98	1.4	0.8	1.55	2.08	1.65	12	12	13	17	17	17	1	0	1.45833	0.377294	0.8	-0.223144	1.56566	0.448305	2.16667	0.77319	1.61765	0.480973
256197	26	34	0	1	0	0	22.1893	0	0	0	0	1	0	1	0	0	0	0	0	1	0	1.91	2.53	0.9	1.36	2.36	1.24	13	13	13	17	17	17	1.94898	0.667306	2.63542	0.969041	0.9	-0.105361	1.37374	0.317535	2.45833	0.899484	1.21569	0.195309
136342	26	40	1	1	0	0	22.6003	0	1	0	0	0	0	0	0	0	0	0	0	0	0	0.99	1.38	1.1	1.39	1.39	1.16	13	13	13	18	18	18	1.0102	0.0101524	1.4375	0.362905	1.1	0.0953102	1.40404	0.339354	1.47872	0.391179	1.10476	0.0996298
256882	27	40	1	1	0	0	18.7305	0	0	0	0	0	0	0	0	0	0	0	0	0	0	0.92	1.59	0.9	0.82	2.25	1.31	12	12	12	16	16	16	0.938776	-0.0631789	1.65625	0.504556	0.9	-0.105361	0.828283	-0.188401	2.27273	0.820981	1.29703	0.260077
256906	26	39	1	1	1	0	19.1327	0	0	0	0	0	0	0	0	0	0	0	0	0	0	0.83	1.3	1.2	1.56	1.49	1.03	13	13	13	17	17	17	0.846939	-0.166127	1.35417	0.303186	1.2	0.182322	1.57576	0.454736	1.55208	0.439598	1.0098	0.00975617
206100	28	40	0	1	1	0	20.0777	0	0	0	0	0	0	0	0	0	0	0	0	0	0	2.14	0.69	1.1	0.75	0.46	1.44	12	12	12	17	17	17	2.18367	0.781009	0.71875	-0.330242	1.1	0.0953102	0.757576	-0.277632	0.479167	-0.735707	1.41176	0.34484
257625	32	38	1	1	1	0	21.7778	0	0	0	0	0	0	0	0	0	0	0	0	0	0	1	0.94	0.9	0.84	0.97	1.36	12	12	12	17	17	17	1.02041	0.0202027	0.979167	-0.0210534	0.9	-0.105361	0.848485	-0.164303	1.01042	0.0103628	1.33333	0.287682
257720	28	37	1	1	1	0	21.3675	0	0	0	0	0	0	0	0	0	0	0	0	0	0	0.42	0.6	0.8	0.92	0.68	0.98	12	12	12	16	16	16	0.428571	-0.847298	0.625	-0.470004	0.8	-0.223144	0.929293	-0.0733313	0.686869	-0.375612	0.970297	-0.030153
296899	29	37	1	0	1	0	24.855	0	0	1	1	0	0	0	0	0	0	0	0	0	0	1.13	0.67	1	0.73	0.49	1.19	13	13	13	16	16	16	1.15306	0.14242	0.697917	-0.359656	1	0	0.737374	-0.30466	0.494949	-0.7033	1.17822	0.164003
112133	31	37	0	1	1	0	22.1669	0	1	1	0	0	0	0	0	0	0	0	0	0	0	0.6	0.41	0.9	0.92	0.32	1.22	13	13	13	17	17	17	0.612245	-0.490623	0.427083	-0.850776	0.9	-0.105361	0.929293	-0.0733313	0.333333	-1.09861	1.19608	0.179048
296961	24	39	0	1	1	1	17.4449	0	0	0	1	0	0	0	0	0	0	0	0	0	0	0.71	0.74	1	1.67	0.82	1.45	13	13	13	17	17	17	0.72449	-0.322288	0.770833	-0.260283	1	0	1.68687	0.522874	0.854167	-0.157629	1.42157	0.351761
297009	27	38	0	1	1	0	18.8707	0	0	0	0	0	0	0	0	0	0	0	0	0	0	0.73	0.38	1	0.84	0.42	1	12	12	12	16	16	16	0.744898	-0.294508	0.395833	-0.926762	1	0	0.848485	-0.164303	0.424242	-0.85745	0.990099	-0.00995033
297031	23	39	1	1	1	0	20.1348	0	0	0	0	0	0	0	0	0	0	0	0	0	0	0.42	1.34	1.4	1.1	1.68	0.75	13	13	13	16	16	16	0.428571	-0.847298	1.39583	0.333492	1.4	0.336472	1.11111	0.105361	1.69697	0.528844	0.742574	-0.297632
284257	29	40	1	1	1	1	19.1953	0	0	1	1	0	0	0	0	0	0	0	0	0	0	1.55	0.46	1	0.89	0.6	0.98	12	12	12	16	16	16	1.58163	0.458458	0.479167	-0.735707	1	0	0.89899	-0.106483	0.606061	-0.500775	0.970297	-0.030153
255650	21	37	1	1	0	0	21.9516	0	0	0	0	0	0	0	0	0	0	0	0	0	0	0.87	1.55	1.1	0.84	1.24	0.77	12	12	12	16	16	16	0.887755	-0.119059	1.61458	0.479077	1.1	0.0953102	0.848485	-0.164303	1.25253	0.225162	0.762376	-0.271315
255675	28	40	0	1	0	0	21.0938	0	1	0	0	0	0	0	0	0	0	0	0	0	0	0.59	0.44	1	1.51	0.53	1.24	14	14	14	18	18	18	0.561905	-0.576423	0.473118	-0.74841	1	0	1.52525	0.42216	0.56383	-0.573003	1.18095	0.166321
255699	26	38	1	1	0	0	19.7239	0	0	0	0	0	0	0	0	0	0	0	0	0	0	1.35	0.44	0.9	1.24	0.75	1.09	11	11	11	17	17	17	1.42105	0.351398	0.44898	-0.800778	0.9	-0.105361	1.25253	0.225162	0.78125	-0.24686	1.06863	0.0663751
197756	30	40	0	1	1	0	19.8791	0	1	0	0	0	0	0	0	0	0	0	0	0	0	1.19	0.72	0.9	2.04	1.28	0.82	14	14	14	21	21	21	1.13333	0.125163	0.774194	-0.255933	0.9	-0.105361	1.99024	0.688257	1.41436	0.34668	0.742081	-0.298296
255762	27	38	1	1	0	0	19.2234	0	1	0	0	0	0	0	0	0	0	1	0	0	0	1.2	2.23	1	1.32	3.27	0.96	12	12	12	16	16	16	1.22449	0.202524	2.32292	0.842824	1	0	1.33333	0.287682	3.30303	1.19484	0.950495	-0.0507723
255834	26	38	1	1	1	0	18.8189	0	0	0	0	0	0	0	0	0	0	0	0	0	0	0.63	0.76	0.7	0.83	0.66	0.96	13	13	13	17	17	17	0.642857	-0.441833	0.791667	-0.233615	0.7	-0.356675	0.838384	-0.176279	0.6875	-0.374693	0.941176	-0.0606246
255837	27	37	1	1	1	0	19.6283	0	0	0	0	0	0	0	0	0	0	0	0	0	0	1.81	0.47	1.1	0.73	0.33	1.32	12	12	12	16	16	16	1.84694	0.61353	0.489583	-0.714201	1.1	0.0953102	0.737374	-0.30466	0.333333	-1.09861	1.30693	0.267681
256070	29	39	0	1	1	0	21.6311	0	1	0	0	0	0	0	0	0	0	0	0	0	0	0.63	1.01	0.9	0.74	1.07	0.71	13	13	13	17	17	17	0.642857	-0.441833	1.05208	0.0507723	0.9	-0.105361	0.747475	-0.291055	1.11458	0.108481	0.696078	-0.362293
112564	33	38	1	1	0	0	19.9481	0	1	0	0	0	0	0	0	0	0	0	0	0	0	0.91	1.61	1.2	1.15	1.24	1.1	12	12	12	16	16	16	0.928571	-0.074108	1.67708	0.517056	1.2	0.182322	1.16162	0.149812	1.25253	0.225162	1.08911	0.0853598
256404	26	37	0	1	1	0	20.2848	0	0	0	0	0	0	0	0	0	0	0	0	0	0	0.99	1.28	0.9	1.31	1.06	1.3	12	12	12	16	16	16	1.0102	0.0101524	1.33333	0.287682	0.9	-0.105361	1.32323	0.280077	1.07071	0.0683192	1.28713	0.252414
161635	31	41	0	1	1	0	22.6409	0	1	0	0	0	0	0	0	0	0	0	0	0	0	1.65	1.22	0.9	1.1	2.03	1.01	12	12	12	17	17	17	1.68367	0.520978	1.27083	0.239673	0.9	-0.105361	1.11111	0.105361	2.11458	0.748858	0.990196	-0.0098523
162615	29	38	0	1	0	0	20.4294	0	1	0	0	0	0	0	0	0	0	0	0	0	0	1.62	1.09	1.3	1.06	0.94	1.19	13	13	13	16	16	16	1.65306	0.502629	1.13542	0.127	1.3	0.262364	1.07071	0.0683192	0.949495	-0.0518251	1.17822	0.164003
257109	22	37	0	1	0	0	18.7328	0	0	0	0	0	0	0	0	0	0	0	0	0	0	1.01	0.85	1	0.7	1.01	0.94	13	13	13	17	17	17	1.03061	0.030153	0.885417	-0.121697	1	0	0.707071	-0.346625	1.05208	0.0507723	0.921569	-0.081678
257220	30	39	0	1	0	0	36.6285	0	1	0	0	0	0	0	0	0	0	1	0	0	0	0.46	1.11	1	1.01	0.94	0.74	13	13	13	18	18	18	0.469388	-0.756326	1.15625	0.145182	1	0	1.0202	0.0200007	1	0	0.704762	-0.349895
151597	31	39	1	1	0	1	20.061	0	1	1	1	0	0	0	0	0	0	0	0	0	0	0.34	0.64	0.7	1.34	1.05	1.19	12	12	12	16	16	16	0.346939	-1.05861	0.666667	-0.405465	0.7	-0.356675	1.35354	0.30272	1.06061	0.0588405	1.17822	0.164003
280707	25	39	0	1	1	0	20.8889	0	0	1	0	0	0	0	0	0	0	0	0	0	0	1.21	2.08	1.3	1.1	1.88	1.3	12	12	12	16	16	16	1.23469	0.210823	2.16667	0.77319	1.3	0.262364	1.11111	0.105361	1.89899	0.641322	1.28713	0.252414
296165	24	40	1	1	1	1	22.4277	0	0	1	1	0	0	0	0	0	0	0	0	0	0	1.34	0.87	1.1	1.1	0.74	0.72	13	13	13	17	17	17	1.36735	0.312872	0.90625	-0.0984401	1.1	0.0953102	1.11111	0.105361	0.770833	-0.260283	0.705882	-0.348307
296191	23	39	0	1	1	1	18.0324	0	0	0	0	0	0	0	0	0	0	0	0	0	0	1.65	0.93	1	0.95	0.81	1.01	12	12	12	16	16	16	1.68367	0.520978	0.96875	-0.0317487	1	0	0.959596	-0.041243	0.818182	-0.200671	1	0
296225	29	39	1	1	1	1	18.4592	0	0	0	0	0	0	0	0	0	0	0	0	0	0	0.72	1.45	1.1	1.8	1.16	1.38	13	13	13	17	17	17	0.734694	-0.308301	1.51042	0.412386	1.1	0.0953102	1.81818	0.597837	1.20833	0.189242	1.35294	0.302281
296237	23	41	0	1	0	1	24.4646	0	0	1	1	0	0	0	0	0	0	0	0	0	0	1.91	1.88	1	1.24	2.76	1.31	13	13	13	17	17	17	1.94898	0.667306	1.95833	0.672094	1	0	1.25253	0.225162	2.875	1.05605	1.28431	0.250225
255947	29	39	0	1	1	0	21.83	0	0	0	0	0	0	0	0	0	0	0	0	0	0	1.03	0.74	1.1	0.87	0.89	1.07	12	12	12	16	16	16	1.05102	0.0497615	0.770833	-0.260283	1.1	0.0953102	0.878788	-0.129212	0.89899	-0.106483	1.05941	0.0577083
174658	28	39	0	1	0	0	19.9792	0	1	0	0	0	0	0	0	0	0	1	0	0	0	1.37	0.34	0.9	0.86	0.42	0.71	12	12	12	17	17	17	1.39796	0.335013	0.354167	-1.03799	0.9	-0.105361	0.868687	-0.140773	0.4375	-0.826679	0.696078	-0.362293
255479	32	37	0	1	0	0	19.4771	0	1	0	0	0	0	0	1	0	0	0	0	0	0	0.81	0.6	0.9	2.08	1.08	1.43	12	12	12	17	17	17	0.826531	-0.190518	0.625	-0.470004	0.9	-0.105361	2.10101	0.742418	1.125	0.117783	1.40196	0.337872
256241	26	39	0	1	0	0	19.7777	0	0	0	0	0	0	0	0	0	0	1	0	0	0	1.24	1.26	0.6	0.56	1.23	1.3	12	12	12	16	16	16	1.26531	0.235314	1.3125	0.271934	0.6	-0.510826	0.565657	-0.569768	1.24242	0.217065	1.28713	0.252414
256342	28	37	0	1	1	0	20.5693	0	0	0	0	0	0	0	0	0	0	0	0	0	0	1.12	0.85	0.6	1.13	0.86	1.14	13	13	13	17	17	17	1.14286	0.133531	0.885417	-0.121697	0.6	-0.510826	1.14141	0.132268	0.895833	-0.110001	1.11765	0.111226
256444	30	39	1	1	1	0	20.3244	0	1	0	0	0	0	0	0	0	0	1	0	0	0	0.85	3.19	1	1.24	4.19	1.08	12	12	12	16	16	16	0.867347	-0.142316	3.32292	1.20084	1	0	1.25253	0.225162	4.23232	1.44275	1.06931	0.0670107
256645	32	40	1	1	1	0	20.7031	0	1	0	0	0	0	0	0	0	0	0	0	0	0	0.34	0.59	1	1.13	0.93	0.96	13	13	13	16	16	16	0.346939	-1.05861	0.614583	-0.486811	1	0	1.14141	0.132268	0.939394	-0.0625204	0.950495	-0.0507723
257851	29	41	1	1	1	0	20.0288	0	0	0	0	0	0	0	0	0	0	0	0	0	0	1.31	0.6	1	1.65	0.73	1.06	13	13	13	17	17	17	1.33673	0.29023	0.625	-0.470004	1	0	1.66667	0.510826	0.760417	-0.273889	1.03922	0.0384663
248753	29	40	0	1	0	0	22.137	0	1	0	0	0	0	0	0	0	0	0	0	0	0	1.01	0.92	1.3	0.74	0.69	1.41	12	12	12	16	16	16	1.03061	0.030153	0.958333	-0.0425596	1.3	0.262364	0.747475	-0.291055	0.69697	-0.361013	1.39604	0.333639
128470	26	40	0	1	1	0	19.9219	0	1	0	0	0	0	0	0	0	0	0	0	0	0	0.57	2.21	0.7	1.07	1.45	1.02	13	13	13	17	17	17	0.581633	-0.541916	2.30208	0.833815	0.7	-0.356675	1.08081	0.077709	1.51042	0.412386	1	0
167794	25	40	1	1	1	0	18.8189	0	1	0	0	0	0	0	0	0	0	0	0	0	0	2.46	1.93	0.8	1.41	1.11	1.24	13	13	13	17	17	17	2.5102	0.920364	2.01042	0.698342	0.8	-0.223144	1.42424	0.35364	1.15625	0.145182	1.21569	0.195309
131141	32	38	1	1	1	0	20.7008	0	1	0	0	0	0	0	0	0	0	0	0	0	0	1.09	1.22	0.7	1.16	0.89	0.84	12	12	12	17	17	17	1.11224	0.10638	1.27083	0.239673	0.7	-0.356675	1.17172	0.15847	0.927083	-0.0757118	0.823529	-0.194156
257209	28	39	1	1	1	0	28.4799	0	0	0	0	0	0	0	0	0	0	1	0	0	0	0.76	0.77	0.8	0.81	0.47	1.01	13	13	13	17	17	17	0.77551	-0.254234	0.802083	-0.220543	0.8	-0.223144	0.818182	-0.200671	0.489583	-0.714201	0.990196	-0.0098523
257314	30	38	1	1	1	0	23.2377	0	1	0	0	0	0	0	0	0	0	0	0	0	0	0.55	0.63	1	1.22	0.67	1.25	12	12	12	16	16	16	0.561224	-0.577634	0.65625	-0.421213	1	0	1.23232	0.208901	0.676768	-0.390427	1.23762	0.213193
297163	30	40	1	1	1	1	18.6453	0	0	0	0	0	0	0	0	0	0	0	0	0	0	0.46	1.39	0.7	0.91	1.19	1.06	12	12	12	16	16	16	0.469388	-0.756326	1.44792	0.370126	0.7	-0.356675	0.919192	-0.0842603	1.20202	0.184004	1.0495	0.0483186
298403	31	39	0	1	1	1	24.1672	0	0	0	0	0	0	0	0	0	0	1	0	0	0	1.08	1.08	1.2	1.25	0.78	0.83	12	12	12	16	16	16	1.10204	0.0971637	1.125	0.117783	1.2	0.182322	1.26263	0.233194	0.787879	-0.238411	0.821782	-0.19628
298424	28	39	1	1	1	1	19.1327	0	0	0	0	0	0	0	0	0	0	1	0	0	0	0.67	1.16	1.3	1.64	1.32	1.99	12	12	12	16	16	16	0.683673	-0.380275	1.20833	0.189242	1.3	0.262364	1.65657	0.504747	1.33333	0.287682	1.9703	0.678184
298427	27	38	0	1	1	1	22.0317	0	0	0	0	0	0	0	0	0	0	0	0	0	0	0.88	0.81	1.1	0.79	0.62	1.06	13	13	13	16	16	16	0.897959	-0.107631	0.84375	-0.169899	1.1	0.0953102	0.79798	-0.225672	0.626263	-0.467985	1.0495	0.0483186
298508	29	40	1	1	1	1	24.4444	0	0	1	1	0	0	0	0	0	0	1	0	0	0	1.07	1	0.9	1.2	0.74	1.27	13	13	13	17	17	17	1.09184	0.0878614	1.04167	0.040822	0.9	-0.105361	1.21212	0.192372	0.770833	-0.260283	1.2451	0.219214
255630	25	41	0	1	0	0	20.5457	0	0	0	0	0	0	0	0	0	0	0	0	0	0	1.96	0.64	0.9	0.99	0.5	1.23	13	13	13	16	16	16	2	0.693147	0.666667	-0.405465	0.9	-0.105361	1	0	0.505051	-0.683097	1.21782	0.197064
230492	26	37	1	1	0	0	19.7232	0	1	0	0	0	0	0	0	0	0	0	0	0	0	1.3	1.31	0.6	1.07	1.55	1.06	13	13	13	17	17	17	1.32653	0.282567	1.36458	0.310849	0.6	-0.510826	1.08081	0.077709	1.61458	0.479077	1.03922	0.0384663
255891	25	38	0	1	0	0	22.8928	0	1	0	0	0	0	0	0	0	0	0	0	0	0	1.07	0.6	1.4	0.76	0.54	1.41	13	13	13	17	17	17	1.09184	0.0878614	0.625	-0.470004	1.4	0.336472	0.767677	-0.264387	0.5625	-0.575364	1.38235	0.323787
22396	39	36	0	1	1	0	23.8054	0	1	0	0	1	0	1	0	0	0	1	0	0	0	0.4	0.64	0.8	1.35	1.53	0.96	13	13	13	18	18	18	0.408163	-0.896088	0.666667	-0.405465	0.8	-0.223144	1.36364	0.310155	1.62766	0.487143	0.914286	-0.0896122
156500	31	41	1	1	1	0	25	0	1	0	0	0	0	0	0	0	0	0	0	0	0	0.99	0.89	1.2	1.02	0.82	1.35	12	12	12	17	17	17	1.0102	0.0101524	0.927083	-0.0757118	1.2	0.182322	1.0303	0.029853	0.854167	-0.157629	1.32353	0.280302
257085	24	39	1	1	0	0	23.8751	0	0	0	0	0	0	0	0	0	0	0	0	0	0	0.61	1.53	1.1	0.91	0.7	1.17	13	13	13	17	17	17	0.622449	-0.474094	1.59375	0.46609	1.1	0.0953102	0.919192	-0.0842603	0.729167	-0.315853	1.14706	0.137201
256196	24	39	0	1	0	0	23.3355	0	0	0	0	0	0	0	0	0	0	1	0	0	0	1.46	0.98	0.7	1.49	1.17	0.96	12	12	12	17	17	17	1.4898	0.398639	1.02083	0.0206193	0.7	-0.356675	1.50505	0.408826	1.21875	0.197826	0.941176	-0.0606246
231676	33	38	0	0	1	0	19.1467	0	1	0	0	0	0	0	0	1	0	0	0	0	0	2.08	0.76	0.8	0.65	0.56	1.36	12	12	12	16	16	16	2.12245	0.752571	0.791667	-0.233615	0.8	-0.223144	0.656566	-0.420733	0.565657	-0.569768	1.34653	0.297534
257018	27	40	0	1	1	0	20.5078	0	0	0	0	0	0	0	0	0	0	0	0	0	0	1.31	1.22	0.8	0.97	2.36	1.25	13	13	13	19	19	19	1.33673	0.29023	1.27083	0.239673	0.8	-0.223144	0.979798	-0.0204089	2.40816	0.878864	1.20192	0.183923
187578	24	38	0	1	1	0	20.889	0	1	0	0	0	0	0	0	0	0	0	0	0	0	0.26	0.87	0.6	2.57	0.83	1.16	13	13	13	17	17	17	0.265306	-1.32687	0.90625	-0.0984401	0.6	-0.510826	2.59596	0.953956	0.864583	-0.145508	1.13725	0.128617
297191	37	39	0	1	1	0	21.5019	0	1	0	0	0	0	0	0	1	0	0	0	0	0	1.36	2.04	1	1.26	1.25	1.15	12	12	12	17	17	17	1.38776	0.327687	2.125	0.753772	1	0	1.27273	0.241162	1.30208	0.263966	1.12745	0.119959
295227	26	38	1	1	0	0	25.3968	0	1	0	0	0	0	0	0	0	0	0	0	0	0	1.29	3.17	0.9	1.39	2.09	1	12	12	12	16	16	16	1.31633	0.274845	3.30208	1.19455	0.9	-0.105361	1.40404	0.339354	2.11111	0.747214	0.990099	-0.00995033
297249	28	39	1	1	1	0	16.2891	0	0	0	0	0	0	0	0	0	0	0	0	0	0	1.13	0.66	1.4	0.84	0.69	0.95	12	12	12	16	16	16	1.15306	0.14242	0.6875	-0.374693	1.4	0.336472	0.848485	-0.164303	0.69697	-0.361013	0.940594	-0.0612436
297252	28	38	1	1	1	1	19.9219	0	0	0	0	0	0	0	0	0	0	1	0	0	0	1.25	1.2	1.1	0.77	1	0.77	12	12	12	16	16	16	1.27551	0.243346	1.25	0.223144	1.1	0.0953102	0.777778	-0.251314	1.0101	0.0100503	0.762376	-0.271315
298582	26	39	0	1	0	1	26.6389	0	1	1	1	0	0	0	0	0	0	0	0	0	0	0.97	1.22	1.4	1.09	1.48	0.95	13	13	13	16	16	16	0.989796	-0.0102565	1.27083	0.239673	1.4	0.336472	1.10101	0.096228	1.49495	0.402092	0.940594	-0.0612436
295743	28	37	0	1	1	0	23.4375	0	0	0	1	0	0	0	0	0	0	0	0	0	0	1.63	1.95	1.1	1.08	2.03	1.1	12	12	12	17	17	17	1.66327	0.508783	2.03125	0.708651	1.1	0.0953102	1.09091	0.0870114	2.11458	0.748858	1.07843	0.0755076
216618	28	38	1	1	0	0	20.5933	0	1	0	0	0	0	0	0	0	0	0	0	0	0	1.31	0.63	0.9	1.35	0.58	1.3	13	13	13	18	18	18	1.33673	0.29023	0.65625	-0.421213	0.9	-0.105361	1.36364	0.310155	0.617021	-0.482852	1.2381	0.213574
281708	31	40	0	1	1	1	21.7784	0	0	0	0	0	0	0	1	0	0	1	0	0	0	0.58	0.61	0.9	1.6	0.74	1.12	12	12	12	16	16	16	0.591837	-0.524524	0.635417	-0.453474	0.9	-0.105361	1.61616	0.480054	0.747475	-0.291055	1.10891	0.103378
296179	29	40	1	1	1	1	22.8928	0	0	1	0	0	0	0	0	0	0	1	0	0	0	0.57	2.92	0.7	1.61	6.44	0.83	12	12	12	16	16	16	0.581633	-0.541916	3.04167	1.11241	0.7	-0.356675	1.62626	0.486285	6.50505	1.87258	0.821782	-0.19628
296181	32	38	0	1	0	1	24.6548	0	0	0	0	0	0	0	0	0	0	1	0	0	0	0.69	0.66	1	1.14	0.88	0.91	13	13	13	17	17	17	0.704082	-0.350861	0.6875	-0.374693	1	0	1.15152	0.141079	0.916667	-0.0870114	0.892157	-0.114113
217725	30	40	0	1	1	1	20.8325	0	0	0	0	0	0	0	0	0	0	0	0	0	0	2.07	2.2	1.2	0.86	1.36	1.29	12	12	12	16	16	16	2.11224	0.747751	2.29167	0.829279	1.2	0.182322	0.868687	-0.140773	1.37374	0.317535	1.27723	0.244692
212439	33	39	0	1	1	1	21.3382	0	1	0	0	0	0	0	0	0	0	0	0	0	0	2.84	1.14	0.9	1.06	0.64	1.25	12	12	12	17	17	17	2.89796	1.06401	1.1875	0.17185	0.9	-0.105361	1.07071	0.0683192	0.666667	-0.405465	1.22549	0.203341
290044	29	38	0	1	0	1	24.974	0	0	0	0	0	0	0	1	0	0	1	0	0	0	1.29	0.46	1.3	0.88	0.35	1.4	12	12	12	17	17	17	1.31633	0.274845	0.479167	-0.735707	1.3	0.262364	0.888889	-0.117783	0.364583	-1.009	1.37255	0.31667
256171	32	39	0	1	1	0	20.3125	0	1	0	0	0	0	0	0	0	0	0	0	0	0	0.41	0.55	1.1	2	0.28	0.89	13	13	13	17	17	17	0.418367	-0.871395	0.572917	-0.557015	1.1	0.0953102	2.0202	0.703198	0.291667	-1.23214	0.872549	-0.136336
254067	33	40	1	1	1	0	19.052	0	1	0	0	0	0	0	0	0	0	0	0	0	0	0.59	0.62	1.3	0.96	0.78	1.03	13	13	13	17	17	17	0.602041	-0.50743	0.645833	-0.437214	1.3	0.262364	0.969697	-0.0307717	0.8125	-0.207639	1.0098	0.00975617
256232	33	39	1	1	1	0	24.7676	0	0	0	0	0	0	0	0	0	0	0	0	0	0	1.89	0.85	0.8	2.13	0.64	1.32	13	13	13	16	16	16	1.92857	0.65678	0.885417	-0.121697	0.8	-0.223144	2.15152	0.766172	0.646465	-0.436237	1.30693	0.267681
255489	24	37	1	1	1	0	19.5312	0	0	0	0	0	0	0	0	0	0	1	0	0	0	1.22	0.34	1	1.34	0.6	1.4	13	13	13	17	17	17	1.2449	0.219054	0.354167	-1.03799	1	0	1.35354	0.30272	0.625	-0.470004	1.37255	0.31667
203761	32	40	1	1	1	0	21.2306	0	1	0	0	0	0	0	0	0	0	1	0	0	0	0.46	1.38	0.9	0.97	2.49	1.5	13	13	13	16	16	16	0.469388	-0.756326	1.4375	0.362905	0.9	-0.105361	0.979798	-0.0204089	2.51515	0.922333	1.48515	0.395515
256984	34	39	0	1	1	0	20.9321	0	1	0	0	0	0	0	0	0	0	0	0	0	0	0.79	0.99	0.8	1.09	0.68	1.44	12	12	12	17	17	17	0.806122	-0.21552	1.03125	0.0307717	0.8	-0.223144	1.10101	0.096228	0.708333	-0.34484	1.41176	0.34484
257139	27	38	0	1	1	0	21.6041	0	1	0	0	0	0	0	0	0	0	0	0	0	0	1.62	0.44	1.1	0.82	0.51	1.02	14	14	14	16	16	16	1.54286	0.433636	0.473118	-0.74841	1.1	0.0953102	0.828283	-0.188401	0.515152	-0.663294	1.0099	0.0098523
145627	34	39	0	0	1	0	19.5312	0	1	0	0	0	0	0	0	0	0	0	0	0	0	0.9	0.84	1.6	1.07	1.11	1	12	12	12	18	18	18	0.918367	-0.0851578	0.875	-0.133531	1.6	0.470004	1.08081	0.077709	1.18085	0.166235	0.952381	-0.0487902
255728	26	36	0	1	1	0	24.4352	0	0	0	0	1	0	1	0	0	0	1	0	0	0	0.91	0.63	1.7	0.69	0.54	1.11	12	12	12	16	16	16	0.928571	-0.074108	0.65625	-0.421213	1.7	0.530628	0.69697	-0.361013	0.545455	-0.606136	1.09901	0.0944097
257182	27	38	1	1	1	0	19.6506	0	0	0	0	0	0	0	0	0	0	0	0	0	0	1.6	1.41	0.7	1.45	1.04	1.21	11	11	11	16	16	16	1.68421	0.521297	1.43878	0.363792	0.7	-0.356675	1.46465	0.381614	1.05051	0.049271	1.19802	0.18067
257205	25	37	1	1	1	0	20.7008	0	1	0	0	0	0	0	0	0	0	0	0	0	0	0.71	0.72	1.1	1.18	0.89	0.91	12	12	12	16	16	16	0.72449	-0.322288	0.75	-0.287682	1.1	0.0953102	1.19192	0.175565	0.89899	-0.106483	0.90099	-0.104261
257181	26	41	1	1	0	0	20.5761	0	1	0	0	0	0	0	0	0	0	0	0	0	0	1.19	0.46	0.9	0.99	0.46	0.78	14	14	14	18	14	18	1.13333	0.125163	0.494624	-0.703958	0.9	-0.105361	1	0	0.433962	-0.834798	0.742857	-0.297252
257217	34	38	1	1	0	0	19.9481	0	1	0	0	0	0	0	0	0	0	0	0	0	0	0.36	0.49	0.8	0.98	0.96	1.11	12	12	12	17	17	17	0.367347	-1.00145	0.510417	-0.672528	0.8	-0.223144	0.989899	-0.0101524	1	0	1.08824	0.0845574
116452	31	37	1	1	1	0	20.0773	0	1	1	0	0	0	0	0	0	0	0	0	0	0	0.48	0.39	1.2	0.81	0.27	1.06	13	13	13	17	17	17	0.489796	-0.713766	0.40625	-0.900787	1.2	0.182322	0.818182	-0.200671	0.28125	-1.26851	1.03922	0.0384663
138722	30	37	1	1	1	0	17.1675	0	1	0	0	0	0	0	0	0	0	1	0	0	0	0.62	0.34	1.4	1.51	0.81	0.81	12	12	12	17	17	17	0.632653	-0.457833	0.354167	-1.03799	1.4	0.336472	1.52525	0.42216	0.84375	-0.169899	0.794118	-0.230524
298448	31	39	1	0	1	0	19.7266	0	1	1	0	0	0	0	0	1	0	0	0	0	0	1.77	1.36	1	1.19	0.5	1.06	12	12	12	19	19	19	1.80612	0.591182	1.41667	0.348307	1	0	1.20202	0.184004	0.510204	-0.672944	1.01923	0.0190482
174707	29	40	0	1	1	1	21.5139	0	1	1	0	0	0	0	0	0	0	0	0	0	0	0.32	1.94	1.3	0.65	2.18	0.98	13	13	13	17	17	17	0.326531	-1.11923	2.02083	0.70351	1.3	0.262364	0.656566	-0.420733	2.27083	0.820147	0.960784	-0.0400053
298498	29	40	0	1	1	1	16.3304	0	0	0	0	0	0	0	0	0	0	0	0	0	0	1.06	0.37	0.8	1.03	0.59	0.74	12	12	12	16	16	16	1.08163	0.0784716	0.385417	-0.95343	0.8	-0.223144	1.0404	0.0396091	0.59596	-0.517582	0.732673	-0.311055
296567	28	39	1	1	0	1	25.8478	0	0	1	1	0	0	0	0	0	0	1	0	0	0	1.57	1.18	1.3	1.55	0.71	1.29	12	12	12	16	16	16	1.60204	0.471278	1.22917	0.206336	1.3	0.262364	1.56566	0.448305	0.717172	-0.33244	1.27723	0.244692
296576	34	39	0	1	1	1	28.6048	0	0	0	0	0	0	0	0	0	0	0	0	0	0	0.39	0.73	1	0.91	0.67	1.16	12	12	12	16	16	16	0.397959	-0.921406	0.760417	-0.273889	1	0	0.919192	-0.0842603	0.676768	-0.390427	1.14851	0.13847
296577	28	38	1	1	1	1	20.5191	0	0	0	1	0	0	0	0	0	0	1	0	0	0	1.33	1.51	1.4	1.17	0.69	1.17	13	13	13	16	16	16	1.35714	0.305382	1.57292	0.452932	1.4	0.336472	1.18182	0.167054	0.69697	-0.361013	1.15842	0.147053
296581	26	39	0	1	0	1	23.4952	0	0	0	1	0	0	0	0	0	0	0	0	0	0	0.68	0.49	1.3	0.74	0.71	1.03	13	13	13	16	16	16	0.693878	-0.36546	0.510417	-0.672528	1.3	0.262364	0.747475	-0.291055	0.717172	-0.33244	1.0198	0.0196085
257073	32	41	1	1	1	0	20.061	0	1	0	0	0	0	0	0	0	0	0	0	0	0	1.2	2.76	1.1	0.7	2.93	0.76	13	13	13	17	17	17	1.22449	0.202524	2.875	1.05605	1.1	0.0953102	0.707071	-0.346625	3.05208	1.11582	0.745098	-0.294239
256071	29	39	0	1	0	0	21.3593	0	1	0	0	0	0	0	0	0	0	1	0	0	0	0.71	0.57	0.6	0.87	0.72	1.31	12	12	12	17	17	17	0.72449	-0.322288	0.59375	-0.521297	0.6	-0.510826	0.878788	-0.129212	0.75	-0.287682	1.28431	0.250225
256218	26	40	1	1	1	0	19.1953	0	0	0	0	0	0	0	0	0	0	0	0	0	0	1.62	0.94	1.5	0.91	1.37	1.21	13	13	13	17	17	17	1.65306	0.502629	0.979167	-0.0210534	1.5	0.405465	0.919192	-0.0842603	1.42708	0.355633	1.18627	0.170818
256560	26	40	0	1	1	0	19.2277	0	0	0	0	0	0	0	0	0	0	0	0	0	0	1.07	0.74	1	1.08	1.01	1.09	13	13	13	17	17	17	1.09184	0.0878614	0.770833	-0.260283	1	0	1.09091	0.0870114	1.05208	0.0507723	1.06863	0.0663751
243055	30	40	1	1	1	0	20.3856	0	1	0	0	0	0	0	0	0	0	0	0	0	0	0.54	0.43	0.8	0.9	0.72	0.95	13	13	13	17	17	17	0.55102	-0.595983	0.447917	-0.803148	0.8	-0.223144	0.909091	-0.0953102	0.75	-0.287682	0.931373	-0.0710959
256834	26	35	1	1	1	0	22.6003	0	0	0	0	1	0	1	0	0	0	0	0	0	0	0.96	2.4	0.7	1.95	2.66	1.01	14	14	14	18	18	18	0.914286	-0.0896122	2.58065	0.948039	0.7	-0.356675	1.9697	0.67788	2.82979	1.0402	0.961905	-0.0388398
256861	27	39	0	1	1	0	19.1406	0	0	0	0	0	0	0	0	0	0	1	0	0	0	0.63	1.36	1.3	0.85	1.25	1.2	12	12	12	16	16	16	0.642857	-0.441833	1.41667	0.348307	1.3	0.262364	0.858586	-0.152469	1.26263	0.233194	1.18812	0.172371
256881	29	38	1	1	1	0	23.1834	0	0	0	0	0	0	0	0	0	0	2	0	0	0	1.13	2.83	1	0.81	1.91	1.04	13	13	13	18	18	18	1.15306	0.14242	2.94792	1.0811	1	0	0.818182	-0.200671	2.03191	0.708979	0.990476	-0.00956945
256902	26	38	0	1	1	0	20.0288	0	0	0	0	0	0	0	0	0	0	0	0	0	0	1.32	2.1	0.8	0.99	1.57	1.54	13	13	13	17	17	17	1.34694	0.297834	2.1875	0.782759	0.8	-0.223144	1	0	1.63542	0.491898	1.5098	0.41198
257049	28	38	0	1	0	0	18.5901	0	0	0	0	0	0	0	1	0	0	0	0	0	0	2.17	1.58	0.9	1.36	1.8	1.1	12	12	12	16	16	16	2.21429	0.79493	1.64583	0.498247	0.9	-0.105361	1.37374	0.317535	1.81818	0.597837	1.08911	0.0853598
257057	25	40	1	1	0	0	18.6667	0	0	0	0	0	0	0	0	0	0	0	0	0	0	1.57	0.94	1	0.93	0.85	1.39	13	13	13	17	17	17	1.60204	0.471278	0.979167	-0.0210534	1	0	0.939394	-0.0625204	0.885417	-0.121697	1.36275	0.309501
201244	28	39	1	1	1	0	18.9036	0	1	0	0	0	0	0	0	0	0	0	0	0	0	1.21	1.89	1.4	1.29	2.73	1.02	13	13	13	18	18	18	1.23469	0.210823	1.96875	0.677399	1.4	0.336472	1.30303	0.264693	2.90426	1.06618	0.971429	-0.0289875
296616	24	40	0	1	1	1	16.4366	0	0	0	0	0	0	0	0	0	0	1	0	0	0	0.99	0.22	1	1.12	0.26	1.15	13	13	13	17	17	17	1.0102	0.0101524	0.229167	-1.47331	1	0	1.13131	0.123379	0.270833	-1.30625	1.12745	0.119959
294838	32	40	1	1	0	0	21.875	1	1	1	1	0	0	0	0	0	0	1	0	0	0	1.57	0.91	1.3	1.29	0.76	1.26	12	12	12	16	16	16	1.60204	0.471278	0.947917	-0.0534887	1.3	0.262364	1.30303	0.264693	0.767677	-0.264387	1.24752	0.221161
294866	34	40	0	1	0	1	25.8275	0	1	0	0	0	0	0	0	0	0	1	0	0	0	1.08	0.76	0.8	1.29	0.81	0.91	13	13	13	17	17	17	1.10204	0.0971637	0.791667	-0.233615	0.8	-0.223144	1.30303	0.264693	0.84375	-0.169899	0.892157	-0.114113
183971	34	40	1	1	1	1	21.7096	0	1	0	0	0	0	0	0	1	0	1	0	0	0	0.56	0.8	1.3	0.76	0.66	1.3	13	13	13	18	18	18	0.571429	-0.559616	0.833333	-0.182322	1.3	0.262364	0.767677	-0.264387	0.702128	-0.35364	1.2381	0.213574
229625	33	38	1	1	0	0	19.487	0	1	0	0	0	0	0	1	0	0	0	0	0	0	1.33	0.91	1.2	1.35	0.83	0.91	13	13	13	17	17	17	1.35714	0.305382	0.947917	-0.0534887	1.2	0.182322	1.36364	0.310155	0.864583	-0.145508	0.892157	-0.114113
256368	33	39	1	1	1	0	22.5896	0	1	0	0	0	0	0	0	0	0	1	0	0	0	0.71	0.59	1	1.8	0.56	1.54	12	12	12	16	16	16	0.72449	-0.322288	0.614583	-0.486811	1	0	1.81818	0.597837	0.565657	-0.569768	1.52475	0.421832
256887	31	38	1	1	1	0	20.5126	0	0	0	0	0	0	0	0	0	0	0	0	0	0	1.3	0.76	0.7	0.59	1.41	0.85	12	12	12	16	16	16	1.32653	0.282567	0.791667	-0.233615	0.7	-0.356675	0.59596	-0.517582	1.42424	0.35364	0.841584	-0.172469
256903	33	39	1	1	1	0	21.6311	0	1	0	0	0	0	0	0	0	0	2	0	0	0	0.77	2	1.2	0.84	1.46	1.28	13	13	13	17	17	17	0.785714	-0.241162	2.08333	0.733969	1.2	0.182322	0.848485	-0.164303	1.52083	0.419258	1.2549	0.227057
298166	25	40	1	1	1	1	19.5046	0	0	0	0	0	0	0	0	0	0	0	0	0	0	0.42	0.83	0.8	0.85	0.74	0.93	12	12	12	16	16	16	0.428571	-0.847298	0.864583	-0.145508	0.8	-0.223144	0.858586	-0.152469	0.747475	-0.291055	0.920792	-0.082521
296698	30	39	0	1	1	1	26.4463	0	1	1	0	0	0	0	0	0	0	1	0	0	0	0.89	0.54	1.1	0.95	0.73	0.87	12	12	12	16	16	16	0.908163	-0.0963311	0.5625	-0.575364	1.1	0.0953102	0.959596	-0.041243	0.737374	-0.30466	0.861386	-0.149212
296199	28	37	1	1	0	1	19.9219	0	1	1	1	0	0	0	0	0	0	0	0	0	0	0.88	0.7	1.5	1.02	0.89	0.75	13	13	13	17	17	17	0.897959	-0.107631	0.729167	-0.315853	1.5	0.405465	1.0303	0.029853	0.927083	-0.0757118	0.735294	-0.307485
296812	23	40	1	1	0	1	18.3655	0	1	1	1	0	0	0	0	0	0	1	0	0	0	0.39	0.39	1.1	0.91	0.44	1.2	12	12	12	17	17	17	0.397959	-0.921406	0.40625	-0.900787	1.1	0.0953102	0.919192	-0.0842603	0.458333	-0.780159	1.17647	0.162519
296322	28	40	0	1	1	1	20.061	0	0	0	0	0	0	0	0	0	0	0	0	0	0	0.79	1.12	0.8	0.92	1.67	0.91	13	13	13	16	16	16	0.806122	-0.21552	1.16667	0.154151	0.8	-0.223144	0.929293	-0.0733313	1.68687	0.522874	0.90099	-0.104261
295864	32	38	1	1	1	1	24.8445	0	1	1	0	0	0	0	0	0	0	0	0	0	0	2.2	2.03	1	0.59	1.05	1.12	12	12	12	17	17	17	2.2449	0.80866	2.11458	0.748858	1	0	0.59596	-0.517582	1.09375	0.0896122	1.09804	0.0935261
229838	32	40	0	1	1	1	18.1312	0	1	0	0	0	0	0	0	0	0	0	0	0	0	0.66	0.43	1.2	0.88	0.59	0.8	13	13	13	17	17	17	0.673469	-0.395313	0.447917	-0.803148	1.2	0.182322	0.888889	-0.117783	0.614583	-0.486811	0.784314	-0.242946
295963	29	39	0	1	1	1	19.3337	0	1	0	0	0	0	0	0	0	0	1	0	0	0	1.22	1.54	1.2	1.37	1.24	1.13	13	13	13	17	17	17	1.2449	0.219054	1.60417	0.472604	1.2	0.182322	1.38384	0.324861	1.29167	0.255933	1.10784	0.102415
295973	29	39	0	1	1	1	23.4375	0	0	0	0	0	0	0	0	0	0	0	0	0	0	0.87	1	0.8	1.15	0.65	1.41	13	13	13	18	18	18	0.887755	-0.119059	1.04167	0.040822	0.8	-0.223144	1.16162	0.149812	0.691489	-0.368908	1.34286	0.2948
204030	34	37	1	1	1	1	21.4844	0	1	1	1	0	0	0	0	1	0	1	0	0	0	0.69	0.41	0.8	0.62	0.28	0.76	12	12	12	16	16	16	0.704082	-0.350861	0.427083	-0.850776	0.8	-0.223144	0.626263	-0.467985	0.282828	-1.26292	0.752475	-0.284387
297903	31	37	1	1	1	0	23.1247	0	1	0	0	0	0	0	0	0	0	0	0	0	0	1.44	1.28	0.9	1.88	3.03	0.81	12	12	12	16	16	16	1.46939	0.384846	1.33333	0.287682	0.9	-0.105361	1.89899	0.641322	3.06061	1.11861	0.80198	-0.220671
188793	31	39	1	1	1	1	19.3337	0	0	0	0	0	0	0	0	0	0	0	0	0	0	0.98	0.93	1.1	1.43	1.11	1.08	12	12	12	16	16	16	1	0	0.96875	-0.0317487	1.1	0.0953102	1.44444	0.367725	1.12121	0.11441	1.06931	0.0670107
297939	27	39	0	1	0	1	22.4609	0	0	0	0	0	0	0	0	0	0	1	0	0	0	0.36	0.6	1.1	0.82	0.62	1.33	12	12	12	16	16	16	0.367347	-1.00145	0.625	-0.470004	1.1	0.0953102	0.828283	-0.188401	0.626263	-0.467985	1.31683	0.275229
202639	32	40	1	1	1	0	21.6713	0	1	0	0	0	0	0	0	0	0	1	0	0	0	0.52	0.96	1.3	1.05	1.12	1.18	13	13	13	17	17	17	0.530612	-0.633724	1	0	1.3	0.262364	1.06061	0.0588405	1.16667	0.154151	1.15686	0.145712
257183	26	41	1	1	0	0	19.9219	0	0	0	0	0	0	0	0	0	0	0	0	0	0	0.4	0.75	1.1	0.88	0.85	0.67	13	13	13	17	17	17	0.408163	-0.896088	0.78125	-0.24686	1.1	0.0953102	0.888889	-0.117783	0.885417	-0.121697	0.656863	-0.42028
216688	30	38	1	1	0	0	24.8358	0	1	0	0	0	0	0	0	0	0	1	0	0	0	1.21	0.99	1	0.82	0.91	0.9	13	13	13	16	16	16	1.23469	0.210823	1.03125	0.0307717	1	0	0.828283	-0.188401	0.919192	-0.0842603	0.891089	-0.115311
256603	30	39	1	1	0	0	21.2306	0	0	0	0	0	0	0	1	0	0	1	0	0	0	1.4	1.16	1.6	1.02	0.77	1.41	12	12	12	16	16	16	1.42857	0.356675	1.20833	0.189242	1.6	0.470004	1.0303	0.029853	0.777778	-0.251314	1.39604	0.333639
256745	42	39	0	1	1	0	20.83	0	1	0	0	0	0	0	0	0	0	1	0	0	0	0.64	0.67	0.9	1.41	0.99	0.82	13	13	13	16	16	16	0.653061	-0.426084	0.697917	-0.359656	0.9	-0.105361	1.42424	0.35364	1	0	0.811881	-0.208401
124408	33	40	0	1	1	0	21.2279	0	1	0	0	0	0	0	0	0	0	1	0	0	0	1.86	0.96	0.9	1.44	0.91	1.14	13	13	13	18	18	18	1.89796	0.640779	1	0	0.9	-0.105361	1.45455	0.374693	0.968085	-0.0324353	1.08571	0.0822381
246117	23	39	1	1	0	0	21.0828	0	1	0	0	0	0	0	0	1	0	0	0	0	0	0.75	0.71	1	1.05	0.79	1.2	13	13	13	17	17	17	0.765306	-0.267479	0.739583	-0.301668	1	0	1.06061	0.0588405	0.822917	-0.1949	1.17647	0.162519
296326	27	38	0	1	1	1	22.8545	0	0	0	0	0	0	0	0	0	0	0	0	0	0	0.98	0.61	0.8	0.72	0.63	1.33	13	13	13	16	16	16	1	0	0.635417	-0.453474	0.8	-0.223144	0.727273	-0.318454	0.636364	-0.451985	1.31683	0.275229
296329	36	36	1	1	1	1	18.5178	0	1	0	0	1	0	1	0	0	0	0	0	0	0	2.98	1.75	1.1	1.3	4	1.22	12	12	12	16	16	16	3.04082	1.11213	1.82292	0.600438	1.1	0.0953102	1.31313	0.272415	4.0404	1.39634	1.20792	0.188901
296369	35	39	0	1	1	1	20.8117	0	1	0	0	0	0	0	0	0	0	1	0	0	0	0.55	1.66	0.8	1.56	2.4	0.85	12	12	12	16	16	16	0.561224	-0.577634	1.72917	0.54764	0.8	-0.223144	1.57576	0.454736	2.42424	0.885519	0.841584	-0.172469
296379	27	40	1	1	1	1	21.0077	0	0	0	0	0	0	0	0	0	0	0	0	0	0	0.32	1.14	1	1.14	0.95	1.03	13	13	13	16	16	16	0.326531	-1.11923	1.1875	0.17185	1	0	1.15152	0.141079	0.959596	-0.041243	1.0198	0.0196085
298716	32	39	1	0	1	1	19.8667	0	0	0	0	0	0	0	0	0	0	1	0	1	0	0.62	1.08	0.9	1.42	1.35	0.84	12	12	12	16	16	16	0.632653	-0.457833	1.125	0.117783	0.9	-0.105361	1.43434	0.360707	1.36364	0.310155	0.831683	-0.184304
297944	24	38	0	1	1	0	18.5491	0	0	0	0	0	0	0	0	0	0	0	0	0	0	1.28	1.08	1	0.88	1.43	1.17	13	13	13	17	17	17	1.30612	0.267063	1.125	0.117783	1	0	0.888889	-0.117783	1.48958	0.398496	1.14706	0.137201
127863	36	38	0	1	1	1	20.83	0	1	0	0	0	0	0	0	0	0	0	0	0	0	0.55	1.59	0.8	0.93	1.53	1.06	12	12	12	17	17	17	0.561224	-0.577634	1.65625	0.504556	0.8	-0.223144	0.939394	-0.0625204	1.59375	0.46609	1.03922	0.0384663
297972	34	39	1	1	1	1	24.0346	0	0	0	0	0	0	0	0	0	0	0	0	0	0	1.47	1.36	0.9	0.69	2.23	1.26	13	13	13	17	17	17	1.5	0.405465	1.41667	0.348307	0.9	-0.105361	0.69697	-0.361013	2.32292	0.842824	1.23529	0.211309
300824	30	39	0	1	1	1	18.369	0	0	0	0	0	0	0	0	0	0	0	0	0	0	0.69	0.73	0.9	0.68	1.16	0.77	12	12	12	16	16	16	0.704082	-0.350861	0.760417	-0.273889	0.9	-0.105361	0.686869	-0.375612	1.17172	0.15847	0.762376	-0.271315
300836	23	38	0	1	1	1	25.3679	0	0	0	0	0	0	0	0	0	0	0	0	0	0	0.77	0.67	1.2	0.79	0.64	0.76	13	13	13	18	18	18	0.785714	-0.241162	0.697917	-0.359656	1.2	0.182322	0.79798	-0.225672	0.680851	-0.384412	0.72381	-0.323227
300926	25	38	1	1	1	1	18.75	0	0	0	0	0	0	0	0	0	0	0	0	1	0	0.52	0.46	0.7	0.53	0.52	1.25	13	13	13	17	17	17	0.530612	-0.633724	0.479167	-0.735707	0.7	-0.356675	0.535354	-0.624828	0.541667	-0.613104	1.22549	0.203341
300945	33	40	1	1	1	1	16.9625	0	0	0	0	0	0	0	0	0	0	0	0	0	0	1.31	1.35	0.8	0.69	2.19	1.06	12	12	12	16	16	16	1.33673	0.29023	1.40625	0.340927	0.8	-0.223144	0.69697	-0.361013	2.21212	0.793952	1.0495	0.0483186
256551	24	39	0	1	1	0	18.8271	0	0	0	0	0	0	0	0	0	0	0	0	0	0	1.06	1.37	0.8	0.87	1.57	1.22	13	13	13	17	17	17	1.08163	0.0784716	1.42708	0.355633	0.8	-0.223144	0.878788	-0.129212	1.63542	0.491898	1.19608	0.179048
80500	32	38	0	1	0	0	19.8413	0	1	0	0	0	0	0	0	0	0	1	0	0	0	0.74	1.99	0.9	0.78	1.88	0.7	12	12	12	17	17	17	0.755102	-0.280902	2.07292	0.728957	0.9	-0.105361	0.787879	-0.238411	1.95833	0.672094	0.686275	-0.376478
256753	25	39	1	1	1	0	19.2277	0	0	0	0	0	0	0	0	0	0	0	0	0	0	0.72	0.43	1.2	1.28	0.39	0.67	13	13	13	17	17	17	0.734694	-0.308301	0.447917	-0.803148	1.2	0.182322	1.29293	0.25691	0.40625	-0.900787	0.656863	-0.42028
256763	22	37	1	1	0	0	23.0469	0	0	0	0	0	0	0	0	0	0	0	0	0	0	0.45	0.73	1	0.76	0.81	1.18	11	11	11	16	16	16	0.473684	-0.747214	0.744898	-0.294508	1	0	0.767677	-0.264387	0.818182	-0.200671	1.16832	0.155564
256784	30	38	1	1	1	0	19.8141	0	1	0	0	0	0	0	0	0	0	0	0	0	0	1	0.35	1.1	0.95	0.43	1.43	12	12	12	16	16	16	1.02041	0.0202027	0.364583	-1.009	1.1	0.0953102	0.959596	-0.041243	0.434343	-0.83392	1.41584	0.347724
298772	30	39	1	1	1	1	22.9398	0	1	0	0	0	0	0	0	1	0	0	0	0	0	1.06	0.53	1.1	1.33	0.34	1.12	12	12	12	17	17	17	1.08163	0.0784716	0.552083	-0.594056	1.1	0.0953102	1.34343	0.295229	0.354167	-1.03799	1.09804	0.0935261
298823	28	38	1	1	0	1	16.6493	0	0	0	0	0	0	0	0	0	0	0	0	0	0	0.35	1.29	0.7	1.29	1.02	1.4	12	12	12	16	16	16	0.357143	-1.02962	1.34375	0.295464	0.7	-0.356675	1.30303	0.264693	1.0303	0.029853	1.38614	0.326522
301168	26	39	0	1	0	1	18.75	0	0	1	1	0	0	0	0	0	0	1	0	0	0	0.67	0.58	1.4	1.04	0.62	0.92	12	12	12	16	16	16	0.683673	-0.380275	0.604167	-0.503905	1.4	0.336472	1.05051	0.049271	0.626263	-0.467985	0.910891	-0.0933319
301188	23	41	1	1	0	1	23.4375	0	1	0	1	0	0	0	0	0	0	0	0	0	0	1.26	1.13	1.1	1.17	0.75	1.14	13	13	13	17	17	17	1.28571	0.251314	1.17708	0.16304	1.1	0.0953102	1.18182	0.167054	0.78125	-0.24686	1.11765	0.111226
301201	34	40	1	1	1	1	19.9481	0	1	1	0	0	0	0	0	0	0	0	0	0	0	0.82	3.77	1.2	1.02	2.52	0.98	12	12	12	16	16	16	0.836735	-0.178248	3.92708	1.3679	1.2	0.182322	1.0303	0.029853	2.54545	0.934309	0.970297	-0.030153
296364	30	40	1	1	1	0	17.5431	0	0	0	0	0	0	0	0	0	0	0	0	1	0	1.94	0.64	1.2	1.48	0.67	1.57	12	12	12	17	17	17	1.97959	0.682891	0.666667	-0.405465	1.2	0.182322	1.49495	0.402092	0.697917	-0.359656	1.53922	0.431273
296658	31	37	0	1	1	1	22.0386	0	0	0	0	0	0	0	0	0	0	0	0	0	0	0.41	0.98	1.1	0.57	0.7	0.76	11	11	11	16	16	16	0.431579	-0.840305	1	0	1.1	0.0953102	0.575758	-0.552069	0.707071	-0.346625	0.752475	-0.284387
223727	26	40	1	1	0	0	27.3438	0	1	1	1	0	0	0	0	0	0	0	0	0	0	0.67	0.67	1.5	1.14	0.57	1.1	12	12	12	17	17	17	0.683673	-0.380275	0.697917	-0.359656	1.5	0.405465	1.15152	0.141079	0.59375	-0.521297	1.07843	0.0755076
296194	31	40	0	1	1	1	17.5146	0	0	0	0	0	0	0	0	0	0	0	0	0	0	2.55	0.55	1.2	1.4	0.64	1.41	12	12	12	16	16	16	2.60204	0.956296	0.572917	-0.557015	1.2	0.182322	1.41414	0.346523	0.646465	-0.436237	1.39604	0.333639
173466	28	37	0	1	1	1	18.1661	0	1	0	1	0	0	0	0	1	0	0	0	0	0	1.1	1.55	1.2	1.01	1.62	1.01	12	12	12	16	16	16	1.12245	0.115513	1.61458	0.479077	1.2	0.182322	1.0202	0.0200007	1.63636	0.492476	1	0
256711	32	40	0	1	1	0	21.2306	0	0	0	0	0	0	0	0	0	0	1	0	0	0	1.12	1.04	0.8	1.82	1.46	1.2	11	11	11	16	16	16	1.17895	0.164622	1.06122	0.0594234	0.8	-0.223144	1.83838	0.608887	1.47475	0.388487	1.18812	0.172371
256913	28	40	0	1	0	0	22.9421	0	0	0	0	0	0	0	0	0	0	1	0	0	0	0.72	0.59	1.1	0.94	0.48	0.96	12	12	12	16	16	16	0.734694	-0.308301	0.614583	-0.486811	1.1	0.0953102	0.949495	-0.0518251	0.484848	-0.723919	0.950495	-0.0507723
256383	25	38	0	1	0	0	20.83	0	0	0	0	0	0	0	0	0	0	1	0	0	0	0.72	1.78	0.8	0.56	2.01	0.97	12	12	12	18	18	18	0.734694	-0.308301	1.85417	0.617435	0.8	-0.223144	0.565657	-0.569768	2.1383	0.76001	0.92381	-0.0792494
256284	31	39	0	1	1	0	19.5717	0	0	0	0	0	0	0	0	0	0	0	0	0	0	2.04	1.39	0.9	0.91	1.54	1.27	13	13	13	17	17	17	2.08163	0.733153	1.44792	0.370126	0.9	-0.105361	0.919192	-0.0842603	1.60417	0.472604	1.2451	0.219214
256213	26	41	1	1	0	0	19.8791	0	0	0	0	0	0	0	0	0	0	0	0	0	0	1.2	0.81	1.1	0.96	0.5	0.7	13	13	13	17	17	17	1.22449	0.202524	0.84375	-0.169899	1.1	0.0953102	0.969697	-0.0307717	0.520833	-0.652325	0.686275	-0.376478
256499	32	39	0	1	0	0	20.3125	0	1	0	0	0	0	0	0	0	0	0	0	0	0	1.21	1.92	0.7	1.22	1.5	1.51	12	12	12	17	17	17	1.23469	0.210823	2	0.693147	0.7	-0.356675	1.23232	0.208901	1.5625	0.446287	1.48039	0.392307
298842	26	40	1	1	0	1	21.3675	0	0	0	0	0	0	0	0	0	0	0	0	0	0	0.54	0.81	1.1	0.71	0.77	1.15	14	14	14	16	16	16	0.514286	-0.664976	0.870968	-0.13815	1.1	0.0953102	0.717172	-0.33244	0.777778	-0.251314	1.13861	0.129812
298847	18	38	0	1	0	0	18.1077	0	0	0	0	0	0	0	0	0	0	0	0	0	0	0.91	1.24	1.2	0.69	0.98	1.21	13	13	13	17	17	17	0.928571	-0.074108	1.29167	0.255933	1.2	0.182322	0.69697	-0.361013	1.02083	0.0206193	1.18627	0.170818
298874	25	40	0	1	1	0	21.0279	0	0	0	0	0	0	0	0	0	0	1	0	0	0	0.47	1.22	0.8	1.32	1.81	0.94	12	12	12	17	17	17	0.479592	-0.73482	1.27083	0.239673	0.8	-0.223144	1.33333	0.287682	1.88542	0.634149	0.921569	-0.081678
298894	34	40	0	1	1	1	26.5021	0	1	1	0	0	0	0	0	0	0	0	0	0	0	0.55	0.77	0.9	0.73	0.8	1.46	12	12	12	16	16	16	0.561224	-0.577634	0.802083	-0.220543	0.9	-0.105361	0.737374	-0.30466	0.808081	-0.213093	1.44554	0.368486
124180	34	39	1	1	1	1	19.6506	0	1	0	0	0	0	0	0	1	0	0	0	0	0	1.65	1.73	0.8	0.96	2.41	1.14	13	13	13	16	16	16	1.68367	0.520978	1.80208	0.588943	0.8	-0.223144	0.969697	-0.0307717	2.43434	0.889677	1.12871	0.121078
296765	33	38	0	1	1	1	22.0711	0	1	0	0	0	0	0	0	1	0	1	0	0	0	2.02	2.54	1	0.57	1.86	0.89	13	13	13	17	17	17	2.06122	0.7233	2.64583	0.972986	1	0	0.575758	-0.552069	1.9375	0.661398	0.872549	-0.136336
205319	32	40	1	1	0	0	22.3133	0	1	0	0	0	0	0	0	0	0	0	0	0	0	0.79	1.59	1	1.13	1.52	0.72	14	14	14	17	17	17	0.752381	-0.284512	1.70968	0.536305	1	0	1.14141	0.132268	1.58333	0.459532	0.705882	-0.348307
296223	25	39	0	1	1	1	19.4734	0	0	1	1	0	0	0	0	0	0	0	0	0	0	0.99	1.51	0.8	0.94	1.19	1.2	12	12	12	17	17	17	1.0102	0.0101524	1.57292	0.452932	0.8	-0.223144	0.949495	-0.0518251	1.23958	0.214775	1.17647	0.162519
296299	28	41	1	1	0	1	21.5019	0	0	0	0	0	0	0	0	0	0	0	0	0	0	1.48	0.69	1.5	1.14	0.84	0.77	12	12	12	17	17	17	1.5102	0.412245	0.71875	-0.330242	1.5	0.405465	1.15152	0.141079	0.875	-0.133531	0.754902	-0.281167
296307	33	39	1	1	1	1	22.0741	0	1	0	0	0	0	0	0	1	0	0	0	0	0	0.22	1.14	0.7	2.2	1.26	1.03	12	12	12	17	17	17	0.22449	-1.49393	1.1875	0.17185	0.7	-0.356675	2.22222	0.798508	1.3125	0.271934	1.0098	0.00975617
140137	30	38	1	1	1	0	20.4294	0	1	0	0	0	0	0	0	0	0	0	0	0	0	0.48	1.1	1.2	0.66	1.29	1.12	11	11	11	15	15	15	0.505263	-0.682676	1.12245	0.115513	1.2	0.182322	0.66	-0.415515	1.24038	0.215422	1.14286	0.133531
300982	24	38	1	1	1	1	21.2489	0	0	0	0	0	0	0	0	0	0	1	0	0	0	0.45	0.19	0.9	1.37	0.4	1.13	12	12	12	16	16	16	0.459184	-0.778305	0.197917	-1.61991	0.9	-0.105361	1.38384	0.324861	0.40404	-0.90624	1.11881	0.112267
277621	38	39	0	1	1	1	21.6311	0	1	0	0	0	0	0	0	1	0	1	0	0	0	0.82	2.1	1.1	0.45	1.29	1.11	12	12	12	16	16	16	0.836735	-0.178248	2.1875	0.782759	1.1	0.0953102	0.454545	-0.788457	1.30303	0.264693	1.09901	0.0944097
301025	25	38	0	1	0	1	17.5951	0	0	0	0	0	0	0	0	0	0	0	0	0	0	1.09	1.09	0.7	0.86	1.23	1.05	13	13	13	16	16	16	1.11224	0.10638	1.13542	0.127	0.7	-0.356675	0.868687	-0.140773	1.24242	0.217065	1.0396	0.0388398
256566	29	40	1	1	1	0	22.0386	0	0	0	0	0	0	0	0	0	0	1	0	0	0	0.51	1.11	1.4	0.84	1.3	1.09	14	14	14	17	17	17	0.485714	-0.722135	1.19355	0.176931	1.4	0.336472	0.848485	-0.164303	1.35417	0.303186	1.06863	0.0663751
257210	25	40	0	1	1	0	21.83	0	0	0	0	0	0	0	0	0	0	0	0	0	0	1.26	1.55	0.8	0.75	1.24	1.04	14	14	14	18	18	18	1.2	0.182322	1.66667	0.510826	0.8	-0.223144	0.757576	-0.277632	1.31915	0.276987	0.990476	-0.00956945
257270	28	40	0	1	1	0	20.475	0	0	0	0	0	0	0	0	0	0	1	0	0	0	1.86	0.5	0.8	1.37	0.65	0.96	12	12	12	16	16	16	1.89796	0.640779	0.520833	-0.652325	0.8	-0.223144	1.38384	0.324861	0.656566	-0.420733	0.950495	-0.0507723
257369	26	39	0	0	1	0	18.8271	0	0	0	0	0	0	0	0	0	0	0	0	0	0	0.95	0.39	1	1.13	0.55	1.76	13	13	13	17	17	17	0.969388	-0.0310906	0.40625	-0.900787	1	0	1.14141	0.132268	0.572917	-0.557015	1.72549	0.545511
257495	30	40	0	1	0	0	22.8329	0	0	0	0	0	0	0	0	0	0	1	0	0	0	0.32	0.47	0.9	0.73	0.57	1.03	12	12	12	17	17	17	0.326531	-1.11923	0.489583	-0.714201	0.9	-0.105361	0.737374	-0.30466	0.59375	-0.521297	1.0098	0.00975617
147235	33	40	1	1	1	0	21.3039	0	1	0	0	0	0	0	0	0	0	1	0	0	0	0.96	0.72	1.2	0.95	0.81	1.17	12	12	12	17	17	17	0.979592	-0.0206193	0.75	-0.287682	1.2	0.182322	0.959596	-0.041243	0.84375	-0.169899	1.14706	0.137201
256604	29	40	0	1	0	0	20.9566	0	1	0	0	0	0	0	0	0	0	0	0	0	0	0.43	1.62	0.7	0.58	1.17	1.04	12	12	12	16	16	16	0.438776	-0.823767	1.6875	0.523248	0.7	-0.356675	0.585859	-0.534677	1.18182	0.167054	1.0297	0.0292704
296875	26	41	0	1	1	1	20.9643	0	0	0	0	0	0	0	0	0	0	0	0	0	0	0.47	1.18	0.6	1	1.73	0.98	12	12	12	17	17	17	0.479592	-0.73482	1.22917	0.206336	0.6	-0.510826	1.0101	0.0100503	1.80208	0.588943	0.960784	-0.0400053
296884	31	39	1	1	1	1	18.902	0	0	1	1	0	0	0	0	0	0	1	0	0	0	0.56	0.44	1	0.84	0.62	1.35	12	12	12	16	16	16	0.571429	-0.559616	0.458333	-0.780159	1	0	0.848485	-0.164303	0.626263	-0.467985	1.33663	0.290154
295037	27	37	0	1	0	1	19.5312	0	1	0	1	0	0	0	0	0	0	0	0	0	0	0.28	0.82	1.1	0.62	0.7	0.86	13	13	13	17	17	17	0.285714	-1.25276	0.854167	-0.157629	1.1	0.0953102	0.626263	-0.467985	0.729167	-0.315853	0.843137	-0.170626
295105	27	39	1	1	1	1	22.0001	0	0	1	0	0	0	0	0	0	0	1	0	0	0	0.89	0.81	1.7	1.25	1.2	1.32	13	13	13	18	18	18	0.908163	-0.0963311	0.84375	-0.169899	1.7	0.530628	1.26263	0.233194	1.2766	0.244197	1.25714	0.228842
295109	29	40	0	1	1	1	18.026	0	0	0	0	0	0	0	0	0	0	0	0	0	0	0.54	0.7	0.9	0.76	0.94	1.15	12	12	12	16	16	16	0.55102	-0.595983	0.729167	-0.315853	0.9	-0.105361	0.767677	-0.264387	0.949495	-0.0518251	1.13861	0.129812
294759	28	38	1	1	1	1	19.3337	0	1	0	0	0	0	0	0	0	0	0	0	0	0	1.06	0.54	0.9	1.04	0.58	1.23	12	12	12	16	16	16	1.08163	0.0784716	0.5625	-0.575364	0.9	-0.105361	1.05051	0.049271	0.585859	-0.534677	1.21782	0.197064
295148	24	39	1	1	1	1	21.6193	0	0	0	0	0	0	0	0	0	0	1	0	0	0	0.99	2.21	1.2	0.72	2.82	1.09	12	12	12	16	16	16	1.0102	0.0101524	2.30208	0.833815	1.2	0.182322	0.727273	-0.318454	2.84848	1.04679	1.07921	0.0762274
127397	36	39	1	1	1	1	20.0288	0	1	1	1	0	0	0	0	1	0	0	0	0	0	1.07	0.59	1.5	1.06	0.34	0.95	12	12	12	16	16	16	1.09184	0.0878614	0.614583	-0.486811	1.5	0.405465	1.07071	0.0683192	0.343434	-1.06876	0.940594	-0.0612436
248004	35	39	1	1	1	1	19.6506	0	1	1	1	0	0	0	0	0	0	0	0	0	0	0.47	0.87	0.9	0.65	1.12	1.04	12	12	12	17	17	17	0.479592	-0.73482	0.90625	-0.0984401	0.9	-0.105361	0.656566	-0.420733	1.16667	0.154151	1.01961	0.0194181
144422	32	40	0	1	1	1	21.6811	0	1	1	0	0	0	0	0	1	0	0	0	0	0	2.88	0.94	0.9	1.27	0.76	0.79	12	12	12	17	17	17	2.93878	1.07799	0.979167	-0.0210534	0.9	-0.105361	1.28283	0.249067	0.791667	-0.233615	0.77451	-0.255525
298595	22	37	0	1	0	0	19.7777	0	0	0	1	0	0	0	0	0	0	1	0	0	0	0.87	0.38	0.8	0.94	0.6	1.86	12	12	12	17	17	17	0.887755	-0.119059	0.395833	-0.926762	0.8	-0.223144	0.949495	-0.0518251	0.625	-0.470004	1.82353	0.600774
298598	28	36	0	1	0	0	18.7305	0	1	0	0	1	0	1	0	0	0	0	0	0	0	1.39	1.4	1.3	0.93	1.48	1.16	13	13	13	17	17	17	1.41837	0.349506	1.45833	0.377294	1.3	0.262364	0.939394	-0.0625204	1.54167	0.432864	1.13725	0.128617
298320	31	39	1	1	0	1	23.0332	0	1	0	0	0	0	0	0	0	0	0	0	0	0	0.8	1.34	0.9	1.25	0.5	1.18	12	12	12	19	19	19	0.816327	-0.202941	1.39583	0.333492	0.9	-0.105361	1.26263	0.233194	0.510204	-0.672944	1.13462	0.126294
284785	25	40	1	1	1	1	21.0938	0	0	0	0	0	0	0	0	0	0	0	0	0	0	0.96	1.11	1.3	1.22	2.04	1.13	12	12	12	16	16	16	0.979592	-0.0206193	1.15625	0.145182	1.3	0.262364	1.23232	0.208901	2.06061	0.723	1.11881	0.112267
301035	24	39	1	1	0	0	19.7531	0	0	0	0	0	0	0	0	0	0	0	0	0	0	0.45	0.59	1.1	0.82	0.72	0.86	13	13	13	16	16	16	0.459184	-0.778305	0.614583	-0.486811	1.1	0.0953102	0.828283	-0.188401	0.727273	-0.318454	0.851485	-0.160773
177762	28	40	1	1	1	1	20.9366	0	1	0	1	0	0	0	0	0	0	0	0	0	0	0.26	0.62	0.7	0.69	0.89	1.04	13	13	13	18	18	18	0.265306	-1.32687	0.645833	-0.437214	0.7	-0.356675	0.69697	-0.361013	0.946809	-0.0546584	0.990476	-0.00956945
256653	28	35	1	1	0	0	19.5717	0	1	0	0	1	0	1	0	0	0	0	0	0	0	0.56	1.58	0.9	1.15	1.71	0.89	13	13	13	16	16	16	0.571429	-0.559616	1.64583	0.498247	0.9	-0.105361	1.16162	0.149812	1.72727	0.546544	0.881188	-0.126484
255847	34	39	1	1	1	0	23.4852	0	0	0	0	0	0	0	0	0	0	1	0	0	0	0.77	0.44	1.3	1.03	0.51	1.09	13	13	13	17	17	17	0.785714	-0.241162	0.458333	-0.780159	1.3	0.262364	1.0404	0.0396091	0.53125	-0.632523	1.06863	0.0663751
256747	30	40	0	1	1	0	21.2585	0	0	0	0	0	0	0	0	0	0	0	0	0	0	1.83	0.7	0.9	1.32	0.91	1.28	14	14	14	17	17	17	1.74286	0.555526	0.752688	-0.284104	0.9	-0.105361	1.33333	0.287682	0.947917	-0.0534887	1.2549	0.227057
256527	26	37	0	1	1	0	23.0112	0	0	0	0	0	0	0	0	0	0	0	0	0	0	0.92	0.8	0.8	1.22	0.84	1.18	12	12	12	17	17	17	0.938776	-0.0631789	0.833333	-0.182322	0.8	-0.223144	1.23232	0.208901	0.875	-0.133531	1.15686	0.145712
256575	28	39	0	1	0	0	21.3382	0	0	0	0	0	0	0	0	0	0	0	0	0	0	1.13	0.98	1	1.81	1	1.18	13	13	13	17	17	17	1.15306	0.14242	1.02083	0.0206193	1	0	1.82828	0.603377	1.04167	0.040822	1.15686	0.145712
256773	33	41	0	1	1	0	19.5312	0	1	0	0	0	0	0	0	0	0	0	0	0	0	1.7	1.49	0.9	0.57	1.22	1.08	12	12	12	16	16	16	1.73469	0.550831	1.55208	0.439598	0.9	-0.105361	0.575758	-0.552069	1.23232	0.208901	1.06931	0.0670107
264829	28	40	0	1	0	1	23.1405	0	1	0	0	0	0	0	0	0	0	0	0	0	0	0.81	1.25	0.7	0.93	1.15	1.32	13	13	13	18	18	18	0.826531	-0.190518	1.30208	0.263966	0.7	-0.356675	0.939394	-0.0625204	1.2234	0.201637	1.25714	0.228842
292493	30	39	0	1	1	1	22.8928	0	0	0	0	0	0	0	0	0	0	1	0	0	0	1.96	0.62	1	1.15	0.46	1.59	12	12	12	16	16	16	2	0.693147	0.645833	-0.437214	1	0	1.16162	0.149812	0.464646	-0.766478	1.57426	0.453784
296134	30	37	1	1	1	1	18.7962	0	1	0	0	0	0	0	0	0	0	1	0	0	0	0.71	1.12	1.3	0.97	1.61	1.02	13	13	13	17	17	17	0.72449	-0.322288	1.16667	0.154151	1.3	0.262364	0.979798	-0.0204089	1.67708	0.517056	1	0
296146	25	38	0	1	1	1	21.0198	0	0	0	0	0	0	0	0	0	0	0	0	0	0	0.33	0.68	0.8	1.01	0.41	1.05	12	12	12	16	16	16	0.336735	-1.08846	0.708333	-0.34484	0.8	-0.223144	1.0202	0.0200007	0.414141	-0.881548	1.0396	0.0388398
295185	28	39	1	1	1	1	22.0317	0	1	0	1	0	0	0	0	0	0	1	0	0	0	0.69	0.67	1	1.61	1.08	0.96	12	12	12	17	17	17	0.704082	-0.350861	0.697917	-0.359656	1	0	1.62626	0.486285	1.125	0.117783	0.941176	-0.0606246
295217	30	38	1	1	1	0	17.6254	0	0	1	0	0	0	0	0	0	0	0	0	0	0	0.47	0.43	1.1	0.68	0.45	0.79	13	13	13	16	16	16	0.479592	-0.73482	0.447917	-0.803148	1.1	0.0953102	0.686869	-0.375612	0.454545	-0.788457	0.782178	-0.245673
254293	31	41	0	0	1	0	19.0965	0	0	0	0	0	0	0	0	0	0	0	0	0	0	1.69	0.84	0.8	1.44	1.01	1.25	13	13	13	17	17	17	1.72449	0.544931	0.875	-0.133531	0.8	-0.223144	1.45455	0.374693	1.05208	0.0507723	1.22549	0.203341
301085	31	35	1	1	0	1	15.6147	0	0	0	0	1	0	1	0	0	0	0	0	0	0	0.63	0.83	0.9	1.23	0.81	0.85	13	13	13	17	17	17	0.642857	-0.441833	0.864583	-0.145508	0.9	-0.105361	1.24242	0.217065	0.84375	-0.169899	0.833333	-0.182322
301096	30	38	1	1	0	1	23.2335	0	1	1	1	0	0	0	0	1	0	0	0	0	0	0.45	0.35	0.8	1.28	0.61	1.08	12	12	12	16	16	16	0.459184	-0.778305	0.364583	-1.009	0.8	-0.223144	1.29293	0.25691	0.616162	-0.484246	1.06931	0.0670107
301105	26	38	0	1	1	0	19.5312	0	0	0	0	0	0	0	0	0	0	0	0	0	0	0.63	1.46	0.9	1.09	0.94	0.88	12	12	12	16	16	16	0.642857	-0.441833	1.52083	0.419258	0.9	-0.105361	1.10101	0.096228	0.949495	-0.0518251	0.871287	-0.137784
296646	28	40	1	1	0	1	34.2058	0	0	0	0	0	0	0	0	0	0	1	0	0	0	0.73	0.61	0.8	1.3	0.79	1.5	13	13	13	17	17	17	0.744898	-0.294508	0.635417	-0.453474	0.8	-0.223144	1.31313	0.272415	0.822917	-0.1949	1.47059	0.385662
296669	25	40	0	1	1	1	19.6283	0	0	0	0	0	0	0	0	0	0	0	0	0	0	0.47	0.79	1	0.65	1.08	0.74	13	13	13	17	17	17	0.479592	-0.73482	0.822917	-0.1949	1	0	0.656566	-0.420733	1.125	0.117783	0.72549	-0.320908
189639	29	40	1	1	1	0	18.1955	0	1	0	1	0	0	0	0	1	0	0	0	0	0	1.17	0.63	1.3	0.9	0.87	1.12	12	12	12	16	16	16	1.19388	0.177206	0.65625	-0.421213	1.3	0.262364	0.909091	-0.0953102	0.878788	-0.129212	1.10891	0.103378
256837	31	39	0	1	1	0	19.4674	0	0	0	0	0	0	0	0	0	0	0	0	0	0	1.35	1.14	1.1	1.05	1.64	1.17	13	13	13	17	17	17	1.37755	0.320307	1.1875	0.17185	1.1	0.0953102	1.06061	0.0588405	1.70833	0.535518	1.14706	0.137201
163820	30	39	1	1	1	0	23.7118	0	1	0	0	0	0	0	0	0	0	0	0	0	0	0.69	0.93	1.5	1.07	1.01	1.55	12	12	12	16	16	16	0.704082	-0.350861	0.96875	-0.0317487	1.5	0.405465	1.08081	0.077709	1.0202	0.0200007	1.53465	0.428305
256900	29	39	1	1	0	0	18.662	0	0	0	0	0	0	0	0	0	0	0	0	0	0	0.52	0.89	0.5	0.91	1.01	1.04	13	13	13	17	17	17	0.530612	-0.633724	0.927083	-0.0757118	0.5	-0.693147	0.919192	-0.0842603	1.05208	0.0507723	1.01961	0.0194181
256967	27	40	0	1	1	0	20.1951	0	0	0	0	0	0	0	0	0	0	0	0	0	0	0.8	2.28	0.9	0.93	2.91	0.79	12	12	12	16	16	16	0.816327	-0.202941	2.375	0.864997	0.9	-0.105361	0.939394	-0.0625204	2.93939	1.0782	0.782178	-0.245673
257056	25	39	1	1	0	0	22.2137	0	0	0	0	0	0	0	0	0	0	0	0	0	0	0.72	1.73	1.2	1.02	1.52	1.28	12	12	12	17	17	17	0.734694	-0.308301	1.80208	0.588943	1.2	0.182322	1.0303	0.029853	1.58333	0.459532	1.2549	0.227057
257092	22	37	0	1	1	0	20.9321	0	0	0	0	0	0	0	0	0	0	0	0	0	0	1.05	0.61	1.1	1.15	0.43	1.53	11	11	11	16	16	16	1.10526	0.100083	0.622449	-0.474094	1.1	0.0953102	1.16162	0.149812	0.434343	-0.83392	1.51485	0.415317
257213	22	40	1	1	0	0	18.7305	0	0	0	0	0	0	0	0	0	0	0	0	0	0	0.5	0.61	0.9	1.63	0.76	1.38	13	13	13	16	16	16	0.510204	-0.672944	0.635417	-0.453474	0.9	-0.105361	1.64646	0.49863	0.767677	-0.264387	1.36634	0.312133
295226	23	38	1	1	1	1	21.5858	0	0	0	0	0	0	0	0	0	0	0	0	0	0	0.7	1.6	1	1.45	1.96	1.15	12	12	12	16	16	16	0.714286	-0.336472	1.66667	0.510826	1	0	1.46465	0.381614	1.9798	0.682995	1.13861	0.129812
295258	29	40	0	1	1	1	20.3954	0	1	0	0	0	0	0	0	0	0	0	0	0	0	1.03	0.54	1.2	0.61	0.58	0.88	13	13	13	18	18	18	1.05102	0.0497615	0.5625	-0.575364	1.2	0.182322	0.616162	-0.484246	0.617021	-0.482852	0.838095	-0.176624
293496	29	38	1	1	1	1	26.5643	0	0	0	0	0	0	0	0	0	0	0	0	0	0	1.17	1.44	1	1.39	1.06	1.24	12	12	12	16	16	16	1.19388	0.177206	1.5	0.405465	1	0	1.40404	0.339354	1.07071	0.0683192	1.22772	0.205161
285733	31	39	1	1	1	0	21.6441	0	0	0	0	0	0	0	0	0	0	0	0	0	0	0.91	2.03	1.5	0.99	2.49	0.61	12	12	12	18	18	18	0.928571	-0.074108	2.11458	0.748858	1.5	0.405465	1	0	2.64894	0.974158	0.580952	-0.543086
254765	30	37	0	1	1	0	20.5457	0	1	0	0	0	0	0	0	0	0	0	0	0	0	0.75	2.06	1	0.92	1.61	1.22	13	13	13	18	18	18	0.765306	-0.267479	2.14583	0.763528	1	0	0.929293	-0.0733313	1.71277	0.53811	1.1619	0.150061
255041	33	35	1	1	0	0	24.0234	0	0	0	0	1	0	1	0	0	0	1	0	0	0	0.91	1.1	1.3	0.84	1.41	0.88	14	14	14	17	17	17	0.866667	-0.143101	1.1828	0.167881	1.3	0.262364	0.848485	-0.164303	1.46875	0.384412	0.862745	-0.147636
296682	28	40	0	1	1	1	19.6936	0	0	0	0	0	0	0	0	0	0	0	0	0	0	1.25	1.42	1.1	0.88	0.93	1.14	13	13	13	17	17	17	1.27551	0.243346	1.47917	0.391479	1.1	0.0953102	0.888889	-0.117783	0.96875	-0.0317487	1.11765	0.111226
294877	32	38	0	1	1	1	23.239	0	1	0	0	0	0	0	0	1	0	0	0	0	0	0.57	0.47	1.2	0.7	0.45	1.08	13	13	13	17	17	17	0.581633	-0.541916	0.489583	-0.714201	1.2	0.182322	0.707071	-0.346625	0.46875	-0.757686	1.05882	0.0571584
294933	24	40	1	0	0	1	28.3197	0	0	0	0	0	0	0	0	0	0	0	0	0	0	1.92	1.04	1.4	1.14	1.61	1.01	12	12	12	16	16	16	1.95918	0.672528	1.08333	0.0800427	1.4	0.336472	1.15152	0.141079	1.62626	0.486285	1	0
294964	33	39	0	1	0	0	20.4444	0	0	0	0	0	0	0	1	0	0	0	0	1	1	1.29	0.89	1.2	1.35	0.64	1.04	13	13	13	17	17	17	1.31633	0.274845	0.927083	-0.0757118	1.2	0.182322	1.36364	0.310155	0.666667	-0.405465	1.01961	0.0194181
261953	30	38	1	1	1	1	21.0938	0	0	0	0	0	0	0	0	0	0	1	0	0	0	1.69	0.47	1.1	0.96	0.55	1.3	12	12	12	16	16	16	1.72449	0.544931	0.489583	-0.714201	1.1	0.0953102	0.969697	-0.0307717	0.555556	-0.587787	1.28713	0.252414
245445	26	40	0	1	1	1	21.6311	0	1	0	1	0	0	0	0	0	0	0	0	0	0	1.54	0.9	0.9	1.18	1.17	1.13	13	13	13	17	17	17	1.57143	0.451985	0.9375	-0.0645385	0.9	-0.105361	1.19192	0.175565	1.21875	0.197826	1.10784	0.102415
248033	29	37	0	1	1	0	20.0288	0	0	0	0	0	0	0	0	0	0	1	0	0	0	0.42	1.28	1	0.8	0.93	1	12	12	12	17	17	17	0.428571	-0.847298	1.33333	0.287682	1	0	0.808081	-0.213093	0.96875	-0.0317487	0.980392	-0.0198026
258978	28	39	0	1	1	0	20.5499	0	0	0	0	0	0	0	0	0	0	0	0	0	0	0.95	0.46	1	0.9	0.51	1.17	12	12	12	17	17	17	0.969388	-0.0310906	0.479167	-0.735707	1	0	0.909091	-0.0953102	0.53125	-0.632523	1.14706	0.137201
217780	23	39	1	1	1	0	22.1893	0	1	0	0	0	0	0	0	0	0	0	0	0	0	0.54	0.64	0.8	1.22	0.65	1.44	12	12	12	16	16	16	0.55102	-0.595983	0.666667	-0.405465	0.8	-0.223144	1.23232	0.208901	0.656566	-0.420733	1.42574	0.354693
258708	33	41	1	1	0	0	20.8117	0	0	0	0	0	0	0	1	0	0	0	0	0	0	0.8	0.47	1	1.23	0.83	1.04	12	12	12	16	16	16	0.816327	-0.202941	0.489583	-0.714201	1	0	1.24242	0.217065	0.838384	-0.176279	1.0297	0.0292704
258714	29	41	1	1	1	0	22.0386	0	0	0	0	0	0	0	0	0	0	1	0	0	0	1.95	3.11	1	1.18	4.61	1.25	12	12	12	16	16	16	1.9898	0.688032	3.23958	1.17544	1	0	1.19192	0.175565	4.65657	1.53828	1.23762	0.213193
258718	23	39	0	1	1	0	18.5901	0	0	0	0	0	0	0	0	0	0	0	0	0	0	1.2	1.86	1	1.14	1.5	1.28	12	12	12	16	16	16	1.22449	0.202524	1.9375	0.661398	1	0	1.15152	0.141079	1.51515	0.415515	1.26733	0.23691
211693	27	39	0	1	0	0	22.8889	0	1	0	0	0	0	0	0	0	0	0	0	0	0	1	1.87	0.5	0.62	1.65	1.09	12	12	12	16	16	16	1.02041	0.0202027	1.94792	0.66676	0.5	-0.693147	0.626263	-0.467985	1.66667	0.510826	1.07921	0.0762274
258828	27	38	0	1	0	0	18.5901	0	0	0	0	0	0	0	0	0	0	0	0	0	0	0.49	1.83	1.1	1.05	1.6	1.68	12	12	12	16	16	16	0.5	-0.693147	1.90625	0.645138	1.1	0.0953102	1.06061	0.0588405	1.61616	0.480054	1.66337	0.508843
258883	19	40	1	1	0	0	23.4375	0	1	0	0	0	0	0	0	0	0	1	0	0	0	0.39	0.9	1.2	1.43	1.12	0.87	13	13	13	16	16	16	0.397959	-0.921406	0.9375	-0.0645385	1.2	0.182322	1.44444	0.367725	1.13131	0.123379	0.861386	-0.149212
162129	31	39	1	1	1	0	23.815	0	1	0	0	0	0	0	0	0	0	1	0	0	0	0.88	0.25	0.9	0.77	0.24	0.85	13	13	13	16	16	16	0.897959	-0.107631	0.260417	-1.34547	0.9	-0.105361	0.777778	-0.251314	0.242424	-1.41707	0.841584	-0.172469
147733	25	41	1	1	1	0	20.7031	0	1	0	0	0	0	0	0	0	0	0	0	0	0	0.91	1.06	0.8	1.67	1.48	1.01	12	12	12	16	16	16	0.928571	-0.074108	1.10417	0.0990909	0.8	-0.223144	1.68687	0.522874	1.49495	0.402092	1	0
259028	31	40	0	1	1	0	21.0938	0	0	0	0	0	0	0	0	0	0	0	0	0	0	1.29	0.44	0.7	1.29	0.75	1.03	12	12	12	17	17	17	1.31633	0.274845	0.458333	-0.780159	0.7	-0.356675	1.30303	0.264693	0.78125	-0.24686	1.0098	0.00975617
259079	27	39	0	1	0	0	20.4382	0	0	0	0	0	0	0	0	0	0	0	0	0	0	0.62	0.74	1.1	1.1	0.89	1.12	12	12	12	16	16	16	0.632653	-0.457833	0.770833	-0.260283	1.1	0.0953102	1.11111	0.105361	0.89899	-0.106483	1.10891	0.103378
259632	25	41	0	1	1	0	20.5049	0	0	0	0	0	0	0	0	0	0	0	0	0	0	1.12	4.79	0.9	1.74	3.81	0.86	12	12	12	16	16	16	1.14286	0.133531	4.98958	1.60735	0.9	-0.105361	1.75758	0.563935	3.84848	1.34768	0.851485	-0.160773
259651	30	40	0	1	0	0	22.4323	0	1	0	0	0	0	0	0	0	0	0	0	0	0	0.46	1.96	1.1	0.93	1.18	1.07	13	13	13	17	17	17	0.469388	-0.756326	2.04167	0.713766	1.1	0.0953102	0.939394	-0.0625204	1.22917	0.206336	1.04902	0.047856
257598	32	40	1	1	0	0	21.7784	0	1	0	0	0	0	0	0	0	0	0	0	0	0	0.52	0.4	1	1.21	0.35	1.24	12	12	12	17	17	17	0.530612	-0.633724	0.416667	-0.875469	1	0	1.22222	0.200671	0.364583	-1.009	1.21569	0.195309
257775	27	39	1	1	1	0	28.0404	0	0	0	0	0	0	0	1	0	0	0	0	0	0	0.81	0.56	1.2	0.8	0.5	1.04	12	12	12	17	17	17	0.826531	-0.190518	0.583333	-0.538997	1.2	0.182322	0.808081	-0.213093	0.520833	-0.652325	1.01961	0.0194181
228036	29	39	0	1	1	0	28.3039	0	1	0	0	0	0	0	0	0	0	0	0	0	0	0.62	3.15	0.7	0.75	2.58	1.28	12	12	12	16	16	16	0.632653	-0.457833	3.28125	1.18822	0.7	-0.356675	0.757576	-0.277632	2.60606	0.95784	1.26733	0.23691
257932	33	37	1	1	0	0	22.3133	0	1	0	0	0	0	0	0	0	0	0	0	0	0	0.56	0.74	1	1.34	0.88	1.42	12	12	12	14	14	14	0.571429	-0.559616	0.770833	-0.260283	1	0	1.32673	0.282719	0.830189	-0.186102	1.49474	0.40195
257353	29	39	0	1	0	0	18.9069	0	0	0	0	0	0	0	0	0	0	0	0	0	0	0.65	1.16	1.1	1.13	0.84	0.87	13	13	13	16	16	16	0.663265	-0.41058	1.20833	0.189242	1.1	0.0953102	1.14141	0.132268	0.848485	-0.164303	0.861386	-0.149212
255709	30	40	0	1	1	0	21.2279	0	0	0	0	0	0	0	0	0	0	0	0	0	0	0.58	0.68	0.8	1.48	0.52	1.18	13	13	13	17	17	17	0.591837	-0.524524	0.708333	-0.34484	0.8	-0.223144	1.49495	0.402092	0.541667	-0.613104	1.15686	0.145712
215463	24	39	0	1	0	0	23.4375	0	1	0	0	0	0	0	0	0	0	0	0	0	0	1.28	0.42	1.1	0.79	0.5	1.31	13	13	13	18	18	18	1.30612	0.267063	0.4375	-0.826679	1.1	0.0953102	0.79798	-0.225672	0.531915	-0.631272	1.24762	0.221237
239689	25	39	0	1	1	0	22.6562	0	0	0	0	0	0	0	0	0	0	0	0	0	0	0.75	1.98	1.1	0.92	2.37	1.49	13	13	13	17	17	17	0.765306	-0.267479	2.0625	0.723919	1.1	0.0953102	0.929293	-0.0733313	2.46875	0.903712	1.46078	0.378973
205074	28	40	0	1	1	0	24.0344	0	0	0	0	0	0	0	0	0	0	0	0	0	0	1.76	1.33	0.9	0.93	1.19	1.12	13	13	13	17	17	17	1.79592	0.585517	1.38542	0.326001	0.9	-0.105361	0.939394	-0.0625204	1.23958	0.214775	1.09804	0.0935261
192869	29	39	0	1	0	0	23.0332	0	1	0	0	0	0	0	0	0	0	0	0	0	0	0.33	0.77	1.1	0.58	0.45	0.89	13	13	13	17	17	17	0.336735	-1.08846	0.802083	-0.220543	1.1	0.0953102	0.585859	-0.534677	0.46875	-0.757686	0.872549	-0.136336
235375	26	40	1	1	1	0	21.3675	0	1	0	0	0	0	0	0	0	0	1	0	0	0	0.87	1.71	0.9	1.58	1.64	0.94	13	13	13	17	17	17	0.887755	-0.119059	1.78125	0.577315	0.9	-0.105361	1.59596	0.467475	1.70833	0.535518	0.921569	-0.081678
258623	23	40	1	1	0	0	21.9076	0	0	0	0	0	0	0	0	0	0	0	0	0	0	2.19	1.66	1	1.05	0.77	1.59	12	12	12	17	17	17	2.23469	0.804104	1.72917	0.54764	1	0	1.06061	0.0588405	0.802083	-0.220543	1.55882	0.443931
258631	27	40	0	1	0	0	18.5178	0	0	0	0	0	0	0	0	0	0	0	0	0	0	1.84	2.17	0.9	1.08	2.45	0.85	13	13	13	18	18	18	1.87755	0.629968	2.26042	0.815549	0.9	-0.105361	1.09091	0.0870114	2.60638	0.957963	0.809524	-0.211309
258693	28	40	0	1	0	0	21.2279	0	0	0	0	0	0	0	0	0	0	1	0	0	0	0.89	1.5	1.3	0.92	2.23	1.49	13	13	13	17	17	17	0.908163	-0.0963311	1.5625	0.446287	1.3	0.262364	0.929293	-0.0733313	2.32292	0.842824	1.46078	0.378973
259693	33	40	0	1	0	0	19.5312	0	0	0	0	0	0	0	0	0	0	0	0	0	0	1.85	1.16	1	1.82	1.85	1.5	14	14	14	18	18	18	1.7619	0.566395	1.24731	0.220991	1	0	1.83838	0.608887	1.96809	0.677061	1.42857	0.356675
259716	26	39	1	1	1	0	21.3382	0	0	0	0	0	0	0	0	0	0	0	0	0	0	0.4	0.78	0.7	0.69	0.5	1.06	12	12	12	16	16	16	0.408163	-0.896088	0.8125	-0.207639	0.7	-0.356675	0.69697	-0.361013	0.505051	-0.683097	1.0495	0.0483186
210657	27	40	0	1	0	0	21.5139	0	1	0	0	0	0	0	0	0	0	0	0	0	0	1	1.46	1.1	0.95	1.2	0.58	13	13	13	17	17	17	1.02041	0.0202027	1.52083	0.419258	1.1	0.0953102	0.959596	-0.041243	1.25	0.223144	0.568627	-0.56453
259836	25	40	1	1	0	0	19.8791	0	0	0	0	0	0	0	0	0	0	0	0	0	0	0.7	1.07	0.7	1.03	0.81	0.92	13	13	13	17	17	17	0.714286	-0.336472	1.11458	0.108481	0.7	-0.356675	1.0404	0.0396091	0.84375	-0.169899	0.901961	-0.103184
[truncated: 17,434 more rows]
